# Supplementary material for: Diverse patterns of genomic targeting by transcriptional regulators in Drosophila melanogaster
Source: HighWire-hosted journal article supplement (doi:10.1101/gr.168807.113), 2014-07-01
Supplement: Supplemental_TableS3.xlsx [file Supplemental_TableS3.xlsx]

## Sheet: Interaction.Matrix_HOT.removed
	10T-DFD-GFP.3229_Dfd_Embryos-16-24-hr	10T-DFD-GFP.3230_Dfd_W3L	5T-eve-GFP.3401_eve_Embryos-8-16-hr	7T-CAD.2626_cad_Embryos-0-4-hr	7T-CAD.3403_cad_W3L	7T-GFP.902_cad_Embryos-0-4-hr_ChIPchip	AbdB-GFP.AbdB-GFP-W3L_Abd-B_W3L	BDTNP.Iso1_Mad_Embryos-2-4-hr	BDTNP.Iso1_Med_Embryos-2-4-hr	BDTNP.Iso1_bcd_Embryos-2-4-hr	BDTNP.Iso1_da_Embryos-2-4-hr	BDTNP.Iso1_dl_Embryos-2-4-hr	BDTNP.Iso1_ftz_Embryos-2-4-hr	BDTNP.Iso1_hb_Embryos-2-4-hr	BDTNP.Iso1_kni_Embryos-2-4-hr	BDTNP.Iso1_prd_Embryos-2-4-hr	BDTNP.Iso1_shn_Embryos-2-4-hr	BDTNP.Iso1_slp1_Embryos-2-4-hr	BDTNP.Iso1_sna_Embryos-2-4-hr	BDTNP.Iso1_tll_Embryos-2-4-hr	BDTNP.Iso1_twi_Embryos-2-4-hr	BDTNP.Iso1_z_Embryos-2-4-hr	Dfd-GFP.Dfd-GFP-0-8_Dfd_Embryos-0-8-hr	EcR-GFP.2641_EcR_pupae-WPP-10-11-hr	EcR-GFP.2642_EcR_WPP-30-33-hr	Eip74-GFP.Eip74-GFP-8-16_Eip74EF_Embryos-8-16-hr	Cmi-0-8_Lpt_Embryos-0-8-hr	TBP-0-8_Tbp_Embryos-0-8-hr	Furlong.Iso1_Mef2_Embryos-10-12-hr	Furlong.Iso1_Mef2_Embryos-2-4-hr	Furlong.Iso1_Mef2_Embryos-4-6-hr	Furlong.Iso1_Mef2_Embryos-6-8-hr	Furlong.Iso1_Mef2_Embryos-8-10-hr	Furlong.Iso1_bap_Embryos-6-8-hr	Furlong.Iso1_bin_Embryos-10-12-hr	Furlong.Iso1_bin_Embryos-6-8-hr	Furlong.Iso1_bin_Embryos-8-10-hr	Furlong.Iso1_tin_Embryos-2-4-hr	Furlong.Iso1_tin_Embryos-4-6-hr	Furlong.Iso1_tin_Embryos-6-8-hr	Furlong.Iso1_twi_Embryos-2-4-hr	Furlong.Iso1_twi_Embryos-4-6-hr	Furlong.Iso1_twi_Embryos-6-8-hr	Hr46-GFP.TCF-nonISO1-0-8_pan_Embryos-0-8-hr	Hr78-GFP.Hr78-GFP-8-16_Hr78_Embryos-8-16-hr	Hr78-GFP.Hr78-GFP-W3L_Hr78_W3L	Iso1.24_modmdg4_Embryos-0-12-hr_ChIPchip	Iso1.2558_HDAC11_Embryos-0-12-hr_ChIPchip	Iso1.2559_HDAC1_Embryos-0-12-hr_ChIPchip
10T-DFD-GFP.3229_Dfd_Embryos-16-24-hr	NA	69.1886	-0.576691	-0.872268	2.16451	-2.07786	-0.567819	13.9856	-5.58851	-1.61864	-5.94505	-8.96539	-0.351947	-2.83884	-1.18846	-3.14183	-1.49952	-1.82405	-3.576	-1.3442	-7.52496	-1.0184	7.34981	4.16675	0.979855	-0.250725	3.46147	-2.04559	-2.05009	1.97399	-1.91044	-1.16059	-0.93254	-0.778396	-1.66163	-0.912331	-1.03004	-0.669077	-1.35209	-1.56213	-1.57763	-1.71089	-1.23675	20.6065	36.8073	3.05295	-2.81109	-2.62283	-4.65534
10T-DFD-GFP.3230_Dfd_W3L	69.1886	NA	-3.0442	0.11271	6.76796	-2.62604	0.946194	29.1312	-7.11606	-2.11062	-7.65838	-11.4869	1.46069	-3.71176	-1.19605	-4.07845	3.95147	-0.81142	-3.26521	-0.602347	-9.29169	-1.54031	9.60933	8.29474	2.33193	11.171	12.3234	-3.11152	-2.28257	-0.177194	-2.46855	-1.76436	-1.86714	-1.73104	-1.22603	-1.82913	-0.860542	-1.03661	-1.52681	-1.97761	-1.90565	-2.47177	-0.837833	102.509	45.4311	2.38113	-4.06934	-3.69112	-6.16398
5T-eve-GFP.3401_eve_Embryos-8-16-hr	-0.576691	-3.0442	NA	31.5283	177.708	27.2694	21.6489	-0.268507	-4.04974	1.2036	-8.5162	-13.9671	0.450138	8.09376	1.43756	-2.07517	8.02964	10.3076	-4.25355	3.67235	-10.7475	31.2037	84.5865	137.128	65.2218	299.809	104.632	31.7549	42.9936	97.7863	34.8437	46.4517	58.2368	74.633	73.3443	93.8365	143.119	23.7351	23.4771	43.452	13.7457	25.0448	41.4289	135.482	304.417	164.641	5.23173	55.5087	3.69297
7T-CAD.2626_cad_Embryos-0-4-hr	-0.872268	0.11271	31.5283	NA	62.4924	97.16	45.9406	134.542	1.49119	71.3509	-2.39268	-11.4855	165.947	27.6895	452.067	19.3352	317.665	35.1433	13.4581	254.692	-6.77603	8.36686	32.452	15.2121	5.23629	46.1438	50.8	7.52066	0.292522	63.9402	21.4722	5.92675	3.87865	21.3891	4.39234	15.087	13.0978	32.7526	24.3193	14.8159	70.2006	25.7138	14.7296	11.331	52.2123	-0.207165	-2.55244	-2.03035	-5.32638
7T-CAD.3403_cad_W3L	2.16451	6.76796	177.708	62.4924	NA	8.1758	11.1445	-0.963689	-6.25157	-1.74463	-6.73772	-10.6488	0.291089	-3.51318	-0.232111	-3.11698	-0.0858803	-1.57863	-4.01219	0.250666	-8.21426	-1.16116	4.88097	19.7986	2.06639	29.5246	2.83674	-1.9615	-1.02528	1.14934	-1.54562	-1.37889	-0.0593692	-0.155215	0.0726809	-0.152746	2.6244	-1.09063	-1.3908	-0.841394	-1.9196	-1.7839	-1.42897	3.01816	63.7451	18.7475	-3.00755	-3.22627	-4.72364
7T-GFP.902_cad_Embryos-0-4-hr_ChIPchip	-2.07786	-2.62604	27.2694	97.16	8.1758	NA	17.583	279.661	16.0918	145.089	6.22565	-9.15146	361.856	62.4747	1164.86	52.2247	524.32	91.8547	32.1332	486.685	-1.30272	29.3175	14.4985	31.7154	20.6186	74.0646	150.214	18.0889	18.9764	195.665	62.4049	31.4013	26.6684	60.2896	28.819	73.6593	68.9837	103.928	65.2172	73.9819	144.401	72.1787	48.3358	43.303	62.5867	63.7228	-1.04791	17.311	1.98536
AbdB-GFP.AbdB-GFP-W3L_Abd-B_W3L	-0.567819	0.946194	21.6489	45.9406	11.1445	17.583	NA	1.27723	-4.50049	-1.527	-5.59255	-8.3191	-0.923874	-2.36774	-0.599735	-2.7924	-0.336588	-1.86443	-2.93486	-1.14176	-6.11583	-0.859613	42.7135	10.6356	2.71713	158.524	4.05479	-0.884033	-1.73232	0.0734401	-1.24286	-1.02732	-0.683132	-0.145925	-1.28285	-1.22068	-0.835592	-1.25404	-1.53674	-1.2685	-1.3	-1.44546	-1.41049	-0.464792	218.327	209.416	-0.818759	-2.75795	-3.72991
BDTNP.Iso1_Mad_Embryos-2-4-hr	13.9856	29.1312	-0.268507	134.542	-0.963689	279.661	1.27723	NA	-4.1854	229.426	2020.48	3296.13	241.836	614.388	41.778	-0.148218	62.3859	3.57909	0.794555	13.6806	-6.14224	-1.6387	-10.2148	-0.936409	-1.98714	2.38907	4.80301	-1.90876	-1.95071	2.37782	0.37087	-1.25631	-1.63497	-1.19397	-1.83537	-1.67892	-1.0104	2.59729	2.30264	-1.40762	5.42691	0.856449	-0.330598	1.36868	-2.8313	0.849472	-3.26696	-3.38188	-4.1604
BDTNP.Iso1_Med_Embryos-2-4-hr	-5.58851	-7.11606	-4.04974	1.49119	-6.25157	16.0918	-4.50049	-4.1854	NA	8.83208	197.023	480.978	-1.7653	55.9022	-3.02599	400.604	2388.49	756.518	294.164	1656.25	92.3416	438.319	759.449	291.714	227.139	1255.25	2083.3	640.465	148.247	1567.93	623.292	315.536	252.343	396.093	156.464	416.589	334.476	460.119	588.055	512.282	1012.04	683.092	554.165	602.056	1890.01	1022.94	87.8893	279.589	239.971
BDTNP.Iso1_bcd_Embryos-2-4-hr	-1.61864	-2.11062	1.2036	71.3509	-1.74463	145.089	-1.527	229.426	8.83208	NA	2.38278	-8.99928	97.8688	52.649	848.79	33.5041	483.885	58.0771	32.4047	314.098	-2.86537	11.7459	7.28841	3.40942	0.625999	10.7627	66.371	3.55197	-0.536033	91.9358	18.6475	4.62512	3.02827	19.4264	1.13331	5.20501	14.0424	44.2689	31.0121	28.7637	95.8317	24.7819	15.4382	7.69461	6.3194	11.125	-3.55337	-1.60218	-4.06613
BDTNP.Iso1_da_Embryos-2-4-hr	-5.94505	-7.65838	-8.5162	-2.39268	-6.73772	6.22565	-5.59255	2020.48	197.023	2.38278	NA	43.6534	1554.8	449.675	2791.26	498.113	2409.13	744.446	314.9	1553.6	124.534	236.302	403.337	378.334	313.801	769.502	2136.82	311.381	161.663	1907.29	883.998	410.918	172.546	592.176	255.238	357.54	351.838	626.792	983.327	810.844	1290.41	999.301	823.903	852.627	668.024	883.791	64.7284	215.861	104.082
BDTNP.Iso1_dl_Embryos-2-4-hr	-8.96539	-11.4869	-13.9671	-11.4855	-10.6488	-9.15146	-8.3191	3296.13	480.978	-8.99928	43.6534	NA	2202.01	893.447	4561.55	710.09	3455.62	1288.99	637.238	2599.19	237.344	1155.15	4244.51	1771.76	1122.42	8042.75	4193.8	1413.84	660.298	3443.87	1368.32	961.53	914.173	1170.72	733.244	1299.93	1119.88	1678.39	1263.44	1299.52	1932.71	1392.22	1345.36	2579.04	7894.26	5307.35	391.588	802.343	595.299
BDTNP.Iso1_ftz_Embryos-2-4-hr	-0.351947	1.46069	0.450138	165.947	0.291089	361.856	-0.923874	241.836	-1.7653	97.8688	1554.8	2202.01	NA	7.16209	187.666	12.5438	133.047	28.5971	7.60987	77.6664	-5.69912	-0.730421	12.3446	-1.33855	-1.68823	32.7127	8.54402	-2.099	-2.62144	14.8984	4.37138	-1.5797	-1.44403	0.983135	-1.93131	-0.710264	-0.952877	19.7875	9.06382	3.7139	31.8221	9.0637	2.51404	4.41546	22.2115	-0.416745	-3.34652	-3.16218	-4.85492
BDTNP.Iso1_hb_Embryos-2-4-hr	-2.83884	-3.71176	8.09376	27.6895	-3.51318	62.4747	-2.36774	614.388	55.9022	52.649	449.675	893.447	7.16209	NA	2104.55	127.4	1069.8	208.36	90.8249	714.465	13.3043	109.208	61.7855	54.9652	40.6352	221.436	633.343	66.809	28.9171	505.563	166.107	68.0996	54.9742	91.0372	30.6799	85.9615	75.6965	219.967	172.872	164.31	365.38	155.971	127.345	71.1044	151.722	289.929	8.51162	29.5437	18.3631
BDTNP.Iso1_kni_Embryos-2-4-hr	-1.18846	-1.19605	1.43756	452.067	-0.232111	1164.86	-0.599735	41.778	-3.02599	848.79	2791.26	4561.55	187.666	2104.55	NA	4.40425	140.876	12.1191	2.99338	97.3834	-6.13229	-0.586241	-2.05888	-1.07389	-1.56928	-1.99952	5.36197	-2.26955	-2.26922	5.89811	-0.0882647	-1.70985	-1.3436	1.02848	-1.99115	-1.05217	-1.08177	3.70442	0.774282	1.015	23.9423	0.23611	-0.622882	-1.15437	-0.692648	-1.86217	-3.7112	-3.64105	-4.46272
BDTNP.Iso1_prd_Embryos-2-4-hr	-3.14183	-4.07845	-2.07517	19.3352	-3.11698	52.2247	-2.7924	-0.148218	400.604	33.5041	498.113	710.09	12.5438	127.4	4.40425	NA	1020.56	247.573	75.8297	615.625	11.1266	64.5307	24.109	40.1412	29.6427	94.1257	353.728	36.0464	17.021	339.936	177.662	53.862	25.9093	107.998	18.8206	70.439	57.4971	349.326	209.592	158.456	388.183	218.692	126.601	60.0534	87.8343	132.282	4.31013	24.4745	5.70524
BDTNP.Iso1_shn_Embryos-2-4-hr	-1.49952	3.95147	8.02964	317.665	-0.0858803	524.32	-0.336588	62.3859	2388.49	483.885	2409.13	3455.62	133.047	1069.8	140.876	1020.56	NA	18.8036	7.62357	144.096	-5.61453	0.153016	-2.35818	-0.636888	-1.43957	0.742381	53.507	-1.81831	-1.96487	37.587	5.84481	-0.308152	-0.955867	2.41711	-1.27777	0.962302	0.599906	13.3016	10.4392	7.88992	36.2787	6.94926	2.80853	-0.652714	-1.35913	2.84259	-3.4067	-3.22141	-4.38782
BDTNP.Iso1_slp1_Embryos-2-4-hr	-1.82405	-0.81142	10.3076	35.1433	-1.57863	91.8547	-1.86443	3.57909	756.518	58.0771	744.446	1288.99	28.5971	208.36	12.1191	247.573	18.8036	NA	17.9976	171.873	-3.35726	14.9514	-1.80974	15.1868	7.28832	-0.16072	92.3335	10.5684	1.96911	97.8699	52.0918	14.6415	7.72048	33.8063	21.8078	75.9994	43.1734	128.672	64.0778	43.9981	105.867	60.5223	44.0478	25.6012	49.4563	15.9683	-2.33932	5.77585	0.247448
BDTNP.Iso1_sna_Embryos-2-4-hr	-3.576	-3.26521	-4.25355	13.4581	-4.01219	32.1332	-2.93486	0.794555	294.164	32.4047	314.9	637.238	7.60987	90.8249	2.99338	75.8297	7.62357	17.9976	NA	548.575	16.1625	51.4477	99.9518	54.6628	21.4353	68.145	421.5	48.4258	14.4676	286.602	114.592	37.7427	18.2896	78.7703	14.1692	56.4284	37.6549	236.172	148.352	131.314	403.343	156.639	122.544	136.412	212.73	155.204	5.85543	26.0495	14.3381
BDTNP.Iso1_tll_Embryos-2-4-hr	-1.3442	-0.602347	3.67235	254.692	0.250666	486.685	-1.14176	13.6806	1656.25	314.098	1553.6	2599.19	77.6664	714.465	97.3834	615.625	144.096	171.873	548.575	NA	-4.80818	1.24852	0.344673	1.11688	-0.665601	-2.03822	39.8991	-1.32815	-1.61899	51.0931	6.69021	0.898811	0.222148	12.1668	0.0611796	10.3978	7.23102	17.0963	12.9073	11.6867	50.7871	6.75552	3.87677	1.71014	6.22519	4.21325	-3.30369	-2.34816	-4.81022
BDTNP.Iso1_twi_Embryos-2-4-hr	-7.52496	-9.29169	-10.7475	-6.77603	-8.21426	-1.30272	-6.11583	-6.14224	92.3416	-2.86537	124.534	237.344	-5.69912	13.3043	-6.13229	11.1266	-5.61453	-3.35726	16.1625	-4.80818	NA	547.37	680.264	554.471	328.164	1326.26	2585.61	593.104	328.198	2606.33	1214.73	664.717	531.356	1032.56	493.528	945.547	912.104	1767.94	1023.1	1038.26	1624.34	1439.96	1418.53	1150.95	1563.56	1167	129.206	346.698	233.714
BDTNP.Iso1_z_Embryos-2-4-hr	-1.0184	-1.54031	31.2037	8.36686	-1.16116	29.3175	-0.859613	-1.6387	438.319	11.7459	236.302	1155.15	-0.730421	109.208	-0.586241	64.5307	0.153016	14.9514	51.4477	1.24852	547.37	NA	26.6178	63.6681	39.8297	132.037	222.777	34.9689	19.4951	108.49	37.4178	33.4919	35.3762	39.2567	18.5426	34.4201	30.6353	29.6673	37.457	50.6187	17.2495	29.9465	38.3295	31.9178	83.0795	121.867	4.13799	8.41196	6.2799
Dfd-GFP.Dfd-GFP-0-8_Dfd_Embryos-0-8-hr	7.34981	9.60933	84.5865	32.452	4.88097	14.4985	42.7135	-10.2148	759.449	7.28841	403.337	4244.51	12.3446	61.7855	-2.05888	24.109	-2.35818	-1.80974	99.9518	0.344673	680.264	26.6178	NA	-0.404583	-0.749408	1746.64	7.59299	2.89372	-1.63326	-0.433874	-1.46777	-1.01131	-1.42427	-1.58479	-1.12489	-0.763941	-0.357634	-1.4413	-1.53206	-1.54022	-1.67778	-1.21972	-1.05124	7.62491	603.266	673.702	-2.39837	-0.947566	-3.65494
EcR-GFP.2641_EcR_pupae-WPP-10-11-hr	4.16675	8.29474	137.128	15.2121	19.7986	31.7154	10.6356	-0.936409	291.714	3.40942	378.334	1771.76	-1.33855	54.9652	-1.07389	40.1412	-0.636888	15.1868	54.6628	1.11688	554.471	63.6681	-0.404583	NA	133.179	24.3933	17.6262	-0.994443	0.314892	2.48919	-0.496836	0.545989	3.95547	3.99051	2.51162	2.16122	3.27081	-0.29182	-1.05585	0.433476	-1.67941	-1.10354	-0.634776	1.73828	2.47168	61.2529	-3.22351	-2.31942	-4.17931
EcR-GFP.2642_EcR_WPP-30-33-hr	0.979855	2.33193	65.2218	5.23629	2.06639	20.6186	2.71713	-1.98714	227.139	0.625999	313.801	1122.42	-1.68823	40.6352	-1.56928	29.6427	-1.43957	7.28832	21.4353	-0.665601	328.164	39.8297	-0.749408	133.179	NA	45.1244	47.7075	1.04096	4.40787	14.0858	4.56861	7.76048	14.3599	16.5374	7.85527	9.55718	11.9993	3.11091	1.06619	9.92109	-1.04827	0.737394	3.88449	8.5261	19.5206	106.722	-3.81427	-0.0355684	-4.14942
Eip74-GFP.Eip74-GFP-8-16_Eip74EF_Embryos-8-16-hr	-0.250725	11.171	299.809	46.1438	29.5246	74.0646	158.524	2.38907	1255.25	10.7627	769.502	8042.75	32.7127	221.436	-1.99952	94.1257	0.742381	-0.16072	68.145	-2.03822	1326.26	132.037	1746.64	24.3933	45.1244	NA	2.42138	-0.162071	-1.37137	-0.326154	-1.55973	-1.2447	-0.875204	-0.709964	-1.32614	-1.4042	-0.913935	-1.30384	-1.66758	-1.1988	-1.71326	-1.60341	-1.27032	-0.351149	1707.36	147.779	-2.39494	-1.99162	-3.40919
Cmi-0-8_Lpt_Embryos-0-8-hr	3.46147	12.3234	104.632	50.8	2.83674	150.214	4.05479	4.80301	2083.3	66.371	2136.82	4193.8	8.54402	633.343	5.36197	353.728	53.507	92.3335	421.5	39.8991	2585.61	222.777	7.59299	17.6262	47.7075	2.42138	NA	9.9965	3.22882	75.5732	25.3039	12.7657	10.8858	16.4269	3.73397	14.6623	15.1123	20.3753	21.8941	26.6328	16.215	17.3558	23.331	37.4675	59.4802	64.0037	-2.04386	0.892359	-2.17021
TBP-0-8_Tbp_Embryos-0-8-hr	-2.04559	-3.11152	31.7549	7.52066	-1.9615	18.0889	-0.884033	-1.90876	640.465	3.55197	311.381	1413.84	-2.099	66.809	-2.26955	36.0464	-1.81831	10.5684	48.4258	-1.32815	593.104	34.9689	2.89372	-0.994443	1.04096	-0.162071	9.9965	NA	27.5944	108.708	71.6982	79.9374	48.0955	34.8919	25.6074	52.3551	43.8766	27.6074	40.5553	43.5378	38.6944	52.7745	75.0709	44.135	1274.16	825.85	36.5541	69.3522	70.1513
Furlong.Iso1_Mef2_Embryos-10-12-hr	-2.05009	-2.28257	42.9936	0.292522	-1.02528	18.9764	-1.73232	-1.95071	148.247	-0.536033	161.663	660.298	-2.62144	28.9171	-2.26922	17.021	-1.96487	1.96911	14.4676	-1.61899	328.198	19.4951	-1.63326	0.314892	4.40787	-1.37137	3.22882	27.5944	NA	392.491	148.673	188.168	390.588	21.6932	58.9282	28.2733	22.8628	62.2863	58.1201	155.093	35.3102	48.4241	128.161	78.8029	269.593	185.727	1.51599	13.9634	1.28327
Furlong.Iso1_Mef2_Embryos-2-4-hr	1.97399	-0.177194	97.7863	63.9402	1.14934	195.665	0.0734401	2.37782	1567.93	91.9358	1907.29	3443.87	14.8984	505.563	5.89811	339.936	37.587	97.8699	286.602	51.0931	2606.33	108.49	-0.433874	2.48919	14.0858	-0.326154	75.5732	108.708	392.491	NA	32.6275	15.1354	16.2034	104.993	98.1055	167.503	82.11	37.0169	20.2664	32.7041	14.1303	14.8694	23.4533	-0.361121	3.62753	7.99522	-2.93975	-3.02155	-3.97145
Furlong.Iso1_Mef2_Embryos-4-6-hr	-1.91044	-2.46855	34.8437	21.4722	-1.54562	62.4049	-1.24286	0.37087	623.292	18.6475	883.998	1368.32	4.37138	166.107	-0.0882647	177.662	5.84481	52.0918	114.592	6.69021	1214.73	37.4178	-1.46777	-0.496836	4.56861	-1.55973	25.3039	71.6982	148.673	32.6275	NA	165.781	147.967	42.1914	42.417	58.8838	19.607	322.671	237.303	279.936	159.083	227.374	217.711	31.9174	76.1645	63.5174	-0.412995	8.85408	1.24747
Furlong.Iso1_Mef2_Embryos-6-8-hr	-1.16059	-1.76436	46.4517	5.92675	-1.37889	31.4013	-1.02732	-1.25631	315.536	4.62512	410.918	961.53	-1.5797	68.0996	-1.70985	53.862	-0.308152	14.6415	37.7427	0.898811	664.717	33.4919	-1.01131	0.545989	7.76048	-1.2447	12.7657	79.9374	188.168	15.1354	165.781	NA	306.641	33.7768	53.6814	56.3967	22.2465	183.97	161.079	294.217	79.7454	131.886	250.746	37.7303	238.251	247.262	5.45077	20.7021	6.82233
Furlong.Iso1_Mef2_Embryos-8-10-hr	-0.93254	-1.86714	58.2368	3.87865	-0.0593692	26.6684	-0.683132	-1.63497	252.343	3.02827	172.546	914.173	-1.44403	54.9742	-1.3436	25.9093	-0.955867	7.72048	18.2896	0.222148	531.356	35.3762	-1.42427	3.95547	14.3599	-0.875204	10.8858	48.0955	390.588	16.2034	147.967	306.641	NA	37.8744	94.3279	60.3147	34.6238	78.6578	67.5166	166.236	30.4471	54.0283	137.563	19.3591	73.9868	143.884	0.834577	8.37508	0.346282
Furlong.Iso1_bap_Embryos-6-8-hr	-0.778396	-1.73104	74.633	21.3891	-0.155215	60.2896	-0.145925	-1.19397	396.093	19.4264	592.176	1170.72	0.983135	91.0372	1.02848	107.998	2.41711	33.8063	78.7703	12.1668	1032.56	39.2567	-1.58479	3.99051	16.5374	-0.709964	16.4269	34.8919	21.6932	104.993	42.1914	33.7768	37.8744	NA	41.1699	111.789	175.75	54.4654	56.6762	135.126	15.9253	35.7498	63.9142	10.1182	13.3912	12.1073	-3.01675	-0.873348	-4.69004
Furlong.Iso1_bin_Embryos-10-12-hr	-1.66163	-1.22603	73.3443	4.39234	0.0726809	28.819	-1.28285	-1.83537	156.464	1.13331	255.238	733.244	-1.93131	30.6799	-1.99115	18.8206	-1.27777	21.8078	14.1692	0.0611796	493.528	18.5426	-1.12489	2.51162	7.85527	-1.32614	3.73397	25.6074	58.9282	98.1055	42.417	53.6814	94.3279	41.1699	NA	356.907	521	47.3886	29.197	109.343	17.3529	22.1385	46.3019	43.5183	132.039	49.8386	-2.48151	2.70037	-3.03737
Furlong.Iso1_bin_Embryos-6-8-hr	-0.912331	-1.82913	93.8365	15.087	-0.152746	73.6593	-1.22068	-1.67892	416.589	5.20501	357.54	1299.93	-0.710264	85.9615	-1.05217	70.439	0.962302	75.9994	56.4284	10.3978	945.547	34.4201	-0.763941	2.16122	9.55718	-1.4042	14.6623	52.3551	28.2733	167.503	58.8838	56.3967	60.3147	111.789	356.907	NA	271.733	48.4126	53.08	127.167	20.4453	36.1169	59.3479	28.9873	28.0178	19.1701	-2.97874	2.58437	-2.44018
Furlong.Iso1_bin_Embryos-8-10-hr	-1.03004	-0.860542	143.119	13.0978	2.6244	68.9837	-0.835592	-1.0104	334.476	14.0424	351.838	1119.88	-0.952877	75.6965	-1.08177	57.4971	0.599906	43.1734	37.6549	7.23102	912.104	30.6353	-0.357634	3.27081	11.9993	-0.913935	15.1123	43.8766	22.8628	82.11	19.607	22.2465	34.6238	175.75	521	271.733	NA	15.6313	12.5131	54.0438	7.42993	9.83359	22.3581	5.00691	5.00299	15.0685	-3.39891	-2.24391	-4.62249
Furlong.Iso1_tin_Embryos-2-4-hr	-0.669077	-1.03661	23.7351	32.7526	-1.09063	103.928	-1.25404	2.59729	460.119	44.2689	626.792	1678.39	19.7875	219.967	3.70442	349.326	13.3016	128.672	236.172	17.0963	1767.94	29.6673	-1.4413	-0.29182	3.11091	-1.30384	20.3753	27.6074	62.2863	37.0169	322.671	183.97	78.6578	54.4654	47.3886	48.4126	15.6313	NA	170.099	208.161	92.7154	118.484	98.1397	14.2206	4.70743	0.772242	-3.47113	0.0384841	-4.66337
Furlong.Iso1_tin_Embryos-4-6-hr	-1.35209	-1.52681	23.4771	24.3193	-1.3908	65.2172	-1.53674	2.30264	588.055	31.0121	983.327	1263.44	9.06382	172.872	0.774282	209.592	10.4392	64.0778	148.352	12.9073	1023.1	37.457	-1.53206	-1.05585	1.06619	-1.66758	21.8941	40.5553	58.1201	20.2664	237.303	161.079	67.5166	56.6762	29.197	53.08	12.5131	170.099	NA	258.634	125.07	212.13	215.296	23.2433	22.2765	53.8911	-3.11762	4.90977	-2.24136
Furlong.Iso1_tin_Embryos-6-8-hr	-1.56213	-1.97761	43.452	14.8159	-0.841394	73.9819	-1.2685	-1.40762	512.282	28.7637	810.844	1299.52	3.7139	164.31	1.015	158.456	7.88992	43.9981	131.314	11.6867	1038.26	50.6187	-1.54022	0.433476	9.92109	-1.1988	26.6328	43.5378	155.093	32.7041	279.936	294.217	166.236	135.126	109.343	127.167	54.0438	208.161	258.634	NA	46.5999	90.8385	107.963	19.5345	19.0161	13.1954	-3.2748	1.33138	-3.88953
Furlong.Iso1_twi_Embryos-2-4-hr	-1.57763	-1.90565	13.7457	70.2006	-1.9196	144.401	-1.3	5.42691	1012.04	95.8317	1290.41	1932.71	31.8221	365.38	23.9423	388.183	36.2787	105.867	403.343	50.7871	1624.34	17.2495	-1.67778	-1.67941	-1.04827	-1.71326	16.215	38.6944	35.3102	14.1303	159.083	79.7454	30.4471	15.9253	17.3529	20.4453	7.42993	92.7154	125.07	46.5999	NA	140.768	128.634	7.59747	30.0582	50.0583	-2.30589	1.32987	-2.8823
Furlong.Iso1_twi_Embryos-4-6-hr	-1.71089	-2.47177	25.0448	25.7138	-1.7839	72.1787	-1.44546	0.856449	683.092	24.7819	999.301	1392.22	9.0637	155.971	0.23611	218.692	6.94926	60.5223	156.639	6.75552	1439.96	29.9465	-1.21972	-1.10354	0.737394	-1.60341	17.3558	52.7745	48.4241	14.8694	227.374	131.886	54.0283	35.7498	22.1385	36.1169	9.83359	118.484	212.13	90.8385	140.768	NA	256.734	28.6112	109.558	113.687	-2.51953	9.77819	0.235593
Furlong.Iso1_twi_Embryos-6-8-hr	-1.23675	-0.837833	41.4289	14.7296	-1.42897	48.3358	-1.41049	-0.330598	554.165	15.4382	823.903	1345.36	2.51404	127.345	-0.622882	126.601	2.80853	44.0478	122.544	3.87677	1418.53	38.3295	-1.05124	-0.634776	3.88449	-1.27032	23.331	75.0709	128.161	23.4533	217.711	250.746	137.563	63.9142	46.3019	59.3479	22.3581	98.1397	215.296	107.963	128.634	256.734	NA	20.7658	88.1342	44.6575	-2.89174	9.03606	-0.325524
Hr46-GFP.TCF-nonISO1-0-8_pan_Embryos-0-8-hr	20.6065	102.509	135.482	11.331	3.01816	43.303	-0.464792	1.36868	602.056	7.69461	852.627	2579.04	4.41546	71.1044	-1.15437	60.0534	-0.652714	25.6012	136.412	1.71014	1150.95	31.9178	7.62491	1.73828	8.5261	-0.351149	37.4675	44.135	78.8029	-0.361121	31.9174	37.7303	19.3591	10.1182	43.5183	28.9873	5.00691	14.2206	23.2433	19.5345	7.59747	28.6112	20.7658	NA	28.5998	-1.5718	-3.22019	-0.345818	-4.32573
Hr78-GFP.Hr78-GFP-8-16_Hr78_Embryos-8-16-hr	36.8073	45.4311	304.417	52.2123	63.7451	62.5867	218.327	-2.8313	1890.01	6.3194	668.024	7894.26	22.2115	151.722	-0.692648	87.8343	-1.35913	49.4563	212.73	6.22519	1563.56	83.0795	603.266	2.47168	19.5206	1707.36	59.4802	1274.16	269.593	3.62753	76.1645	238.251	73.9868	13.3912	132.039	28.0178	5.00299	4.70743	22.2765	19.0161	30.0582	109.558	88.1342	28.5998	NA	275.822	-2.54846	-1.81564	-3.79889
Hr78-GFP.Hr78-GFP-W3L_Hr78_W3L	3.05295	2.38113	164.641	-0.207165	18.7475	63.7228	209.416	0.849472	1022.94	11.125	883.791	5307.35	-0.416745	289.929	-1.86217	132.282	2.84259	15.9683	155.204	4.21325	1167	121.867	673.702	61.2529	106.722	147.779	64.0037	825.85	185.727	7.99522	63.5174	247.262	143.884	12.1073	49.8386	19.1701	15.0685	0.772242	53.8911	13.1954	50.0583	113.687	44.6575	-1.5718	275.822	NA	-2.28833	-1.30937	-3.32162
Iso1.24_modmdg4_Embryos-0-12-hr_ChIPchip	-2.81109	-4.06934	5.23173	-2.55244	-3.00755	-1.04791	-0.818759	-3.26696	87.8893	-3.55337	64.7284	391.588	-3.34652	8.51162	-3.7112	4.31013	-3.4067	-2.33932	5.85543	-3.30369	129.206	4.13799	-2.39837	-3.22351	-3.81427	-2.39494	-2.04386	36.5541	1.51599	-2.93975	-0.412995	5.45077	0.834577	-3.01675	-2.48151	-2.97874	-3.39891	-3.47113	-3.11762	-3.2748	-2.30589	-2.51953	-2.89174	-3.22019	-2.54846	-2.28833	NA	14.552	23.8867
Iso1.2558_HDAC11_Embryos-0-12-hr_ChIPchip	-2.62283	-3.69112	55.5087	-2.03035	-3.22627	17.311	-2.75795	-3.38188	279.589	-1.60218	215.861	802.343	-3.16218	29.5437	-3.64105	24.4745	-3.22141	5.77585	26.0495	-2.34816	346.698	8.41196	-0.947566	-2.31942	-0.0355684	-1.99162	0.892359	69.3522	13.9634	-3.02155	8.85408	20.7021	8.37508	-0.873348	2.70037	2.58437	-2.24391	0.0384841	4.90977	1.33138	1.32987	9.77819	9.03606	-0.345818	-1.81564	-1.30937	14.552	NA	92.2996
Iso1.2559_HDAC1_Embryos-0-12-hr_ChIPchip	-4.65534	-6.16398	3.69297	-5.32638	-4.72364	1.98536	-3.72991	-4.1604	239.971	-4.06613	104.082	595.299	-4.85492	18.3631	-4.46272	5.70524	-4.38782	0.247448	14.3381	-4.81022	233.714	6.2799	-3.65494	-4.17931	-4.14942	-3.40919	-2.17021	70.1513	1.28327	-3.97145	1.24747	6.82233	0.346282	-4.69004	-3.03737	-2.44018	-4.62249	-4.66337	-2.24136	-3.88953	-2.8823	0.235593	-0.325524	-4.32573	-3.79889	-3.32162	23.8867	92.2996	NA
Iso1.2560_HDAC1_Embryos-0-12-hr_ChIPchip	-4.04565	-5.97851	1.20613	-5.40779	-4.70404	1.49711	-3.65312	-4.12621	220.416	-4.08743	93.6313	614.463	-5.01775	16.3019	-4.92826	4.53479	-4.31616	-0.108283	14.187	-4.91958	233.86	5.06802	-3.52694	-3.83476	-4.80122	-3.60622	-2.57383	67.8105	-0.230064	-3.8872	0.424038	4.99056	-0.897865	-4.82123	-3.59835	-3.14865	-4.68362	-4.71781	-2.57189	-3.83722	-3.42597	-0.568281	-1.0615	-4.34908	-3.89679	-3.24307	20.339	94.0118	411.908
Iso1.2561_HDAC3_Embryos-0-12-hr_ChIPchip	-8.22275	-10.6852	-15.0949	-12.1304	-8.98323	-11.9493	-7.36065	-7.66291	-3.45316	-10.1165	-12.262	26.6006	-7.98608	-14.7118	-7.5985	-13.4272	-8.16126	-11.4127	-12.9938	-8.37221	-2.30456	-10.7143	-7.38835	-8.37263	-10.4932	-7.2439	-8.76226	-12.5685	-14.3207	-7.73896	-12.4836	-13.9643	-13.3095	-9.47086	-11.8029	-10.2418	-9.16573	-9.64706	-10.7198	-9.85718	-11.442	-12.1157	-11.501	-8.26478	-7.37584	-7.74046	-16.1751	-15.1366	4.95714
Iso1.2562_HDAC3_Embryos-0-12-hr_ChIPchip	-8.63051	-10.8703	-15.4664	-12.3563	-9.71406	-12.8683	-7.38255	-7.41127	-6.37972	-10.8947	-14.9031	19.9365	-8.46218	-15.8722	-7.83836	-15.2288	-8.86372	-12.2269	-14.1263	-8.75139	-5.41824	-11.9682	-7.57353	-9.0614	-11.049	-7.31384	-9.53947	-13.9965	-14.657	-7.86277	-12.5055	-15.0338	-14.1267	-9.3885	-12.2429	-10.6963	-9.67553	-9.71613	-10.9807	-10.4971	-12.3398	-12.6812	-12.4219	-8.2928	-7.51491	-8.10603	-17.2011	-17.2161	1.09911
Iso1.2563_HDAC4a_Embryos-0-12-hr_ChIPchip	-3.73579	-5.07637	17.9394	-4.59195	-4.39782	3.26168	-3.25103	-3.96344	135.246	-3.19538	88.9706	435.012	-3.96516	8.88827	-4.23714	8.75891	-3.64819	1.45214	12.3861	-3.53131	182.26	-0.969227	-3.35178	-3.58148	-3.59468	-3.4823	-2.52432	26.4504	0.835206	-3.47723	-0.177064	3.48397	-0.660117	-3.03107	-2.48239	-2.6819	-3.88004	-2.4778	-0.920368	-2.44817	-2.53003	0.482538	0.474955	-4.13467	-3.3769	-3.50464	29.9092	166.945	211.362
Iso1.2564_HDAC4a_Embryos-0-12-hr_ChIPchip	-2.81885	-4.05194	14.7065	2.15011	-3.28806	15.2877	-2.75494	-2.77345	343.444	4.39968	281.037	921.076	-1.83938	50.3341	-2.73572	47.6822	-1.95773	8.92818	36.9978	-0.361029	430.626	16.9415	-2.75446	-2.72017	-1.84385	-2.90611	1.26315	67.9038	13.8056	-1.33397	15.7344	25.3427	12.0234	-0.513628	4.32551	1.92903	-1.96099	1.13047	8.30555	2.43973	7.26012	12.6414	11.0283	-2.53248	-2.83805	-2.55418	66.8235	155.615	337.156
Iso1.2565_HDAC6_Embryos-0-12-hr_ChIPchip	-3.02633	-4.54611	2.59842	-3.97712	-3.43224	4.74925	-2.93143	-3.2438	306.586	-2.53658	98.9616	885.583	-3.75878	12.8064	-3.51709	4.16663	-3.73931	5.19372	19.5176	-3.53506	263.458	3.91552	-1.83192	-3.22509	-3.5899	-2.35152	-3.16368	121.793	1.02117	-2.56431	-0.884464	5.05026	-1.04709	-3.73703	-2.59634	-2.31227	-3.78003	-3.95993	-3.88169	-3.70467	-3.37161	-0.686261	-0.500457	-2.60845	-2.02538	-2.14901	39.9345	213.518	612.922
Iso1.2566_HDAC6_Embryos-0-12-hr_ChIPchip	-1.90913	-2.8568	11.6505	-1.71682	-2.92033	13.7679	-2.38697	-2.48325	492.175	-0.470651	131.285	1382.6	-2.43631	23.5098	-2.85452	10.4479	-2.62852	13.0753	26.09	-3.1604	444.62	10.0951	-1.91068	-2.32574	-2.35186	-1.8836	-2.45897	168.422	9.43541	-1.66896	3.03089	14.2939	4.7079	-2.66977	0.738525	0.301149	-2.38502	-3.21434	-1.83456	-2.27643	-1.48908	2.8832	3.30897	-2.03122	-1.88899	-1.39554	59.902	340.544	885.186
Iso1.2567_HDAC11_Embryos-0-12-hr_ChIPchip	-0.845968	-1.39001	14.1839	1.03321	-1.55023	17.2138	-1.19906	-1.37035	454.414	4.58992	271.271	1519.43	-1.22713	40.5281	-1.98069	17.1877	-0.24824	11.1891	40.5535	-1.33659	509.997	15.0824	-0.894437	-1.15002	1.88	-1.24389	1.26095	122.569	14.4159	0.670901	13.816	22.0863	12.71	1.56284	6.07931	0.529423	0.775056	0.574157	5.33758	-0.0770821	3.85158	9.58189	7.09526	-1.34973	-1.25289	-0.558179	85.4039	546.367	987.546
Iso1.2569_sbb_Embryos-0-4-hr_ChIPchip	-2.45275	-3.02399	2.48598	-3.54728	-2.58578	0.214783	-1.96239	-2.9091	18.5582	-3.44014	55.6332	204.738	-2.55229	2.34899	-2.60855	4.83129	-2.77514	-3.18668	10.003	-2.90914	122.61	-1.66115	-2.12651	-2.71785	-2.95518	-1.96445	-2.4786	-3.51067	1.80891	-2.60101	-3.60854	-1.84963	-2.18726	-2.65384	1.06437	-2.45419	-1.77784	-3.09192	-3.00558	-3.20262	-4.39544	-2.75694	-2.91466	-2.25424	-1.50918	-2.76357	14.1384	-0.262325	3.28514
Iso1.2570_cad_Embryos-0-4-hr_ChIPchip	-1.36738	0.922685	-4.71778	29.4052	-1.94152	25.3577	-2.51252	1.47367	109.286	14.7361	174.865	427.504	5.33892	44.5861	7.64165	33.6221	5.57256	6.9104	160.911	10.4849	296.923	-0.540613	-2.08395	-2.02287	-1.96601	-2.08484	-2.14795	11.9491	-2.33322	-1.71245	-2.20427	-0.496383	-1.61447	-2.3509	-1.98688	-2.45779	-2.50332	-2.36419	-2.7929	-3.14509	13.8434	-2.59463	-2.40281	-0.681297	-1.89146	-1.7467	9.2918	-3.79355	25.5213
Iso1.2571_D_Embryos-0-8-hr_ChIPchip	-1.72943	-1.47396	44.6494	39.6492	0.25695	127.655	-0.780984	1.5729	1090.59	55.7306	874.642	2436.28	23.1537	272.159	6.97006	325.549	35.8058	99.8246	253.004	24.1581	1485.26	33.8012	-1.18971	0.128123	1.26222	-1.30604	6.01157	101.22	21.7675	2.21101	39.4601	35.5843	12.385	4.51676	14.7565	11.4273	2.28712	29.7205	46.7094	17.6563	84.1825	55.4926	24.4945	-1.56129	-1.4105	-1.0538	100.166	158.673	645.968
Iso1.2572_disco_Embryos-0-8-hr_ChIPchip	-1.13542	2.16536	44.3301	47.2167	0.280853	151.678	-1.36695	0.685926	1227.59	48.3147	1331.02	2771.31	20.5097	311.922	9.18699	301.509	22.1472	96.8169	146.613	24.4811	1862.4	74.7985	-1.35364	0.738771	6.58855	-1.29528	13.9065	118.166	49.9733	4.63966	84.7935	71.0724	35.6766	12.3947	24.6094	31.183	8.69182	37.5502	88.4168	32.9635	67.7645	100.56	60.5155	1.01391	-1.051	-0.258413	113.456	170.987	710.419
Iso1.2573_GATAe_Embryos-0-8-hr_ChIPchip	-1.3109	-1.34878	30.2567	4.46957	-1.00397	23.7021	-1.3038	-2.53792	266.577	5.0398	294.376	992.391	-0.579278	50.2804	-1.77742	46.9998	-0.476698	11.9493	54.9026	-0.750752	419.041	21.9834	-1.12869	0.0780212	1.19779	-1.46976	0.828213	42.2595	19.5838	0.178963	16.5343	24.3291	14.0903	2.56923	10.6681	8.81816	3.11338	5.63644	14.8775	7.77141	12.806	11.0109	9.00775	-0.923538	-1.22813	-1.7561	85.2528	60.7812	279.747
Iso1.2575_hkb_Embryos-0-8-hr_ChIPchip	-1.90426	-2.81702	8.28154	7.26638	-1.73582	24.081	-1.43154	-2.27596	420.344	9.62067	393.028	1370.07	-0.430918	75.0168	0.109834	55.1405	1.41602	19.5253	77.958	4.41052	722.682	20.6163	-1.21181	-1.48534	0.658438	-1.75759	1.76406	44.654	13.9376	-1.15806	19.947	23.5761	8.78648	1.15236	4.59135	2.57805	1.54766	5.46937	14.8648	7.94777	19.0632	13.9121	7.88688	-1.13432	-1.45556	-1.78608	72.3975	74.9067	341.524
Iso1.2576_jumu_Embryos-0-8-hr_ChIPchip	-1.94692	-2.26927	-1.78638	0.592674	-1.80463	6.12834	-1.28326	-1.93886	480.421	9.66499	317.228	1439.01	0.0254874	31.4541	-1.90055	40.8568	-1.42379	12.5456	72.8507	-0.901855	614.79	15.793	-1.77535	-0.615446	0.780888	-1.77931	-0.209062	70.7921	10.9805	-1.70835	10.3521	6.92482	5.46105	-0.151127	0.661366	0.218959	-1.26823	1.06588	3.96587	0.962164	9.41786	4.65802	3.27027	-2.33941	-1.43194	-1.32181	93.7158	77.8868	642.429
Iso1.2577_sens_Embryos-4-8-hr_ChIPchip	-2.12328	-2.75373	-4.72319	-3.1871	-2.75146	-1.90224	-1.47402	-0.836896	340.465	5.75452	234.209	1098.54	-0.943965	20.4093	-0.843572	30.4977	-1.34244	6.11419	86.4488	-1.65689	412.323	5.3999	-1.95089	-2.44166	-2.37024	-1.96156	-1.32997	47.7477	0.609725	-1.12632	3.40625	0.784324	-1.7186	-2.28156	-2.78171	-0.911132	-1.9731	-2.2459	0.367415	-1.52953	6.25072	0.513807	1.79142	-2.17172	-1.90706	-1.37851	43.8601	20.2072	497.416
Iso1.2585_Ez_Embryos-8-16-hr_ChIPchip	16.3185	7.81309	353.643	26.1913	1.81218	65.3078	4.38995	0.729405	2372.73	24.8834	1279.94	7451.13	6.1845	275.118	-1.49277	162.18	-0.994261	44.4001	221.724	6.75585	2447.85	176.897	1.45594	21.2803	34.5909	2.51882	39.9183	779.242	129.729	10.3986	113.289	221.521	130.82	18.9867	65.7413	32.216	20.555	11.0618	82.1182	46.1715	62.0452	90.1199	66.2455	19.6999	0.760225	4.23378	652.245	1400.15	2929.11
Iso1.2602_modmdg4_Embryos-8-16-hr_ChIPchip	-0.518129	-0.550229	65.7309	10.3149	1.67679	33.4402	32.4038	-0.987996	467.352	5.42408	348.049	2215.44	0.398331	68.4883	-1.26697	36.3836	-0.994543	6.54144	69.9365	0.269784	650.432	67.3588	0.288	2.00266	6.47164	-0.444934	5.36551	376.076	66.2437	1.02195	47.1766	100.906	60.895	4.97808	11.0149	6.40788	0.658395	2.3337	8.06522	3.8351	11.3061	6.4071	13.229	-0.0284694	0.878384	12.1302	1748.18	120.943	585.141
Iso1.2603_Ez_Embryos-1-6-hr_ChIPchip	-1.75407	0.0519677	28.3277	189.867	0.655136	241.905	-0.738657	12.1578	1541.3	196.005	1434.11	2810.12	96.4431	535.512	64.3848	752.073	102.618	177.974	671.486	109.154	2035.84	24.9964	0.00229177	0.102219	4.68402	-0.978491	10.674	47.7812	19.4817	5.6478	65.093	31.7648	17.2425	5.30205	9.84326	8.85009	0.81791	58.9747	61.1141	23.6097	197.029	91.7334	19.3677	-1.46969	-0.92905	-0.667456	40.143	118.715	186.035
Iso1.27_SuHw_Embryos-0-12-hr_ChIPchip	-4.8926	-5.5835	-8.0516	-6.65357	-5.10774	-7.83618	-3.5966	-4.19787	-3.84224	-6.27088	2.21419	85.2703	-4.97417	-6.37017	-4.46927	-8.42559	-5.16942	-7.75495	-8.47051	-5.52961	23.6828	-6.42593	-4.11006	-4.97544	-6.35183	-3.75378	-5.32149	-8.41605	-7.81453	-4.35927	-7.56252	-7.11417	-7.67224	-5.34127	-7.17507	-6.38764	-5.2541	-5.32641	-5.76834	-5.79512	-6.99716	-7.15299	-6.70531	-4.08096	-3.82168	-4.19401	85.6397	-10.7306	-4.00081
Iso1.597_gro_Embryos-0-12-hr_ChIPchip	-0.867754	0.050831	128.173	28.8831	3.1548	209.938	-1.45245	-1.51651	518.258	28.9994	749.052	1345.1	7.32633	132.979	3.86634	160.162	4.99038	74.0373	96.8608	15.4847	931.083	20.6788	-1.11689	0.105221	6.31969	-1.39728	10.4559	24.3781	73.9264	6.0279	71.6275	104.049	98.5648	44.3964	52.8624	53.2593	29.4124	47.2304	99.7344	110.685	48.0888	86.9523	106.274	2.82453	-1.06626	-1.05913	8.11522	417.094	117.279
Iso1.601_Snr1_Pupae_ChIPchip	0.571559	4.77981	176.753	-2.64073	0.0957589	48.2928	9.76672	-4.97303	1084.36	5.25958	510.307	3876.75	-3.76373	129.405	-2.43831	66.7892	-2.09966	18.7271	82.1445	-2.55431	1024.49	79.3795	166.737	7.2989	28.4054	100.69	1.9732	430.134	105.547	-3.29894	14.8407	77.6232	40.7996	-1.11533	25.2058	9.71826	-1.54987	3.31514	24.7855	2.60093	4.81264	49.9182	7.79278	-1.08936	98.6127	150.579	74.421	1388.97	925.154
Iso1.602_brm_Pupae_ChIPchip	5.88092	8.4572	292.265	13.0308	10.5258	101.37	1.45548	-0.557539	950.264	8.67262	628.663	3481.39	0.963864	110.11	0.613286	73.9302	0.464696	22.3311	62.1711	5.27464	1240.04	62.4469	0.919207	19.9325	82.7113	-0.641006	18.3983	228.403	56.048	-0.375466	32.5231	96.8619	81.666	16.7205	50.027	8.89714	12.0167	8.60476	6.96725	13.285	16.8298	26.8781	31.5363	0.202638	0.431225	10.2632	191.711	1400.88	896.545
Iso1.603_Ubx_Embryos-3-8-hr_ChIPchip	-0.930725	-0.973393	137.12	-0.794772	-0.814524	453.661	0.290379	-0.450724	1919.12	27.2667	550.01	8357.18	5.74013	384.703	-1.70105	218.581	-1.25557	69.9967	183.854	12.0284	5128.56	100.311	5.96503	-0.702417	-1.39817	-0.656001	30.3718	1491.15	52.4929	4.94763	50.1173	285.825	78.9024	24.0387	72.3588	25.4922	0.740414	5.17133	40.6599	57.961	25.9074	171.513	123.59	-0.569978	-0.596455	3.9838	490.709	2148.24	5465.2
Iso1.604_zfh1_Embryos-0-12-hr_ChIPchip	-1.23841	-1.94346	165.907	5.7103	-0.338093	42.6823	0.468022	-1.79591	533.226	10.307	307.479	1658.52	-2.2841	118.022	-1.31103	33.7568	-1.76297	19.0135	45.1853	-0.271783	711.491	48.9014	3.67765	1.21288	3.84614	2.74089	14.8631	187.645	54.6058	3.181	55.281	91.7588	67.2224	9.85656	34.8707	20.7605	9.57281	7.757	27.6564	17.9302	24.7244	36.9177	27.6119	-1.18366	1.20435	10.4481	257.742	197.74	371.078
Iso1.606_DLL_Embryos-0-12-hr_ChIPchip	-9.52221	-0.395873	1842.71	-0.656598	-0.169333	1736.44	-1.83642	-0.314741	4168.82	230.356	2584.7	15467.7	-2.26971	1049.08	-0.521437	1116.6	-0.5725	-0.676698	-1.37847	68.6738	6010.21	403.019	-0.350218	149.41	546.389	261.14	-2.12297	1688.47	2218.7	-8.98469	536.988	1543.23	614.932	217.428	1054.25	-0.669742	58.8889	-2.48762	10.2576	17.9603	213.677	114.922	1723.44	-0.693592	-0.946771	730.353	837.985	7100.52	5728.39
Iso1.607_CBP_Embryos-0-12-hr_ChIPchip	-5.16976	-6.24821	-8.68762	-7.0006	-5.30398	-5.82957	-4.36432	-4.27327	15.2219	-6.23707	21.3273	111.353	-5.56995	-6.71088	-5.24967	-5.45371	-5.02529	-7.03389	-4.08524	-5.35931	49.2646	-6.89369	-4.36337	-4.74117	-6.43992	-4.11996	-5.45157	-8.76886	-8.30252	-4.574	-7.49685	-8.60105	-7.62835	-5.32726	-6.93348	-5.78403	-5.32817	-5.93714	-6.96185	-5.75862	-6.49548	-7.57828	-7.01979	-4.60837	-4.27004	-5.11963	-6.72329	-6.14764	6.46489
Iso1.608_chinmo_Embryos-0-12-hr_ChIPchip	-6.39742	-8.18553	-13.7155	-10.5416	-7.71428	-11.1345	-6.25856	-6.01568	-11.1593	-8.59813	-3.94117	14.8802	-6.59724	-12.8198	-6.55072	-12.1246	-7.38459	-10.0156	3.04784	-7.1886	4.06671	-10.4716	-6.5633	-6.94615	-9.44317	-5.7803	-7.66533	-14.1844	-12.4953	-6.31357	-11.1183	-12.8159	-12.7196	-7.68785	-10.4063	-8.78762	-7.91017	-8.36935	-9.60079	-8.82323	-10.2386	-10.8325	-10.4978	-6.59884	-6.1085	-6.5685	-14.2853	-16.9876	-13.7866
Iso1.610_gsbn_Embryos-7-24-hr_ChIPchip	5.44387	1.00188	197.691	4.80746	0.717735	32.736	-1.06792	-0.696495	611.456	3.77651	377.872	2424.67	-0.998236	58.0729	-0.97534	29.2372	0.738991	19.4284	45.4907	0.441844	650.703	94.6518	-0.0507182	3.37984	9.73918	-1.05646	4.1149	182.076	172.289	10.7256	78.6352	173.501	145.676	9.92314	26.5887	10.3518	2.48886	5.40916	17.4812	10.7249	13.7382	19.0276	6.81369	9.6175	0.181997	1.69926	108.144	554.935	572.192
Iso1.611_en_Embryos-7-24-hr_ChIPchip	-1.55161	-0.842064	57.1214	33.4798	0.753185	59.1092	-0.739593	-0.917596	455.03	34.449	518.129	992.573	10.9573	51.4198	2.44101	122.068	8.53591	34.9725	125.017	9.68334	684.389	21.444	-0.0314358	-0.706445	1.95069	-0.473536	1.32957	23.3828	27.5397	3.85771	22.5169	27.7775	27.3093	11.5345	9.87339	13.6339	0.943604	10.8034	24.5047	17.8915	28.4723	31.7489	8.69992	4.31846	-0.16014	-0.198157	7.07794	240.271	99.1704
Iso1.612_Ubx_Embryos-3-8-hr_ChIPchip	2.21277	1.71141	5.14887	-1.59272	4.73926	64.8412	-0.576696	-0.796337	2071.41	2.76996	562.216	5986.92	-0.611388	60.0397	-0.985488	5.06581	-0.394216	66.808	60.5698	-0.916964	1980.08	40.7786	-0.701374	-0.46895	-0.830775	-0.505428	-0.444961	482.838	-1.34155	-0.5096	10.1958	19.3527	16.2908	16.3797	21.0601	33.2198	-1.19997	-1.27499	2.36497	11.1966	4.25859	-1.13716	13.3903	-1.81106	-0.337655	-0.80643	329.931	830.061	3968.69
Iso1.614_Ubx_Embryos-0-12-hr_ChIPchip	1.48867	-1.42885	80.9111	9.39918	1.76177	164.977	-1.49435	-1.51506	1145.9	5.10397	252.144	2898.15	0.861184	97.2863	-0.968012	41.0339	0.457296	35.7014	71.251	0.167474	1022.76	47.5357	8.14839	0.140442	1.96172	2.52902	0.83109	415.236	38.5091	0.485654	34.2219	79.5328	49.0323	10.137	27.8046	11.3671	5.75307	7.03201	14.7512	21.9073	5.60111	29.8191	32.3691	0.615846	4.14272	7.57158	122.938	714.531	1429.58
Iso1.615_ttk_Embryos-0-12-hr_ChIPchip	0.447833	0.768771	80.4457	3.54013	1.99885	21.0368	1.72281	-0.813992	856.98	5.26151	211.666	2905.44	-1.35986	39.1609	-0.184547	8.81372	-0.945321	21.9396	34.6979	-1.03686	740.372	40.689	-0.037239	-0.114024	-0.00851329	-0.20166	0.245224	331.638	35.0489	0.626197	19.8843	29.3988	15.5413	4.58943	2.65585	0.868452	-0.85165	-1.73507	4.69957	3.72288	11.6095	18.6735	7.56354	-0.439258	1.19645	1.68259	378.352	419.381	1678.22
Iso1.616_Stat92E_Embryos-0-12-hr_ChIPchip	-0.439366	30.5845	112.212	480.586	3.3106	901.57	4.06196	9.2325	5338.8	243.481	5614.8	9851.97	178.717	1667.12	146.587	1388.9	201.982	240.772	1139.59	433.214	6292.38	343.682	40.6032	-0.68943	-0.666842	-0.347685	70.9029	344.871	253.108	39.6224	878.105	388.207	251.706	147.447	43.1106	234.092	75.0239	324.911	302.114	668.157	582.832	431.944	441.845	8.92581	9.13081	33.2824	104.97	1864.54	2814.98
Iso1.618_kn_Embryos-0-12-hr_ChIPchip	-1.57158	-3.25952	130.464	-0.037158	-1.85189	25.8929	-1.66897	-2.24379	414.551	-0.542833	184.885	1297.5	-2.10822	62.5286	-2.49216	3.38591	-2.3703	10.7724	17.7236	-2.14872	521.421	38.942	3.38771	-0.776819	2.76383	0.735859	3.77876	162.275	56.5324	-0.867868	32.2459	66.9867	40.7594	4.81501	25.706	10.3415	2.946	3.48034	11.2783	12.236	7.21382	28.0595	16.7025	-2.66821	-0.043749	1.79392	112.868	206.081	321.803
Iso1.623_gro_Embryos-0-12-hr_ChIPchip	-2.6265	-2.90206	35.857	14.4362	-0.869012	67.7527	-2.47749	-1.3713	231.255	11.4136	345.469	525.305	2.13888	75.2199	0.0488038	92.2481	3.28571	37.2285	54.1661	7.52367	441.406	5.03831	-2.37956	-2.31876	-1.87861	-2.43339	-0.0173252	-1.31658	31.1935	1.44202	37.403	34.4274	28.5401	16.4074	15.8128	17.7184	6.25628	25.9148	37.7513	32.5671	22.9939	38.2289	35.6798	-1.07678	-2.18916	-2.28598	-1.09185	97.0642	19.5664
Iso1.625_en_Embryos-0-12-hr_ChIPchip	-2.64196	-4.40926	1226.96	242.26	-2.64196	105.314	-2.64196	-0.187585	13829.8	-1.35386	4644.77	40435.8	-0.175318	425.558	-2.64196	342.545	-2.64196	4914.92	-0.528854	-0.571685	5933.93	149.812	-2.64196	-1.05225	-0.220399	-2.64196	150.53	3661.06	833.087	1.59404	155.071	3153.16	70.7792	-2.64196	2214.03	260.043	1012.76	-0.234275	-0.63016	383.579	-1.18562	98.1597	459.413	-0.12823	-0.509135	-2.64196	-0.370477	16485.8	27731.6
Iso1.627_cnc_Embryos-0-12-hr_ChIPchip	-1.02442	-1.38198	37.267	7.87124	1.60097	39.6525	-0.762175	0.276463	433.953	6.19425	225.937	1093.37	1.91009	66.8598	-1.65756	63.1152	1.74946	16.4777	86.5335	4.05172	584.735	13.2328	-1.0941	1.23021	3.32242	-1.49807	3.19456	39.1611	24.9414	-0.36772	15.9338	20.5662	8.01265	1.58215	13.1787	5.50483	1.65104	10.8405	22.7904	17.9004	12.8334	24.7008	14.4741	-0.846866	-1.00796	-0.250269	78.801	149.808	221.631
Iso1.628_bab1_Embryos-0-12-hr_ChIPchip	-1.34579	-2.17148	24.3787	35.6385	-1.00574	14.2001	-1.30487	-1.97214	165.216	0.150178	125.468	846.47	-0.183802	21.5675	-1.34289	16.256	-0.972811	4.56608	15.4347	-0.628597	249.356	18.8056	3.76816	-0.518658	1.4134	0.440165	3.38447	117.887	10.4682	-1.34955	8.2004	28.7416	10.6175	0.0186736	2.62224	-0.706525	-0.808681	0.266372	3.36516	-0.0701672	1.5122	5.6767	9.97896	-1.437	-0.0145207	-1.34993	376.684	60.9084	172.678
Iso1.769_CTCF_Embryos-0-12-hr_ChIPchip	-3.20403	-4.53161	2.24527	-2.45169	-3.27305	0.690806	-2.48249	-3.12483	61.9249	-4.15848	33.3289	316.758	-3.17713	2.95706	-3.49869	-0.543012	-3.83951	-3.67811	1.05164	-3.04491	98.9836	0.666098	-2.27241	-3.34112	-3.39829	-2.58029	-1.42486	22.6773	-0.839821	-3.12697	-1.69185	2.10471	-2.22736	-3.13895	-2.94447	-4.01835	-3.79982	-3.23568	-2.65864	-3.05499	-3.9269	-2.95096	-2.08279	-3.5873	-2.73678	-2.87045	101.431	20.6796	86.7669
Iso1.770_CTCF_Embryos-0-12-hr_ChIPchip	-3.11977	-4.4441	1.11439	-3.38768	-3.58613	-0.0578135	-2.52621	-3.1665	46.1336	-3.73303	35.4952	264.761	-2.84502	1.69381	-3.24521	-0.0919853	-3.10653	-3.5956	2.49212	-3.25905	91.3874	-0.299265	-2.28507	-2.89353	-2.95978	-2.46953	-1.24473	14.9014	-1.12904	-2.84788	-2.17968	1.28452	-2.22754	-3.12668	-3.24675	-3.70998	-3.43224	-2.73999	-2.44985	-3.02467	-3.37946	-3.10207	-2.46244	-2.87915	-2.74844	-3.21242	101.841	8.90209	58.4658
Iso1.898_Kr_Embryos-0-8-hr_ChIPchip	-1.5252	-1.92523	14.6962	43.2533	-1.43559	101.471	-1.75107	-1.12175	483.473	49.3244	610.078	1060.75	11.5242	212.849	12.2324	165.763	15.2739	60.5614	124.644	32.3024	838.086	16.214	-1.56716	-1.69058	-1.65183	-1.53125	2.84572	23.5702	5.35831	1.73168	21.0651	13.4443	3.45028	2.21564	5.72484	3.69214	0.341868	11.5484	22.5767	9.76536	31.8788	23.5678	11.8604	-1.0134	-1.62503	-1.524	26.5138	93.3627	102.888
Iso1.901_SuHw_Embryos-0-12-hr_ChIPchip	-5.4127	-6.93697	-9.76275	-7.79414	-5.74854	-8.78107	-4.48471	-5.10152	-10.8481	-7.86315	-6.59571	50.6299	-5.49039	-10.4816	-5.14104	-10.2646	-5.51116	-8.62737	-12.1176	-5.61808	4.96562	-7.91626	-5.41958	-5.84376	-7.20915	-4.73593	-6.28076	-10.9756	-9.77375	-5.21717	-8.59293	-9.32904	-9.08577	-5.90419	-7.39498	-7.3227	-6.34381	-6.69888	-7.77499	-6.23006	-8.4256	-8.88827	-8.42292	-5.76479	-4.50413	-4.9869	43.9667	-14.0599	-11.7394
Iso1.CG16778-0-8_CG16778_Embryos-0-8-hr	-0.785258	34.8816	373.04	501.64	84.7071	457.829	11.3944	-0.525719	8513.92	540.31	8360.08	18464.2	-0.685737	2297.47	-0.304086	2992.03	41.8608	100.404	134.405	48.8831	4273.58	1167.68	-0.510273	-0.782841	-0.899904	-1.15116	580.48	1942.61	770.466	212.34	978.519	1074.44	520.869	149.752	307.389	249.943	162.644	32.1271	296.437	426.619	208.05	632.114	250.446	-0.34782	-0.225686	21.7934	322.456	2012.97	2527.2
Iso1.CG8478-WPP_CG8478_WPP	2.15834	4.69097	99.0212	11.1777	8.07837	34.8513	20.7116	-1.3246	623.411	2.39107	666.514	2739.13	-0.31042	161.688	-1.37775	58.8188	-1.38048	4.91999	78.9344	-0.329926	985.069	82.9929	3.89851	33.2008	62.4086	5.53113	29.9701	172	85.3934	1.11127	40.0575	99.1244	65.1994	4.67163	21.6956	7.49489	2.19532	5.13675	26.5556	10.93	17.992	31.9225	41.2292	1.3748	4.26188	41.5592	115.476	194.844	597.377
Iso1.CNC-16-24_cnc_Embryos-16-24-hr	3.11378	4.31457	115.268	7.95901	15.7425	53.8672	1.79845	-0.857035	645.331	-0.140129	493.827	2156.03	0.114353	56.5355	-0.91338	56.1955	-0.854491	18.4602	121.529	-0.196212	827.587	48.1296	-0.366045	3.13129	23.0397	-0.551405	8.19799	118.221	49.067	1.11356	22.5354	45.1892	40.618	0.577703	36.0293	4.15441	3.9252	9.53711	11.72	3.60778	9.65365	17.1996	11.3852	0.492852	0.405002	2.17555	67.3852	203.258	634.75
Iso1.CNC-AdultFemale_cnc_AdultFemale	11.4303	0.457675	198.509	13.0249	30.7612	53.2767	3.55286	-1.01476	662.604	-1.97303	497.748	2591.14	-0.714366	79.3554	-1.00504	82.9591	-0.636791	19.9262	198.86	-1.60576	902.88	50.7386	-0.97549	6.28881	34.4377	-0.624545	5.80844	108.096	29.785	3.47042	15.2937	52.4082	12.817	3.38497	26.9697	8.445	4.14283	11.8835	8.09812	1.34855	6.48284	8.89711	7.95324	-1.24806	-0.0757206	1.68108	111.164	288.124	670.991
Iso1.CNC-AdultMale_cnc_AdultMale	-2.11956	-2.96197	30.9028	-2.53059	2.51578	6.94412	-2.05917	-2.74629	99.1903	-2.46003	89.5897	453.531	-2.83096	12.3154	-2.46442	7.60483	-2.74301	-0.232404	11.0634	-2.63266	166.175	5.51925	-1.89353	-0.174937	1.58098	-1.68759	-1.62247	19.4813	10.5743	-1.93957	0.342634	4.84958	3.12876	-3.07001	1.83256	-0.89961	-1.64492	-2.13543	-1.38807	-1.75386	-1.8943	-0.283678	-1.50451	-2.35462	-1.78517	-1.18382	21.4955	46.5135	118.421
Iso1.CNC-WPP_cnc_WPP	56.9385	17.5894	492.242	-0.984138	59.6679	308.569	-0.424077	-0.212619	2803.73	-1.21774	981.144	6618.06	2.09543	156.847	-0.187741	146.892	-0.95436	82.2177	393.596	-0.648417	2162.34	271.7	-0.524756	-0.619381	21.6561	2.22787	11.8982	690.389	70.878	4.43043	77.8249	61.0062	54.3657	12.4786	73.1803	21.8217	-0.59503	59.5444	37.6124	2.60839	63.1854	51.1699	55.8404	-0.376895	6.46898	1.34127	191.294	1346.97	3856.44
Iso1.Dll-WPP_Dll_WPP	-0.676305	7.03655	7.85503	3.87646	-0.549273	8.20586	3.94149	-1.29315	196.373	3.35718	330.428	1104.92	-1.95628	39.0729	-1.69446	49.1131	-0.300556	3.91557	61.8509	-0.891505	455.985	27.1604	-1.62407	6.74879	24.6109	-1.43189	5.23844	40.9448	11.0322	-1.65514	6.88515	27.5363	10.6839	-0.750692	4.30144	0.400945	-2.03443	1.58997	4.09366	0.580362	4.60168	6.79939	8.07429	-0.952584	-1.16415	4.7509	20.0373	69.1293	106.23
Iso1.Fru-0-8_fru_Embryos-0-8-hr	19.8248	16.9931	34.7987	1.43606	-0.839193	47.3192	7.38716	47.4175	1566.98	63.0888	1815.67	5182.81	8.31966	391.501	1.72238	208.212	8.81826	41.7327	383.764	6.80152	3297.41	126.146	0.761102	9.35698	18.8668	3.67068	28.5583	505.591	27.9854	3.291	107.98	176.969	101.87	7.82872	33.4702	15.6357	6.08362	38.4087	74.7894	66.443	56.5303	66.9658	49.8195	2.19708	0.943156	20.1056	133.784	245.887	1336.13
Iso1.Gro-WPP_gro_WPP	-0.77744	2.02302	30.9636	4.3246	2.82162	17.4559	2.54571	-1.937	208.09	0.0562893	250.251	889.191	-2.24573	38.2675	-1.78215	28.0224	-1.08312	3.54823	26.7945	-1.04667	280.429	24.9787	-1.55972	15.3364	36.3385	-1.19743	9.78978	41.0256	24.2712	-1.69137	11.1202	28.0473	22.086	0.835735	9.99828	4.41751	0.509656	1.35094	6.81445	4.06663	4.06984	7.79375	9.17529	-0.614617	-1.57817	3.90668	11.1319	108.01	107.009
Iso1.H-0-8_h_Embryos-0-8-hr	5.04744	31.9223	3.65734	5.87196	-0.472936	11.347	1.94463	13.235	462.862	19.8908	554.701	1582.49	7.37708	66.2349	1.66692	84.4052	3.27898	17.0334	254.458	5.71816	856.122	32.3416	4.20066	0.179449	1.18024	0.461597	27.5747	89.7692	6.063	0.0174972	30.2181	40.4798	12.9385	2.38627	2.04275	2.99059	-1.83143	10.7301	15.521	6.30516	20.4905	27.5704	29.6648	7.66282	1.96397	6.41493	43.5418	64.886	235.161
Iso1.HP1-8-16_HP1b_Embryos-8-16-hr	-12.9506	-13.1927	-16.2234	-16.0521	-11.4509	-17.0956	-12.2978	-11.2892	-18.5873	-16.2985	-19.081	-11.6344	-14.4568	-16.396	-14.9241	-18.0512	-10.9325	-15.1821	-14.3362	-12.3523	-16.1327	-14.8564	-10.6856	-15.3844	-16.6769	-12.9084	-13.0916	-15.5849	-16.2905	-11.6343	-15.8745	-17.9328	-16.2499	-14.6905	-15.4317	-14.7497	-13.5343	-15.0946	-15.0001	-12.7086	-18.5994	-17.1448	-15.0914	-9.94133	-10.6577	-12.1113	-16.8449	-15.5444	-19.3856
Iso1.Hth-0-8_hth_Embryos-0-8-hr	-2.30038	-2.9806	24.3901	42.9764	-0.318331	109.612	-2.21343	0.411573	473.356	26.6675	691.96	805.173	10.3749	122	3.40929	198.18	9.84756	63.3351	130.172	13.6417	730.004	12.4161	-1.85792	-2.31577	-1.01289	-2.11459	13.905	7.55609	25.9443	6.97336	91.4611	54.9327	30.5432	18.2116	10.0137	24.1748	4.63586	52.4975	89.4543	64.5338	67.1082	101.898	80.9468	-0.148695	-2.10467	-2.06909	2.19302	109.606	47.725
Iso1.Hth-8-16_hth_Embryos-8-16-hr	-1.16893	-2.23244	78.4139	22.4776	7.2748	108.463	-1.49758	-2.12845	132.925	0.17407	216.951	398.065	-0.858385	31.2558	-2.07798	62.5308	-1.27037	11.6431	27.4741	-0.307294	337.285	15.7317	-2.04031	0.306192	5.81266	-1.79344	1.93799	3.82423	91.925	2.21975	27.2176	54.1483	70.4065	20.7293	37.6957	33.6155	17.1157	12.2433	19.3097	26.4002	18.2098	26.0692	36.9709	0.13345	-1.33132	-0.836732	3.87501	91.6765	40.3368
Iso1.Myc-W3L_dm_W3L	-2.0692	-2.58586	22.7999	12.9374	-1.17557	7.91055	4.36696	-2.77555	260.917	-2.40771	121.29	944.119	-2.04863	18.7883	-2.97952	7.04287	-2.64189	2.78323	10.8771	-2.38603	294.44	10.2891	5.54492	-1.67539	-0.258095	1.5909	-1.08794	277.241	8.58048	-2.44173	4.35224	17.8183	4.22769	-2.34449	-1.94346	-1.68504	-2.48964	-3.30441	-1.23094	-2.60146	-1.17782	2.77092	4.38238	-2.09786	2.25373	5.6421	290.176	187.971	344.868
Iso1.Prd-RF12-0-12_prd_Embryos-0-12-hr	-0.602957	-0.889081	302.404	106.087	37.0841	79.3979	129.868	-0.821714	1822.82	52.3922	1452.16	9521.16	-0.644607	66.9316	-0.398622	236.392	-0.652432	24.9887	50.8038	-0.846947	2394.23	137.885	433.991	-0.844525	23.1106	37.9032	22.5129	2852	449.733	-0.300967	131.214	900.49	216.19	-0.807524	-1.49797	-0.973604	-0.737207	-0.912235	42.8581	-0.948023	128.226	69.3942	56.7874	14.5463	38.4435	86.382	6640.3	266.617	1045.49
Iso1.Prd-RF13-0-12_prd_Embryos-0-12-hr	-0.310333	-0.68101	1140.42	18.0638	-0.732325	571.933	9.39237	-0.198113	3949.9	432.749	2059.4	22059.9	78.6888	131.996	-2.86992	161.802	-0.41963	176.934	795.64	46.197	5869.72	-1.46914	246.087	-0.552577	10.7247	3.29222	4.73673	6510.99	1006.11	-1.03342	109.242	280.705	449.046	25.6991	182.415	123.854	30.0616	-1.00382	64.8776	21.2196	-0.210128	10.8763	360.617	-0.37826	3.15767	666.049	333.042	12350.7	8042.02
Iso1.Sin3A-Kc_Sin3A_Kc167	14.6727	-0.726976	32.0831	-0.678014	22.4455	900.177	15.6765	-0.902321	11161.9	-1.21769	2898.51	20548.8	-1.1002	808.041	-0.395782	156.703	-1.213	230.08	242.016	-1.64495	7557.07	700.012	88.0576	48.7063	64.031	966.622	14.8522	5698.54	345.601	-1.36608	300.624	668.613	164.957	-0.857554	211.752	140.962	34.2034	-0.901903	120.918	161.443	60.6285	112.75	329.931	-0.925178	44.2282	75.7261	1099.17	5704.56	10973.1
Iso1.Stat92E-WPP_Stat92E_WPP	1.56401	98.9693	179.313	140.006	85.7478	215.439	17.8111	11.5046	3129.65	124.045	3060.04	8703.68	59.3366	630.114	-0.41035	427.231	52.8053	76.7668	732.483	65.4959	3722.23	208.569	-0.734483	225.097	216.143	-1.1325	42.7487	273.561	191.358	31.1781	45.4524	185.497	159.162	12.6694	34.1755	12.9454	10.9764	11.3103	75.5039	103.338	189.617	70.5069	47.6029	4.0744	4.12252	9.55268	163.328	1000.04	1303.72
Iso1.SuH-0-8_SuH_Embryos-0-8-hr	18.2128	206.191	60.5175	121.096	-1.00823	359.197	33.8487	10.8105	3888.23	396.968	4661.36	8303.1	2.16165	773.928	166.215	1118.51	203.945	233.6	2153.24	198.203	5131.91	450.764	9.14039	-0.513337	77.4586	-0.40961	120.703	390.57	80.0004	137.609	1043.46	546.431	406.36	134.974	33.7088	112.058	-1.79752	662.161	602.861	678.679	595.658	797.001	844.491	52.4023	49.0782	-0.277255	60.0105	783.634	1451.01
Iso1.SuH-16-24_SuH_Embryos-16-24-hr	12.7394	40.7539	422.94	8.03099	26.8401	51.7265	36.7814	-0.400434	1753.26	32.3905	2026.56	10944.2	-1.23426	185.346	-0.349017	302.051	2.28213	75.4426	528.085	-0.400693	2331.94	221.76	41.3245	94.4409	80.494	473.038	71.2901	1155.14	238.515	42.7428	110.202	376.152	332.285	-0.589181	93.6239	6.08962	32.39	8.56417	145.554	16.186	157.156	125.541	162.925	12.8764	102.609	124.61	228.085	2139.84	1939.79
Iso1.SuH-8-16_SuH_Embryos-8-16-hr	-0.22359	-0.658996	1282.32	990.852	-0.518014	1467.4	-0.179545	-0.171159	4263.68	2095.64	6304.17	29737.5	-1.92944	2229.96	1542.58	1054.57	1015.54	270.168	2725.77	1083.51	7143.83	3075.92	-0.349193	55.1681	532.989	-1.81885	1293	1135.72	1650.67	257.104	1272.45	4348.33	3099.01	204.473	-0.471021	70.2315	-0.706679	899.818	1144.01	307.644	848.672	2502.96	1201.7	-0.32958	4.89109	32.9728	-0.998402	2964.29	3061.21
Iso1.SuHw-16-24_suHw_Embryos-16-24-hr	-3.87789	-4.62422	-3.6734	-5.58902	-4.17037	-5.91051	-2.19001	-3.84695	0.829855	-5.15838	5.07013	103.447	-4.30111	-5.04414	-4.12122	-7.36172	-4.30371	-5.83456	-5.83969	-4.06746	30.0553	-5.15663	-3.78995	-4.1933	-4.95402	-3.48925	-4.38138	-4.13375	-5.35005	-3.78634	-5.83699	-5.66845	-5.1525	-4.63907	-5.57697	-5.34157	-4.1466	-4.86449	-5.83727	-5.31148	-5.69463	-5.66179	-5.56938	-3.79023	-3.22798	-3.23312	122.944	-6.67801	2.86552
Iso1.SuHw-WPP_suHw_WPP	-6.81004	-8.66429	-12.7742	-10.5365	-7.64706	-11.6411	-5.98218	-6.04189	-18.4738	-9.42574	-13.0006	6.08296	-6.96555	-12.9754	-6.13704	-12.5073	-6.60748	-9.6093	-14.3221	-7.3884	-9.9767	-10.2901	-6.17936	-6.99887	-9.10472	-5.85142	-7.69195	-14.7824	-12.3246	-6.30251	-11.1542	-12.5543	-11.9525	-7.69687	-10.5191	-8.32226	-7.71401	-7.98208	-9.12527	-7.84157	-10.2149	-11.0212	-10.5293	-6.73049	-6.08134	-6.33213	7.88298	-18.7484	-19.9094
Iso1.TCF-0-8_pan_Embryos-0-8-hr	-1.56253	-1.61301	83.7472	28.7493	1.68917	108.641	-0.89839	-0.499537	449.281	28.3201	748.477	1548.19	5.11251	142.62	1.294	177.142	3.77964	61.9532	140.939	12.9294	1034.33	31.8664	-1.01452	-0.629988	3.88392	-1.04067	18.9095	60.6051	50.4625	8.26147	76.2894	62.5352	43.2341	12.3892	22.2752	29.7316	8.6236	44.846	71.9322	37.4128	65.9128	82.4382	50.4408	37.7046	-1.07311	0.299575	34.0413	388.863	194.603
Iso1.TCF-16-24_pan_Embryos-16-24-hr	2.18392	9.24733	389.605	9.67251	31.03	114.334	1.33064	-0.761467	480.72	1.60748	502.895	3448.76	-1.40731	93.3745	-1.12459	35.3629	-0.0836123	8.76121	93.7152	-1.22886	1018.33	69.4701	-0.240154	3.08193	31.6275	1.43709	6.77063	89.6346	149.116	1.05511	24.2508	70.0734	74.0834	20.2835	61.3227	25.4349	6.71462	5.86547	17.0378	19.8251	8.2319	22.6674	12.8869	172.662	0.870207	2.0115	123.471	1280.92	485.728
Iso1.TCF-W3L_pan_W3L	23.81	56.0781	272.146	8.24374	13.1541	41.1671	-0.599329	-0.920707	646.267	9.76984	590.024	3223.66	3.00729	65.3488	-0.709239	46.7546	-1.28721	4.35467	98.056	3.92079	1071.83	40.7575	18.0215	3.70476	15.4177	-0.0617857	22.6721	87.694	67.1503	0.807073	11.2771	23.9614	37.1075	3.33449	35.6207	9.67004	2.35083	1.05653	1.08661	5.4833	5.50941	5.71496	2.90183	307.907	6.61549	0.962458	103.875	1040.02	264.449
Iso1.TCF-WPP_pan_WPP	2.68939	5.69566	90.7395	4.10918	4.39777	27.0689	0.66843	-1.66574	247.558	4.64057	224.76	1239.93	-1.13633	45.3971	-1.40417	38.568	-0.695294	1.88127	33.6948	0.93167	279.328	17.9096	0.880729	3.33397	11.0129	-0.498083	6.46419	33.4605	28.9855	0.0515791	6.67645	22.8669	12.8575	1.97559	12.8761	6.54769	2.10158	-0.402254	3.74542	3.65102	4.59883	4.72014	4.76657	50.3262	0.138269	1.09051	37.9665	400.135	119.6
Iso1.Trl-8-16_Trl_Embryos-8-16-hr	-3.19021	-3.86226	18.536	-2.7254	-3.44264	1.99587	-2.51654	-3.66354	124.61	-2.79211	119.123	595.583	-4.583	21.305	-3.55399	9.56174	-3.88465	-3.12285	9.91406	-4.0438	191.608	12.4636	-3.25385	-1.03331	3.61899	-3.10956	0.918017	17.5219	13.1932	-3.48509	1.2666	9.6282	7.54895	-3.058	0.956502	-2.06769	-3.39962	-3.7862	-1.9547	-2.66554	-2.39804	0.187389	-0.559904	-3.3512	-2.87619	-2.3587	14.8938	37.6121	69.7523
Iso1.Ttk-Kc_ttk_Kc167	-3.17261	-3.23658	-4.16352	-4.88007	-3.4967	-4.3892	-2.85422	-2.28479	135.863	-1.85337	74.9255	552.338	-3.12655	8.17771	-3.93723	1.68605	-3.33375	-0.639955	38.3064	-3.61591	215.293	-0.0542086	-2.94338	-2.96457	-3.77157	-2.62912	-2.81194	22.2436	-2.49372	-3.25672	-2.24631	-2.38515	-2.15539	-4.23704	-3.46122	-3.18491	-3.43357	-4.45467	-3.43312	-3.80224	-2.2682	-3.21034	-3.55699	-3.14299	-2.82691	-2.69345	3.70453	16.8509	191.126
Iso1.Usp-W3L_usp_W3L	18.1771	22.1318	219.506	15.3414	35.15	44.1969	6.30442	-1.48312	317.568	4.89448	359.002	1885.65	-1.17114	78.6832	-1.24074	41.0654	0.457985	32.0301	57.5539	1.3545	652.715	79.8548	-0.599375	231.599	342.111	0.191254	39.8466	61.961	108.955	4.36022	34.1456	77.1537	108.966	7.0529	33.2965	25.6163	11.0739	5.42468	4.10493	18.7642	11.0112	13.5179	25.0249	9.90767	3.53097	9.72285	57.9035	435.135	363.933
Iso1.Yki-8-16_yki_Embryos-8-16-hr	3.9158	2.89319	172.918	17.4083	4.95118	61.6895	5.66282	0.628269	1159.26	24.4352	1097.35	4806.92	-0.648548	202.903	-0.76518	116.119	7.11027	24.2818	143.833	0.530106	1624.4	128.921	9.06219	28.8914	87.1307	10.3295	52.4632	421.931	159.558	1.9301	73.0274	145.518	145.406	9.51075	57.1964	25.5036	7.12581	13.0589	32.8756	21.1304	25.2899	40.022	50.1402	2.42847	9.96303	27.3456	195.096	416.761	921.434
Iso1.br-core-0-8_br_Embryos-0-8-hr	3.97341	41.7799	140.272	47.3045	31.1131	178.779	13.1946	-0.502778	2697.55	2.88106	2204.78	7469.56	-0.791112	171.937	-1.37594	179.183	-0.868009	79.3849	266.314	-1.04799	4530.47	39.0411	32.9707	7.04036	26.3443	12.3063	89.5574	1426.58	241.622	46.2123	175.493	1018.91	570.084	-1.18559	5.68292	33.9265	-0.440362	24.0299	8.22127	-0.667913	60.1202	83.101	145.524	8.51537	26.0818	31.8148	380.471	932.444	2221.14
Iso1.modMDG4-W3L_modmdg4_W3L	-1.15037	-0.606389	563.693	-1.21376	58.9829	-1.12148	423.216	-0.32419	340.852	-0.650097	118.512	5555.09	-0.495546	-1.51693	-0.283224	-1.50358	-0.876423	-0.989167	184.664	-0.782829	950.739	-0.999665	24.2305	-1.12106	289.6	-0.540381	58.2978	4479.71	119.435	-0.408091	-1.34795	492.989	127.373	45.3504	-1.13283	-0.945003	-1.16448	-0.472949	-1.05288	-0.311273	-0.593367	-0.741024	92.9326	-0.256656	199.66	1196.3	12166.1	342.093	64.6101
Iso1.psq-Kc_psq_Kc167	-0.881495	1.25836	280.313	7.47802	-0.886547	301.798	21.4337	-0.881222	2778.39	13.915	1497.62	9935.53	-1.24391	754.366	-2.38501	167.633	-0.829847	160.727	217.814	-0.870147	3295.27	460.186	3.60638	2.9207	91.3464	23.8469	77.3661	1286.23	296.891	8.06742	143.774	329.966	214.714	19.616	163.875	196.017	75.9383	9.1288	77.3127	59.0661	70.3809	134.855	86.4418	5.6766	1.19455	96.0321	340.423	1281.12	3264.93
Iso1.psq-WPP_psq_WPP	0.546633	1.29423	149.207	18.0085	2.30639	66.8627	3.04704	-1.84091	1005.41	7.00117	625.978	2932.68	-0.542042	323.728	-1.01329	61.2464	1.22727	39.1522	31.445	0.530737	978.034	163.783	-0.109082	26.5875	48.6307	1.1805	29.226	221.138	103.494	5.1469	53.5099	83.1879	49.8567	7.20883	35.0158	31.6876	10.527	8.35893	20.5452	16.0033	20.2959	50.2228	36.4894	-0.397706	0.279184	13.1531	80.9664	287.136	757.819
Iso1.sc-0-12_sc_Embryos-0-12-hr	215.783	871.352	294.354	-0.638389	-0.245226	1307.08	3503.5	303.292	21345.6	178.255	19042.8	38592.2	-0.731512	5390.26	-0.977105	1923.26	-1.02952	356.415	3180.92	432.95	30011.3	1162.87	4.27614	89.5742	264.173	3607.56	1430.83	3342.88	2621.73	2208.6	1407.02	3346.7	2183.36	653.607	1088.19	1303.24	2021.5	336.021	918.131	424.348	977.314	380.809	4437.05	-0.412689	6.58831	1.33541	1484.15	2780.01	12200.2
Iso1.sc-0-8_sc_Embryos-0-8-hr	-0.71082	-0.409446	745.757	2494.47	-0.352414	1162.59	-0.0722164	2.93907	18600	1854.24	9490.81	31276.8	-0.528098	5653.4	81.3879	3167.95	34.5937	4224.97	7068	-0.560695	28072.3	1324.22	33.742	-0.30672	1.5335	-1.87754	1443.65	3063.4	-1.29436	2.67885	2178.54	1452.29	736.886	-0.288633	908.923	994.471	263.929	2352.56	1611.87	570.64	2319.02	4806.47	1505.48	-0.319673	-0.426712	43.3061	291.995	4138.59	6304.78
Kc167.2568_Trl_Kc167_ChIPchip	-3.98665	-5.40898	17.0195	-4.98892	-3.99349	0.958729	-2.87924	-4.19201	88.0513	-5.08424	64.4062	423.344	-4.79864	10.8479	-4.57224	0.877151	-4.53773	-4.40713	-1.11696	-4.7747	139.882	7.08796	-3.99684	-2.02618	0.409012	-3.76236	-2.10027	16.2021	8.19699	-3.96684	-0.291957	6.20768	3.13772	-4.15975	0.100747	-2.8846	-3.68994	-4.53004	-3.11641	-3.59076	-4.30428	-1.6992	-2.24645	-4.01771	-3.59222	-2.92523	11.799	35.1278	79.1386
Kc167.908_CTCF_Kc167_ChIPchip	-4.02819	-5.0258	-0.405004	-4.37692	-3.54527	-3.23204	-2.88451	-3.90355	21.6677	-5.4662	17.9512	185.099	-3.85698	-2.39629	-3.62821	-3.66747	-3.66124	-5.08047	-1.96112	-3.71543	56.1524	-2.46123	-2.926	-3.56835	-3.98578	-3.0422	-2.66207	5.04769	-3.01444	-3.37686	-3.68773	-1.62291	-3.87641	-4.0926	-4.47619	-4.50581	-3.79418	-4.24805	-3.96804	-4.30334	-5.38017	-4.4145	-3.85386	-3.90895	-3.18894	-3.10131	62.2787	1.51513	27.4352
Kc167.H-Kc_h_Kc167	31.3814	59.3302	723.376	115.487	116.187	60.0116	116.004	-1.24675	1565.5	-1.21759	1281.82	9793.56	-0.788163	325.092	-1.39074	217.911	-1.66394	20.337	292.922	-0.730075	3346.72	61.9417	828.847	17.2131	113.264	99.6055	1749.95	855.076	72.0008	-1.32571	45.7642	389.757	34.7029	-1.20999	-1.94851	31.8132	-0.36899	2.25329	113.193	-1.09262	53.1218	163.599	63.191	56.6403	305.239	391.282	965.11	1307.98	1082.96
Kc167.Myc-Kc167_dm_Kc167	2235.56	452.147	-0.998903	125.603	-0.229747	269.534	-5.30633	33.0143	935.352	-0.528712	1701.81	6946.01	37.9328	113.865	-0.304868	-1.62393	-1.28514	69.4345	106.751	-0.530566	2550.58	139.342	252.275	39.2249	53.4803	-0.691217	108.481	265.425	-1.29109	-0.865884	-1.36168	-1.40286	-1.14017	-1.35835	18.2059	25.8761	4.72359	-1.16436	-1.17079	-0.987801	-1.27582	-0.999683	38.1394	1104.86	8.10078	-0.588184	417.892	5.03259	491.117
Kc167.SuH-Kc_SuH_Kc167	3.31283	1.46959	191.027	4.59912	5.61567	33.4622	15.344	-0.454262	495.891	0.6604	482.345	3387.37	-0.997742	95.3557	-1.77562	49.3604	-0.216381	12.1744	47.8509	-0.577181	748.846	87.3622	-0.528369	21.4846	63.1603	1.90659	20.3743	172.193	146.083	1.42688	41.3579	110.053	116.475	8.10119	44.6142	20.8164	6.22711	2.95794	17.1303	11.4697	9.93995	23.2226	20.5532	0.0759134	0.046564	20.0567	97.5503	244.918	473.033
Kc167.insv-Kc_insv_Kc167	24.8214	41.7504	335.59	31.6851	30.4835	5.16514	62.5029	-0.545742	1967.99	-1.4909	1025.59	13529.8	-0.614156	155.905	-3.06396	93.4804	-0.697283	13.8359	185.807	-0.537461	2093	221.764	22.8686	66.8283	259.054	11.8191	95.4797	1055.55	131.418	-0.490876	121.767	207.931	163.995	-0.892581	-1.83666	4.57599	-0.888069	46.6837	53.4404	79.3846	69.341	97.7617	102.266	60.3538	13.3091	169.835	500.767	543.699	2724
LolaI-GFP.LolaI-GFP-W3L_lola_W3L	24.7754	-1.04202	637.951	81.9266	133.203	235.797	1317.5	-1.85074	3499.77	-1.42258	2091.01	18160.5	-1.8663	868.158	-1.94735	289.207	-1.54588	149.672	690.444	-1.24643	4653.86	481.033	382.433	143.854	167.484	293.338	60.7538	1769.92	494.134	-2.26157	174.377	1030.31	704.402	25.461	94.7185	12.7936	19.9973	130.256	193.719	75.147	125.883	262.853	158.21	40.7244	14392.9	2861.71	1736.88	2955.29	5301.51
LolaJ-GFP.LolaJ-GFP-0-12_lola_Embryos-0-12-hr	13.6273	110.822	28.1849	-2.8231	10.1064	12.0974	-0.492674	-2.07844	93.2231	12.4355	177.958	1184.69	-2.20311	17.8782	-1.44257	7.12698	-1.49064	15.2412	37.9445	-1.43758	361.83	-1.65457	11.1522	2.48518	9.35539	0.0654576	31.4742	-3.58491	53.9499	-1.00466	-2.36446	6.51537	6.24499	-1.59978	7.97818	-2.20833	0.637571	-2.33559	-3.58164	-2.2857	0.133205	-0.0926872	7.53545	101.051	16.1072	-1.22574	18.0341	60.434	28.2887
LolaJ-GFP.LolaJ-GFP-12-24_lola_Embryos-12-24-hr	-3.19735	-2.90441	191.217	-4.4671	14.4926	39.6658	150.329	-2.81612	962.832	-1.235	385.182	3963.34	-4.94998	142.918	-6.0662	38.4405	-3.75717	-3.0575	46.795	0.224292	665.047	59.0816	298.103	-0.0624836	9.66983	702.347	21.6429	609.244	151.705	-1.97739	27.1878	86.1009	52.384	2.75579	15.4639	3.22249	1.81105	-5.32489	22.2096	12.5853	7.69603	37.7209	30.2349	-2.25023	226.938	289.263	584.159	1053.82	669.163
Notch-GFP.Notch-GFP-W3L_N_W3L	2.28879	18.4153	77.1455	5.09855	4.88573	20.734	38.5897	-1.07151	429.942	1.51024	362.504	2088.98	-1.45707	86.2069	-2.62995	31.1704	-1.05169	3.22782	40.6348	-2.14143	617.046	53.9822	48.5419	10.0709	17.0861	45.3212	19.2313	249.016	62.6481	1.17954	21.497	71.4862	40.0514	0.537662	19.3924	5.17974	1.49575	0.599091	14.0426	3.78893	8.83675	20.3521	24.6724	5.54751	34.4934	77.1178	404.245	259.194	418.264
R13-YFP.3400_eve_Embryos-1-6-hr	-0.343236	12.3627	-1.53931	1501.6	-0.870388	1651.71	-0.987397	89.2479	6928.13	1554.25	7331.15	10886.4	824.494	2035.28	238.127	3756.6	914.012	1278.77	3713.05	952.635	8531.5	93.1095	1.25945	-0.929545	-1.13571	-0.293744	65.2193	68.8212	21.4193	17.9326	278.41	50.2049	22.8864	35.6784	13.1629	16.5157	-0.703906	321.819	379.703	74.6935	1752.98	373.514	121.69	-0.882384	-0.311381	2.52897	86.9363	169.447	138.727
S2-DRSC.2638_CTCF_S2	-2.02661	-2.85959	19.8612	15.6534	-0.857772	7.78133	0.526036	-1.70144	226.571	-0.854678	125.068	1259.7	-0.721355	24.0133	-1.67533	12.6813	-1.52154	2.95332	24.8215	-1.31163	350.583	15.8094	6.41639	-0.668096	1.44932	1.39122	13.9478	171.394	12.5783	-1.87588	7.36436	41.1103	7.78929	-1.50146	0.399303	0.819215	-1.3263	-0.79095	1.8758	-0.613812	-0.202332	3.96356	6.57583	-1.22071	1.4066	1.12934	420.075	66.2831	337.289
S2-DRSC.2639_CTCF_S2	-1.6659	-2.54645	17.5936	14.4887	-0.369327	7.50901	0.364353	-1.88122	167.324	-0.659113	197.997	1119.55	0.0703861	28.47	-1.71869	18.824	-1.29168	2.05191	33.392	-0.786997	402.337	11.3749	5.3188	-0.39096	2.63401	0.802353	16.7017	133.358	14.1434	-1.85296	5.98683	34.8666	6.0966	-1.30594	-0.554889	-0.0923318	-1.33584	-0.588758	1.43877	-0.676229	2.6028	5.6856	6.24558	-0.860848	0.76153	0.0298874	424.293	46.583	234.832
S2.913_CTCF_S2_ChIPchip	-2.9381	-4.14954	4.44244	-3.47924	-2.4835	-0.985719	-2.36451	-2.71578	56.1202	-3.2188	30.4691	318.673	-3.17657	2.01652	-3.06998	0.535833	-3.10607	-3.28113	2.50304	-2.99593	95.8557	0.58987	-2.46011	-2.74835	-2.40532	-2.47358	-0.943498	17.8592	0.939493	-2.9051	-2.04736	2.44918	-1.4692	-3.05451	-2.46898	-3.6024	-3.38868	-2.95714	-2.05181	-3.40283	-3.53618	-2.08044	-2.06339	-2.97047	-2.6365	-3.22138	87.9824	13.2333	74.5326
S2.CG8478-S2_CG8478_S2	5.13477	1.80943	226.287	15.9127	15.1146	65.5687	56.886	-1.18404	757.913	10.3676	811.261	3597.1	0.12942	163.101	-0.206985	70.9731	-1.03374	17.9256	59.096	0.280623	1316.88	203.234	7.29918	33.3068	85.7261	8.34846	63.978	191.409	103.64	7.08138	123.277	187.104	183.374	10.2663	71.1641	29.8543	19.3013	25.0797	49.5819	39.6637	19.1392	83.5955	97.9765	3.14082	5.71931	51.6802	91.8686	227.994	636.065
SENS-GFP.978_sens_Embryos-4-8-hr_ChIPchip	-4.95362	-6.97286	-7.11179	-6.86705	-6.01984	-4.24722	-4.5695	-4.63459	77.3222	-3.1095	88.8521	253.705	-4.63164	7.64267	-5.43523	10.4112	-4.48857	-3.36343	9.15006	-4.60057	131.315	-2.88448	-4.53346	-5.23989	-7.12938	-3.89055	-4.96908	-3.99562	-6.85389	-4.52546	-3.36723	-6.7292	-7.52759	-5.43148	-6.83051	-5.59622	-5.86537	-4.01248	-2.75243	-4.27435	-2.59776	-3.21903	-5.56361	-5.16593	-4.04204	-5.05335	1.524	0.605128	58.9839
Stat92E-GFP.Stat92E-GFP-0-12_Stat92E_Embryos-0-12-hr	-2.67391	-1.38936	117.003	409.103	42.2266	522.02	765.553	-1.19491	3839.73	914.022	5108.47	11869.6	45.2624	1062.1	164.511	523.123	1329.36	425.277	1699.14	109.622	6198.56	-2.84785	1620.48	33.9575	45.6068	5502.42	140.287	1161.35	366.65	-1.46409	41.722	215.166	186.926	-1.30329	47.4948	96.997	-3.70355	75.2442	172.144	103.913	531.034	173.145	182.265	-0.653042	1748.66	1281.79	318.101	3642.91	597.454
Stat92E-GFP.Stat92E-GFP-12-24_Stat92E_Embryos-12-24-hr	1674.45	1585.9	1227.23	114.376	180.016	172.576	2363.34	-0.466853	2107.6	-0.211744	1380.76	11843.7	-0.223977	374.5	-1.31665	295.999	-0.593888	-0.658375	99.7584	-1.12074	3742.73	161.154	4584.58	474.721	-0.919269	1775.46	290.89	930.183	965.795	-0.243834	22.1979	161.82	157.56	-0.627783	11.5276	5.89767	-0.644337	-0.764341	-0.801508	4.20536	40.9856	-1.30028	-0.7002	2168.12	486.899	1691.51	392.752	1419.38	1292.91
USP-GFP.USP-GFP-0-12_usp_Embryos-0-12-hr	1.13943	0.676019	154.125	14.4824	4.59453	51.3403	0.678309	-1.53291	306.338	7.85867	406.515	1665.59	-0.665164	88.9023	-0.69331	51.2074	0.353581	14.5185	85.3654	6.00331	568.062	102.066	0.471005	154.1	272.259	1.87402	46.1348	51.5258	151.851	3.50219	59.5392	128.006	173.155	47.7376	111.71	53.2654	40.2102	17.9403	19.9789	38.8478	20.0977	29.0967	36.5823	1.42123	3.48105	2.66562	72.3643	224.405	215.587
USP-GFP.USP-GFP-WPP12_usp_WPP12	53.8581	89.5896	977.971	47.8434	63.6979	106.858	39.6151	-0.64153	1096.23	4.80183	1247.65	6885.36	-0.840082	358.529	-2.13384	116.148	1.84006	112.24	99.8517	-1.12975	1563.37	168.824	-0.528162	815.845	813.892	7.01987	43.5311	265.199	231.299	9.44611	45.3488	252.541	190.451	28.0114	101.085	61.722	34.8251	125.181	115.293	47.8794	7.05893	81.93	92.5074	5.38524	6.74389	114.248	101.236	1721.32	731.122
Y-cn-bw-sp.2627_HDAC4a_Embryos-0-12-hr	0.00375494	-0.686694	210.625	8.45536	0.0144912	34.806	-0.409093	-1.7887	448.245	6.41736	551.836	1419.72	-0.561259	53.4974	-1.42423	81.8599	0.202511	19.1474	78.0778	3.02053	731.129	17.5678	-1.01034	2.11472	15.4876	-1.44539	10.3843	73.804	40.4393	-1.45382	25.3528	54.2465	29.254	7.94629	21.285	12.1851	6.71084	10.0853	15.4343	13.8826	15.6062	26.9692	30.9028	-1.00565	-1.16778	-0.534605	82.7082	817.854	332.446
Y-cn-bw-sp.2629_HDAC11_Embryos-0-12-hr	3.86691	3.86004	258.813	9.24143	2.64668	29.4096	-0.14344	-1.72132	405.328	3.43827	359.902	1811.28	-0.599929	46.96	-1.47788	74.1351	-1.00141	20.4668	76.3335	1.69473	788.101	30.1114	1.17873	8.97281	28.2925	-0.0084716	15.1256	130.9	73.2904	0.0951229	28.3872	77.1687	40.9095	8.06936	22.707	18.0343	9.30908	7.58024	21.3243	11.2821	14.4162	32.5355	41.4374	9.52562	0.646535	2.46312	47.3106	1193.02	498.991
Y-cn-bw-sp.2630_HDAC11_Embryos-0-12-hr	3.51239	16.4063	2.22153	3.30984	-1.20711	9.17412	-1.18285	2.26772	492.51	10.1778	441.579	2107.14	1.73164	43.8792	0.149697	40.5887	0.323506	13.5474	132.079	2.31084	864.19	11.9159	-1.08319	0.631026	8.23107	-1.10223	2.28236	99.7484	5.44229	1.16717	20.0548	36.6213	17.3391	0.347016	4.5335	0.225831	-0.365761	-0.149055	3.87519	-2.54583	4.19622	9.80163	11.2405	1.93778	-1.17606	-1.4827	75.9089	265.607	586.966
Y-cn-bw-sp.2633_HDAC3_Embryos-0-12-hr	-5.99733	-8.26874	-12.3224	-8.81842	-6.84395	-10.5442	-5.40979	-5.23255	8.19905	-7.62824	-4.71243	64.0069	-6.35132	-10.3565	-5.88841	-10.6818	-6.61403	-8.33771	-3.93972	-6.5424	13.1519	-8.45801	-5.66122	-6.60042	-8.72712	-5.60854	-6.79205	-8.28773	-11.7687	-6.70185	-9.44149	-10.9754	-10.612	-7.54029	-9.43466	-8.24913	-6.7059	-7.14062	-8.43244	-7.59442	-9.22107	-9.26161	-8.86966	-6.12886	-4.81538	-6.11711	-12.6246	-12.672	15.4741
Y-cn-bw-sp.2634_HDAC3_Embryos-0-12-hr	-6.47239	-8.52076	-12.5277	-10.0969	-7.70226	-10.8696	-6.01294	-5.58851	1.91171	-8.93244	-8.74911	41.4986	-6.74012	-13.1188	-6.69583	-12.2016	-6.83343	-9.9475	-8.13699	-6.67338	4.94247	-9.26731	-6.11138	-7.03659	-8.98384	-6.18629	-8.02706	-10.7161	-11.904	-6.2915	-10.524	-12.1388	-12.4723	-7.74648	-10.0332	-8.42117	-7.67679	-8.33686	-9.2681	-8.13584	-9.98707	-11.182	-10.0645	-7.01678	-5.87305	-6.78881	-14.0583	-14.6187	9.10387
Y-cn-bw-sp.2636_HDAC1_Embryos-0-12-hr	-2.44881	-4.00373	68.9335	2.60839	-2.25896	26.5558	-2.50574	-3.69233	347.235	0.0634393	222.081	964.504	-2.6204	71.0672	-2.9305	30.4838	-2.37713	9.85474	24.975	-1.90945	430.294	25.5129	-2.11191	-0.818786	1.40499	-2.228	2.36582	112.884	28.4443	-0.635134	20.2947	35.6662	20.3159	2.12092	11.5146	7.20514	0.494186	2.05503	8.38977	5.08545	4.9221	16.157	10.1467	-2.19685	-2.20395	-1.10503	45.9741	158.007	432.726
strain.3232_Sin3A_Embryos-0-12-hr	-1.23975	-2.20117	18.247	1.10229	-0.918914	19.5406	-0.949187	-1.79525	962.857	1.22953	239.071	2203.22	-1.24547	75.627	-2.35291	18.8659	-2.40729	23.2073	58.3483	-2.29611	771.968	39.0794	0.0505615	-0.482856	1.00777	-0.784304	-0.696034	451.159	13.6597	-1.73998	10.4243	32.4706	8.69195	-2.04444	3.36774	3.92891	-1.62476	-2.20693	1.34919	-0.684362	1.43156	11.8752	12.7664	-1.58896	-0.758038	2.02842	96.4556	382.22	1404.06
strain.3234_tll_Embryos-0-4-hr	3.91618	5.00931	120.821	40.488	1.54543	53.8233	3.84822	0.71517	936.35	18.2961	871.087	3185.06	4.95937	157.411	17.2097	192.466	6.50224	42.1561	161.233	45.8007	1276.68	39.3801	26.3228	19.3362	34.2392	24.0697	18.773	223.583	45.3351	-2.15581	24.772	61.4629	29.0014	-0.0491097	8.71821	1.27714	1.59268	4.68791	8.30675	9.16399	34.7701	15.6794	19.1386	10.5824	17.6142	19.7815	67.2562	659.364	568.186
strain.3237_Pcl_Embryos-0-8-hr	3.77969	22.6446	-3.2176	10.4486	-2.2135	17.9407	-1.30753	-0.157249	202.385	9.43316	310.039	581.31	6.1182	36.2898	0.195795	69.4104	0.727678	13.0428	121.767	3.66126	387.117	10.3653	-1.85486	-1.65959	-1.07471	-1.98878	-1.60772	1.31311	-2.87425	-1.89492	1.38894	0.566725	-3.22932	-1.0343	-2.12306	-1.90229	-2.31893	-0.1556	2.14544	-0.795543	10.7971	6.16496	1.49844	0.546789	-1.57186	-2.05313	9.7318	4.58087	52.5651
strain.3238_Trl_Embryos-16-24-hr	-3.06445	-4.46272	21.4054	-3.57714	-2.81376	-0.0694693	-2.5097	-3.53919	116.565	-4.07949	108.237	647.176	-4.52273	17.1735	-4.42398	6.70004	-4.39668	-3.78157	7.36017	-4.67282	192.065	11.6235	-3.00545	-1.79376	1.93144	-2.8198	-1.00061	24.9185	18.8865	-3.63948	0.961528	9.95554	10.4297	-3.2186	2.63797	-2.51213	-2.76761	-3.84148	-2.93578	-3.09869	-3.41183	-1.01934	-1.00555	-3.15918	-2.90259	-2.19724	23.1111	40.3957	100.695
strain.3239_eve_Embryos-1-6-hr	79.9918	124.029	1224.25	228.095	-0.604171	388.598	5.20831	9.15074	3418.67	79.2939	4051.04	7977.43	82.5217	701.265	7.44416	1071.28	31.8328	302.777	696.437	48.3267	5127.91	99.5685	-1.32275	46.1357	134.133	-0.640374	143.922	240.781	81.7011	4.41069	165.368	206.078	56.2661	19.0652	35.1609	15.023	6.69277	112.925	140.824	72.6456	113.191	190.021	152.833	9.78378	10.7311	1.84689	70.629	3814.64	1128.32
strain.3240_CG8478_Embryos-8-16-hr	3.21833	7.71256	34.1597	6.90421	6.37169	13.2625	28.0073	1.71118	916.425	23.5744	993.54	4042.31	5.65222	108.249	-1.44275	148.458	-0.248609	19.5052	247.533	4.8417	1615.27	112.894	15.3821	20.5259	55.7469	13.1158	47.3876	255.061	98.3811	1.2334	54.6096	151.827	83.9848	6.56254	46.7517	16.3687	12.2098	5.12607	42.3619	14.1926	37.6232	40.5954	59.5957	4.12664	11.8415	28.8757	176.595	171.994	969.893
strain.3242_hkb_Embryos-8-16-hr	-0.496457	-0.659531	473.197	130.527	51.357	307.894	25.4902	-0.964747	2112.07	-1.00379	2743.26	7750.09	-0.651113	521.234	-0.530619	414.407	104.231	136.397	773.438	105.353	4020.77	232.683	-5.30342	69.2115	267.897	-1.64638	50.7968	313.121	799.765	72.642	370.497	414.414	336.893	67.9044	65.2707	44.5011	-0.670365	146.492	268.733	339.059	315.729	250.877	149.057	-0.548875	-0.177368	-1.72821	407.466	1787.11	2321.35
strain.3243_kni_Embryos-8-16-hr	4.705	1.496	154.546	9.76315	8.52592	14.1401	3.50497	-1.54556	239.179	-0.476505	126.334	1719.35	0.718188	25.9616	-1.26373	9.9873	0.686358	4.07712	25.6082	-0.972891	382.301	33.1118	7.00859	8.88362	19.9494	7.64506	3.39346	129.409	49.9428	-1.28177	2.89739	25.0806	7.0729	-0.812804	8.723	0.298476	0.351812	-1.0202	9.46584	0.59047	1.7765	14.8339	7.30657	-1.3864	3.46202	8.01014	386.492	269.823	497.094
strain.3390_Hr39_Embryos-16-24-hr	14.8396	136.612	-1.15111	0.389223	-1.06164	1.08464	-1.1101	-0.8022	91.3467	1.37461	91.105	676.076	0.387103	13.7631	-1.33431	22.1209	-1.44647	5.95517	58.4431	-0.538526	305.891	2.04719	0.109174	0.297688	4.4149	-0.91483	1.5792	-0.453262	0.88818	-1.91925	0.878418	3.38934	0.273556	-1.3761	0.87763	-1.84949	-1.87657	0.0683747	1.80234	-0.985272	2.47641	2.60146	3.45606	31.7442	-0.027315	-0.863884	9.85058	15.0869	21.6908
strain.3391_HP1b_Embryos-16-24-hr	-23.9493	-24.6572	-26.4133	-25.791	-26.4432	-29.3925	-19.764	-24.7533	-26.7213	-23.9872	-30.4657	-18.195	-26.1024	-24.2296	-22.9656	-28.0899	-25.2129	-26.9064	-28.6195	-23.5281	-25.5787	-27.4146	-17.8528	-24.8847	-26.4727	-20.3106	-22.2578	-26.2367	-27.3253	-22.9892	-27.2377	-28.598	-25.8038	-24.7053	-27.7006	-28.2864	-26.6678	-23.4693	-28.3379	-27.2346	-27.1667	-26.2821	-27.056	-23.0222	-19.4312	-20.9989	-29.4268	-26.1095	-26.2587
strain.3392_HP1b_Embryos-16-24-hr	-21.7794	-23.0232	-25.1106	-29.697	-28.7981	-30.4854	-24.6568	-29.5942	-28.7424	-28.0174	-30.8166	-9.09446	-22.8452	-27.4007	-22.9781	-29.9655	-24.1497	-27.0167	-29.3274	-24.2286	-27.1154	-31.8974	-17.6601	-28.564	-27.9635	-20.4297	-24.1742	-23.703	-28.2363	-24.237	-27.0577	-27.4713	-28.391	-27.7243	-29.0004	-25.646	-27.9869	-28.1341	-28.3811	-24.1595	-28.1793	-29.9446	-31.3975	-22.5872	-20.1491	-20.6854	-28.2654	-22.8438	-30.4502
strain.3393_bon_Embryos-16-24-hr	3.14102	6.69871	90.9144	1.04151	10.534	9.27627	15.2608	-0.383154	341.456	0.356289	173.82	2822.6	-0.53803	102.406	-1.53652	68.0272	1.45464	8.7055	26.0495	0.884927	672.452	101.52	0.0411991	18.9772	58.4376	2.20939	30.1095	87.0864	119.714	1.80952	50.698	90.9474	75.607	3.48019	32.52	8.67408	8.12716	7.43198	23.0617	4.03335	19.6948	29.548	30.0692	3.10547	2.84658	9.90247	72.0198	127.698	278.006
strain.3394_Kr_Embryos-16-24-hr	-0.870242	-0.813055	65.3044	2.9617	8.1083	16.4059	12.2159	-1.03921	336.636	2.12603	195.989	2617.82	5.20769	25.9707	-0.834074	26.4436	-0.73581	3.71338	2.91331	-1.4894	477.042	13.802	67.7721	-0.0405843	9.09025	44.797	11.1465	540.652	43.2642	-0.82624	2.5067	173.857	30.3882	-1.52476	35.3735	-1.10132	5.11651	-0.972945	2.14891	-1.06903	5.32277	2.50371	8.15029	0.762413	43.6593	27.1183	1342.46	356.617	333.139
strain.3395_D_Embryos-0-8-hr	-0.819075	4.97955	18.6875	457.678	8.85718	582.595	1.86836	23.6578	4162.47	345.032	5440.25	5969.24	202.204	1588.64	105.653	2070.12	324.167	680.27	929.529	129.448	4268.65	31.4141	2.36304	5.16408	8.13272	-1.13879	39.2995	26.4089	14.1632	12.8617	180.847	60.6318	21.2952	18.1516	11.6447	26.8496	0.118969	229.314	260.012	69.7667	581.148	248.872	72.4115	6.32569	-0.22985	0.403999	15.0708	142.635	138.682
strain.3396_Suvar3-9_Embryos-0-12-hr	-0.577185	0.160072	26.4336	14.5707	-0.163151	34.1971	-1.20903	1.50457	587.949	18.4746	430.215	1603.95	2.4885	72.9485	-0.0764255	69.5755	3.38711	18.7504	96.5203	4.17666	653.133	33.867	-1.82475	2.51941	14.9996	-1.40768	10.4366	150.44	54.7545	2.88788	48.7719	79.9543	51.0773	4.87235	10.3582	7.97359	1.93818	6.30077	16.2536	9.52064	17.5611	25.7594	25.7261	-0.932902	-1.50038	-0.287961	34.4754	172.013	496.318
strain.3399_trem_AdultFemale	-0.779234	-1.59645	24.2874	-1.38424	-0.362637	10.2933	-0.119008	-2.42033	375.331	1.41549	168.984	1156.45	-1.03635	25.2943	-1.56166	12.4388	-1.91074	8.49247	38.7596	-1.51466	376.701	12.328	10.7016	-0.225019	0.141896	4.78313	-0.884728	188.605	12.1444	-2.11615	3.35406	13.5524	4.45454	-2.15417	1.54242	2.51769	-1.08006	-0.638789	0.308493	0.475248	3.27228	7.02771	4.97927	-0.10908	6.50011	11.6464	63.1311	237.033	632.121
[truncated: 122 more columns]
