# Supplementary material for: Diverse patterns of genomic targeting by transcriptional regulators in Drosophila melanogaster
Source: HighWire-hosted journal article supplement (doi:10.1101/gr.168807.113), 2014-07-01
Supplement: Supplemental_TableS4.xlsx [file Supplemental_TableS4.xlsx]

## Sheet: HOTmotifs
Factors highly enriched in HOT regions
	HOT overlap z-score
dl_E2-4	461.971
twi_E2-4	248.71
Med_E2-4	232.377
HDAC1_E0-12	225.54
da_E2-4	140.776
Trl_Kc167	111.803
TBP_E0-8	106.758
HDAC3_E0-12	101.111
HDAC11_E0-12	99.7434
Trl_E16-24	90.2649
HDAC4a_E0-12	89.0429
HDAC6_E0-12	73.6401
Trl_E8-16	71.0551
CTCF_E0-12	70.8694
mod(mdg4)_E0-12	58.9455
Sin3A_E0-12	54.2638
Motifs enriched in HOT regions
	HOT		WARM		COLD
Motif	Enrichment (log2)	p-value	Enrichment (log2)	p-value	Enrichment (log2)	p-value
Trl_FlyReg	1.13813	2.32231e-125	0.437658	9.10049e-26	-0.690658	2.25515e-58
CG16778_SANGER_5	1.06977	1.73156e-96	0.285939	2.79577e-10	-0.67626	3.16579e-49
tai_Clk_SANGER_5	1.02165	4.21367e-58	0.401285	4.21175e-13	-0.566806	1.35188e-23
Dref_FlyReg	1.01516	4.57881e-77	0.0960832	0.0506775	-0.911505	8.40679e-74
vfl_SANGER_5	0.956122	1.20099e-44	0.544013	3.10102e-21	-0.754311	2.47893e-34
ovo_SOLEXA_5	0.931965	1.66653e-36	-0.0517174	0.451894	-1.06943	4.47487e-53
vfl_SOLEXA_5	0.918651	2.03387e-37	0.529754	1.79659e-18	-0.669468	1.66225e-25
ovo_SANGER_5	0.903966	2.34958e-34	0.0452724	0.504136	-1.01177	1.02903e-48
brk_FlyReg	0.875659	2.17196e-62	0.523096	5.14069e-33	-0.477028	8.25536e-27
ovo_FlyReg	0.862174	1.23261e-15	0.0348112	0.736961	-0.753093	1.30914e-14
