# Supplementary material for: Diverse patterns of genomic targeting by transcriptional regulators in Drosophila melanogaster
Source: HighWire-hosted journal article supplement (doi:10.1101/gr.168807.113), 2014-07-01
Supplement: Supplemental_TableS5.xlsx [file Supplemental_TableS5.xlsx]

## Sheet: S2 enhancers
Chromosome	Start	Stop	Nearest TSS	Targeting TFs
CHR2L	10003568	10004068	CG4747	CTCF,Kr,HDAC1,HDAC11,Tbp,HDAC4a,twi,Trl,trem,dl,Su(var)3-9,cad,Sin3A,br,h,HDAC6,dm,HDAC3,hb,cnc,Med,da,
CHR2L	10057139	10057639	Pen	tll,HDAC1,GATAe,CTCF,Tbp,HDAC4a,twi,Trl,dl,mod(mdg4),Sin3A,disco,HDAC6,HDAC11,dm,HDAC3,hb,Med,da,
CHR2L	10060442	10060942	Spn31A	su(Hw),HDAC3,
CHR2L	1017246	1017746	CG4375	cad,chinmo,sna,
CHR2L	10200754	10201254	Ripalpha	CTCF,Tbp,twi,HDAC1,dl,HDAC3,Trl,jumu,pan,Sin3A,HDAC4a,dm,Eip74EF,hb,Med,
CHR2L	10204555	10205055	CG34159	dl,CBP,ttk,HDAC3,Med,
CHR2L	1024506	1025006	CG4375	su(Hw),mod(mdg4),
CHR2L	10246547	10247047	chico	CTCF,HDAC1,Tbp,twi,psq,dl,kn,mod(mdg4),Sin3A,eve,dm,Med,
CHR2L	10334419	10334919	GATAd	GATAe,CTCF,Tbp,twi,cnc,sens,HDAC1,dl,CG8478,Trl,prd,mod(mdg4),sc,zfh1,slp1,Hr78,N,Dfd,disco,HDAC6,HDAC11,HDAC4a,lola,HDAC3,Eip74EF,Med,
CHR2L	10424024	10424524	CG5168	HDAC4a,HDAC1,dl,HDAC3,ttk,
CHR2L	10426703	10427203	KdelR	HDAC1,CTCF,Ubx,Tbp,twi,dl,HDAC3,slp1,Sin3A,HDAC6,hb,cnc,Med,
CHR2L	10483052	10483552	Grip75	HDAC1,GATAe,HDAC4a,twi,dl,ttk,Sin3A,HDAC6,hkb,HDAC3,Med,da,
CHR2L	10500272	10500772	Myo31DF	CG8478,
CHR2L	10516361	10516861	Fatp	HDAC1,Sin3A,mod(mdg4),CTCF,Ubx,HDAC11,HDAC4a,bab1,trem,dl,E(z),su(Hw),HDAC6,ttk,Med,
CHR2L	10529072	10529572	Lip4	Trl,
CHR2L	10551298	10551798	Trim9	cad,
CHR2L	10573571	10574071	w-cup	hth,CTCF,
CHR2L	10588480	10588980	CG34161	-
CHR2L	1059606	1060106	IA-2	-
CHR2L	1060555	1061055	IA-2	da,
CHR2L	10608525	10609025	CG7329	hth,tin,twi,bin,gro,dl,Su(var)3-9,Mef2,CBP,Med,da,
CHR2L	10617372	10617872	CG7329	mod(mdg4),eve,Mef2,
CHR2L	10745783	10746283	CG6729	-
CHR2L	10756021	10756521	CG17124	bin,Trl,dl,bap,Dll,
CHR2L	1077690	1078190	ast	CTCF,gro,Tbp,HDAC4a,twi,HDAC1,Trl,dl,CG8478,prd,zfh1,HDAC3,N,Sin3A,z,disco,h,HDAC6,HDAC11,lola,dm,sens,hb,sna,Med,da,
CHR2L	107813	108313	Sam-S	HDAC1,CTCF,gro,Ubx,Tbp,twi,yki,Su(H),cnc,Trl,dl,Su(var)3-9,Sin3A,HDAC11,ttk,HDAC4a,HDAC6,HP1b,Med,da,
CHR2L	10850303	10850803	porin	HDAC1,Tbp,twi,sens,dl,Mef2,E(z),Trl,Su(var)3-9,Sin3A,disco,EcR,D,HDAC4a,hkb,dm,CTCF,cnc,Med,usp,da,
CHR2L	10934927	10935427	CG14072	-
CHR2L	109361	109861	Sam-S	Tbp,twi,sens,HDAC1,Trl,dl,Su(var)3-9,D,Med,da,
CHR2L	1095119	1095619	CG4629	cnc,
CHR2L	1100125	1100625	CG4629	-
CHR2L	11039540	11040040	CG18666	sens,Trl,eve,cnc,
CHR2L	11045033	11045533	CG18666	gro,bon,Mef2,yki,Su(H),usp,su(Hw),Trl,dl,CG8478,Hr78,EcR,Dll,
CHR2L	11053161	11053661	Samuel	gro,Hr78,
CHR2L	11059175	11059675	Samuel	twi,dl,Med,
CHR2L	1117070	1117570	Pino	CTCF,gro,dl,mod(mdg4),sna,Med,
CHR2L	1118911	1119411	Pino	CTCF,gro,Tbp,Snr1,twi,pan,Mef2,yki,Su(H),HDAC1,bin,bab1,Trl,dl,fru,E(z),gsb-n,prd,mod(mdg4),HDAC11,CG16778,Dll,HDAC4a,tin,hb,cnc,sna,Med,da,
CHR2L	11219074	11219574	ab	gro,sens,HDAC1,dl,CG8478,tll,Trl,da,
CHR2L	11245602	11246102	ab	cad,chinmo,
CHR2L	11249858	11250358	ab	su(Hw),CG8478,
CHR2L	1126465	1126965	Pino	gro,HDAC3,cnc,
CHR2L	11291788	11292288	CR43409	-
CHR2L	1129424	1129924	CG4552	HDAC1,dl,HDAC3,HDAC6,HDAC11,chinmo,HDAC4a,
CHR2L	11369140	11369640	salr	-
CHR2L	11382493	11382993	CG43681	-
CHR2L	11403570	11404070	CG43681	bin,
CHR2L	11445929	11446429	salm	CTCF,hth,mod(mdg4),gro,Tbp,tin,bon,twi,yki,Su(H),HDAC1,bab1,Trl,dl,CG8478,prd,tll,Su(var)3-9,zfh1,Stat92E,pan,cad,bap,N,z,Dfd,Dll,Abd-B,HDAC4a,brm,hb,E(z),Med,da,
CHR2L	11447475	11447975	salm	hth,mod(mdg4),CTCF,gro,tin,twi,Mef2,HDAC1,Trl,dl,CG8478,prd,bap,Dll,HDAC4a,sna,Med,da,cad,
CHR2L	11459898	11460398	salm	Kr,
CHR2L	11516537	11517037	CG6509	CTCF,HDAC1,Tbp,HDAC4a,twi,bab1,Trl,trem,dl,Mef2,CG8478,mod(mdg4),sc,Hr78,jumu,N,Sin3A,HDAC6,Abd-B,lola,dm,Eip74EF,Stat92E,Med,da,
CHR2L	11527965	11528465	CG31705	Trl,
CHR2L	1153459	1153959	capt	Trl,ttk,chinmo,
CHR2L	1157621	1158121	capt	HDAC1,CTCF,Ubx,Tbp,HDAC4a,bon,twi,Mef2,Trl,dl,CG8478,mod(mdg4),zfh1,Hr78,N,Sin3A,HDAC6,HDAC11,Med,da,
CHR2L	11628666	11629166	spag4	-
CHR2L	1172482	1172982	CG5118	HDAC1,Tbp,HDAC4a,dl,HDAC3,Sin3A,HDAC6,HDAC11,dm,Med,
CHR2L	11736051	11736551	CR44145	su(Hw),cad,
CHR2L	11740236	11740736	Vha100-5	cad,en,
CHR2L	11797569	11798069	snoRNA:Me18S-A934	Dfd,HDAC3,
CHR2L	11806692	11807192	crol	HDAC1,CTCF,gro,Tbp,bon,twi,Mef2,yki,Su(H),Trl,psq,dl,CG8478,prd,Su(var)3-9,zfh1,Hr78,Lpt,N,z,Dll,Med,da,
CHR2L	11807562	11808062	crol	HDAC1,CTCF,gro,Tbp,bon,twi,Mef2,yki,Su(H),Trl,dl,E(z),CG8478,gsb-n,prd,Su(var)3-9,sc,zfh1,Hr78,jumu,Lpt,N,z,disco,h,HDAC11,Dll,D,Abd-B,HDAC4a,HDAC6,psq,lola,dm,Eip74EF,Med,
CHR2L	11813369	11813869	CycY	Tbp,HDAC1,dl,Sin3A,h,HDAC4a,HDAC6,Med,
CHR2L	11823740	11824240	Pde1c	sens,hkb,
CHR2L	11829178	11829678	esc	CTCF,HDAC4a,HDAC1,dl,Trl,Ubx,Sin3A,HDAC6,D,dm,
CHR2L	11859937	11860437	CG42751	-
CHR2L	1188587	1189087	CG5001	-
CHR2L	11931371	11931871	Or33a	bin,
CHR2L	11954060	11954560	CG16964	sbb,
CHR2L	11961130	11961630	CR43314	-
CHR2L	11967272	11967772	CR43314	dl,prd,Med,da,
CHR2L	1197409	1197909	CG5139	su(Hw),
CHR2L	12006759	12007259	Rh5	CTCF,HDAC1,gro,Tbp,twi,pan,Mef2,cnc,Mad,dl,bin,CG8478,prd,usp,Lpt,D,h,HDAC6,HDAC11,HDAC4a,hth,dm,hb,sna,Med,da,
CHR2L	12010690	12011190	Rh5	hth,tll,Kr,HDAC1,CTCF,gro,Ubx,bcd,HDAC11,Tbp,tin,twi,Mef2,cnc,usp,bab1,Trl,dl,E(z),CG8478,prd,Su(var)3-9,pan,Lpt,cad,bap,D,Dll,z,ftz,h,HDAC4a,hb,sna,Med,da,EcR,
CHR2L	12024549	12025049	dmGlut	GATAe,
CHR2L	12054658	12055158	JhI-21	HDAC4a,HDAC1,Trl,dl,ttk,
CHR2L	12055616	12056116	JhI-21	HDAC1,gro,HDAC11,Tbp,HDAC4a,twi,yki,Su(H),Trl,dl,Sin3A,z,disco,HDAC6,Med,
CHR2L	120662	121162	CG4822	CTCF,HDAC1,Trl,CBP,HDAC11,HDAC4a,usp,EcR,
CHR2L	12096215	12096715	CG6712	HDAC1,Tbp,HDAC4a,twi,dl,HDAC3,ttk,Sin3A,HDAC6,dm,Med,
CHR2L	12108790	12109290	Rab6	HDAC1,Ubx,Tbp,HDAC4a,Trl,dl,E(z),HDAC3,Su(var)3-9,jumu,D,Sin3A,EcR,HDAC6,Med,
CHR2L	12124578	12125078	rho-6	-
CHR2L	12207529	12208029	CG31759	Trl,kni,dm,
CHR2L	12212058	12212558	CG31759	-
CHR2L	12256305	12256805	aret	su(Hw),
CHR2L	12271049	12271549	aret	su(Hw),
CHR2L	12288732	12289232	aret	Trl,dl,
CHR2L	12290177	12290677	aret	twi,sbb,
CHR2L	12296680	12297180	aret	Trl,
CHR2L	12327966	12328466	CG31862	CBP,
CHR2L	12365727	12366227	bru-2	hth,HDAC1,gro,twi,yki,Su(H),cnc,Trl,dl,bin,CG8478,gsb-n,prd,Su(var)3-9,Dll,tin,sna,da,
CHR2L	1239236	1239736	CG5397	-
CHR2L	12404301	12404801	vir-1	su(Hw),Trl,CG8478,
CHR2L	1242272	1242772	CG5397	chinmo,
CHR2L	12423057	12423557	vir-1	GATAe,CTCF,gro,Trl,
CHR2L	12458459	12458959	bun	twi,dl,ttk,sna,Med,da,
CHR2L	12461442	12461942	bun	HDAC1,gro,Tbp,twi,yki,Su(H),Trl,dl,slp1,Lpt,cad,z,eve,Dll,hth,hb,Med,da,
CHR2L	12462384	12462884	bun	Su(H),Trl,eve,D,
CHR2L	12464717	12465217	bun	eve,
CHR2L	12475207	12475707	bun	CG8478,eve,
CHR2L	12484062	12484562	bun	HDAC1,mod(mdg4),GATAe,gro,lola,Mef2,yki,Su(H),sens,bin,Trl,dl,usp,cad,Dll,disco,eve,HDAC11,D,hth,
CHR2L	12491486	12491986	bun	Trl,
CHR2L	12493072	12493572	bun	Trl,eve,
CHR2L	12495148	12495648	bun	Trl,CG8478,hth,cnc,
CHR2L	12504003	12504503	bun	CTCF,Su(H),Trl,dl,hb,Med,
CHR2L	12504711	12505211	bun	gro,Mef2,yki,Su(H),Trl,dl,Dll,hb,Med,
CHR2L	12513968	12514468	snoRNA:CG43051-a	HDAC1,Mef2,Trl,
CHR2L	12514947	12515447	snoRNA:CG43051-a	Trl,CTCF,
CHR2L	12521467	12521967	snoRNA:CG43051-a	HDAC1,Trl,dl,CG8478,z,eve,HDAC4a,psq,hb,Med,
CHR2L	12529450	12529950	CR42746	HDAC1,gro,Tbp,HDAC4a,bon,twi,Mef2,yki,Su(H),Trl,dl,CG8478,cad,Su(var)3-9,Hr78,Lpt,HDAC11,EcR,Dll,hth,Eip74EF,Med,
CHR2L	12531183	12531683	CR42746	bin,Trl,CBP,eve,cnc,
CHR2L	12532075	12532575	CR42746	CBP,
CHR2L	12534265	12534765	CR42746	Trl,
CHR2L	12535528	12536028	CR42746	Trl,Mef2,
CHR2L	12546088	12546588	bun	HDAC1,mod(mdg4),gro,Tbp,twi,yki,Su(H),Trl,dl,E(z),CG8478,sc,Hr78,N,Sin3A,Dfd,Mef2,Dll,Abd-B,Eip74EF,hb,Med,da,
CHR2L	12586917	12587417	nub	HDAC1,gro,HDAC4a,Mef2,yki,Su(H),Trl,dl,CG8478,cad,mod(mdg4),Hr78,N,HDAC11,Dll,Stat92E,Abd-B,HDAC6,hth,lola,dm,Eip74EF,da,
CHR2L	12617973	12618473	nub	HDAC1,mod(mdg4),gro,Tbp,twi,Mef2,yki,Su(H),Trl,dl,CG8478,sc,Hr78,Stat92E,N,z,Dfd,h,Dll,Abd-B,HDAC4a,lola,dm,Eip74EF,hb,E(z),Med,da,
CHR2L	12644061	12644561	Ref2	-
CHR2L	12704268	12704768	CG5776	Tbp,HDAC4a,twi,HDAC1,Trl,dl,E(z),Su(var)3-9,Sin3A,HDAC6,HDAC11,dm,HDAC3,Med,da,
CHR2L	12705406	12705906	spict	HDAC4a,sens,HDAC1,HDAC3,HDAC11,HDAC6,
CHR2L	12719335	12719835	MRP	cnc,sens,HDAC1,Trl,HDAC3,
CHR2L	12730964	12731464	MRP	twi,dl,su(Hw),sna,Med,da,
CHR2L	12823823	12824323	kek1	gro,Trl,Dll,
CHR2L	128426	128926	CG3164	gro,Su(H),sens,HDAC1,Trl,dl,z,hth,
CHR2L	12887677	12888177	ACXC	-
CHR2L	12922229	12922729	ACXA	-
CHR2L	1292449	1292949	robo3	chinmo,
CHR2L	12973993	12974493	Vha68-2	mod(mdg4),CTCF,HDAC1,Trl,dl,CG8478,gsb-n,kni,hkb,psq,cnc,
CHR2L	12995931	12996431	CG12404	CBP,
CHR2L	13041056	13041556	CG9932	Trl,
CHR2L	13048954	13049454	CG9932	su(Hw),
CHR2L	13068261	13068761	CG9932	Trl,
CHR2L	13073902	13074402	CG9932	HDAC4a,Trl,eve,HDAC11,
CHR2L	13083054	13083554	CG9932	Trl,
CHR2L	13091226	13091726	CG5142	-
CHR2L	13099496	13099996	CG5142	-
CHR2L	13126974	13127474	CG5122	sna,
CHR2L	13140882	13141382	CG9928	-
CHR2L	13165368	13165868	Sir2	HDAC1,gro,Ubx,Tbp,twi,yki,Stat92E,Trl,psq,dl,cnc,Su(var)3-9,HDAC3,Sin3A,z,br,HDAC11,HDAC4a,HDAC6,Hr39,hb,Med,da,
CHR2L	13190481	13190981	CG16974	HDAC1,GATAe,twi,dl,disco,D,hkb,sna,Med,da,
CHR2L	13203693	13204193	Pect	Sin3A,GATAe,Ubx,HDAC11,Tbp,HDAC1,Trl,dl,Mef2,bin,Su(var)3-9,slp1,z,disco,HDAC6,D,HDAC4a,HDAC3,Med,
CHR2L	13205276	13205776	Pect	HDAC1,Trl,dl,Mef2,bin,bap,twi,
CHR2L	13206164	13206664	Pect	sens,Trl,usp,EcR,
CHR2L	13207569	13208069	CG15482	-
CHR2L	13267817	13268317	CG44085	pan,
CHR2L	13289829	13290329	CG31729	HDAC1,gro,Ubx,Trl,dl,HDAC6,dm,cnc,
CHR2L	13331037	13331537	CG43778	Su(H),Trl,Dll,
CHR2L	13435276	13435776	Tehao	su(Hw),cad,
CHR2L	13474963	13475463	CG42784	CTCF,su(Hw),chinmo,sna,
CHR2L	13507553	13508053	CG42784	CBP,
CHR2L	13509826	13510326	CG42784	chinmo,cnc,
CHR2L	13511158	13511658	CG42784	gro,Trl,dl,cad,cnc,
CHR2L	13514036	13514536	CG33640	gro,twi,yki,Su(H),cnc,usp,HDAC1,Trl,dl,CG8478,gsb-n,eve,HDAC11,Dll,HDAC4a,Med,da,
CHR2L	13545253	13545753	B4	GATAe,
CHR2L	13554493	13554993	kuz	HDAC1,bin,dl,eve,
CHR2L	13560376	13560876	kuz	-
CHR2L	13569914	13570414	kuz	twi,EcR,da,
CHR2L	13572461	13572961	kuz	gro,pan,
CHR2L	13576256	13576756	CG9254	eve,
CHR2L	13614805	13615305	CG9254	CG8478,
CHR2L	13655471	13655971	CG18507	GATAe,su(Hw),
CHR2L	13664506	13665006	CG18507	dl,Trl,
CHR2L	136816	137316	CG31975	su(Hw),Trl,Mef2,
CHR2L	13683277	13683777	CG18507	su(Hw),
CHR2L	1372072	1372572	CG14346	-
CHR2L	13754711	13755211	TM9SF4	-
CHR2L	13803966	13804466	CAH1	gro,Trl,cnc,
CHR2L	13829451	13829951	Arpc1	HDAC1,GATAe,Tbp,HDAC4a,sens,Trl,dl,HDAC3,Sin3A,CBP,HDAC6,Med,
CHR2L	13839689	13840189	CG33307	HDAC4a,twi,eve,HDAC11,
CHR2L	13875119	13875619	cenG1A	gro,
CHR2L	1388417	1388917	CG14346	-
CHR2L	13887073	13887573	cenG1A	Kr,GATAe,twi,dl,prd,hb,Med,da,
CHR2L	13899167	13899667	Smg5	Trl,HDAC3,
CHR2L	13905154	13905654	Ance	HDAC1,CTCF,bcd,twi,Trl,dl,HDAC4a,cad,hb,cnc,Med,da,
CHR2L	13966888	13967388	nimB2	chinmo,
CHR2L	13971228	13971728	nimB5	Pcl,
CHR2L	13994111	13994611	rk	-
CHR2L	14023925	14024425	CG4500	gro,bon,twi,yki,Su(H),sens,bin,Trl,dl,E(z),cnc,gsb-n,Hr78,Lpt,N,z,HDAC11,Dll,HDAC4a,lola,sna,Med,da,
CHR2L	14026710	14027210	CG4500	twi,dl,chinmo,sna,Med,da,
CHR2L	14181086	14181586	CG43333	Trl,sbb,
CHR2L	14219488	14219988	smi35A	-
CHR2L	14221330	14221830	smi35A	eve,
CHR2L	14234728	14235228	smi35A	Tbp,Trl,dl,bin,Lpt,Mef2,eve,dm,Med,
CHR2L	1424648	1425148	CG43401	Mef2,cad,eve,HDAC11,D,
CHR2L	1426572	1427072	CG43401	hth,Kr,gro,pan,HDAC1,dl,cad,cnc,usp,eve,HDAC11,Mef2,
CHR2L	1431812	1432312	snRNA:U3:22A	gro,
CHR2L	14339136	14339636	CG15286	chinmo,
CHR2L	14354841	14355341	l(2)34Fd	CTCF,HDAC1,Sin3A,mod(mdg4),lola,Tbp,HDAC4a,twi,sens,Trl,trem,dl,E(z),HDAC3,pan,HDAC6,HDAC11,dm,CG8478,Med,da,
CHR2L	14368500	14369000	spel1	pan,
CHR2L	14393287	14393787	ppk	dl,cad,
CHR2L	14399308	14399808	elB	hth,
CHR2L	14405747	14406247	elB	cad,hth,
CHR2L	14409404	14409904	elB	HDAC1,gro,HDAC11,bon,Mef2,yki,Su(H),Trl,trem,dl,Su(var)3-9,insv,CBP,kni,Dll,sbb,
CHR2L	14438764	14439264	CG15283	twi,da,
CHR2L	14442508	14443008	CG15283	hth,Kr,twi,gro,dl,prd,cad,Med,da,
CHR2L	14490096	14490596	noc	hth,tll,HDAC1,GATAe,gro,bcd,HDAC11,Tbp,tin,twi,Mef2,yki,Su(H),sens,Trl,dl,kn,E(z),CG8478,gsb-n,prd,Su(var)3-9,slp1,Lpt,cad,bap,z,insv,kni,disco,h,Dll,D,Abd-B,HDAC4a,Eip74EF,hb,sna,Med,da,
CHR2L	14513109	14513609	tRNA:G3:35Ba	hth,HDAC1,HDAC4a,sens,Trl,gro,dl,bin,cnc,tll,eve,bap,Mef2,disco,HDAC11,twi,tin,en,Med,da,
CHR2L	14534160	14534660	tRNA:G3:35Be	tin,CBP,hth,
CHR2L	14580754	14581254	CG42680	hth,Kr,CTCF,gro,twi,dl,CG8478,pan,Dll,Trl,
CHR2L	14621262	14621762	Adh	GATAe,Trl,jumu,
CHR2L	14632758	14633258	Adh	EcR,
CHR2L	14682167	14682667	osp	CBP,
CHR2L	14844236	14844736	CG42682	-
CHR2L	14999534	15000034	mol	cnc,
CHR2L	15039446	15039946	Su(H)	HDAC1,Sin3A,GATAe,CTCF,Ubx,bcd,Tbp,HDAC4a,twi,bab1,Trl,gro,trem,dl,slp1,Dfd,cad,z,HDAC6,HDAC11,D,dm,hb,cnc,Med,da,
CHR2L	15105405	15105905	CG15269	-
CHR2L	15184210	15184710	CG4168	-
CHR2L	15264527	15265027	yuri	HDAC1,gro,yki,Su(H),Trl,dl,E(z),HDAC3,Su(var)3-9,Dll,cnc,
CHR2L	15312311	15312811	nht	gro,cnc,
CHR2L	15339387	15339887	esg	bon,dl,CG8478,Trl,Dll,HDAC4a,hth,su(Hw),
CHR2L	15464869	15465369	sna	HDAC4a,gro,en,
CHR2L	1548769	1549269	haf	-
CHR2L	15500149	15500649	lace	CTCF,twi,HDAC1,Trl,dl,CG8478,mod(mdg4),HDAC6,HDAC11,Mef2,dm,Med,da,
CHR2L	15500777	15501277	lace	dl,ttk,
CHR2L	15530383	15530883	CR43761	-
CHR2L	1573310	1573810	CG10869	CTCF,gro,Trl,Dll,
CHR2L	15790702	15791202	CG18109	-
CHR2L	15793501	15794001	CG18109	-
CHR2L	158546	159046	CG33635	HDAC1,CTCF,Tbp,HDAC4a,Trl,dl,HDAC3,Su(var)3-9,Mef2,Sin3A,HDAC6,HDAC11,dm,Med,
CHR2L	15913584	15914084	CG13244	HDAC1,gro,Trl,Mef2,cad,Su(var)3-9,N,eve,EcR,Stat92E,Eip74EF,usp,
CHR2L	15914164	15914664	CG13244	HDAC1,Trl,Mef2,
CHR2L	15921203	15921703	CG4793	mod(mdg4),su(Hw),
CHR2L	15922655	15923155	CG4793	pan,
CHR2L	15934346	15934846	CG12448	su(Hw),
CHR2L	15984958	15985458	CR43412	-
CHR2L	1606575	1607075	CG31935	Pcl,chinmo,
CHR2L	160682	161182	spen	hth,Kr,HDAC1,gro,HDAC11,Tbp,tin,twi,Mef2,bin,Trl,dl,CG8478,HDAC3,zfh1,slp1,Lpt,cad,N,CBP,disco,HDAC4a,Hr78,hb,Med,da,EcR,
CHR2L	161640	162140	spen	hth,Kr,HDAC1,gro,HDAC11,Tbp,tin,twi,Mef2,bin,Trl,dl,kn,CG8478,HDAC3,prd,zfh1,slp1,Hr78,Lpt,cad,D,N,z,disco,Dll,Stat92E,Abd-B,HDAC4a,Eip74EF,hb,E(z),Med,da,
CHR2L	16191200	16191700	CR43806	CBP,
CHR2L	16254011	16254511	PRL-1	twi,Mef2,
CHR2L	16255110	16255610	PRL-1	HDAC1,Trl,kn,Mef2,zfh1,
CHR2L	16269258	16269758	CG4935	HDAC1,mod(mdg4),gro,Tbp,twi,Mef2,yki,Su(H),bin,Trl,dl,kn,E(z),CG8478,Su(var)3-9,D,Sin3A,z,Dll,HDAC4a,dm,tin,Med,da,EcR,
CHR2L	16271318	16271818	CG4935	HDAC1,gro,HDAC4a,twi,Mef2,Su(H),Trl,dl,CG8478,sc,zfh1,Lpt,N,HDAC11,tin,Eip74EF,da,
CHR2L	1627903	1628403	RFeSP	su(Hw),Trl,mod(mdg4),eve,
CHR2L	16283439	16283939	crp	twi,bin,Trl,dl,slp1,z,hb,Med,da,
CHR2L	16284386	16284886	crp	Kr,HDAC1,gro,Ubx,twi,yki,Su(H),bin,Trl,dl,Mef2,E(z),CG8478,slp1,N,z,Dll,dm,tin,hb,Med,da,EcR,cad,
CHR2L	16286474	16286974	crp	hth,HDAC1,CTCF,gro,Ubx,HDAC11,Tbp,HDAC4a,tin,twi,Mef2,yki,Su(H),Trl,psq,dl,kn,CG8478,prd,mod(mdg4),zfh1,slp1,Hr78,jumu,pan,Lpt,cad,N,Sin3A,z,disco,HDAC6,eve,Abd-B,HDAC3,hb,Med,da,
CHR2L	16319857	16320357	cact	GATAe,twi,sens,dl,Mef2,cad,cnc,Med,da,
CHR2L	1634349	1634849	chinmo	eve,pan,
CHR2L	16350431	16350931	chif	CTCF,HDAC1,Tbp,twi,usp,Trl,dl,kn,Lpt,Sin3A,z,eve,HDAC11,psq,dm,hb,Med,da,
CHR2L	16351442	16351942	chif	HDAC1,Tbp,twi,yki,sens,Trl,psq,dl,CG8478,Hr78,usp,pan,eve,N,z,CBP,HDAC6,HDAC11,Stat92E,HDAC3,tin,hb,Med,
CHR2L	16376013	16376513	jhamt	su(Hw),
CHR2L	1638335	1638835	chinmo	E(z),Trl,tll,Dfd,HDAC6,eve,HDAC11,HDAC4a,
CHR2L	16414629	16415129	snoRNA:Me28S-A2958	twi,sens,su(Hw),dl,HDAC4a,
CHR2L	16422564	16423064	snoRNA:Me28S-A2958	CTCF,HDAC1,gro,twi,yki,Su(H),Trl,dl,Mef2,E(z),CG8478,tll,Hr78,N,Dfd,Dll,Abd-B,HDAC4a,Med,
CHR2L	1643502	1644002	chinmo	bon,pan,dl,dm,E(z),CG8478,Trl,CBP,eve,HDAC11,Dll,Hr39,hth,Hr78,
CHR2L	16448187	16448687	CG5888	Su(H),Trl,eve,cnc,EcR,
CHR2L	16474641	16475141	dac	dl,cnc,
CHR2L	16491414	16491914	Tpr2	CTCF,HDAC1,Sin3A,GATAe,Ubx,lola,Tbp,twi,yki,bab1,trem,dl,CG8478,prd,tll,ttk,mod(mdg4),zfh1,jumu,pan,disco,HDAC6,HDAC11,CG16778,cad,HDAC4a,hkb,dm,Eip74EF,Med,
CHR2L	16511167	16511667	CG5953	Trl,Su(var)3-9,chinmo,cnc,
CHR2L	16519855	16520355	CG5953	HDAC1,gro,yki,Su(H),Trl,dl,gsb-n,CBP,eve,Dll,HDAC4a,cnc,
CHR2L	16521337	16521837	CG5953	gro,Tbp,bon,twi,Mef2,yki,Su(H),cnc,HDAC1,bin,Trl,dl,CG8478,gsb-n,slp1,Stat92E,Lpt,Dfd,bap,N,z,h,pan,HDAC11,Abd-B,HDAC4a,Hr39,da,EcR,
CHR2L	165241	165741	spen	HDAC1,twi,Trl,dl,slp1,disco,HDAC4a,hb,Med,da,
CHR2L	16525966	16526466	snoRNA:Me28S-C1237	gro,bon,Mef2,yki,Su(H),cnc,Trl,dl,CG8478,Su(var)3-9,N,insv,CBP,EcR,Dll,Stat92E,
CHR2L	16528398	16528898	snoRNA:Me28S-C1237	cnc,Trl,ttk,
CHR2L	16529986	16530486	snoRNA:Me28S-C1237	cnc,Trl,su(Hw),dl,
CHR2L	16533165	16533665	CG5953	hth,HDAC1,gro,HDAC11,Tbp,bon,twi,Mef2,yki,Su(H),cnc,usp,bin,Trl,psq,dl,kn,E(z),cad,gsb-n,z,h,eve,EcR,Dll,Stat92E,HDAC4a,Med,da,
CHR2L	16534176	16534676	CG5953	gro,lola,Mef2,yki,Su(H),cnc,usp,bin,Trl,psq,dl,CG8478,z,Eip74EF,
CHR2L	16562703	16563203	CG5968	-
CHR2L	1656627	1657127	chinmo	dl,Mef2,CG8478,Trl,eve,hth,CTCF,
CHR2L	16587839	16588339	CG42389	HDAC1,gro,Tbp,bon,twi,Mef2,yki,Su(H),Trl,dl,Su(var)3-9,mod(mdg4),Lpt,z,CBP,eve,HDAC11,EcR,HDAC4a,dm,HDAC3,hb,sna,Med,usp,cad,
CHR2L	16601576	16602076	CG42389	HDAC1,mod(mdg4),gro,Tbp,tin,twi,yki,Su(H),bin,bab1,Trl,dl,gsb-n,Su(var)3-9,Hr78,usp,pan,Lpt,N,Mef2,z,eve,HDAC11,Dll,Abd-B,hb,Stat92E,Med,da,cad,
CHR2L	16612095	16612595	CG4631	CG8478,
CHR2L	16621101	16621601	CR44151	HDAC1,eve,
CHR2L	16637273	16637773	CR44151	Trl,
CHR2L	16639359	16639859	CR44151	Trl,
CHR2L	166542	167042	spen	HDAC1,Tbp,twi,Mef2,Su(H),bin,Trl,dl,slp1,CG8478,Lpt,D,hb,Med,da,
CHR2L	16657315	16657815	CG42389	HDAC1,GATAe,dl,HDAC3,Dfd,disco,HDAC11,ttk,D,chinmo,HDAC6,hkb,
CHR2L	1667044	1667544	chinmo	Trl,dl,CG8478,psq,
CHR2L	1669203	1669703	chinmo	twi,HDAC1,Trl,dl,CG8478,cnc,CBP,hb,da,
CHR2L	16721049	16721549	Cyt-c-p	HDAC1,HDAC4a,twi,usp,Trl,dl,slp1,cad,eve,HDAC11,Med,da,
CHR2L	16783784	16784284	Cyt-b5-r	-
CHR2L	16798124	16798624	Ugt36Bc	cnc,Trl,
CHR2L	16803863	16804363	CG13280	HDAC4a,
CHR2L	16817350	16817850	mdy	HDAC1,CTCF,sens,Trl,dl,HDAC6,eve,HDAC11,cnc,usp,
CHR2L	16881853	16882353	CG34313	Trl,cnc,HDAC3,
CHR2L	16888933	16889433	tweek	Ubx,HDAC1,dl,N,EcR,cnc,Med,
CHR2L	1692748	1693248	cpb	Trl,cnc,
CHR2L	17016446	17016946	CG6304	-
CHR2L	17078380	17078880	CR43819	su(Hw),
CHR2L	1708094	1708594	CG17660	HDAC3,ttk,
CHR2L	1710167	1710667	CG17660	Kr,Tbp,twi,HDAC1,dl,HDAC3,Sin3A,HDAC6,ttk,HDAC4a,sna,Med,da,
CHR2L	1719544	1720044	frtz	Mef2,
CHR2L	1720820	1721320	CG18317	cnc,
CHR2L	17216113	17216613	CG15139	-
CHR2L	17231459	17231959	CG15139	hth,twi,
CHR2L	17244330	17244830	CG15139	da,
CHR2L	17277657	17278157	CG15140	-
CHR2L	17293090	17293590	CG6380	dl,
CHR2L	17387735	17388235	CLIP-190	HDAC11,
CHR2L	17427441	17427941	Dif	Trl,hth,cnc,
CHR2L	17429849	17430349	Dif	gro,bon,Su(H),Trl,cad,eve,EcR,Dll,
CHR2L	17430800	17431300	Dif	gro,Trl,Dll,Stat92E,
CHR2L	1743529	1744029	CG17646	-
CHR2L	17448795	17449295	dl	Dfd,dl,lola,eve,Trl,
CHR2L	17450371	17450871	dl	CTCF,gro,cnc,Trl,dl,kni,
CHR2L	17500725	17501225	CG6412	CTCF,HDAC1,HDAC11,Tbp,HDAC4a,twi,bab1,dl,Su(var)3-9,mod(mdg4),Sin3A,HDAC6,dm,Med,da,
CHR2L	1751801	1752301	CG17712	HDAC4a,twi,sens,HDAC1,dl,slp1,Sin3A,HDAC6,HDAC11,dm,hb,HDAC3,da,
CHR2L	17558424	17558924	CG7094	Trl,z,su(Hw),
CHR2L	17588864	17589364	Oli	CTCF,twi,dl,Trl,zfh1,da,
CHR2L	17598499	17598999	Sytalpha	twi,
CHR2L	17613833	17614333	CG15147	-
CHR2L	17921180	17921680	CR43274	-
CHR2L	18027325	18027825	rdo	-
CHR2L	18027854	18028354	rdo	bap,
CHR2L	18051449	18051949	Arr1	tll,
CHR2L	18092681	18093181	CG15153	-
CHR2L	1810285	1810785	CG31933	CBP,
CHR2L	18140072	18140572	kel	twi,Dfd,dl,HDAC3,lola,ttk,Hr39,sna,
CHR2L	18141537	18142037	kel	gro,HDAC4a,twi,Trl,dl,Su(var)3-9,h,HDAC11,ttk,da,
CHR2L	18143234	18143734	kel	twi,Mef2,sens,dl,bin,CBP,cnc,
CHR2L	18144978	18145478	kel	hth,HDAC1,HDAC4a,twi,Stat92E,gro,dl,pan,Lpt,cad,eve,HDAC11,D,HDAC3,Med,shn,da,
CHR2L	18146916	18147416	Socs36E	twi,dl,Med,
CHR2L	18148041	18148541	Socs36E	twi,dl,zfh1,CBP,Med,
CHR2L	18151416	18151916	Socs36E	HDAC1,CTCF,gro,Tbp,tin,twi,yki,Stat92E,dl,Mef2,CG8478,Trl,Su(var)3-9,mod(mdg4),sc,Hr78,Su(H),Lpt,N,z,CBP,Dfd,h,HDAC11,ttk,Dll,Abd-B,hth,lola,Eip74EF,Med,da,
CHR2L	18247985	18248485	CG43406	su(Hw),
CHR2L	18261704	18262204	CG31788	-
CHR2L	18332311	18332811	Fas3	da,
CHR2L	18414628	18415128	RpS26	su(Hw),
CHR2L	18443042	18443542	RpS26	Sin3A,CTCF,lola,Tbp,twi,HDAC1,Trl,dl,HDAC3,tll,kni,HDAC6,HDAC11,HDAC4a,dm,prd,Med,
CHR2L	18444757	18445257	RpS26	sens,Trl,dl,HDAC3,
CHR2L	18465108	18465608	CR43344	Snr1,Trl,
CHR2L	18475557	18476057	CG10283	HDAC3,da,
CHR2L	18501040	18501540	kon	Mef2,hth,da,
CHR2L	18516012	18516512	CG10211	CTCF,
CHR2L	18558737	18559237	Pde11	twi,Trl,eve,
CHR2L	18561483	18561983	Pde11	gro,Trl,dl,cad,z,EcR,
CHR2L	18563096	18563596	Pde11	HDAC1,mod(mdg4),gro,Mef2,bin,Trl,psq,dl,z,HDAC4a,
CHR2L	18565512	18566012	Pde11	Trl,
CHR2L	18566097	18566597	Pde11	cad,
CHR2L	18573754	18574254	Pde11	-
CHR2L	18606808	18607308	CG10333	HDAC1,dl,HDAC3,Su(var)3-9,HDAC6,ttk,Med,
CHR2L	18626780	18627280	MESR3	Trl,gro,eve,
CHR2L	18630662	18631162	MESR3	gro,EcR,
CHR2L	18653064	18653564	Cyp310a1	twi,pan,dl,eve,HDAC11,cnc,Med,da,
CHR2L	18655917	18656417	Cyp310a1	CTCF,
CHR2L	18693941	18694441	CG10383	HDAC1,HDAC4a,twi,sens,dl,ttk,eve,HDAC11,pan,HDAC3,
CHR2L	18702754	18703254	CG10376	HDAC1,Ubx,HDAC11,Tbp,HDAC4a,sens,trem,dl,tll,Su(var)3-9,Hr78,N,Sin3A,Dfd,HDAC6,ttk,Abd-B,HP1b,lola,HDAC3,Eip74EF,Med,
CHR2L	18718885	18719385	Irk3	dl,
CHR2L	18726502	18727002	CG10348	-
CHR2L	18731586	18732086	CG10348	HDAC4a,
CHR2L	18736804	18737304	CG42752	Tbp,twi,Mef2,HDAC1,Trl,dl,prd,Su(var)3-9,HDAC4a,Med,da,
CHR2L	18766968	18767468	ham	-
CHR2L	18787358	18787858	ham	Kr,Trl,cnc,
CHR2L	18795844	18796344	ham	mod(mdg4),gro,bon,yki,Su(H),Trl,dl,CG8478,N,h,Dll,Abd-B,HDAC4a,
CHR2L	18799700	18800200	CG43814	twi,bin,Mef2,HDAC4a,
CHR2L	18808228	18808728	CR43817	twi,gro,dl,prd,slp1,cad,ftz,Med,da,
CHR2L	18812666	18813166	CG42305	sens,
CHR2L	18839171	18839671	CG10600	CTCF,HDAC1,mod(mdg4),Tbp,HDAC4a,twi,bab1,Trl,dl,E(z),CG8478,HDAC3,Su(var)3-9,sc,zfh1,slp1,Hr78,N,Sin3A,z,HDAC6,Abd-B,lola,dm,Med,da,
CHR2L	1885968	1886468	CG7337	HDAC1,twi,sens,Trl,dl,Lpt,z,CBP,disco,D,hb,sna,Med,da,
CHR2L	18866624	18867124	mRpL13	twi,dl,
CHR2L	18954376	18954876	CG10621	Mef2,
CHR2L	18965979	18966479	Nak	pan,
CHR2L	18981895	18982395	CG10641	Kr,twi,Mef2,bin,HDAC11,CTCF,da,
CHR2L	18984037	18984537	CG10641	-
CHR2L	19034934	19035434	CG31800	HDAC1,Ubx,Tbp,twi,Mef2,Trl,dl,cad,Sin3A,HDAC6,HDAC3,Med,
CHR2L	1912984	1913484	CG7337	-
CHR2L	19134851	19135351	l(2)37Cg	HDAC1,gro,Tbp,tin,bon,twi,Mef2,yki,su(Hw),Trl,dl,E(z),bin,Hr78,Lpt,cad,z,HDAC11,Dll,D,hb,CG8478,Med,da,
CHR2L	19141004	19141504	l(2)37Cg	HDAC4a,twi,Trl,Dfd,dl,HDAC11,EcR,Hr39,da,
CHR2L	19154833	19155333	brat	hth,Tbp,twi,Trl,gro,dl,CG8478,prd,tll,pan,Lpt,cad,Mef2,CBP,disco,sc,en,hb,E(z),tin,sna,Med,da,EcR,
CHR2L	19157822	19158322	brat	HDAC1,gro,bcd,Tbp,tin,twi,Mef2,yki,Trl,dl,E(z),bin,CG8478,prd,pan,Lpt,bap,z,h,Dll,D,hb,Med,usp,da,EcR,
CHR2L	19161684	19162184	brat	Kr,gro,bcd,twi,HDAC1,Trl,dl,CG8478,prd,Su(var)3-9,pan,Lpt,cad,D,Mef2,z,HDAC11,HDAC4a,tin,hb,HDAC3,sna,Med,da,EcR,
CHR2L	19163267	19163767	brat	twi,Mef2,HDAC1,Trl,dl,prd,cad,z,HDAC11,EcR,hb,Med,da,
CHR2L	19219172	19219672	drl	hth,HDAC1,tin,twi,gro,dl,bin,prd,slp1,pan,kni,Mef2,disco,HDAC11,D,hb,sna,Med,shn,da,
CHR2L	19223649	19224149	drl	twi,da,
CHR2L	19361705	19362205	dnt	HDAC1,gro,twi,Su(H),bin,Trl,psq,dl,Stat92E,cnc,CBP,HDAC11,hb,
CHR2L	19364473	19364973	CG13086	CTCF,su(Hw),HDAC4a,
CHR2L	19380021	19380521	CG17350	GATAe,CTCF,disco,hkb,su(Hw),
CHR2L	19396804	19397304	CG17544	Trl,ttk,cnc,
CHR2L	19424094	19424594	CG16771	CTCF,gro,HDAC4a,yki,Su(H),HDAC1,Trl,dl,gsb-n,Dll,HDAC11,brm,
CHR2L	19424898	19425398	CG16771	CTCF,HDAC1,Trl,dl,HDAC11,
CHR2L	19426304	19426804	Pax	CTCF,HDAC1,mod(mdg4),Ubx,Trl,dl,E(z),tll,jumu,Lpt,cad,Sin3A,Dll,disco,h,HDAC6,HDAC11,D,Mef2,hkb,en,
CHR2L	19469023	19469523	CR43839	-
CHR2L	1947924	1948424	CG33673	-
CHR2L	19525708	19526208	CG10166	HDAC1,Ubx,HDAC4a,su(Hw),Trl,dl,HDAC3,mod(mdg4),Sin3A,HDAC6,Med,
CHR2L	19537147	19537647	CG13082	HDAC3,
CHR2L	19547036	19547536	CG10337	twi,cnc,Trl,psq,dl,eve,HDAC11,
CHR2L	19547764	19548264	Tep4	twi,Trl,psq,dl,zfh1,eve,cnc,Med,
CHR2L	19566119	19566619	CG13077	su(Hw),HDAC1,Trl,HDAC6,cnc,
CHR2L	19570504	19571004	spi	HDAC1,twi,Trl,dl,cad,CBP,hb,CTCF,
CHR2L	19571829	19572329	spi	HDAC1,mod(mdg4),gro,Tbp,twi,yki,Su(H),Stat92E,Trl,dl,kn,CG8478,sc,zfh1,Hr78,jumu,pan,Lpt,cad,N,Mef2,Sin3A,CBP,Dfd,disco,EcR,Dll,D,HDAC4a,psq,hkb,lola,HDAC3,Eip74EF,hb,Med,usp,da,
CHR2L	19575766	19576266	spi	hth,tll,CTCF,gro,HDAC11,Tbp,HDAC4a,tin,twi,Mef2,yki,Su(H),Stat92E,usp,HDAC1,bin,Trl,trem,dl,E(z),CG8478,prd,Su(var)3-9,mod(mdg4),zfh1,slp1,Hr78,jumu,pan,Lpt,bap,N,z,br,h,HDAC6,Abd-B,HDAC3,Eip74EF,hb,sna,Med,da,EcR,
CHR2L	19587067	19587567	Lar	CTCF,HDAC1,Tbp,HDAC4a,twi,sens,trem,dl,E(z),CG8478,ttk,Ubx,sc,Hr78,N,Sin3A,CBP,HDAC6,HDAC11,Abd-B,HDAC3,Eip74EF,
CHR2L	19686753	19687253	scw	-
CHR2L	19698636	19699136	scw	da,
CHR2L	19782089	19782589	CG10466	HDAC3,cad,
CHR2L	19785844	19786344	CdGAPr	-
CHR2L	19795609	19796109	fs(2)ltoPP43	CTCF,Ubx,Tbp,HDAC4a,HDAC1,dl,Su(var)3-9,cad,Sin3A,CBP,HDAC6,HDAC11,EcR,Dll,dm,Med,usp,
CHR2L	19806489	19806989	snRNA:U4:38AB	-
CHR2L	19823771	19824271	sick	su(Hw),
CHR2L	1986513	1987013	Got2	CTCF,gro,su(Hw),ttk,
CHR2L	19871163	19871663	sick	-
CHR2L	1989353	1989853	CR42874	cnc,
CHR2L	19910893	19911393	CR43097	-
CHR2L	19932588	19933088	sick	-
CHR2L	19943924	19944424	sick	hth,tin,bab1,disco,twi,hkb,dm,
CHR2L	20075610	20076110	neb	HDAC1,Sin3A,mod(mdg4),Tbp,HDAC4a,twi,trem,dl,tll,jumu,HDAC6,HDAC11,chinmo,dm,HDAC3,Med,da,
CHR2L	20118065	20118565	CG13970	dl,
CHR2L	20175680	20176180	CG10651	dl,
CHR2L	20205083	20205583	CG40341	Trl,twi,CTCF,tin,
CHR2L	20264691	20265191	CG17570	cad,
CHR2L	20334104	20334604	spir	-
CHR2L	2038191	2038691	Su(dx)	GATAe,gro,Tbp,twi,sens,HDAC1,dl,CG8478,Trl,N,z,ttk,Abd-B,HDAC3,CTCF,cnc,Med,da,
CHR2L	20417147	20417647	Arpc2	HDAC1,GATAe,Tbp,twi,yki,Su(H),Trl,dl,E(z),CG8478,sc,Hr78,N,Sin3A,z,disco,Mef2,Dll,Abd-B,dm,Med,
CHR2L	20478545	20479045	CG43234	pan,
CHR2L	20486271	20486771	CG34007	CTCF,Tbp,tin,twi,Mef2,dl,bin,Lpt,sna,Med,da,
CHR2L	20651850	20652350	CG2611	sens,HDAC3,
CHR2L	20674095	20674595	CG31678	twi,
CHR2L	20710305	20710805	Hr38	-
CHR2L	20733490	20733990	CG9318	HDAC11,Tbp,HDAC4a,twi,HDAC1,trem,dl,Sin3A,HDAC6,HDAC3,hb,cnc,Med,
CHR2L	20747028	20747528	CG9319	-
CHR2L	20780859	20781359	cad	dl,HDAC4a,
CHR2L	20792555	20793055	vari	Trl,HDAC3,
CHR2L	20795465	20795965	CR44146	GATAe,dl,
CHR2L	20805817	20806317	CG9328	pan,bin,kn,zfh1,eve,HDAC11,
CHR2L	20822646	20823146	CG9331	hth,HDAC1,CTCF,Tbp,HDAC4a,twi,Mef2,su(Hw),Trl,dl,Su(var)3-9,mod(mdg4),cad,HDAC6,HDAC11,dm,prd,da,
CHR2L	20824924	20825424	CG9331	CTCF,Trl,dl,
CHR2L	20878441	20878941	sky	GATAe,Trl,cnc,
CHR2L	20896340	20896840	CR33317	Trl,eve,
CHR2L	20905563	20906063	CR33317	-
CHR2L	20912798	20913298	sky	Trl,
CHR2L	20913702	20914202	sky	Trl,
CHR2L	20915156	20915656	sky	HDAC1,eve,
CHR2L	20935961	20936461	CG9270	HDAC4a,Trl,HDAC11,EcR,su(Hw),
CHR2L	20953727	20954227	CG42238	-
CHR2L	20961425	20961925	CG42238	-
CHR2L	20970757	20971257	CG42238	hth,hkb,
CHR2L	20981930	20982430	CG42238	HDAC4a,
CHR2L	20987396	20987896	CG42238	HDAC4a,
CHR2L	21038525	21039025	CG42238	HDAC1,bin,dl,bap,eve,CTCF,
CHR2L	21039783	21040283	CG42238	Kr,HDAC1,GATAe,twi,sens,gro,dl,cad,Mef2,disco,eve,D,hb,CTCF,Med,usp,da,
CHR2L	21041770	21042270	CG42238	-
CHR2L	21141388	21141888	Dap160	HDAC1,Tbp,Trl,dl,HDAC3,ttk,Med,HDAC11,
CHR2L	21173399	21173899	CG31627	HDAC3,
CHR2L	21209479	21209979	clumsy	-
CHR2L	21219692	21220192	CG8678	HDAC1,CTCF,HDAC4a,sens,Trl,trem,dl,E(z),HDAC11,cnc,da,
CHR2L	21237062	21237562	Hr39	CTCF,HDAC1,mod(mdg4),gro,Ubx,Tbp,tin,twi,Mef2,yki,bab1,Trl,trem,dl,fru,bin,CG8478,Su(var)3-9,Hr78,Lpt,N,Sin3A,z,h,HDAC11,EcR,Dll,D,HDAC4a,HDAC6,psq,Eip74EF,hb,E(z),sna,Med,usp,da,
CHR2L	21242810	21243310	Hr39	psq,
CHR2L	21250584	21251084	l(2)k14505	CTCF,HDAC1,mod(mdg4),gro,Mef2,yki,Su(H),Trl,psq,dl,CG8478,Su(var)3-9,Lpt,N,CBP,twi,HDAC4a,Eip74EF,usp,EcR,
CHR2L	21283892	21284392	Cyp6t2Psi	sens,HDAC3,
CHR2L	2129040	2129540	CG4259	CTCF,Trl,trem,dl,ttk,cnc,
CHR2L	21299424	21299924	Gr39a	CTCF,
CHR2L	2130115	2130615	GlyP	CTCF,mod(mdg4),gro,yki,Su(H),HDAC1,Trl,trem,dl,CG8478,kni,HDAC11,Dll,cnc,HDAC3,EcR,
CHR2L	21309193	21309693	Mio	HDAC1,mod(mdg4),CTCF,Tbp,twi,Mef2,bin,Trl,dl,prd,sc,Hr78,Lpt,Sin3A,disco,HDAC6,HDAC11,HDAC4a,dm,Med,da,
CHR2L	21311006	21311506	crc	HDAC1,CTCF,Ubx,HDAC11,Tbp,twi,trem,dl,N,Sin3A,HDAC6,dm,HDAC3,cnc,Med,da,
CHR2L	21313025	21313525	crc	HDAC1,gro,Trl,HDAC3,
CHR2L	21401251	21401751	His-Psi:CR31616	Su(H),Trl,
CHR2L	21416930	21417430	His1:CG33801	-
CHR2L	21426821	21427321	His1:CG33804	-
CHR2L	21542844	21543344	His-Psi:CR31614	-
CHR2L	21553485	21553985	His-Psi:CR31614	-
CHR2L	2161112	2161612	aop	gro,Tbp,bon,twi,Mef2,Su(H),HDAC1,bin,bab1,Trl,dl,gsb-n,prd,Su(var)3-9,CG8478,Lpt,disco,HDAC11,D,HDAC4a,Med,da,
CHR2L	2162776	2163276	aop	hth,GATAe,gro,HDAC4a,Snr1,tin,twi,Mef2,Su(H),sens,HDAC1,bin,Trl,dl,Su(var)3-9,CG8478,Lpt,bap,disco,HDAC11,brm,CTCF,sna,Med,da,
CHR2L	2164243	2164743	aop	hth,tll,Kr,HDAC1,gro,bcd,HDAC4a,tin,twi,Stat92E,sens,Trl,dl,cnc,prd,Su(var)3-9,Lpt,cad,kni,bap,Mef2,disco,ftz,HDAC11,D,Hr39,hkb,hb,E(z),sna,Med,shn,da,
CHR2L	21653035	21653535	CG43144	dl,
CHR2L	21655919	21656419	CG43144	-
CHR2L	21672655	21673155	CG2225	-
CHR2L	2168218	2168718	aop	da,EcR,
CHR2L	21753336	21753836	step	gro,twi,Trl,dl,mod(mdg4),eve,hb,sna,Med,cad,
CHR2L	2177885	2178385	aop	HDAC1,gro,Tbp,tin,twi,sens,bin,Trl,dl,Mef2,E(z),CG8478,slp1,HDAC3,N,h,HDAC11,HDAC4a,psq,hb,sna,Med,da,
CHR2L	2179337	2179837	aop	twi,sens,bin,HDAC1,Trl,dl,pan,HDAC4a,eve,Med,
CHR2L	21819541	21820041	tsh	hth,twi,sens,bin,bap,tin,
CHR2L	21828280	21828780	tsh	hth,mod(mdg4),gro,Tbp,twi,Mef2,yki,Su(H),sens,HDAC1,Trl,dl,kn,CG8478,cad,prd,Su(var)3-9,D,N,z,disco,h,Dll,Abd-B,HDAC4a,hkb,hb,Med,da,
CHR2L	21846626	21847126	tsh	hth,HDAC1,GATAe,HDAC4a,twi,sens,dl,Trl,jumu,z,disco,HDAC11,D,sna,Med,da,EcR,
CHR2L	21899147	21899647	CG11629	hth,mod(mdg4),GATAe,gro,Tbp,twi,yki,Su(H),HDAC1,Trl,dl,E(z),bin,CG8478,prd,N,z,Dfd,Mef2,Dll,Abd-B,HDAC4a,lola,dm,Eip74EF,da,
CHR2L	2191611	2192111	CG10874	HDAC1,dl,HDAC3,Su(var)3-9,pan,Sin3A,HDAC4a,Med,
CHR2L	21930740	21931240	CG11634	-
CHR2L	21931853	21932353	CG11634	chinmo,
CHR2L	21972803	21973303	CG2528	twi,prd,ftz,da,
CHR2L	2197319	2197819	CG34172	hth,Kr,gro,HDAC11,Tbp,HDAC4a,tin,twi,Mef2,Stat92E,usp,HDAC1,Trl,dl,fru,CG8478,cnc,Su(H),prd,Hr78,Lpt,cad,N,z,insv,HDAC6,eve,bin,EcR,Dll,Abd-B,dm,HDAC3,hb,E(z),sna,Med,da,
CHR2L	22018994	22019494	tio	hth,gro,Tbp,bon,twi,Mef2,yki,Su(H),sens,HDAC1,Trl,dl,kn,CG8478,gsb-n,Su(var)3-9,z,kni,Dll,HDAC4a,sna,Med,shn,da,cad,
CHR2L	22019514	22020014	tio	hth,twi,Mef2,Su(H),sens,HDAC1,Trl,dl,kn,gsb-n,Su(var)3-9,z,HDAC4a,CG8478,sna,Med,shn,da,
CHR2L	22024162	22024662	tio	CTCF,hth,gro,Tbp,twi,Mef2,yki,Su(H),Trl,dl,CG8478,tll,mod(mdg4),Stat92E,bap,D,z,Dfd,Dll,HDAC4a,dm,tin,Med,da,cad,
CHR2L	220676	221176	kis	Kr,HDAC1,Ubx,Tbp,Snr1,twi,Trl,dl,fru,pan,Lpt,cad,z,psq,hb,Med,da,
CHR2L	22181866	22182366	CG3635	Trl,HP1b,
CHR2L	22191130	22191630	Ir40a	HP1b,
CHR2L	221928	222428	kis	tll,Kr,HDAC1,gro,bcd,Tbp,twi,Mef2,yki,Su(H),Trl,dl,kn,fru,E(z),prd,zfh1,Lpt,cad,bap,z,disco,Dll,D,psq,hkb,hb,Med,da,EcR,
CHR2L	22219239	22219739	Ir40a	-
CHR2L	22260914	22261414	Tif-IA	dl,HP1b,
CHR2L	2228043	2228543	CR44114	Trl,dl,
CHR2L	2229750	2230250	CR44114	HDAC3,ttk,
CHR2L	22300494	22300994	CG17018	-
CHR2L	22333439	22333939	CR43359	-
CHR2L	22354009	22354509	CG17018	CTCF,HP1b,
CHR2L	22376825	22377325	CG17018	-
CHR2L	22408201	22408701	snoRNA:Psi28S-2996	CBP,
CHR2L	22409616	22410116	snoRNA:Psi28S-2996	CBP,
CHR2L	22411170	22411670	snoRNA:Psi28S-2996	-
CHR2L	22415017	22415517	snoRNA:Psi28S-2996	CBP,
CHR2L	224163	224663	kis	hth,HDAC4a,twi,Su(H),HDAC1,Trl,dl,Lpt,cad,z,CBP,disco,h,HDAC11,Dll,D,HDAC6,dm,hb,sna,Med,da,
CHR2L	2244860	2245360	CR42859	-
CHR2L	22532346	22532846	CG17494	HP1b,
CHR2L	22556647	22557147	CG17494	HP1b,
CHR2L	22572469	22572969	CR43927	-
CHR2L	22677798	22678298	CG40439	CTCF,Trl,mod(mdg4),
CHR2L	22682176	22682676	CG40439	HP1b,
CHR2L	22762386	22762886	CG17715	-
CHR2L	22773275	22773775	CG17715	-
CHR2L	22813948	22814448	lt	HP1b,
CHR2L	22855019	22855519	CG40005	HP1b,
CHR2L	22874774	22875274	cta	GATAe,Ubx,Snr1,HDAC1,N,disco,HDAC6,HDAC11,D,lola,
CHR2L	22886086	22886586	cta	Trl,HDAC3,HP1b,
CHR2L	22931110	22931610	Cht3	HP1b,
CHR2L	22938766	22939266	Cht3	-
CHR2L	22941455	22941955	Spf45	HP1b,
CHR2L	22995344	22995844	CR43242	-
CHR2L	2311854	2312354	eys	mod(mdg4),HDAC4a,
CHR2L	2362342	2362842	Rab5	HDAC1,gro,twi,Su(H),Trl,dl,cnc,
CHR2L	2362964	2363464	Rab5	HDAC1,gro,twi,Su(H),Trl,dl,cnc,
CHR2L	2364283	2364783	Rab5	HDAC1,CTCF,Ubx,Tbp,bab1,Trl,dl,E(z),CG8478,tll,mod(mdg4),cad,Sin3A,HDAC6,HDAC11,Stat92E,HDAC4a,Med,da,
CHR2L	2373370	2373870	CG3609	HDAC4a,Trl,HDAC11,ttk,HDAC3,cnc,
CHR2L	2424193	2424693	CG44139	chinmo,
CHR2L	2427361	2427861	dpp	Trl,
CHR2L	2428203	2428703	dpp	Trl,
CHR2L	2433081	2433581	dpp	HDAC4a,usp,eve,HDAC11,
CHR2L	244364	244864	kis	twi,HDAC1,Trl,dl,da,
CHR2L	2448436	2448936	dpp	tin,twi,dl,prd,N,z,ftz,Mef2,Dll,HDAC4a,Trl,Med,da,
CHR2L	2458009	2458509	tRNA:Y1:22Fb	tll,bcd,twi,dl,prd,slp1,ftz,chinmo,hb,sna,Med,da,
CHR2L	2461944	2462444	tRNA:Y1:22Fa	hth,Mef2,gro,dl,prd,Su(var)3-9,slp1,cad,CBP,HDAC11,hb,Med,da,
CHR2L	247398	247898	kis	HDAC1,gro,Snr1,bon,twi,sens,Trl,psq,trem,dl,fru,prd,Hr78,CG8478,N,z,hth,hb,Med,da,
CHR2L	247947	248447	kis	HDAC1,gro,Snr1,bon,twi,usp,Trl,psq,trem,dl,fru,prd,CG8478,z,hb,Med,da,
CHR2L	2482450	2482950	Slh	gro,su(Hw),
CHR2L	2488318	2488818	Slh	gro,Dll,
CHR2L	248943	249443	kis	HDAC1,gro,Tbp,twi,yki,Su(H),Trl,psq,trem,dl,fru,E(z),prd,Su(var)3-9,CG8478,pan,bap,Mef2,D,HDAC3,tin,hb,Med,da,cad,
CHR2L	2493921	2494421	oaf	Tbp,twi,HDAC1,trem,dl,Trl,mod(mdg4),slp1,bin,HDAC11,Med,da,
CHR2L	2521675	2522175	CG3528	-
CHR2L	2542485	2542985	CR44112	-
CHR2L	2584411	2584911	Drp1	CTCF,HDAC4a,HDAC1,trem,dl,Sin3A,ttk,HDAC3,Med,
CHR2L	2657804	2658304	Prosbeta4R2	-
CHR2L	2731478	2731978	CG31689	CTCF,Mef2,Trl,cnc,
CHR2L	2734835	2735335	CG31689	Trl,cnc,
CHR2L	2752348	2752848	CG9894	gro,bcd,Tbp,HDAC4a,tin,twi,Mef2,yki,Su(H),sens,HDAC1,Trl,Mad,dl,kn,E(z),gsb-n,prd,Su(var)3-9,mod(mdg4),jumu,Lpt,Sin3A,z,h,HDAC6,HDAC11,psq,hb,Med,da,pan,
CHR2L	2754109	2754609	CG9894	tll,HDAC1,GATAe,gro,bcd,Tbp,tin,twi,Mef2,yki,Su(H),bin,Trl,dl,kn,prd,slp1,jumu,Dll,z,disco,D,HDAC4a,hkb,hb,cnc,Med,da,EcR,
CHR2L	2755019	2755519	CG9894	tll,HDAC1,mod(mdg4),gro,bcd,Tbp,tin,twi,Mef2,yki,Su(H),sens,bin,Trl,dl,E(z),prd,Lpt,z,insv,HDAC11,Dll,HDAC4a,hb,sna,Med,da,
CHR2L	2765380	2765880	CG3077	HDAC1,Tbp,HDAC4a,bab1,dl,Mef2,HDAC3,gsb-n,tll,Su(var)3-9,en,CBP,HDAC6,HDAC11,ttk,dm,Med,
CHR2L	2767585	2768085	Taf10b	CTCF,HDAC4a,twi,sens,HDAC1,trem,dl,E(z),bin,HDAC3,Su(var)3-9,jumu,disco,HDAC6,HDAC11,D,hkb,Med,
CHR2L	277017	277517	CG17078	CTCF,HDAC1,Sin3A,Tbp,twi,sens,bin,Trl,trem,dl,HDAC3,tll,Ubx,slp1,jumu,z,HDAC6,HDAC11,Mef2,D,dm,hb,sna,Med,da,
CHR2L	2802170	2802670	Syt1	CTCF,
CHR2L	2806241	2806741	daw	gro,CBP,Dll,chinmo,
CHR2L	2829572	2830072	Duox	HDAC1,mod(mdg4),GATAe,HDAC4a,dl,Trl,Lpt,N,z,disco,h,HDAC11,Dll,psq,hkb,brm,
CHR2L	2845509	2846009	CG18557	-
CHR2L	2857913	2858413	CG2991	HDAC1,dl,Trl,N,cnc,
CHR2L	2872684	2873184	CG31694	HDAC1,HDAC4a,twi,dl,Mef2,prd,Hr78,pan,HDAC11,Med,da,
CHR2L	2873965	2874465	CG31694	HDAC1,Ubx,Tbp,HDAC4a,twi,Trl,dl,prd,tll,mod(mdg4),jumu,Sin3A,HDAC6,HDAC11,dm,Med,da,
CHR2L	2885053	2885553	NTPase	HDAC1,CTCF,Ubx,HDAC11,HDAC4a,twi,cnc,bab1,Trl,gro,trem,dl,su(Hw),prd,en,zfh1,cad,Sin3A,HDAC6,Mef2,dm,brm,Med,da,
CHR2L	2885656	2886156	lilli	CTCF,HDAC1,Ubx,HDAC4a,twi,bab1,Trl,gro,trem,dl,su(Hw),CG8478,tll,en,mod(mdg4),zfh1,Hr78,pan,Lpt,cad,N,Sin3A,Dfd,HDAC6,HDAC11,Mef2,D,Abd-B,lola,dm,brm,Eip74EF,Med,da,
CHR2L	2886473	2886973	lilli	HDAC1,CTCF,gro,HDAC11,twi,yki,Su(H),Trl,dl,CG8478,tll,mod(mdg4),zfh1,Hr78,pan,Lpt,cad,N,Dfd,HDAC6,Mef2,Dll,Abd-B,HDAC4a,lola,HDAC3,Eip74EF,Med,
CHR2L	2888494	2888994	lilli	HDAC1,GATAe,gro,twi,yki,Su(H),sens,Trl,dl,Mef2,prd,mod(mdg4),Lpt,disco,EcR,HDAC4a,psq,hb,Med,usp,da,
CHR2L	2900455	2900955	lilli	sens,Trl,dl,Mef2,
CHR2L	2908305	2908805	lilli	sens,bab1,dl,CG8478,Trl,EcR,Med,
CHR2L	2924379	2924879	lilli	Trl,
CHR2L	2935691	2936191	lilli	CTCF,Trl,
CHR2L	297968	298468	Pi3K21B	HDAC1,Sin3A,Tbp,Trl,trem,dl,E(z),CG8478,sc,zfh1,Hr78,Lpt,N,Dfd,h,Stat92E,HDAC4a,dm,brm,Med,
CHR2L	2989032	2989532	Bem46	sens,bin,dl,HDAC3,chinmo,sna,
CHR2L	2994140	2994640	CG3558	dl,HDAC3,ttk,sna,
CHR2L	3003188	3003688	CG17265	HDAC4a,
CHR2L	301177	301677	Pi3K21B	sens,hkb,
CHR2L	3012553	3013053	CG17224	HDAC4a,
CHR2L	3013651	3014151	CG17224	Dfd,
CHR2L	3018110	3018610	CG17224	HDAC4a,twi,HDAC1,dl,mod(mdg4),HDAC6,
CHR2L	3041899	3042399	CG17261	HDAC3,
CHR2L	3058883	3059383	CG3523	HDAC4a,bin,Trl,dl,hkb,chinmo,
CHR2L	3084186	3084686	toc	twi,bin,dl,prd,sna,Med,da,
CHR2L	3149161	3149661	Mad	HDAC4a,CBP,HDAC11,chinmo,
CHR2L	3297803	3298303	CG9664	da,
CHR2L	3299603	3300103	CG9663	GATAe,sens,zfh1,eve,hkb,
CHR2L	3301819	3302319	CG9663	hth,HDAC1,gro,Tbp,twi,Mef2,Su(H),usp,Trl,Dfd,dl,fru,bin,gsb-n,tll,Su(var)3-9,Hr78,Lpt,eve,Sin3A,HDAC11,EcR,HDAC4a,dm,brm,Med,da,
CHR2L	3338246	3338746	E23	Mef2,dl,CG8478,Trl,zfh1,N,z,HDAC11,EcR,pan,usp,
CHR2L	3346006	3346506	E23	gro,CG8478,cnc,EcR,Stat92E,HDAC4a,pan,psq,usp,
CHR2L	3352640	3353140	E23	Dfd,Dll,
CHR2L	3365891	3366391	CG34394	-
CHR2L	3366553	3367053	CG34394	-
CHR2L	3413773	3414273	CG31952	CBP,E(z),
CHR2L	3449818	3450318	Snx1	HDAC1,HDAC3,kni,HDAC6,ttk,chinmo,
CHR2L	3461483	3461983	CG3246	HDAC3,chinmo,
CHR2L	3465776	3466276	msl-2	HDAC1,Sin3A,Ubx,bcd,Tbp,HDAC4a,twi,dl,E(z),HDAC3,gsb-n,Su(var)3-9,HDAC6,HDAC11,ttk,hb,CTCF,sna,Med,da,
CHR2L	3469741	3470241	CG3238	CTCF,Tbp,HDAC4a,twi,HDAC1,dl,mod(mdg4),Hr78,Sin3A,HDAC6,HDAC3,cnc,
CHR2L	3475550	3476050	CR43928	CTCF,twi,usp,dl,gsb-n,HDAC4a,sna,Med,da,
CHR2L	3478112	3478612	Thor	HDAC1,GATAe,CTCF,gro,Tbp,twi,yki,Su(H),cnc,sens,bin,Trl,dl,gsb-n,Su(var)3-9,pan,cad,z,disco,HDAC6,HDAC11,Dll,D,HDAC4a,Med,da,
CHR2L	3479824	3480324	Thor	CTCF,bin,su(Hw),mod(mdg4),
CHR2L	35017	35517	Ir21a	CTCF,bab1,dl,mod(mdg4),Med,
CHR2L	3528938	3529438	Spindly	CTCF,HDAC4a,HDAC1,HDAC3,CBP,
CHR2L	3534056	3534556	Che-13	mod(mdg4),CTCF,gro,twi,yki,Su(H),Trl,dl,CG8478,z,HDAC11,Dll,sna,da,
CHR2L	3536160	3536660	drm	sbb,
CHR2L	3540736	3541236	drm	twi,sens,HDAC1,dl,prd,slp1,D,ftz,HDAC4a,Med,da,
CHR2L	3545231	3545731	drm	gro,yki,Su(H),Trl,dl,cad,z,kni,Dll,
CHR2L	3561107	3561607	CR43822	-
CHR2L	3570567	3571067	CR43822	gro,sens,dl,bin,z,
CHR2L	3573164	3573664	CR43822	HDAC4a,bon,cad,Trl,pan,eve,HDAC11,cnc,
CHR2L	3617224	3617724	Dot	CTCF,twi,da,
CHR2L	3628804	3629304	for	twi,bin,gro,bap,disco,eve,D,hkb,cnc,
CHR2L	3631955	3632455	for	CTCF,hth,mod(mdg4),gro,HDAC11,Tbp,HDAC4a,twi,Mef2,yki,Su(H),HDAC1,bin,bab1,Trl,dl,E(z),gsb-n,prd,tll,Su(var)3-9,zfh1,Lpt,eve,D,N,z,HDAC6,dm,brm,Hr78,sens,cnc,sna,Med,da,
CHR2L	3639714	3640214	for	CG8478,cad,chinmo,
CHR2L	3640788	3641288	for	-
CHR2L	3706782	3707282	CG31777	HDAC3,
CHR2L	3777589	3778089	bowl	HDAC1,gro,dl,cad,CBP,CTCF,cnc,sbb,
CHR2L	3778621	3779121	bowl	gro,twi,pan,dl,cad,Lpt,N,HDAC11,hth,CTCF,Med,da,
CHR2L	3807410	3807910	Reph	dl,HDAC3,chinmo,
CHR2L	3846152	3846652	slp2	twi,gro,dl,Med,da,
CHR2L	384669	385169	al	-
CHR2L	3872206	3872706	CG31957	CTCF,HDAC1,Ubx,HDAC11,HDAC4a,Mef2,dl,su(Hw),HDAC3,mod(mdg4),Sin3A,HDAC6,D,dm,Med,
CHR2L	3943090	3943590	CG31773	-
CHR2L	3958784	3959284	fred	-
CHR2L	3975156	3975656	fred	pan,
CHR2L	4008379	4008879	CG43774	-
CHR2L	4012765	4013265	CG43774	-
CHR2L	4031519	4032019	ed	HDAC1,Tbp,twi,Stat92E,Trl,dl,CG8478,Su(var)3-9,usp,pan,cad,N,HDAC6,Abd-B,HDAC4a,psq,HDAC3,hb,sna,Med,da,
CHR2L	4085952	4086452	snoRNA:Me28S-C437	gro,D,hkb,
CHR2L	4110638	4111138	Sr-CIII	sens,su(Hw),mod(mdg4),CBP,D,
CHR2L	4122316	4122816	Sr-CI	GATAe,sens,
CHR2L	414406	414906	alpha-Adaptin	CTCF,HDAC1,Sin3A,GATAe,Tbp,HDAC4a,twi,yki,sens,Trl,trem,dl,E(z),cnc,tll,Su(var)3-9,mod(mdg4),Ubx,jumu,Lpt,eve,z,CBP,kni,HDAC6,HDAC11,Mef2,hkb,D,dm,Med,shn,
CHR2L	4145166	4145666	CG2955	twi,da,
CHR2L	4197654	4198154	CG3714	Kr,HDAC1,CTCF,gro,yki,Su(H),Trl,dl,CG8478,Su(var)3-9,HDAC6,HDAC11,Dll,HDAC4a,pan,dm,cnc,
CHR2L	4222660	4223160	ft	HDAC1,Tbp,HDAC4a,dl,Trl,Su(var)3-9,Lpt,HDAC11,sna,Med,da,
CHR2L	4244142	4244642	CR44058	su(Hw),
CHR2L	4249438	4249938	CR44059	chinmo,
CHR2L	4316982	4317482	CG16857	su(Hw),
CHR2L	431727	432227	ex	HDAC1,mod(mdg4),GATAe,CTCF,Tbp,twi,sens,Trl,dl,bin,jumu,Mef2,CBP,D,Med,da,
CHR2L	4332697	4333197	Atet	HDAC1,gro,Tbp,HDAC4a,twi,sens,Trl,dl,E(z),CG8478,mod(mdg4),Hr78,jumu,Lpt,N,eve,HDAC11,D,pan,cnc,Med,da,EcR,
CHR2L	4339708	4340208	Atet	Trl,
CHR2L	435148	435648	CR43717	chinmo,
CHR2L	4366046	4366546	Traf4	HDAC1,twi,sens,dl,prd,cad,hb,E(z),sna,Med,da,
CHR2L	4368894	4369394	Traf4	hth,tll,tin,twi,sens,gro,dl,prd,slp1,cad,Mef2,ftz,D,hb,E(z),sna,Med,shn,da,
CHR2L	4372547	4373047	Traf4	HDAC11,twi,HDAC1,dl,E(z),HDAC3,cad,Mef2,HDAC6,ttk,D,HDAC4a,Trl,Med,da,
CHR2L	4377720	4378220	CG17612	twi,bin,dl,prd,sna,Med,da,
CHR2L	4389252	4389752	Tps1	-
CHR2L	440943	441443	CR43717	gro,dl,Su(var)3-9,pan,Lpt,HDAC11,Dll,hb,sna,Med,da,
CHR2L	4525139	4525639	ine	sens,chinmo,
CHR2L	452749	453249	crq	CTCF,HDAC1,Ubx,HDAC11,Tbp,HDAC4a,twi,Trl,dl,N,Sin3A,HDAC6,D,HDAC3,Med,
CHR2L	4568672	4569172	HP6	CBP,da,
CHR2L	4576576	4577076	HP6	hth,Kr,twi,HDAC1,dl,HDAC4a,HDAC6,
CHR2L	4627067	4627567	BG642163	sens,HDAC4a,en,
CHR2L	4639399	4639899	BG642163	-
CHR2L	4648597	4649097	CG43798	HDAC11,twi,
CHR2L	468931	469431	CG4297	CTCF,su(Hw),cad,hkb,
CHR2L	470306	470806	CG4297	pan,su(Hw),Trl,dl,E(z),gsb-n,N,eve,HDAC11,HDAC4a,
CHR2L	47311	47811	Cda5	CTCF,sbb,
CHR2L	478955	479455	cbt	HDAC1,mod(mdg4),gro,Tbp,HDAC4a,tin,twi,Mef2,su(Hw),Trl,dl,E(z),CG8478,Hr78,pan,Lpt,Sin3A,z,HDAC11,Stat92E,cnc,HDAC3,Med,da,
CHR2L	4800163	4800663	Clect27	-
CHR2L	480131	480631	cbt	gro,Tbp,HDAC4a,tin,twi,Mef2,yki,sens,usp,HDAC1,Trl,dl,E(z),gsb-n,Hr78,pan,Lpt,eve,N,disco,HDAC11,CG8478,Med,da,
CHR2L	4805366	4805866	Clect27	-
CHR2L	4808078	4808578	CG15629	sens,pan,Pcl,disco,
CHR2L	481034	481534	cbt	hth,gro,Tbp,tin,twi,pan,Mef2,yki,usp,HDAC1,Trl,Dfd,dl,E(z),CG8478,gsb-n,tll,Hr78,Lpt,eve,bap,h,HDAC11,CG16778,EcR,HDAC4a,Med,da,
CHR2L	484484	484984	cbt	gro,Mef2,HDAC1,Trl,cad,da,
CHR2L	4880510	4881010	Cf2	Trl,Dll,HDAC3,
CHR2L	4886513	4887013	CG15625	Ubx,HDAC4a,HDAC11,
CHR2L	4891651	4892151	CG3036	HDAC11,Tbp,twi,Mef2,HDAC1,Trl,dl,fru,bin,pan,z,disco,CG16778,HDAC4a,Med,da,
CHR2L	4913212	4913712	hoe1	sbb,
CHR2L	4922956	4923456	hoe1	gro,HDAC1,
CHR2L	492660	493160	ush	CTCF,dl,mod(mdg4),zfh1,pan,
CHR2L	4929002	4929502	hoe1	-
CHR2L	493895	494395	ush	-
CHR2L	4977362	4977862	CG3792	HDAC1,GATAe,Tbp,HDAC4a,tin,su(Hw),dl,E(z),prd,HDAC3,Sin3A,HDAC6,HDAC11,ttk,D,Med,
CHR2L	4997576	4998076	Rtnl1	CTCF,GATAe,gro,yki,Su(H),sens,usp,HDAC1,su(Hw),bab1,Trl,dl,E(z),CG8478,mod(mdg4),Hr78,jumu,Lpt,N,z,Dfd,disco,HDAC6,HDAC11,Dll,hkb,D,HDAC4a,dm,Eip74EF,EcR,
CHR2L	5007633	5008133	Rtnl1	CG8478,ttk,chinmo,
CHR2L	501963	502463	ush	Trl,Su(var)3-9,
CHR2L	5021635	5022135	vkg	Trl,
CHR2L	5052628	5053128	CG14040	HDAC1,gro,HDAC11,Tbp,HDAC4a,twi,sens,Trl,dl,E(z),prd,Su(var)3-9,HDAC3,Mef2,Sin3A,HDAC6,dm,hb,Med,da,
CHR2L	5059236	5059736	Rpn11	HDAC1,Tbp,HDAC4a,cnc,dl,HDAC3,Sin3A,CBP,h,HDAC6,HDAC11,ttk,dm,Med,
CHR2L	5075393	5075893	RpL37A	HDAC3,
CHR2L	5091965	5092465	pgant5	HDAC1,twi,dl,zfh1,HDAC3,Med,da,
CHR2L	5093307	5093807	pgant5	HDAC1,Tbp,twi,yki,bin,Trl,dl,CG8478,sc,zfh1,Hr78,Stat92E,D,N,Mef2,Sin3A,Dfd,hkb,Abd-B,HDAC4a,lola,tin,Eip74EF,Med,da,
CHR2L	5147555	5148055	Msp-300	Trl,eve,
CHR2L	5149457	5149957	Msp-300	Trl,eve,Mef2,hth,
CHR2L	518008	518508	ush	tll,bcd,twi,Trl,Mad,dl,prd,cad,kni,D,Mef2,ftz,eve,HDAC4a,hb,E(z),sna,Med,shn,da,
CHR2L	5197028	5197528	snmRNA:128	cad,da,
CHR2L	521347	521847	ush	HDAC1,HDAC4a,twi,Trl,dl,pan,Lpt,cad,HDAC11,Med,da,
CHR2L	523104	523604	ush	gro,bcd,Tbp,HDAC4a,twi,Mef2,yki,Su(H),HDAC1,Trl,dl,bin,Su(var)3-9,CG8478,pan,Lpt,N,z,h,HDAC6,HDAC11,Dll,Abd-B,tin,Med,da,
CHR2L	524590	525090	ush	gro,Trl,dl,Mef2,Med,
CHR2L	5246848	5247348	tkv	-
CHR2L	5292801	5293301	vri	gro,yki,usp,HDAC1,Trl,dl,CG8478,tll,Hr78,Lpt,N,HDAC11,EcR,Dll,Abd-B,cnc,
CHR2L	5294728	5295228	vri	gro,sens,usp,Trl,CG8478,cad,EcR,Stat92E,CTCF,cnc,
CHR2L	5304903	5305403	vri	gro,twi,bin,Trl,dl,N,Abd-B,cnc,Med,da,
CHR2L	5306341	5306841	vri	gro,twi,Su(H),sens,HDAC1,bin,su(Hw),Trl,dl,CG8478,prd,slp1,Hr78,N,EcR,HDAC3,cnc,Med,da,
CHR2L	531481	531981	ush	twi,dl,chinmo,da,
CHR2L	5431887	5432387	CR43713	gro,
CHR2L	544824	545324	nAcRbeta-21C	HDAC4a,twi,sens,HDAC1,Trl,dl,Sin3A,disco,HDAC6,HDAC3,sna,Med,da,
CHR2L	5458935	5459435	mid	GATAe,tin,twi,slp1,Mef2,
CHR2L	5461094	5461594	mid	CTCF,hth,HDAC1,mod(mdg4),GATAe,gro,Ubx,Tbp,tin,bon,twi,Mef2,yki,Stat92E,bab1,Trl,dl,kn,E(z),CG8478,gsb-n,prd,tll,Su(var)3-9,jumu,cad,z,Pcl,Dfd,disco,Dll,D,HDAC4a,hkb,brm,en,hb,Med,da,
CHR2L	5476798	5477298	mid	HDAC4a,sens,Trl,gro,cnc,jumu,disco,eve,bin,HDAC11,
CHR2L	5513831	5514331	CG14020	twi,su(Hw),
CHR2L	5520665	5521165	cl	Ubx,HDAC4a,twi,HDAC1,HDAC3,CBP,HDAC6,HDAC11,ttk,
CHR2L	553206	553706	Ets21C	Trl,Stat92E,
CHR2L	5542743	5543243	Lam	HDAC1,mod(mdg4),GATAe,CTCF,gro,Ubx,Tbp,HDAC4a,tin,twi,Mef2,Trl,Dfd,dl,E(z),CG8478,HDAC3,gsb-n,slp1,jumu,Sin3A,z,disco,h,Dll,Hr39,psq,dm,hb,Med,
CHR2L	559136	559636	CG2789	Tbp,HDAC1,CG8478,cnc,mod(mdg4),N,z,HDAC6,HDAC11,dm,CTCF,
CHR2L	5616337	5616837	CG14010	twi,dl,su(Hw),hb,da,
CHR2L	5739235	5739735	CG11147	twi,dl,Dll,da,
CHR2L	5773086	5773586	CG9171	CTCF,
CHR2L	5780669	5781169	CG31913	twi,da,
CHR2L	5800020	5800520	CG9171	CTCF,mod(mdg4),gro,lola,Tbp,twi,yki,HDAC1,bab1,Trl,dl,gsb-n,prd,Su(var)3-9,Hr78,N,Sin3A,CBP,Dfd,h,Dll,Abd-B,HDAC4a,HP1b,HDAC3,Eip74EF,hb,Med,da,
CHR2L	586457	586957	Gsc	dl,Pcl,cad,chinmo,HDAC4a,hb,
CHR2L	5889759	5890259	Acp26Ab	twi,dl,prd,Med,da,
CHR2L	5944748	5945248	Gpdh	gro,twi,yki,HDAC1,Trl,dl,Su(var)3-9,Mef2,ttk,Dll,CTCF,HDAC3,Med,da,
CHR2L	5961483	5961983	Vm26Aa	twi,Trl,dl,Su(var)3-9,Med,da,
CHR2L	5971298	5971798	CR43465	twi,
CHR2L	5974515	5975015	CR43465	-
CHR2L	5977489	5977989	chic	HDAC1,gro,HDAC11,Tbp,HDAC4a,twi,Su(H),Trl,trem,dl,fru,CG8478,prd,mod(mdg4),jumu,Lpt,Mef2,z,CBP,disco,EcR,Dll,HDAC3,sna,Med,da,
CHR2L	5978490	5978990	chic	gro,Tbp,bon,twi,Mef2,Su(H),sens,HDAC1,Trl,trem,dl,fru,prd,Su(var)3-9,mod(mdg4),jumu,Lpt,z,disco,h,ttk,HDAC4a,tin,sna,Med,da,
CHR2L	5980118	5980618	chic	CTCF,gro,bcd,HDAC11,Tbp,HDAC4a,tin,twi,Mef2,yki,Su(H),Stat92E,HDAC1,Trl,trem,Mad,dl,E(z),CG8478,gsb-n,prd,Lpt,cad,bap,Sin3A,z,h,Dll,HDAC3,cnc,Med,da,
CHR2L	5981871	5982371	eIF-4a	HDAC1,CTCF,gro,Ubx,HDAC11,Tbp,tin,bon,twi,yki,Su(H),sens,bab1,Trl,dl,kn,E(z),CG8478,prd,Su(var)3-9,Mef2,Sin3A,z,HDAC6,Dll,HDAC4a,dm,hb,cnc,Med,da,
CHR2L	5983084	5983584	eIF-4a	gro,bcd,HDAC11,Tbp,twi,Su(H),sens,HDAC1,Trl,dl,cnc,prd,HDAC3,Mef2,Sin3A,z,ttk,D,HDAC4a,hb,CTCF,CG8478,sna,Med,da,
CHR2L	5986948	5987448	ifc	HDAC1,Tbp,twi,sens,dl,bin,prd,slp1,Sin3A,ttk,HDAC3,Med,da,
CHR2L	6023004	6023504	CG9107	dl,HDAC3,
CHR2L	6047879	6048379	CG12393	Ubx,Tbp,HDAC4a,twi,HDAC1,bab1,Trl,dl,Hr78,Sin3A,br,HDAC6,HDAC3,hb,CTCF,sna,Med,da,cad,
CHR2L	6082989	6083489	Kr-h1	HDAC1,Su(H),cnc,bin,Trl,dl,CG8478,usp,
CHR2L	6084830	6085330	Kr-h1	Trl,cnc,
CHR2L	6085738	6086238	Kr-h1	bon,Trl,N,
CHR2L	6088474	6088974	Kr-h1	gro,Tbp,twi,Mef2,yki,Su(H),cnc,sens,HDAC1,su(Hw),Trl,dl,fru,CG8478,gsb-n,Lpt,D,N,z,kni,HDAC6,HDAC11,CG16778,EcR,Dll,Stat92E,HDAC4a,dm,Med,usp,da,
CHR2L	6098730	6099230	CG9175	Ubx,Tbp,twi,HDAC1,dl,su(Hw),HDAC3,Trl,Su(var)3-9,mod(mdg4),Sin3A,ftz,h,HDAC6,HDAC11,Mef2,HDAC4a,psq,dm,CTCF,Med,
CHR2L	6107606	6108106	stai	-
CHR2L	6127289	6127789	WDR79	HDAC11,HDAC4a,HDAC1,dl,E(z),HDAC3,Sin3A,HDAC6,ttk,
CHR2L	6188096	6188596	CG34380	prd,h,chinmo,
CHR2L	6222069	6222569	Ugt37b1	CTCF,twi,
CHR2L	6291520	6292020	CG43922	bin,gro,cad,bap,cnc,
CHR2L	6324299	6324799	Gef26	CTCF,gro,Tbp,twi,yki,Su(H),HDAC1,Trl,dl,fru,CG8478,HDAC3,Su(var)3-9,mod(mdg4),sc,zfh1,Hr78,N,Sin3A,Dfd,h,Dll,Abd-B,lola,dm,Eip74EF,Stat92E,Med,da,
CHR2L	6335377	6335877	Pez	HDAC3,cad,chinmo,
CHR2L	6340676	6341176	Cpr	cnc,zfh1,
CHR2L	6370986	6371486	slam	dl,chinmo,
CHR2L	6404206	6404706	CG42368	-
CHR2L	6422545	6423045	Tig	Mef2,bin,
CHR2L	6423075	6423575	Tig	Mef2,bin,Trl,mod(mdg4),cnc,
CHR2L	646966	647466	CG2839	-
CHR2L	6473278	6473778	mmy	HDAC1,CTCF,Tbp,twi,pan,Mef2,bin,dl,CG8478,gsb-n,N,Sin3A,Med,da,
CHR2L	6480712	6481212	DLP	HDAC1,Sin3A,mod(mdg4),CTCF,Ubx,HDAC11,Tbp,HDAC4a,twi,Mef2,sens,bab1,Trl,dl,kn,fru,E(z),CG8478,prd,tll,Su(var)3-9,Hr78,Lpt,N,z,HDAC6,dm,HDAC3,tin,hb,Med,da,
CHR2L	6494371	6494871	CG9547	gro,Trl,dl,HDAC3,CBP,chinmo,
CHR2L	6499559	6500059	CG31637	Mad,dl,slp1,ftz,h,chinmo,
CHR2L	6512272	6512772	CG31637	CBP,
CHR2L	6538399	6538899	eya	su(Hw),
CHR2L	6551004	6551504	eya	hth,en,
CHR2L	6612330	6612830	CG11050	mod(mdg4),HDAC11,Tbp,HDAC4a,twi,usp,HDAC1,Trl,trem,Dfd,dl,kn,E(z),CG8478,gsb-n,Su(var)3-9,slp1,cad,eve,h,HDAC6,Stat92E,dm,HDAC3,Med,da,
CHR2L	6627558	6628058	Oatp26F	su(Hw),
CHR2L	6644329	6644829	CG31635	Trl,psq,dl,cad,CBP,disco,
CHR2L	6645366	6645866	CG31635	twi,dl,ttk,psq,sna,Med,da,
CHR2L	6662421	6662921	CG13771	sens,ttk,chinmo,
CHR2L	6667711	6668211	Galt	gro,HDAC4a,twi,Su(H),HDAC1,Trl,dl,Su(var)3-9,slp1,pan,HDAC6,HDAC11,dm,HDAC3,Med,da,
CHR2L	6673082	6673582	Spn27A	HDAC1,gro,Ubx,HDAC4a,Trl,dl,Mef2,Sin3A,HDAC6,HDAC11,chinmo,dm,cnc,
CHR2L	6685659	6686159	CG11327	CTCF,twi,sens,dl,
CHR2L	669246	669746	CG2839	gro,twi,Dll,
CHR2L	6717414	6717914	CG11188	HDAC1,CTCF,Tbp,HDAC4a,su(Hw),dl,HDAC3,cnc,Su(var)3-9,mod(mdg4),Sin3A,disco,HDAC6,dm,
CHR2L	6768774	6769274	CG11321	chinmo,Hr39,
CHR2L	6780443	6780943	CG17378	CBP,
CHR2L	6785654	6786154	nrv1	CTCF,Trl,cnc,
CHR2L	681575	682075	ds	-
CHR2L	6823562	6824062	sens-2	HDAC1,
CHR2L	6833479	6833979	sens-2	tin,bon,twi,Su(H),HDAC1,Trl,dl,CG8478,Hr78,N,z,Pcl,Mef2,Dll,Abd-B,HDAC4a,da,
CHR2L	6835978	6836478	sens-2	-
CHR2L	698183	698683	ds	Dll,
CHR2L	7009329	7009829	uif	bcd,twi,HDAC1,dl,Trl,Su(var)3-9,mod(mdg4),disco,hb,sna,Med,da,
CHR2L	701667	702167	ds	HDAC1,mod(mdg4),gro,Tbp,twi,yki,Trl,dl,kn,Su(var)3-9,Dll,HDAC4a,Med,shn,da,cad,
CHR2L	7032358	7032858	Rab30	CTCF,HDAC1,GATAe,Ubx,lola,Tbp,HDAC4a,twi,sens,dl,HDAC3,jumu,Sin3A,CBP,disco,HDAC6,HDAC11,D,hkb,Med,
CHR2L	7035149	7035649	milt	HDAC3,chinmo,sna,
CHR2L	7038190	7038690	milt	HDAC1,CTCF,lola,Tbp,twi,dl,CG8478,Su(var)3-9,sc,zfh1,Hr78,pan,N,Sin3A,Dfd,HDAC6,HDAC4a,HDAC3,Eip74EF,Med,da,EcR,
CHR2L	7042928	7043428	milt	HDAC1,gro,twi,Mef2,sens,bin,Trl,dl,CG8478,cad,HDAC11,hth,Med,da,
CHR2L	7049345	7049845	milt	HDAC1,mod(mdg4),bcd,Tbp,twi,Trl,dl,gsb-n,prd,pan,cad,z,disco,eve,HDAC11,Mef2,dm,hb,cnc,Med,shn,da,
CHR2L	7050259	7050759	milt	HDAC1,twi,Trl,dl,CG8478,z,disco,Mef2,ttk,HDAC3,hb,Med,da,
CHR2L	7052755	7053255	milt	HDAC3,CBP,h,cad,chinmo,
CHR2L	7085952	7086452	Pvf2	Trl,HDAC4a,
CHR2L	7087556	7088056	Pvf2	-
CHR2L	7091174	7091674	Pvf2	-
CHR2L	7124956	7125456	Pvf3	hth,twi,sens,bin,da,
CHR2L	7136591	7137091	Pvf3	twi,disco,hkb,
CHR2L	7148768	7149268	Pvf3	hth,twi,sens,dl,cnc,eve,sna,da,
CHR2L	7155002	7155502	Pvf3	HDAC4a,sens,Mef2,Trl,HDAC11,
CHR2L	7157279	7157779	Pvf3	Tbp,twi,Mef2,bin,dl,mod(mdg4),E(z),Med,da,
CHR2L	7188433	7188933	CG4496	gro,bon,yki,Su(H),usp,HDAC1,Trl,su(Hw),Dfd,dl,Mef2,eve,HDAC11,Dll,
CHR2L	7189595	7190095	CG4496	dl,
CHR2L	7207727	7208227	CG4502	su(Hw),HDAC3,
CHR2L	7213529	7214029	CG13784	twi,D,sbb,
CHR2L	7217855	7218355	CG13784	twi,dl,cad,Med,da,
CHR2L	7240178	7240678	Ndae1	CTCF,
CHR2L	7242086	7242586	Ndae1	cnc,
CHR2L	7294079	7294579	wg	twi,gro,cnc,Trl,en,da,
CHR2L	7294785	7295285	wg	twi,dl,cnc,prd,CBP,HDAC11,en,tin,Med,da,
CHR2L	7311450	7311950	wg	hth,Kr,tin,twi,dl,prd,slp1,Mef2,ftz,hb,sna,Med,da,
CHR2L	7325387	7325887	Wnt6	-
CHR2L	7339597	7340097	Wnt6	HDAC1,Mef2,
CHR2L	7422098	7422598	CR43857	CTCF,gro,Trl,su(Hw),dl,CG8478,Hr78,N,EcR,HDAC3,
CHR2L	7423668	7424168	CR43857	CTCF,GATAe,gro,Trl,dl,CG8478,N,CBP,Pcl,HDAC11,h,dm,brm,
CHR2L	7424247	7424747	CR43857	HDAC1,GATAe,CTCF,Su(H),Trl,dl,CG8478,Hr78,N,CBP,psq,lola,
CHR2L	7425024	7425524	CR43857	HDAC1,Su(H),usp,Trl,psq,dl,CG8478,Su(var)3-9,N,EcR,
CHR2L	7433292	7433792	CG5958	-
CHR2L	7486281	7486781	CG42533	EcR,
CHR2L	749360	749860	GABA-B-R3	su(Hw),
CHR2L	7570775	7571275	Rapgap1	HDAC1,
CHR2L	7580449	7580949	Spn7	-
CHR2L	7613550	7614050	CG6739	-
CHR2L	7678106	7678606	Myo28B1	cnc,
CHR2L	7701483	7701983	Tep2	HDAC1,yki,Su(H),Trl,dl,Su(var)3-9,sbb,
CHR2L	772673	773173	CG12506	CBP,su(Hw),
CHR2L	7790763	7791263	CG7149	Trl,dl,Su(H),HDAC11,HDAC6,dm,HDAC3,
CHR2L	7795561	7796061	LKR	Trl,HDAC3,CBP,
CHR2L	7799652	7800152	Herp	HDAC1,mod(mdg4),CTCF,Tbp,HDAC4a,twi,yki,trem,dl,kn,E(z),HDAC3,Trl,tll,Ubx,eve,Sin3A,br,HDAC6,HDAC11,dm,cnc,sna,Med,EcR,
CHR2L	7809535	7810035	cdc14	HDAC1,mod(mdg4),CTCF,gro,Tbp,bon,twi,Mef2,yki,Su(H),cnc,Trl,dl,CG8478,Hr78,N,Dll,Abd-B,
CHR2L	7814647	7815147	LanB1	HDAC3,ttk,
CHR2L	7821245	7821745	CG7115	HDAC1,Tbp,twi,trem,dl,Sin3A,z,HDAC11,HDAC6,
CHR2L	7828665	7829165	mts	HDAC1,CTCF,gro,Tbp,twi,Mef2,yki,Su(H),Trl,dl,CG8478,Su(var)3-9,mod(mdg4),sc,Hr78,pan,Lpt,N,Sin3A,br,Dll,Stat92E,Abd-B,HDAC4a,HDAC3,Eip74EF,hb,E(z),sna,Med,da,
CHR2L	7854447	7854947	CG14535	CTCF,dl,HDAC4a,Med,sbb,
CHR2L	7859639	7860139	TwdlE	CTCF,twi,slp1,da,
CHR2L	7870833	7871333	Proct	-
CHR2L	788602	789102	Pkg21D	chinmo,
CHR2L	789887	790387	Pkg21D	bon,Trl,chinmo,
CHR2L	7913459	7913959	Spn28Db	Mef2,hth,
CHR2L	7914720	7915220	Spn28Db	gro,twi,Mef2,Trl,br,D,Hr39,
CHR2L	7957056	7957556	Snoo	CTCF,EcR,
CHR2L	7960710	7961210	Snoo	Trl,cnc,
CHR2L	7961212	7961712	Snoo	Trl,CG8478,cnc,
CHR2L	7973173	7973673	Snoo	gro,bon,
CHR2L	7976570	7977070	Snoo	gro,lola,Tbp,bon,pan,Trl,Dfd,dl,dm,CG8478,Hr78,Lpt,N,CBP,Abd-B,Hr39,Eip74EF,Stat92E,HP1b,
CHR2L	7990122	7990622	pes	Trl,cnc,
CHR2L	7993022	7993522	pes	HDAC1,twi,Trl,gro,dl,Mef2,gsb-n,prd,CBP,ttk,HDAC4a,HDAC3,cnc,sna,Med,
CHR2L	7994457	7994957	pes	HDAC1,mod(mdg4),gro,HDAC11,Tbp,HDAC4a,twi,Mef2,yki,Su(H),bin,bab1,Trl,dl,E(z),gsb-n,prd,tll,Su(var)3-9,en,Lpt,cad,Sin3A,insv,HDAC6,eve,D,dm,tin,Med,da,
CHR2L	8007338	8007838	Spn28D	gro,twi,Trl,da,
CHR2L	8083454	8083954	Bsg	HDAC1,CTCF,gro,Ubx,Tbp,twi,yki,Su(H),Stat92E,Trl,dl,Mef2,su(Hw),CG8478,Su(var)3-9,mod(mdg4),sc,zfh1,Hr78,Lpt,N,Sin3A,z,CBP,Dfd,h,HDAC11,Dll,Abd-B,HDAC4a,lola,HDAC3,tin,Eip74EF,Med,da,
CHR2L	8084558	8085058	Bsg	gro,lola,bon,Su(H),cnc,sens,HDAC1,su(Hw),Trl,dl,CG8478,mod(mdg4),zfh1,Hr78,Lpt,N,CBP,Dfd,HDAC11,ttk,Abd-B,HDAC3,Med,
CHR2L	8085415	8085915	Bsg	CTCF,sens,HDAC1,su(Hw),Trl,dl,mod(mdg4),CBP,HDAC11,
CHR2L	8086206	8086706	Bsg	Trl,su(Hw),dl,Kr,da,
CHR2L	8087328	8087828	Bsg	twi,su(Hw),dl,cnc,sna,Med,da,
CHR2L	8097293	8097793	Bsg	bab1,
CHR2L	8100808	8101308	Bsg	twi,gro,dl,cad,Lpt,eve,Trl,Med,da,
CHR2L	8102539	8103039	Bsg	dm,Pcl,pan,chinmo,Hr39,Trl,
CHR2L	8129078	8129578	CG8668	Kr,
CHR2L	8163961	8164461	Piezo	HDAC1,twi,Trl,gro,dl,Mef2,cnc,Med,da,
CHR2L	8171475	8171975	Piezo	Trl,
CHR2L	820197	820697	Clp	CTCF,HDAC11,Tbp,HDAC4a,HDAC1,dl,HDAC3,Sin3A,HDAC6,chinmo,twi,Med,
CHR2L	8218203	8218703	CG8292	sens,HDAC3,
CHR2L	8229516	8230016	Pvr	HDAC4a,Trl,CBP,eve,HDAC11,
CHR2L	8230764	8231264	Pvr	-
CHR2L	8237705	8238205	Pvr	HDAC1,HDAC4a,ttk,
CHR2L	8238826	8239326	Pvr	HDAC1,dl,mod(mdg4),eve,ttk,cnc,
CHR2L	825650	826150	CG3862	CTCF,mod(mdg4),Tbp,HDAC4a,twi,HDAC1,Trl,dl,E(z),CG8478,prd,Su(var)3-9,HDAC3,N,Sin3A,HDAC6,HDAC11,Mef2,D,dm,Med,da,
CHR2L	8292101	8292601	tRNA:K5:29A	Trl,gro,cnc,Su(var)3-9,eve,HDAC11,hth,
CHR2L	8299370	8299870	Btk29A	HDAC1,gro,Trl,dl,CBP,Dll,psq,
CHR2L	8300314	8300814	Btk29A	CTCF,HDAC1,GATAe,Tbp,HDAC4a,twi,Stat92E,Trl,dl,Sin3A,disco,HDAC6,D,hkb,Med,da,
CHR2L	8311260	8311760	CG7806	HDAC1,CTCF,HDAC4a,sens,dl,HDAC6,HDAC11,ttk,D,HDAC3,Med,
CHR2L	8342511	8343011	CG14273	-
CHR2L	8353896	8354396	Mur29B	sens,
CHR2L	8385542	8386042	CG13384	twi,dl,HDAC3,Med,da,
CHR2L	8398213	8398713	CG13386	-
CHR2L	841828	842328	drongo	HDAC4a,
CHR2L	8418730	8419230	Akap200	gro,twi,sens,HDAC1,Trl,dl,da,
CHR2L	8419453	8419953	Akap200	HDAC1,gro,Su(H),sens,Trl,dl,Lpt,disco,D,HDAC4a,hth,
CHR2L	8421927	8422427	Akap200	twi,Trl,dl,pan,Mef2,
CHR2L	8423791	8424291	Akap200	Tbp,Mef2,HDAC1,Trl,dl,mod(mdg4),z,HDAC11,HDAC4a,HDAC6,dm,
CHR2L	8425654	8426154	Akap200	GATAe,sens,dl,sbb,da,
CHR2L	843053	843553	drongo	CBP,
CHR2L	845931	846431	drongo	gro,HDAC4a,dl,Trl,eve,HDAC11,Stat92E,Med,
CHR2L	8461982	8462482	fu12	sens,cnc,
CHR2L	846998	847498	CR44060	Snr1,hth,Trl,brm,
CHR2L	8517207	8517707	CG13090	HDAC1,Ubx,Tbp,HDAC4a,twi,dl,HDAC3,Sin3A,HDAC6,hb,Med,
CHR2L	852940	853440	kraken	Tbp,HDAC4a,HDAC1,dl,HDAC3,Su(H),Su(var)3-9,Sin3A,HDAC6,HDAC11,ttk,chinmo,dm,cnc,Med,
CHR2L	8613954	8614454	tRNA:CR31602	-
CHR2L	8639349	8639849	tRNA:CR31602	E(z),
CHR2L	8645547	8646047	tRNA:CR31602	-
CHR2L	8646108	8646608	Glt	-
CHR2L	865682	866182	aru	HDAC4a,usp,HDAC1,Trl,dl,eve,HDAC11,Med,da,EcR,
CHR2L	866746	867246	aru	gro,bcd,HDAC4a,bon,twi,HDAC1,Trl,dl,CG8478,Su(var)3-9,zfh1,slp1,Stat92E,N,HDAC11,sna,Med,da,
CHR2L	8702049	8702549	Hnf4	twi,cnc,CTCF,
CHR2L	8738213	8738713	raw	Trl,cad,pan,eve,HDAC4a,hth,
CHR2L	8783074	8783574	CG42710	-
CHR2L	8832901	8833401	SoxN	bcd,twi,sens,dl,prd,cad,kni,hb,sna,Med,shn,da,
CHR2L	8835068	8835568	SoxN	slp1,HDAC11,
CHR2L	8850000	8850500	CG32986	twi,Mad,dl,cnc,prd,ftz,sna,Med,shn,da,
CHR2L	8887000	8887500	CG42713	cnc,
CHR2L	8914949	8915449	CG34398	-
CHR2L	8924717	8925217	Tsp29Fa	-
CHR2L	892944	893444	Lsp1beta	chinmo,
CHR2L	8944476	8944976	CG9510	-
CHR2L	8947041	8947541	C1GalTA	sens,
CHR2L	895287	895787	Lsp1beta	Trl,su(Hw),
CHR2L	8966678	8967178	CG18088	-
CHR2L	8997122	8997622	alien	CTCF,HDAC1,Ubx,Tbp,HDAC4a,yki,trem,dl,Trl,Sin3A,HDAC6,HDAC11,dm,HDAC3,Med,
CHR2L	9037241	9037741	CG9582	su(Hw),
CHR2L	9079269	9079769	CG12439	-
CHR2L	9139648	9140148	CG32982	-
CHR2L	9143063	9143563	CG32982	-
CHR2L	9179122	9179622	tai	HDAC1,CTCF,gro,Trl,dl,N,eve,
CHR2L	9180775	9181275	tai	-
CHR2L	9182770	9183270	tai	Trl,su(Hw),Su(var)3-9,
CHR2L	918475	918975	CG4341	HDAC4a,chinmo,
CHR2L	9189928	9190428	tai	bin,Trl,dl,bap,eve,Mef2,tin,
CHR2L	9200803	9201303	tai	-
CHR2L	9205262	9205762	tai	gro,yki,Su(H),HDAC1,Trl,dl,CG8478,bap,N,Dll,psq,EcR,
CHR2L	9215658	9216158	tRNA:CR31885	-
CHR2L	9229475	9229975	tRNA:CR31885	twi,Trl,
CHR2L	9230836	9231336	tRNA:CR31885	-
CHR2L	9231841	9232341	tRNA:CR31885	-
CHR2L	9237489	9237989	tRNA:CR31885	gro,Su(H),Trl,su(Hw),CG8478,N,EcR,Dll,Abd-B,
CHR2L	9244336	9244836	aust	HDAC3,Dfd,Pcl,
CHR2L	9286707	9287207	CG42844	su(Hw),
CHR2L	9354064	9354564	CG13110	-
CHR2L	9387821	9388321	Aldh	twi,dl,usp,eve,HDAC4a,su(Hw),dm,cnc,da,
CHR2L	9459704	9460204	numb	GATAe,CTCF,tin,twi,HDAC1,dl,fru,jumu,Lpt,disco,h,hkb,
CHR2L	9497294	9497794	CG33298	twi,dl,pan,cad,HDAC11,Trl,hb,cnc,Med,
CHR2L	9498298	9498798	CG33298	twi,dl,cad,pan,eve,HDAC11,hth,
CHR2L	9516638	9517138	Oatp30B	HDAC3,CBP,
CHR2L	9568461	9568961	CR44149	CTCF,gro,Tbp,HDAC4a,twi,Mef2,yki,Su(H),cnc,HDAC1,bin,bab1,Trl,dl,E(z),CG8478,tll,sc,zfh1,slp1,Hr78,Lpt,Dfd,eve,N,z,HDAC11,Abd-B,lola,Eip74EF,hb,sna,Med,da,
CHR2L	9569385	9569885	CG3838	CTCF,Tbp,twi,Mef2,cnc,HDAC1,bin,Trl,Dfd,dl,eve,N,z,HDAC11,CG16778,hb,sna,Med,da,
CHR2L	9593370	9593870	CG3841	gro,
CHR2L	9598267	9598767	CG4382	HDAC4a,twi,gro,slp1,HDAC11,da,
CHR2L	9613736	9614236	Trx-2	HDAC1,CTCF,Tbp,twi,yki,cnc,Trl,dl,prd,Su(var)3-9,mod(mdg4),zfh1,Hr78,HDAC4a,tin,hb,Med,
CHR2L	9632816	9633316	CG15828	-
CHR2L	9668432	9668932	CR44150	su(Hw),
CHR2L	9670927	9671427	CR44150	-
CHR2L	9679418	9679918	CR44150	-
CHR2L	9685865	9686365	Pka-C1	dl,Med,
CHR2L	9691196	9691696	Pka-C1	CBP,eve,
CHR2L	9698575	9699075	Pka-C1	HDAC1,Tbp,twi,sens,Trl,dl,CG8478,Su(var)3-9,zfh1,Hr78,N,Sin3A,Dfd,Abd-B,hb,E(z),HDAC3,sna,Med,
CHR2L	9707437	9707937	CG31710	Mef2,HDAC3,cnc,
CHR2L	9736301	9736801	CG13117	Trl,ttk,brm,
CHR2L	9737658	9738158	CG13117	Trl,
CHR2L	974147	974647	CG4341	dl,slp1,hth,
CHR2L	9776618	9777118	ppk11	CTCF,gro,twi,su(Hw),Trl,trem,prd,mod(mdg4),
CHR2L	9777949	9778449	ppk11	twi,prd,
CHR2L	9779798	9780298	IP3K1	-
CHR2L	9782023	9782523	IP3K1	GATAe,gro,Tbp,twi,yki,Su(H),Trl,dl,Su(var)3-9,insv,Dll,CTCF,cnc,EcR,
CHR2L	9785747	9786247	IP3K1	-
CHR2L	9800017	9800517	CG13123	-
CHR2L	9819558	9820058	CG13123	-
CHR2L	9886916	9887416	nAcRalpha-30D	CTCF,bab1,su(Hw),mod(mdg4),HDAC3,
CHR2L	9907424	9907924	CG13124	twi,Mef2,Trl,dl,CG8478,N,hb,
CHR2L	9908300	9908800	CG13124	gro,Mef2,Su(H),Trl,dl,HDAC3,
CHR2L	9912146	9912646	Etl1	Sin3A,Ubx,Tbp,HDAC4a,twi,HDAC1,Trl,dl,jumu,kni,HDAC6,HDAC11,D,HDAC3,CTCF,Med,
CHR2L	9961765	9962265	CR43683	HDAC3,ttk,chinmo,
CHR2L	9972499	9972999	Dref	twi,
CHR2L	9986082	9986582	CG13130	sens,dl,Su(var)3-9,HDAC11,
CHR2R	10022172	10022672	Prosap	CG8478,
CHR2R	10060920	10061420	cg	CTCF,HDAC1,HDAC11,Tbp,twi,Mef2,cnc,bin,dl,fru,CG8478,HDAC3,Trl,Hr78,N,Sin3A,z,HDAC6,D,Abd-B,HDAC4a,dm,Med,da,
CHR2R	10061890	10062390	cg	HDAC1,gro,Tbp,HDAC4a,Snr1,twi,Mef2,cnc,bin,su(Hw),dl,fru,CG8478,HDAC3,Su(H),Trl,mod(mdg4),sc,zfh1,Hr78,cad,N,Sin3A,z,HDAC6,CG16778,Abd-B,lola,tin,Med,da,
CHR2R	10062823	10063323	cg	HDAC1,mod(mdg4),Tbp,Snr1,twi,Mef2,bin,su(Hw),Trl,dl,fru,CG8478,cnc,sc,zfh1,Hr78,cad,N,Sin3A,Dfd,h,Abd-B,HDAC4a,lola,dm,HDAC3,Eip74EF,Med,da,
CHR2R	10072789	10073289	CG30069	gro,Su(H),Trl,dl,Su(var)3-9,N,Abd-B,h,
CHR2R	10099639	10100139	Sox15	gro,Trl,Su(var)3-9,Dll,
CHR2R	10104620	10105120	RpS23	CTCF,Ubx,twi,cnc,HDAC1,bab1,dl,kn,cad,mod(mdg4),Sin3A,CBP,HDAC6,HDAC11,HDAC4a,dm,Med,
CHR2R	10107601	10108101	CG8468	gro,twi,Mef2,HDAC1,dl,N,z,CG8478,Med,
CHR2R	10110045	10110545	CG8468	sens,Mef2,da,
CHR2R	10123985	10124485	opa1-like	HDAC3,z,chinmo,
CHR2R	10143106	10143606	Hsc70-5	CTCF,Ubx,Tbp,HDAC4a,twi,HDAC1,Trl,dl,Su(var)3-9,mod(mdg4),cad,HDAC3,Mef2,Sin3A,kni,disco,HDAC6,HDAC11,ttk,dm,Med,
CHR2R	10177474	10177974	Ih	twi,Med,da,
CHR2R	10186545	10187045	tej	-
CHR2R	10191778	10192278	tej	-
CHR2R	10209898	10210398	Shroom	twi,CG8478,Med,
CHR2R	10228404	10228904	Shroom	hth,
CHR2R	10278114	10278614	CG10104	-
CHR2R	10298802	10299302	CG17385	HDAC1,CTCF,Ubx,Tbp,twi,sens,Trl,trem,dl,HDAC3,tll,Sin3A,CBP,HDAC6,HDAC11,D,HDAC4a,dm,Med,
CHR2R	10332412	10332912	Oaz	CTCF,
CHR2R	10345366	10345866	Oaz	CTCF,mod(mdg4),Tbp,bon,twi,yki,HDAC1,Trl,dl,dm,E(z),CG8478,sc,zfh1,Hr78,Lpt,N,Dfd,h,pan,Mef2,Dll,Stat92E,Abd-B,HDAC4a,Hr39,lola,Eip74EF,Med,da,
CHR2R	10373450	10373950	L	twi,bin,Trl,pan,cad,eve,hth,E(z),
CHR2R	10378183	10378683	L	psq,Trl,cnc,
CHR2R	10381816	10382316	Cpsf160	CTCF,cnc,
CHR2R	10404406	10404906	Cpr51A	-
CHR2R	10405605	10406105	Cpr51A	twi,dl,
CHR2R	10414097	10414597	ttv	HDAC1,CTCF,gro,Ubx,Tbp,HDAC4a,twi,yki,Su(H),Trl,dl,CG8478,Hr78,N,Sin3A,kni,HDAC6,HDAC11,Dll,hkb,Abd-B,lola,dm,brm,Eip74EF,Med,
CHR2R	10421002	10421502	ttv	-
CHR2R	10460284	10460784	LamC	Mef2,
CHR2R	10479220	10479720	CG12869	Su(var)3-9,HDAC11,hkb,su(Hw),
CHR2R	10488494	10488994	blos1	HDAC1,mod(mdg4),GATAe,HDAC11,Tbp,HDAC4a,twi,sens,dl,E(z),HDAC3,jumu,Sin3A,disco,HDAC6,D,hkb,dm,Med,
CHR2R	10490665	10491165	snoRNA:tra2-a	twi,sens,dl,HDAC3,HDAC11,
CHR2R	10542330	10542830	Adgf-E	CTCF,su(Hw),
CHR2R	1056369	1056869	Atf6	-
CHR2R	10574593	10575093	CG30480	-
CHR2R	10605025	10605525	mspo	Trl,
CHR2R	10639524	10640024	Rpn6	CTCF,HDAC1,Sin3A,GATAe,bcd,Tbp,cnc,sens,Trl,dl,kn,HDAC3,Ubx,z,br,HDAC6,HDAC11,HDAC4a,Med,
CHR2R	10654465	10654965	Spred	su(Hw),
CHR2R	10667803	10668303	BEAF-32	HDAC1,z,
CHR2R	10669741	10670241	BEAF-32	-
CHR2R	10732806	10733306	NaPi-T	sens,D,HDAC3,
CHR2R	10735344	10735844	CG10209	HDAC1,mod(mdg4),sens,Trl,dl,CG8478,HDAC3,Su(var)3-9,N,Sin3A,HDAC6,Abd-B,lola,Med,
CHR2R	10786699	10787199	Cyp317a1	sens,dl,cad,Trl,Med,
CHR2R	10851777	10852277	ckn	hth,HDAC1,gro,Tbp,tin,bon,twi,Mef2,yki,Su(H),Trl,dl,bin,Su(var)3-9,Lpt,cad,bap,insv,eve,HDAC11,Dll,HDAC4a,Med,da,
CHR2R	10888187	10888687	CR43830	twi,HDAC11,su(Hw),
CHR2R	10932736	10933236	CR43622	tin,
CHR2R	10983242	10983742	chn	-
CHR2R	11022841	11023341	chn	gro,bon,Su(H),HDAC1,Trl,dl,insv,Dll,h,
CHR2R	11024859	11025359	Rpb12	Trl,
CHR2R	11090000	11090500	CG42391	HDAC3,
CHR2R	11127258	11127758	Fs	HDAC4a,
CHR2R	11140564	11141064	scb	gro,sens,Trl,dl,prd,Dll,
CHR2R	11147522	11148022	alphaPS4	sens,
CHR2R	11178034	11178534	trpm	HDAC4a,HDAC1,su(Hw),Trl,Su(var)3-9,HDAC6,eve,HDAC11,dm,
CHR2R	1119569	1120069	Nipped-A	-
CHR2R	11210208	11210708	Arf51F	gro,Ubx,Tbp,twi,Su(H),HDAC1,Trl,trem,dl,prd,Su(var)3-9,cad,N,Sin3A,z,h,HDAC11,HDAC3,hb,CTCF,Med,
CHR2R	11236980	11237480	unc-5	hth,HDAC1,GATAe,gro,Tbp,HDAC4a,tin,twi,Mef2,yki,Su(H),bab1,Trl,dl,su(Hw),CG8478,gsb-n,tll,pan,Lpt,eve,CBP,disco,HDAC6,HDAC11,Dll,D,brm,Med,da,
CHR2R	11240901	11241401	unc-5	HDAC4a,tin,twi,HDAC1,Trl,dl,Su(var)3-9,cad,Mef2,CTCF,Med,da,
CHR2R	11267916	11268416	SRPK	CTCF,HDAC1,Ubx,HDAC11,Tbp,HDAC4a,twi,Trl,dl,CG8478,tll,jumu,Mef2,Sin3A,hkb,D,HDAC6,Hr39,dm,HDAC3,hb,Med,da,
CHR2R	11313671	11314171	CG43729	-
CHR2R	11361483	11361983	CG8180	-
CHR2R	11366500	11367000	CG8180	twi,
CHR2R	11438624	11439124	CG8192	z,
CHR2R	11501282	11501782	CG42524	gro,yki,Trl,dl,Su(var)3-9,N,Pcl,EcR,Dll,Abd-B,
CHR2R	11542097	11542597	fus	Trl,
CHR2R	11616743	11617243	CG30089	su(Hw),mod(mdg4),
CHR2R	11620755	11621255	CG30089	CTCF,hth,twi,dl,Pcl,
CHR2R	11631900	11632400	CG30089	twi,da,
CHR2R	11632846	11633346	CG30089	HDAC4a,twi,dl,HDAC11,
CHR2R	11673452	11673952	Zasp52	E(z),
CHR2R	11689422	11689922	Zasp52	twi,Trl,cad,
CHR2R	11702970	11703470	Zasp52	CTCF,dl,
CHR2R	11748753	11749253	Gpo-1	Su(H),Trl,su(Hw),dl,CG8478,HDAC3,CTCF,
CHR2R	11750176	11750676	Gpo-1	HDAC1,Trl,dl,
CHR2R	11750695	11751195	Gpo-1	HDAC1,Trl,dl,
CHR2R	11784490	11784990	CG33463	tll,bcd,twi,sens,dl,cad,disco,hth,hb,sna,Med,da,
CHR2R	1179496	1179996	d4	HP1b,
CHR2R	11818287	11818787	bdg	gro,Tbp,twi,sens,HDAC1,Trl,dl,tll,HDAC11,HDAC4a,hkb,HDAC3,Med,da,
CHR2R	11822291	11822791	CG8297	CTCF,Tbp,HDAC4a,twi,sens,HDAC1,dl,HDAC3,slp1,N,Sin3A,Dfd,HDAC6,D,hkb,Hr78,CG8478,Med,
CHR2R	11885652	11886152	ATPCL	HDAC3,
CHR2R	11886861	11887361	ATPCL	HDAC1,HDAC6,HDAC4a,HDAC11,HDAC3,
CHR2R	11888007	11888507	CG8370	HDAC1,GATAe,sens,su(Hw),Trl,dl,E(z),Su(var)3-9,mod(mdg4),N,z,disco,HDAC3,cnc,
CHR2R	11898695	11899195	CG8388	HDAC1,Ubx,Tbp,HDAC4a,twi,Trl,dl,HDAC3,jumu,Sin3A,HDAC6,HDAC11,D,cnc,sna,Med,da,
CHR2R	11902058	11902558	Prosbeta1	CTCF,HDAC1,lola,Tbp,HDAC4a,twi,cnc,Trl,trem,dl,HDAC3,Hr78,N,Sin3A,Dfd,HDAC6,HDAC11,Mef2,Abd-B,dm,Eip74EF,sens,Med,EcR,
CHR2R	11957375	11957875	CR43415	CG8478,
CHR2R	11975246	11975746	CR43415	dl,HDAC3,CBP,
CHR2R	11981602	11982102	Dg	twi,
CHR2R	11990264	11990764	Rho1	HDAC1,gro,Tbp,HDAC4a,bon,twi,Mef2,yki,Su(H),cnc,Trl,dl,CG8478,HDAC3,tll,Su(var)3-9,mod(mdg4),Ubx,sc,zfh1,Hr78,Lpt,Dfd,bap,N,Sin3A,z,HDAC11,Dll,Abd-B,HDAC6,lola,tin,Eip74EF,hb,CTCF,Med,da,
CHR2R	11992047	11992547	Rho1	mod(mdg4),gro,Tbp,bon,Mef2,yki,HDAC1,Trl,dl,E(z),CG8478,zfh1,Hr78,bap,N,ttk,Dll,HDAC3,cnc,Med,
CHR2R	12013516	12014016	spin	Trl,dl,cnc,pan,
CHR2R	12016324	12016824	spin	gro,usp,Trl,dl,CG8478,hkb,cnc,EcR,
CHR2R	12017332	12017832	spin	HDAC1,gro,bon,Mef2,yki,Su(H),bin,Trl,dl,Su(var)3-9,CG8478,Dll,cnc,
CHR2R	12037832	12038332	lbk	HDAC1,GATAe,Ubx,Tbp,twi,Mef2,sens,bin,Trl,trem,dl,E(z),CG8478,Su(var)3-9,zfh1,slp1,pan,Lpt,cad,bap,N,Sin3A,Dfd,disco,HDAC4a,Hr39,hkb,HDAC3,tin,Eip74EF,Hr78,cnc,Med,
CHR2R	12047386	12047886	CG10734	mod(mdg4),gro,twi,HDAC1,dl,CG8478,N,Dfd,Abd-B,HDAC4a,Eip74EF,Hr78,E(z),Med,
CHR2R	12048948	12049448	CG10734	hth,twi,dl,bin,CG8478,eve,
CHR2R	12050923	12051423	CG10734	Mef2,dl,bap,
CHR2R	12075082	12075582	clu	HDAC1,gro,Tbp,twi,Mef2,yki,Su(H),Trl,dl,bin,CG8478,Su(var)3-9,Lpt,bap,N,z,HDAC11,EcR,tin,sna,Med,usp,da,
CHR2R	12085726	12086226	CG8446	HDAC3,ttk,chinmo,
CHR2R	12097836	12098336	mrj	HDAC1,gro,yki,Su(H),Trl,dl,CG8478,eve,D,psq,da,
CHR2R	12108456	12108956	CR43898	HDAC1,CTCF,Ubx,Tbp,HDAC4a,twi,yki,Trl,dl,CG8478,jumu,cad,disco,HDAC6,Med,da,EcR,
CHR2R	12113487	12113987	Tsf3	Trl,cnc,
CHR2R	12186619	12187119	CG43265	chinmo,
CHR2R	12194865	12195365	Nox	CBP,chinmo,
CHR2R	12224008	12224508	Vha44	CTCF,HDAC1,mod(mdg4),Ubx,Tbp,HDAC4a,twi,Mef2,sens,Trl,trem,dl,su(Hw),en,jumu,Sin3A,disco,HDAC6,HDAC11,hkb,dm,Hr78,Med,da,
CHR2R	12254719	12255219	CG15711	su(Hw),dl,
CHR2R	12299988	12300488	Menl-2	-
CHR2R	12362243	12362743	CheB53b	-
CHR2R	12394300	12394800	Sema-2a	-
CHR2R	12459691	12460191	CG4927	CTCF,su(Hw),bab1,kn,cnc,mod(mdg4),dm,
CHR2R	12465268	12465768	CG8317	mod(mdg4),z,
CHR2R	12469521	12470021	Cdk4	CTCF,twi,HDAC1,Trl,dl,da,
CHR2R	12470832	12471332	RpLP2	CTCF,mod(mdg4),GATAe,gro,Tbp,tin,twi,yki,Su(H),HDAC1,Trl,dl,E(z),Hr78,pan,z,Mef2,D,HDAC4a,Med,da,
CHR2R	12481668	12482168	CG8306	CTCF,HDAC1,mod(mdg4),GATAe,gro,Tbp,HDAC4a,twi,bin,bab1,Trl,psq,dl,CG8478,zfh1,Hr78,Stat92E,Lpt,N,Mef2,Dfd,HDAC11,lola,dm,Eip74EF,Kr,hb,Med,da,
CHR2R	12485530	12486030	CG5089	-
CHR2R	1253338	1253838	CR42646	HP1b,
CHR2R	12540005	12540505	Amyrel	-
CHR2R	12547155	12547655	Picot	CTCF,su(Hw),mod(mdg4),HDAC4a,
CHR2R	12551299	12551799	Picot	-
CHR2R	12578374	12578874	CG5210	su(Hw),Trl,psq,eve,
CHR2R	12597091	12597591	CG5210	-
CHR2R	12671657	12672157	CG5522	hth,HDAC1,HDAC11,HDAC4a,tin,twi,dl,E(z),prd,mod(mdg4),slp1,Mef2,ttk,HDAC3,hb,Med,da,
CHR2R	12673233	12673733	CG5522	tin,twi,dl,slp1,pan,cad,HDAC11,hkb,hb,sna,Med,da,
CHR2R	12674370	12674870	CG5522	dl,
CHR2R	12705210	12705710	CR43417	-
CHR2R	12706213	12706713	CR43417	cnc,
CHR2R	12716217	12716717	CR43650	gro,bcd,Tbp,twi,HDAC1,Trl,dl,CG8478,Su(var)3-9,z,insv,HDAC4a,dm,Med,da,
CHR2R	12717944	12718444	CR43650	Tbp,twi,HDAC1,dl,HDAC3,Trl,tll,Sin3A,CBP,h,HDAC11,HDAC4a,cnc,Med,da,
CHR2R	12727285	12727785	Ugt37c1	HDAC4a,HDAC1,dl,HDAC6,
CHR2R	12743855	12744355	Dek	HDAC1,CTCF,gro,Tbp,twi,Mef2,yki,Su(H),Trl,dl,kn,bin,CG8478,HDAC3,tll,Su(var)3-9,slp1,pan,Sin3A,br,HDAC11,hb,Med,da,
CHR2R	12769306	12769806	CG6472	-
CHR2R	12807734	12808234	Pkc53E	mod(mdg4),gro,su(Hw),trem,dm,
CHR2R	12894093	12894593	CG6805	HDAC1,HDAC3,
CHR2R	12896005	12896505	CG6805	HDAC3,CG8478,
CHR2R	12910505	12911005	Ark	HDAC3,
CHR2R	12930686	12931186	CG9640	HDAC3,
CHR2R	12936476	12936976	CG9646	HDAC1,dl,HDAC6,ttk,D,HDAC11,
CHR2R	12941261	12941761	fat-spondin	HDAC3,
CHR2R	12947761	12948261	CG8950	HDAC3,
CHR2R	12978904	12979404	Sply	HDAC1,GATAe,Ubx,HDAC11,HDAC4a,Trl,jumu,Sin3A,HDAC6,ttk,EcR,D,hkb,cnc,da,
CHR2R	12990096	12990596	CG30456	gro,Su(H),Trl,Dll,
CHR2R	12992696	12993196	CG30456	CTCF,
CHR2R	12998498	12998998	CG15611	-
CHR2R	13022996	13023496	Gbp	Trl,
CHR2R	13031740	13032240	tRNA:CR30234	mod(mdg4),tin,twi,Mef2,sens,su(Hw),dl,gsb-n,cad,z,HDAC6,cnc,
CHR2R	13039517	13040017	CG17290	-
CHR2R	13135109	13135609	CG12699	-
CHR2R	13147119	13147619	CG43108	GATAe,z,disco,
CHR2R	13149246	13149746	mbl	mod(mdg4),gro,HDAC4a,Mef2,Su(H),sens,HDAC1,Trl,dl,gsb-n,CG8478,z,HDAC11,Dll,brm,tin,
CHR2R	13157507	13158007	mbl	Trl,Mef2,eve,
CHR2R	13159115	13159615	mbl	eve,
CHR2R	131593	132093	IntS3	HP1b,
CHR2R	13167210	13167710	mbl	-
CHR2R	13172830	13173330	mbl	Mef2,
CHR2R	1318342	1318842	laccase2	-
CHR2R	13223464	13223964	CR43661	Trl,dl,z,
CHR2R	13226204	13226704	CR43661	CTCF,su(Hw),mod(mdg4),
CHR2R	13249401	13249901	tRNA:CR30232	-
CHR2R	13290865	13291365	CG6568	Trl,dl,cad,
CHR2R	13308039	13308539	l(2)k01209	HDAC1,GATAe,CTCF,HDAC11,Tbp,HDAC4a,twi,sens,usp,bin,Trl,dl,kn,gsb-n,prd,tll,zfh1,CG8478,jumu,Lpt,cad,bap,Mef2,Sin3A,Dll,z,br,kni,disco,HDAC6,dm,brm,HDAC3,Med,da,
CHR2R	13331889	13332389	EDTP	CTCF,HDAC1,HDAC11,Tbp,HDAC4a,su(Hw),bab1,Trl,dl,CG8478,Sin3A,HDAC6,
CHR2R	13345657	13346157	CG14478	HDAC1,gro,Tbp,tin,twi,Mef2,dl,bin,HDAC3,Trl,prd,slp1,Lpt,bap,N,z,ttk,HDAC4a,psq,hb,sna,Med,da,cad,
CHR2R	13348518	13349018	CG14478	HDAC1,tin,twi,dl,E(z),bin,prd,Lpt,cad,Mef2,HDAC11,HDAC4a,hb,HDAC3,sna,Med,da,
CHR2R	13373344	13373844	NT5E-2	Trl,
CHR2R	13401692	13402192	CG4853	HDAC1,HDAC4a,bin,Trl,dl,Su(var)3-9,slp1,Sin3A,HDAC6,cad,chinmo,HDAC3,CTCF,da,
CHR2R	13421407	13421907	Patronin	HDAC4a,dl,HDAC3,
CHR2R	13423119	13423619	Patronin	HDAC1,Ubx,Tbp,HDAC4a,twi,Mef2,yki,Trl,dl,CG8478,tll,Su(var)3-9,Sin3A,HDAC6,Stat92E,dm,HDAC3,Med,da,
CHR2R	13431349	13431849	CG34194	dl,Su(var)3-9,
CHR2R	13435098	13435598	MESR4	CTCF,HDAC1,Sin3A,gro,Ubx,HDAC11,Tbp,HDAC4a,bon,twi,yki,Trl,trem,dl,kn,cnc,prd,tll,jumu,Mef2,z,kni,HDAC6,Dll,dm,HDAC3,hb,Med,da,
CHR2R	1347779	1348279	CG30440	HP1b,
CHR2R	134831	135331	IntS3	HP1b,
CHR2R	13485873	13486373	CR43920	twi,sens,Mef2,
CHR2R	13527786	13528286	CG10936	CBP,
CHR2R	13569610	13570110	Sema-1b	HDAC1,twi,trem,dl,HDAC3,slp1,Sin3A,z,D,hth,sna,Med,da,
CHR2R	13604517	13605017	CG6424	HDAC1,mod(mdg4),gro,Tbp,tin,twi,Mef2,yki,Su(H),bin,Trl,dl,CG8478,cnc,gsb-n,prd,pan,Lpt,z,insv,Dll,HDAC4a,hkb,sna,Med,da,EcR,
CHR2R	13614132	13614632	CG4975	HDAC1,HDAC4a,twi,sens,dl,E(z),Sin3A,HDAC6,D,HDAC3,Med,
CHR2R	13629974	13630474	Ir54a	HDAC3,CBP,
CHR2R	13637887	13638387	CG5002	twi,sens,trem,dl,cad,Trl,prd,Su(var)3-9,jumu,sna,Med,da,
CHR2R	13668824	13669324	fab1	CTCF,HDAC1,Ubx,HDAC11,Tbp,HDAC4a,twi,sens,trem,dl,HDAC3,Sin3A,CBP,HDAC6,Med,
CHR2R	13689809	13690309	grh	tll,Tbp,twi,HDAC1,Trl,dl,CG8478,mod(mdg4),sc,Hr78,N,z,Abd-B,HDAC4a,lola,HDAC3,hb,E(z),sna,Med,da,
CHR2R	13706187	13706687	grh	twi,dl,da,
CHR2R	13709515	13710015	grh	Tbp,twi,dl,CG8478,pan,Lpt,Mef2,h,dm,Med,da,
CHR2R	13710657	13711157	grh	bcd,Tbp,twi,dl,slp1,Dll,sna,Med,da,
CHR2R	13719534	13720034	grh	dl,
CHR2R	13733907	13734407	olf186-M	gro,bon,Su(H),Trl,CBP,Dll,
CHR2R	13736387	13736887	olf186-F	su(Hw),dl,cnc,
CHR2R	13739845	13740345	olf186-F	twi,trem,dl,Med,da,
CHR2R	13743302	13743802	olf186-F	Trl,dl,
CHR2R	13756555	13757055	Mapmodulin	hth,HDAC1,Tbp,twi,Trl,psq,trem,dl,CG8478,prd,N,z,br,Mef2,D,hb,cnc,HDAC3,Med,
CHR2R	13819507	13820007	PpY-55A	sbb,
CHR2R	13886181	13886681	dpr13	-
CHR2R	13908873	13909373	CG10910	-
CHR2R	14029275	14029775	pAbp	HDAC1,mod(mdg4),gro,bcd,Tbp,bon,twi,sens,bab1,Trl,dl,Mef2,E(z),CG8478,HDAC3,gsb-n,sc,Hr78,jumu,N,Sin3A,z,CBP,br,disco,HDAC11,CG16778,HDAC4a,dm,hb,Med,da,
CHR2R	14044216	14044716	lolal	HDAC1,gro,bcd,Tbp,tin,twi,Mef2,yki,Su(H),sens,Trl,trem,dl,E(z),CG8478,slp1,jumu,Lpt,N,z,disco,HDAC11,HDAC4a,HDAC3,hb,Med,da,
CHR2R	14104566	14105066	CG30114	twi,
CHR2R	14114131	14114631	fj	-
CHR2R	14155935	14156435	Ote	gro,HDAC4a,HDAC11,Dll,chinmo,
CHR2R	141690	142190	IntS3	-
CHR2R	14180219	14180719	CG14502	hth,HDAC1,gro,Tbp,tin,twi,Mef2,yki,dl,bin,bap,HDAC11,Dll,D,da,
CHR2R	14195246	14195746	Tango8	Kr,HDAC1,gro,HDAC4a,twi,dl,cnc,prd,tll,pan,cad,eve,HDAC11,D,Stat92E,hb,Med,da,
CHR2R	14213118	14213618	Tango8	-
CHR2R	14217518	14218018	Tango8	gro,gsb-n,Su(var)3-9,HDAC11,HDAC4a,en,
CHR2R	14229739	14230239	sbb	gro,Trl,CG8478,eve,HDAC11,tin,da,EcR,
CHR2R	14232497	14232997	sbb	gro,bon,
CHR2R	14237570	14238070	sbb	gro,bin,Trl,cad,Su(H),Su(var)3-9,hth,
CHR2R	14239073	14239573	sbb	bon,Su(H),sens,Trl,dl,Su(var)3-9,CG8478,eve,hth,cnc,
CHR2R	14241640	14242140	sbb	bin,Trl,dl,prd,eve,EcR,
CHR2R	14243714	14244214	sbb	hth,HDAC1,GATAe,gro,Tbp,tin,twi,yki,Su(H),sens,Trl,dl,CG8478,Hr78,Lpt,cad,bap,N,Mef2,z,disco,pan,hkb,lola,Eip74EF,hb,cnc,Med,da,
CHR2R	14244800	14245300	sbb	hth,HDAC1,mod(mdg4),gro,HDAC11,Tbp,HDAC4a,tin,bon,twi,yki,Su(H),bin,Trl,dl,Mef2,E(z),CG8478,prd,tll,Hr78,Lpt,cad,eve,bap,N,z,Dfd,kni,HDAC6,Dll,Abd-B,Eip74EF,hb,Med,da,
CHR2R	14293251	14293751	GstE6	Su(H),cnc,Trl,CG8478,ttk,HDAC6,
CHR2R	14300991	14301491	Dp1	HDAC1,gro,Tbp,twi,yki,Su(H),Trl,dl,Mef2,E(z),CG8478,Hr78,usp,Lpt,N,HDAC11,HDAC4a,hb,Med,da,
CHR2R	14319987	14320487	CG12263	Trl,CBP,HDAC3,
CHR2R	14320943	14321443	CG30118	Trl,cnc,HDAC11,
CHR2R	14322714	14323214	CG30118	twi,dl,Trl,
CHR2R	14330309	14330809	slim	mod(mdg4),twi,Mef2,HDAC1,Trl,dl,bin,Su(var)3-9,
CHR2R	14416360	14416860	CG10924	HDAC1,mod(mdg4),CTCF,gro,bon,twi,su(Hw),Trl,dl,cad,Hr78,CG8478,HDAC4a,N,kni,D,Abd-B,psq,hkb,lola,dm,EcR,
CHR2R	14419245	14419745	CG10924	hth,twi,HDAC1,dl,Su(var)3-9,Lpt,HDAC4a,Med,da,
CHR2R	14423586	14424086	Pepck	Tbp,twi,HDAC1,Trl,dl,Med,da,cad,
CHR2R	14434488	14434988	Rgk2	cnc,
CHR2R	14460243	14460743	Rgk2	gro,twi,dl,bin,Med,da,
CHR2R	14473375	14473875	GEFmeso	tin,sens,twi,CTCF,
CHR2R	14496603	14497103	GEFmeso	CTCF,hth,tin,twi,Mef2,da,
CHR2R	14498544	14499044	GEFmeso	twi,Su(H),sens,Trl,dl,jumu,z,D,hkb,tin,cnc,Med,
CHR2R	14539367	14539867	SP2637	Trl,gsb-n,z,CBP,
CHR2R	14540253	14540753	SP2637	gro,Tbp,bon,yki,Su(H),HDAC1,Trl,dl,CG8478,gsb-n,Su(var)3-9,z,insv,Dll,twi,
CHR2R	14553496	14553996	CG33136	twi,dl,bin,Mef2,da,
CHR2R	14556107	14556607	CG33136	HDAC11,HDAC4a,cnc,
CHR2R	14559423	14559923	edl	hth,gro,HDAC4a,twi,HDAC1,dl,CG8478,CBP,disco,HDAC11,h,Med,da,
CHR2R	14575680	14576180	Sik3	CTCF,HDAC1,Tbp,twi,su(Hw),Trl,dl,E(z),CG8478,mod(mdg4),zfh1,Lpt,cad,N,Sin3A,z,disco,HDAC11,D,psq,lola,dm,Eip74EF,sna,Med,da,
CHR2R	14581409	14581909	CG15071	twi,dl,da,
CHR2R	14582853	14583353	CG15071	dl,CG8478,HDAC11,
CHR2R	14585821	14586321	CG15071	Trl,CG8478,
CHR2R	14645427	14645927	CG42351	sens,CBP,
CHR2R	14662753	14663253	CR43964	bab1,CG8478,ttk,dm,
CHR2R	14687700	14688200	l(2)08717	gro,bcd,HDAC11,Tbp,twi,yki,Su(H),HDAC1,Trl,dl,Mef2,CG8478,cad,HDAC4a,hth,sna,Med,da,
CHR2R	14690005	14690505	l(2)08717	hth,tll,gro,Tbp,HDAC4a,tin,twi,Mef2,yki,Stat92E,sens,HDAC1,bin,Trl,dl,CG8478,prd,Su(var)3-9,slp1,Hr78,Lpt,N,ftz,h,HDAC11,Dll,hb,CTCF,E(z),cnc,sna,Med,shn,da,EcR,
CHR2R	14690717	14691217	l(2)08717	gro,HDAC4a,twi,Stat92E,usp,HDAC1,Trl,dl,prd,slp1,ftz,CTCF,cnc,sna,Med,shn,da,
CHR2R	14692902	14693402	l(2)08717	gro,Su(H),cnc,usp,Trl,dl,CG8478,
CHR2R	14693499	14693999	l(2)08717	gro,Su(H),cnc,Trl,dl,CG8478,cad,N,insv,Dll,Abd-B,h,EcR,
CHR2R	14694606	14695106	l(2)08717	CTCF,mod(mdg4),su(Hw),bab1,dl,dm,Kr,cnc,
CHR2R	1469819	1470319	Fis1	HP1b,
CHR2R	14721034	14721534	CG15098	CBP,
CHR2R	14731246	14731746	CG15099	HDAC3,CBP,
CHR2R	14732905	14733405	CG15099	HDAC1,Trl,dl,HDAC3,hkb,Med,
CHR2R	14742447	14742947	Jheh1	pan,cnc,sens,Su(var)3-9,HDAC11,HDAC4a,
CHR2R	14748344	14748844	Jheh3	cnc,
CHR2R	148342	148842	IntS3	HP1b,
CHR2R	14836397	14836897	sano	mod(mdg4),twi,
CHR2R	1485866	1486366	Fis1	HP1b,
CHR2R	14862969	14863469	CG18605	HDAC3,CBP,
CHR2R	1487326	1487826	Fis1	HP1b,
CHR2R	1493628	1494128	Fis1	HDAC4a,sens,HP1b,hkb,
CHR2R	149511	150011	IntS3	Trl,
CHR2R	14985861	14986361	Ir56a	-
CHR2R	15025863	15026363	CG15111	HDAC3,
CHR2R	15031969	15032469	CR43399	HDAC1,CTCF,twi,sens,bin,Trl,dl,eve,HDAC11,Med,da,
CHR2R	15034786	15035286	CR43399	CTCF,dl,E(z),
CHR2R	15052510	15053010	CG10737	Trl,dl,eve,ttk,
CHR2R	15066401	15066901	hppy	HDAC1,CTCF,gro,Tbp,twi,Su(H),Trl,dl,E(z),CG8478,mod(mdg4),Ubx,Sin3A,HDAC6,HDAC11,HDAC4a,psq,Med,
CHR2R	15068516	15069016	hppy	-
CHR2R	15079202	15079702	hppy	gro,Su(H),Trl,CBP,
CHR2R	15117101	15117601	cora	HDAC1,gro,bon,yki,Su(H),Trl,dl,E(z),CG8478,mod(mdg4),Hr78,N,z,Dll,psq,
CHR2R	15121024	15121524	cora	Trl,
CHR2R	15141678	15142178	CG33453	mod(mdg4),CTCF,Tbp,HDAC4a,bon,Mef2,HDAC1,bin,su(Hw),dl,kn,CG8478,cad,Trl,Su(var)3-9,zfh1,Lpt,N,CBP,eve,Dll,Abd-B,twi,HDAC6,hth,dm,HDAC3,Eip74EF,Hr78,usp,
CHR2R	1515949	1516449	CG17508	HP1b,
CHR2R	1516494	1516994	CG17508	HP1b,
CHR2R	15190757	15191257	CG7461	HDAC3,chinmo,
CHR2R	15206822	15207322	Rgk1	-
CHR2R	15245243	15245743	CG11961	HDAC1,CTCF,HDAC11,HDAC4a,twi,su(Hw),Trl,dl,Mef2,Su(var)3-9,mod(mdg4),cad,Sin3A,HDAC6,Med,
CHR2R	15258020	15258520	CG9416	twi,kn,
CHR2R	15300964	15301464	snoRNA:hts-a	twi,dl,Mef2,bin,bap,disco,eve,hth,tin,
CHR2R	15329546	15330046	RpL11	CTCF,HDAC1,Tbp,dl,HDAC3,Sin3A,HDAC11,D,HDAC4a,dm,Med,
CHR2R	15337114	15337614	betaTub56D	hth,HDAC1,gro,Tbp,tin,twi,Mef2,Trl,dl,bin,Su(var)3-9,mod(mdg4),Hr78,Lpt,ttk,Med,da,
CHR2R	15350079	15350579	par-1	CTCF,Trl,dl,CG8478,mod(mdg4),Hr78,N,D,cnc,
CHR2R	15355677	15356177	par-1	hth,CTCF,gro,twi,Mef2,yki,Su(H),sens,HDAC1,bin,Trl,dl,CG8478,Su(var)3-9,mod(mdg4),zfh1,Hr78,Lpt,D,N,Dll,lola,Eip74EF,da,
CHR2R	15388650	15389150	CG16926	hkb,
CHR2R	15452409	15452909	tRNA:CR33535	-
CHR2R	15507486	15507986	sm	GATAe,usp,Trl,dl,disco,eve,EcR,
CHR2R	15518545	15519045	sm	HDAC1,CTCF,gro,Tbp,twi,yki,Su(H),Trl,dl,kn,bin,CG8478,Mef2,eve,hb,Med,shn,da,
CHR2R	156010	156510	IntS3	HP1b,
CHR2R	15711396	15711896	Toll-7	-
CHR2R	15731601	15732101	Toll-7	Kr,HDAC4a,gro,Dll,sbb,
CHR2R	15744496	15744996	Obp56i	tll,HDAC4a,twi,gro,dl,prd,eve,HDAC11,sna,Med,da,
CHR2R	15757978	15758478	Obp56i	hth,GATAe,tin,sens,dl,prd,slp1,jumu,D,disco,hkb,hb,Med,da,
CHR2R	15779158	15779658	CG13872	sna,
CHR2R	1579133	1579633	scaf	CTCF,su(Hw),Trl,pan,
CHR2R	15794182	15794682	CG13872	gro,Dll,
CHR2R	158083	158583	IntS3	Su(H),N,HP1b,Trl,
CHR2R	15851815	15852315	CG10822	dl,
CHR2R	1586202	1586702	CG17337	CTCF,sens,HDAC1,su(Hw),dl,HDAC3,disco,ttk,hb,Med,HP1b,
CHR2R	15935529	15936029	CG16898	twi,da,
CHR2R	15959006	15959506	18w	tll,bcd,twi,dl,prd,cad,kni,h,hb,sna,Med,shn,da,
CHR2R	15971563	15972063	18w	-
CHR2R	15993838	15994338	18w	CTCF,gro,bcd,Tbp,tin,bon,twi,Mef2,yki,Su(H),HDAC1,Trl,dl,kn,CG8478,prd,Su(var)3-9,sc,zfh1,Hr78,lola,Stat92E,Lpt,N,Dfd,kni,Dll,Abd-B,HDAC4a,Eip74EF,hb,sna,Med,da,EcR,
CHR2R	16013661	16014161	18w	twi,bin,gro,dl,gsb-n,cad,HDAC11,HDAC4a,Med,da,
CHR2R	16027133	16027633	CG11041	gro,
CHR2R	16048805	16049305	CG11041	twi,su(Hw),
CHR2R	16071810	16072310	CG16894	-
CHR2R	16078780	16079280	CG16894	sens,
CHR2R	16101004	16101504	CG16894	gro,su(Hw),
CHR2R	16144114	16144614	Ate1	Tbp,HDAC1,dl,HDAC3,N,HDAC6,
CHR2R	16150126	16150626	mus209	Ubx,Tbp,HDAC4a,twi,HDAC1,trem,dl,HDAC3,jumu,Sin3A,HDAC6,HDAC11,Med,da,
CHR2R	16187626	16188126	CG11200	-
CHR2R	16199599	16200099	CG13868	HDAC4a,twi,dl,prd,hb,sna,Med,da,
CHR2R	16201005	16201505	CG13868	Mef2,Trl,dl,prd,eve,hb,
CHR2R	16209668	16210168	CG8920	chinmo,hkb,
CHR2R	16216470	16216970	CG8929	bcd,twi,dl,HDAC3,h,chinmo,sna,Med,
CHR2R	1623331	1623831	ap	twi,sens,gro,dl,cnc,prd,en,da,
CHR2R	16246019	16246519	CG11192	-
CHR2R	16279288	16279788	CG12484	-
CHR2R	16325370	16325870	CG12484	Dfd,
CHR2R	16358949	16359449	Obp57c	h,
CHR2R	16364071	16364571	Obp57c	sbb,
CHR2R	16461092	16461592	qsm	chinmo,
CHR2R	16491162	16491662	bl	CTCF,bcd,tin,twi,sens,HDAC1,su(Hw),bab1,dl,prd,mod(mdg4),HDAC4a,kni,bap,N,Mef2,disco,h,D,HDAC6,HDAC3,sna,Med,da,
CHR2R	16505142	16505642	Hil	Tbp,bon,HDAC1,Trl,dl,CG8478,N,Sin3A,z,lola,
CHR2R	16510729	16511229	CG16742	HDAC1,Sin3A,Tbp,HDAC4a,twi,Trl,dl,HDAC3,z,HDAC6,HDAC11,dm,CTCF,sna,Med,da,
CHR2R	16513636	16514136	CG16742	HDAC3,
CHR2R	16520237	16520737	Rcd6	HDAC1,hkb,
CHR2R	16558445	16558945	CG30152	CTCF,HDAC1,Ubx,HDAC4a,twi,Trl,dl,HDAC3,mod(mdg4),Lpt,Sin3A,z,HDAC6,HDAC11,Med,
CHR2R	16609260	16609760	CG13442	su(Hw),
CHR2R	16626810	16627310	CG13442	su(Hw),
CHR2R	16670118	16670618	CG43711	sens,
CHR2R	16675167	16675667	CG43666	-
CHR2R	1669696	1670196	CG11163	HDAC1,gro,HDAC4a,twi,yki,Su(H),Trl,dl,Mef2,prd,CG8478,Lpt,z,HDAC6,HDAC11,EcR,D,tin,Med,da,
CHR2R	16715562	16716062	sktl	HDAC3,h,cad,chinmo,
CHR2R	16719253	16719753	sktl	CTCF,HDAC1,mod(mdg4),gro,Tbp,twi,bab1,Trl,dl,CG8478,Lpt,bap,Sin3A,z,HDAC4a,dm,cnc,Med,da,
CHR2R	16722584	16723084	insc	tll,GATAe,twi,HDAC1,Trl,dl,slp1,Med,da,
CHR2R	16726925	16727425	insc	hth,twi,Mef2,Trl,su(Hw),dl,da,
CHR2R	16757581	16758081	IM14	HDAC1,Ubx,twi,bab1,dl,Sin3A,HDAC6,HDAC4a,
CHR2R	16790570	16791070	otp	twi,sens,HDAC1,dl,CG8478,Trl,tll,Pcl,h,Dll,Stat92E,HDAC4a,prd,CTCF,da,
CHR2R	16801342	16801842	Rx	hth,HDAC1,gro,yki,Trl,dl,CG8478,N,Dfd,Dll,HDAC4a,Eip74EF,Med,da,
CHR2R	16826267	16826767	Act57B	CTCF,HDAC4a,Mef2,bin,HDAC1,bab1,dl,kn,ttk,mod(mdg4),zfh1,bap,cad,twi,Hr39,hkb,dm,EcR,
CHR2R	16827320	16827820	Act57B	CTCF,Mef2,bin,dl,bap,eve,twi,brm,
CHR2R	16844527	16845027	hbn	dl,prd,
CHR2R	16884245	16884745	CG10543	HDAC1,GATAe,CTCF,gro,Tbp,HDAC4a,tin,twi,Mef2,yki,Su(H),usp,bin,Trl,psq,dl,CG8478,tll,Su(var)3-9,mod(mdg4),zfh1,slp1,Hr78,jumu,Lpt,cad,N,Sin3A,z,Dfd,disco,eve,HDAC11,Abd-B,hth,hkb,lola,HDAC3,Eip74EF,hb,Med,da,
CHR2R	16898876	16899376	grau	Tbp,HDAC1,dl,E(z),HDAC3,Su(var)3-9,Sin3A,z,HDAC6,HDAC11,ttk,CTCF,
CHR2R	16908731	16909231	RIC-3	-
CHR2R	16932314	16932814	shg	hth,dl,
CHR2R	16935737	16936237	shg	tll,mod(mdg4),gro,bcd,Tbp,twi,sens,HDAC1,dl,Trl,prd,Lpt,z,CBP,disco,D,HDAC4a,hb,sna,Med,shn,da,cad,
CHR2R	16945562	16946062	cpa	mod(mdg4),CTCF,Tbp,sens,HDAC1,dl,HDAC3,Su(var)3-9,ttk,hb,Med,
CHR2R	1694809	1695309	dpr12	hkb,hb,
CHR2R	16963395	16963895	Treh	HDAC1,gro,HDAC4a,yki,Su(H),su(Hw),Trl,dl,CG8478,Hr78,N,eve,HDAC11,Dll,
CHR2R	17015803	17016303	mago	HDAC1,Tbp,HDAC4a,twi,yki,sens,su(Hw),dl,E(z),HDAC3,Trl,Su(var)3-9,Sin3A,HDAC6,HDAC11,Dll,hkb,dm,Med,da,
CHR2R	17022035	17022535	mago	twi,bin,dl,da,
CHR2R	17033090	17033590	CG9418	HDAC4a,HDAC1,HDAC3,HDAC6,cnc,
CHR2R	17044658	17045158	CG30389	twi,dl,ttk,HDAC3,da,
CHR2R	17046742	17047242	CG30389	HDAC1,Tbp,twi,Mef2,sens,Trl,dl,CG8478,mod(mdg4),zfh1,Hr78,jumu,N,CBP,ttk,hkb,Med,da,
CHR2R	1706106	1706606	dpr12	chinmo,su(Hw),
CHR2R	17076502	17077002	Lapsyn	sens,HDAC3,CBP,
CHR2R	17082189	17082689	Lapsyn	twi,dl,Trl,cad,
CHR2R	17088480	17088980	Glycogenin	twi,Mef2,Su(H),HDAC1,su(Hw),Trl,dl,CG8478,psq,da,
CHR2R	17089158	17089658	Glycogenin	twi,Mef2,Su(H),HDAC1,Trl,dl,CTCF,da,
CHR2R	17136347	17136847	ASPP	CTCF,gro,HDAC4a,twi,HDAC1,dl,CG8478,tll,Su(var)3-9,Lpt,HDAC11,EcR,Trl,hb,sna,Med,da,
CHR2R	17162183	17162683	CG34203	-
CHR2R	17170014	17170514	MFS16	HDAC1,GATAe,CTCF,Tbp,HDAC4a,twi,sens,Trl,dl,HDAC3,prd,jumu,pan,Sin3A,disco,HDAC6,HDAC11,sna,Med,da,
CHR2R	17210579	17211079	CG30394	CTCF,HDAC1,Tbp,HDAC4a,twi,Trl,Mad,dl,Mef2,E(z),CG8478,HDAC3,cnc,Su(var)3-9,mod(mdg4),jumu,Sin3A,z,br,disco,HDAC6,HDAC11,D,hkb,dm,sens,Med,da,
CHR2R	17226271	17226771	CG15666	twi,dl,HDAC3,chinmo,da,
CHR2R	17259331	17259831	cv-2	twi,Dfd,dl,slp1,HDAC4a,hb,da,
CHR2R	17262294	17262794	cv-2	-
CHR2R	17270218	17270718	CG10795	CTCF,Tbp,HDAC1,bab1,dl,HDAC3,gsb-n,mod(mdg4),CG16778,cad,HP1b,dm,
CHR2R	17334166	17334666	Sdc	su(Hw),Trl,
CHR2R	17358663	17359163	Sdc	-
CHR2R	17384395	17384895	Fkbp13	HDAC1,GATAe,gro,Tbp,HDAC4a,Mef2,yki,Su(H),Trl,dl,Su(var)3-9,disco,eve,HDAC11,hkb,usp,EcR,
CHR2R	17389323	17389823	MESK2	CTCF,HDAC1,Sin3A,GATAe,Ubx,Tbp,twi,pan,yki,Trl,trem,dl,kn,dm,CG8478,cnc,tll,Su(var)3-9,zfh1,Lpt,N,z,CBP,Dfd,kni,disco,HDAC6,eve,HDAC11,D,HDAC4a,Hr39,hkb,HDAC3,Med,da,
CHR2R	17393417	17393917	MESK2	CG8478,
CHR2R	17394433	17394933	MESK2	CTCF,E(z),CG8478,CBP,
CHR2R	17410170	17410670	Egfr	HDAC1,GATAe,CTCF,Tbp,twi,sens,bab1,Trl,trem,dl,mod(mdg4),disco,D,HDAC3,sna,Med,da,
CHR2R	17414807	17415307	Egfr	HDAC4a,tin,twi,dl,HDAC11,
CHR2R	17456944	17457444	CG10440	HDAC4a,pan,su(Hw),
CHR2R	17459359	17459859	CG10440	twi,HDAC1,Trl,su(Hw),dl,Pcl,
CHR2R	17461137	17461637	CG10440	-
CHR2R	17463443	17463943	CG10440	HDAC4a,twi,dl,Dll,HDAC11,da,
CHR2R	17473144	17473644	CG30222	twi,dl,Med,
CHR2R	17477545	17478045	CG33225	-
CHR2R	17492699	17493199	CG10433	Mef2,
CHR2R	17495681	17496181	CG43243	mod(mdg4),CTCF,bin,Trl,CG8478,kni,
CHR2R	17501925	17502425	CG15673	HDAC3,
CHR2R	17523425	17523925	CG10321	twi,sens,dl,HDAC3,chinmo,hkb,hb,sna,Med,
CHR2R	17525257	17525757	CG10321	HDAC3,
CHR2R	17529460	17529960	CG10082	twi,
CHR2R	17533962	17534462	CG10082	HDAC1,CTCF,gro,Tbp,HDAC4a,tin,twi,Mef2,yki,Su(H),Stat92E,sens,Trl,dl,CG8478,gsb-n,prd,tll,zfh1,Lpt,z,disco,HDAC6,HDAC11,psq,HDAC3,hb,cnc,sna,Med,da,
CHR2R	17543894	17544394	CR43786	HDAC3,chinmo,
CHR2R	17549706	17550206	pirk	Trl,pan,
CHR2R	17574884	17575384	Tbp	HDAC1,Tbp,HDAC4a,Trl,dl,HDAC3,Su(var)3-9,Sin3A,ttk,HDAC6,Med,
CHR2R	17588617	17589117	HmgZ	CTCF,HDAC4a,Snr1,sens,HDAC1,Trl,dl,HDAC6,HDAC11,ttk,cnc,
CHR2R	17590439	17590939	HmgZ	CTCF,gro,bcd,HDAC11,Tbp,twi,usp,HDAC1,Trl,Dfd,dl,fru,E(z),prd,Lpt,eve,N,Mef2,z,insv,kni,disco,h,HDAC6,HDAC4a,en,hb,cnc,CG8478,Med,da,
CHR2R	17601083	17601583	HmgD	HDAC1,gro,bcd,Tbp,twi,yki,Su(H),Trl,psq,dl,kn,Su(var)3-9,CG8478,HDAC3,Mef2,Sin3A,z,br,HDAC6,Dll,HDAC4a,hb,Med,da,
CHR2R	17652096	17652596	CR43984	su(Hw),dl,
CHR2R	17673258	17673758	lox2	-
CHR2R	17681597	17682097	CG34204	-
CHR2R	17755930	17756430	comr	hth,Mef2,
CHR2R	17771456	17771956	Fili	hth,Kr,HDAC1,HDAC4a,tin,twi,bin,Trl,gro,dl,tll,Su(var)3-9,slp1,CG8478,pan,Lpt,eve,bap,Mef2,HDAC11,E(z),da,
CHR2R	17776211	17776711	Fili	CTCF,hth,
CHR2R	17939776	17940276	CG13500	-
CHR2R	17965875	17966375	synj	CTCF,cnc,HDAC3,
CHR2R	17967094	17967594	synj	HDAC1,HDAC4a,twi,Trl,dl,mod(mdg4),Sin3A,da,
CHR2R	17967664	17968164	synj	HDAC1,mod(mdg4),twi,Trl,dl,CG8478,N,Sin3A,da,
CHR2R	18004338	18004838	Vrp1	Trl,
CHR2R	18015651	18016151	NtR	Trl,CTCF,
CHR2R	18053495	18053995	CG34206	sens,
CHR2R	18081819	18082319	Swim	CTCF,
CHR2R	18086381	18086881	snoRNA:Or-CD1	-
CHR2R	18114667	18115167	Oatp58Dc	twi,cnc,da,
CHR2R	18132178	18132678	dve	GATAe,CTCF,HDAC11,twi,sens,HDAC1,dl,prd,chinmo,Med,da,
CHR2R	18157137	18157637	dve	HDAC11,twi,Trl,Dfd,dl,CG8478,N,z,Pcl,h,chinmo,Hr39,su(Hw),HDAC3,Med,da,
CHR2R	18158175	18158675	CR43422	mod(mdg4),gro,HDAC11,Tbp,bon,twi,Mef2,yki,Su(H),sens,HDAC1,Trl,dl,CG8478,sc,zfh1,slp1,Hr78,Stat92E,Lpt,N,z,insv,Dfd,disco,Dll,Abd-B,HDAC4a,lola,Eip74EF,Med,da,
CHR2R	18174253	18174753	CR43422	mod(mdg4),CTCF,sens,su(Hw),N,dm,
CHR2R	18198601	18199101	wdp	gro,Trl,
CHR2R	18200938	18201438	wdp	-
CHR2R	18210343	18210843	Gp150	tll,bcd,twi,sens,dl,prd,Mef2,tin,hb,Med,da,
CHR2R	18212187	18212687	Gp150	twi,sens,dl,prd,D,
CHR2R	18273380	18273880	CG13506	-
CHR2R	18283493	18283993	babos	HDAC4a,HDAC1,Mef2,eve,HDAC11,sbb,
CHR2R	18322089	18322589	ppk12	-
CHR2R	18426002	18426502	px	cad,
CHR2R	18427043	18427543	px	gro,cad,HDAC3,cnc,
CHR2R	18429556	18430056	px	bon,HDAC1,gro,cad,hth,cnc,
CHR2R	18433688	18434188	px	gro,bin,Trl,su(Hw),dl,N,Pcl,CG8478,
CHR2R	18437262	18437762	CG6018	Trl,
CHR2R	18441322	18441822	CG6018	CTCF,gro,Hr78,
CHR2R	18444489	18444989	px	gro,
CHR2R	18457778	18458278	CG11362	gro,yki,Su(H),Trl,dl,Dll,
CHR2R	18474950	18475450	dnr1	Trl,eve,
CHR2R	18476973	18477473	dnr1	twi,Trl,Mef2,cad,eve,EcR,cnc,
CHR2R	18485667	18486167	CG4269	GATAe,CBP,
CHR2R	18493107	18493607	CG4294	CTCF,Ubx,Tbp,twi,HDAC1,Trl,dl,cad,Sin3A,CBP,HDAC6,HDAC11,dm,HDAC3,hb,Med,da,
CHR2R	18528427	18528927	RpS24	HDAC1,Tbp,sens,dl,HDAC3,Sin3A,HDAC6,Mef2,HDAC4a,dm,Med,
CHR2R	18546429	18546929	CG13511	CTCF,
CHR2R	18553924	18554424	CG42868	cnc,
CHR2R	18565686	18566186	RYBP	gro,HDAC11,Tbp,HDAC4a,bon,Mef2,yki,Su(H),HDAC1,su(Hw),Trl,dl,CG8478,HDAC3,gsb-n,Su(var)3-9,mod(mdg4),Hr78,Lpt,D,N,insv,Pcl,kni,Dll,Stat92E,Abd-B,h,Med,EcR,
CHR2R	18568263	18568763	ppa	gro,twi,Trl,dl,Lpt,z,Mef2,psq,sna,Med,da,
CHR2R	18573556	18574056	ppa	gro,HDAC11,Tbp,twi,Mef2,yki,Su(H),HDAC1,Trl,dl,E(z),bin,CG8478,gsb-n,Su(var)3-9,Hr78,Lpt,N,h,HDAC6,CG16778,Dll,Stat92E,HDAC4a,psq,dm,tin,prd,cnc,Med,da,
CHR2R	18576741	18577241	ppa	tll,mod(mdg4),lola,bcd,Tbp,Snr1,tin,twi,yki,Su(H),Stat92E,Trl,dl,fru,CG8478,prd,zfh1,pan,Lpt,bap,Mef2,z,h,eve,CG16778,dm,hb,sna,Med,shn,da,
CHR2R	18630970	18631470	jbug	dl,su(Hw),Trl,
CHR2R	18640975	18641475	CG13526	chinmo,
CHR2R	18653087	18653587	CG13527	-
CHR2R	18684671	18685171	CG42260	twi,su(Hw),Trl,dl,mod(mdg4),da,
CHR2R	1869281	1869781	Src42A	GATAe,lola,Tbp,HDAC1,Trl,dl,N,z,disco,HDAC11,ttk,HP1b,Med,
CHR2R	18741709	18742209	RpL23	CTCF,HDAC1,HDAC11,Tbp,twi,bab1,trem,dl,HDAC3,Trl,Su(var)3-9,mod(mdg4),Hr78,N,Sin3A,CBP,HDAC6,HDAC4a,HP1b,lola,dm,
CHR2R	18805884	18806384	CG30187	HDAC3,
CHR2R	1881270	1881770	Src42A	sens,Trl,
CHR2R	18817335	18817835	CG42678	HDAC3,
CHR2R	18821464	18821964	CG3788	gro,Tbp,twi,yki,Su(H),HDAC1,Trl,dl,CG8478,Su(var)3-9,sc,Hr78,Lpt,N,z,h,HDAC11,Mef2,Dll,pan,Med,da,EcR,
CHR2R	18922387	18922887	CG42741	HDAC4a,
CHR2R	18935886	18936386	twi	twi,dl,HDAC4a,
CHR2R	18950313	18950813	l(2)06496	HDAC4a,sens,HDAC1,dl,HDAC3,mod(mdg4),HDAC6,HDAC11,ttk,chinmo,
CHR2R	18951659	18952159	CG9890	Tbp,HDAC4a,HDAC1,HDAC3,Su(var)3-9,HDAC6,HDAC11,CTCF,
CHR2R	18974692	18975192	CG13538	-
CHR2R	1900971	1901471	Act42A	sens,HDAC3,
CHR2R	19101562	19102062	LS2	-
CHR2R	1910435	1910935	dream	Su(H),Trl,ttk,
CHR2R	19216477	19216977	CG30413	dl,
CHR2R	19221555	19222055	CG30413	su(Hw),
CHR2R	1922898	1923398	SCAP	Tbp,HDAC4a,twi,cnc,HDAC1,Dfd,dl,slp1,Hr78,N,Sin3A,h,HDAC6,HDAC11,ttk,Abd-B,Hr39,sna,Med,da,
CHR2R	19253467	19253967	vir	CTCF,Ubx,Tbp,Snr1,twi,HDAC1,Trl,trem,dl,HDAC3,tll,Hr78,N,Sin3A,z,Dfd,HDAC6,HDAC11,Abd-B,chinmo,HDAC4a,HP1b,lola,sna,Med,
CHR2R	19270863	19271363	CG13551	HDAC1,CTCF,HDAC11,HDAC4a,Snr1,bin,trem,dl,E(z),Hr78,N,Sin3A,Dfd,HDAC6,Abd-B,HP1b,lola,Eip74EF,
CHR2R	19299094	19299594	CG30411	su(Hw),
CHR2R	19315145	19315645	CG9815	CBP,
CHR2R	19317796	19318296	CG9815	-
CHR2R	19330627	19331127	CG43795	dl,Trl,CBP,chinmo,su(Hw),
CHR2R	19400475	19400975	CG3906	-
CHR2R	1940285	1940785	CCHa2r	CTCF,CBP,eve,sbb,
CHR2R	1944330	1944830	CG7856	bin,chinmo,
CHR2R	19445231	19445731	alphaPS5	chinmo,
CHR2R	19454456	19454956	apt	su(Hw),chinmo,
CHR2R	19458548	19459048	apt	Kr,HDAC1,dl,tin,da,
CHR2R	19469625	19470125	apt	sens,dl,CBP,
CHR2R	19475000	19475500	apt	twi,dl,Med,da,
CHR2R	19475538	19476038	apt	dl,
CHR2R	19477408	19477908	apt	-
CHR2R	19481855	19482355	apt	GATAe,tin,sens,bin,CBP,hkb,
CHR2R	19482945	19483445	apt	-
CHR2R	19500650	19501150	CG4019	cnc,
CHR2R	19504263	19504763	CG4019	CTCF,sens,su(Hw),mod(mdg4),CBP,pan,
CHR2R	19515302	19515802	retn	-
CHR2R	19545869	19546369	Pde8	twi,HDAC1,Trl,su(Hw),dl,Med,
CHR2R	19546753	19547253	Pde8	mod(mdg4),gro,bon,twi,yki,Su(H),Trl,dl,Su(var)3-9,Dll,dm,Med,
CHR2R	19554184	19554684	Pde8	gro,Tbp,bon,pan,yki,Su(H),Trl,dl,E(z),CG8478,gsb-n,Su(var)3-9,insv,CBP,HDAC11,Dll,HDAC4a,
CHR2R	19559849	19560349	CG42241	su(Hw),dl,cad,Trl,cnc,CG8478,
CHR2R	19564241	19564741	Pde8	Trl,CBP,
CHR2R	19588833	19589333	CG4091	sens,HDAC1,dl,ttk,HDAC3,Med,da,EcR,
CHR2R	19589629	19590129	CG4091	HDAC1,CTCF,Tbp,twi,sens,Trl,dl,prd,jumu,Sin3A,HDAC6,HDAC4a,HDAC3,Med,da,
CHR2R	19600164	19600664	Sesn	HDAC1,HDAC4a,bon,Mef2,sens,usp,Trl,dl,E(z),gsb-n,HDAC11,dm,CTCF,cnc,
CHR2R	19601351	19601851	Sesn	gro,HDAC4a,Mef2,yki,Su(H),Trl,dl,CG8478,Su(var)3-9,usp,eve,HDAC11,Dll,h,cnc,
CHR2R	19651526	19652026	CG5532	-
CHR2R	19670288	19670788	CG15800	chinmo,
CHR2R	19677146	19677646	CG15800	-
CHR2R	19685316	19685816	CG9850	Trl,z,
CHR2R	19689342	19689842	CG30177	sens,
CHR2R	19696063	19696563	Ssrp	HDAC1,CTCF,Ubx,Tbp,HDAC4a,dl,HDAC3,slp1,Sin3A,HDAC6,chinmo,dm,Med,
CHR2R	19704316	19704816	CG4797	cnc,
CHR2R	19720919	19721419	snoRNA:Psi18S-176	chinmo,HDAC11,
CHR2R	19737506	19738006	eIF6	HDAC1,Tbp,twi,usp,trem,Dfd,dl,fru,E(z),HDAC3,Su(var)3-9,slp1,Sin3A,z,HDAC11,Med,
CHR2R	19751963	19752463	CG4585	Tbp,bon,HDAC1,dl,CG8478,HDAC3,Ubx,N,Sin3A,CBP,ttk,chinmo,Med,
CHR2R	19752651	19753151	CG4585	Sin3A,GATAe,HDAC11,Tbp,HDAC4a,HDAC1,dl,CG8478,mod(mdg4),Ubx,jumu,N,CBP,HDAC6,D,HDAC3,Med,
CHR2R	19759132	19759632	ken	gro,Su(H),cnc,bin,Trl,dl,CG8478,ttk,Dll,
CHR2R	19760189	19760689	ken	gro,cnc,bin,Trl,dl,CG8478,N,chinmo,
CHR2R	1982125	1982625	Ars2	-
CHR2R	19865791	19866291	Sox14	tll,HDAC1,GATAe,gro,Ubx,lola,HDAC11,HDAC4a,twi,Mef2,yki,Su(H),sens,usp,bin,Trl,dl,fru,E(z),su(Hw),CG8478,cnc,gsb-n,Su(var)3-9,en,sc,zfh1,Hr78,jumu,Lpt,eve,bap,N,Sin3A,Dfd,disco,HDAC6,EcR,Dll,D,h,hkb,Eip74EF,Med,da,
CHR2R	19868693	19869193	Sox14	sens,HDAC1,dl,da,EcR,
CHR2R	19933642	19934142	tsr	HDAC1,Tbp,twi,Mef2,dl,bin,zfh1,cad,Sin3A,CBP,HDAC6,HDAC11,hb,cnc,Med,da,
CHR2R	19945690	19946190	eIF-5A	HDAC1,Tbp,twi,trem,dl,Mef2,CG8478,prd,Ubx,Hr78,N,Sin3A,cnc,CBP,ttk,dm,HDAC3,Med,
CHR2R	19953008	19953508	Rap2l	HDAC3,
CHR2R	19970932	19971432	CG16786	-
CHR2R	20017976	20018476	tamo	Trl,cnc,
CHR2R	20018480	20018980	tamo	Trl,cnc,
CHR2R	20032885	20033385	Dat	gro,bin,Trl,
CHR2R	20055238	20055738	CG3328	CBP,chinmo,
CHR2R	2006786	2007286	EcR	twi,Trl,dl,Su(var)3-9,da,
CHR2R	2007802	2008302	EcR	gro,Tbp,twi,yki,Su(H),sens,HDAC1,bin,Trl,dl,CG8478,prd,Su(var)3-9,Hr78,usp,Lpt,N,disco,EcR,Dll,HDAC4a,hb,sna,Med,da,
CHR2R	20135107	20135607	snoRNA:Me18S-A1597	-
CHR2R	20148102	20148602	CG3376	twi,hkb,da,
CHR2R	20161014	20161514	nvy	cad,chinmo,da,
CHR2R	20163549	20164049	nvy	Tbp,twi,HDAC1,Mad,dl,prd,h,cad,tin,sna,Med,da,
CHR2R	20167901	20168401	nvy	gro,twi,dl,cad,chinmo,Hr39,da,
CHR2R	2019343	2019843	EcR	mod(mdg4),gro,Ubx,Tbp,HDAC4a,tin,bon,twi,Mef2,yki,Su(H),HDAC1,Trl,dl,bin,CG8478,Su(var)3-9,zfh1,Hr78,Lpt,cad,bap,N,z,Dfd,HDAC11,Dll,Abd-B,psq,lola,dm,Eip74EF,hb,Med,da,EcR,
CHR2R	20194665	20195165	betaTub60D	Trl,
CHR2R	20197691	20198191	betaTub60D	Mef2,bin,twi,chinmo,tin,
CHR2R	2020302	2020802	EcR	hth,mod(mdg4),gro,Ubx,Tbp,tin,bon,twi,Mef2,yki,Su(H),HDAC1,Trl,dl,bin,zfh1,Hr78,Lpt,cad,bap,N,z,Dll,HDAC4a,psq,hb,CG8478,Med,da,EcR,
CHR2R	20209281	20209781	slbo	dl,HDAC4a,lola,
CHR2R	2021113	2021613	EcR	hth,HDAC1,mod(mdg4),GATAe,CTCF,Tbp,HDAC4a,tin,bon,twi,Mef2,yki,sens,Trl,psq,dl,bin,zfh1,Lpt,bap,N,z,disco,HDAC11,D,HDAC6,hkb,hb,CG8478,Med,da,EcR,
CHR2R	20211318	20211818	slbo	bin,
CHR2R	20215331	20215831	slbo	HDAC1,HDAC4a,bon,Mef2,Su(var)3-9,lola,Dfd,N,eve,HDAC11,hth,Stat92E,
CHR2R	20216863	20217363	slbo	HDAC4a,Trl,eve,HDAC11,
CHR2R	2021768	2022268	EcR	HDAC1,CTCF,Tbp,HDAC4a,tin,twi,sens,Trl,dl,mod(mdg4),zfh1,Lpt,Mef2,disco,HDAC11,HDAC6,hb,Med,da,
CHR2R	20250868	20251368	tRNA:N5:60C	HDAC4a,chinmo,HDAC11,
CHR2R	20256790	20257290	tRNA:N5:60C	gro,yki,Trl,dl,CG8478,Dll,HDAC4a,Med,da,
CHR2R	2026066	2026566	CG14589	twi,Trl,dl,da,EcR,
CHR2R	20262188	20262688	tRNA:N5:60C	chinmo,
CHR2R	20282924	20283424	Mov34	HDAC3,
CHR2R	20286985	20287485	Mov34	HDAC3,
CHR2R	2028914	2029414	tRNA:R2:42Ad	bon,Mef2,Trl,dl,CG8478,cad,hb,sna,da,
CHR2R	20289509	20290009	slik	HDAC1,CTCF,Tbp,twi,cnc,Trl,dl,CG8478,HDAC3,gsb-n,Su(var)3-9,mod(mdg4),jumu,N,Sin3A,z,HDAC11,HDAC4a,HDAC6,hkb,dm,hb,Med,da,
CHR2R	20298462	20298962	SerT	HDAC11,HDAC4a,HDAC1,dl,Med,sbb,
CHR2R	2032907	2033407	tRNA:K2:42Ae	gro,twi,Trl,dl,Hr78,CG8478,N,EcR,Abd-B,Med,da,
CHR2R	20402338	20402838	Letm1	HDAC1,CTCF,Tbp,HDAC4a,twi,dl,Lpt,N,HDAC6,HDAC11,Mef2,lola,hb,Med,da,
CHR2R	20426695	20427195	itp	gro,Trl,dl,gsb-n,HDAC11,hkb,CG8478,
CHR2R	20427918	20428418	itp	gro,Trl,su(Hw),
CHR2R	20436866	20437366	itp	su(Hw),
CHR2R	20441888	20442388	CG4622	su(Hw),
CHR2R	20468056	20468556	pio	hth,HDAC4a,twi,dl,Trl,prd,Su(var)3-9,mod(mdg4),slp1,sna,Med,da,cad,
CHR2R	20475048	20475548	pio	HDAC4a,HDAC11,
CHR2R	20487093	20487593	CG4692	CTCF,HDAC1,Sin3A,Tbp,Trl,dl,HDAC3,HDAC6,Mef2,HDAC11,dm,Med,
CHR2R	20551713	20552213	CG3683	HDAC1,Ubx,bcd,HDAC11,HDAC4a,twi,dl,HDAC3,mod(mdg4),Sin3A,HDAC6,hb,sna,Med,da,
CHR2R	20565165	20565665	Mmp1	su(Hw),
CHR2R	20571614	20572114	Mmp1	Trl,
CHR2R	20572631	20573131	Mmp1	gro,bon,Trl,Dll,Stat92E,h,CTCF,
CHR2R	20575624	20576124	Mmp1	E(z),Trl,chinmo,hkb,cnc,
CHR2R	20632667	20633167	CG30421	bin,Trl,dl,bap,CBP,
CHR2R	20655400	20655900	GstE12	CTCF,gro,yki,Su(H),HDAC1,Trl,dl,CG8478,HDAC3,cad,Hr78,N,Dll,Abd-B,lola,
CHR2R	20681122	20681622	CR43257	gro,bon,yki,Su(H),usp,Trl,dl,HDAC11,Dll,cnc,
CHR2R	20692531	20693031	CG42851	cnc,Dll,chinmo,
CHR2R	20734786	20735286	CG3650	Dll,chinmo,
CHR2R	20747926	20748426	Atf-2	-
CHR2R	20769070	20769570	CR43466	HDAC1,Tbp,Mef2,sens,Trl,dl,CG8478,prd,mod(mdg4),zfh1,N,Sin3A,z,HDAC6,HDAC4a,HDAC3,sna,Med,da,
CHR2R	20770216	20770716	NKAIN	twi,sens,HDAC1,dl,prd,Su(var)3-9,jumu,Lpt,CBP,ttk,HDAC4a,HDAC3,sna,Med,da,EcR,
CHR2R	20778197	20778697	Ance-5	twi,dl,HDAC4a,su(Hw),Med,da,
CHR2R	20830064	20830564	Tina-1	HDAC1,gro,Tbp,bon,Trl,trem,dl,gsb-n,Lpt,eve,HDAC11,HDAC4a,
CHR2R	20831848	20832348	CG15861	gro,HDAC4a,Su(H),Trl,CBP,chinmo,
CHR2R	20850780	20851280	CG2765	bon,HDAC1,Trl,dl,
CHR2R	20856840	20857340	RpL19	Tbp,HDAC4a,twi,HDAC1,dl,HDAC3,Sin3A,HDAC6,HDAC11,D,hkb,dm,Med,da,
CHR2R	20859310	20859810	Phk-3	twi,Trl,HDAC3,
CHR2R	20874235	20874735	CG3829	gro,twi,yki,Su(H),sens,HDAC1,Trl,dl,bin,Su(var)3-9,jumu,pan,Lpt,z,disco,Dll,hkb,Med,da,
CHR2R	20889345	20889845	zip	hkb,da,
CHR2R	2089581	2090081	CG30431	dl,Mef2,sna,da,
CHR2R	20896274	20896774	zip	sens,dl,cad,psq,
CHR2R	20897015	20897515	zip	bcd,twi,HDAC1,dl,ttk,HDAC4a,psq,HDAC3,hb,Med,da,
CHR2R	20898008	20898508	zip	HDAC1,mod(mdg4),CTCF,bcd,Tbp,HDAC4a,twi,sens,usp,Trl,dl,HDAC3,prd,jumu,eve,z,CBP,HDAC6,Mef2,D,psq,hb,Med,da,
CHR2R	20898824	20899324	zip	CTCF,mod(mdg4),GATAe,HDAC11,Tbp,HDAC4a,twi,Stat92E,sens,HDAC1,bab1,Trl,trem,dl,HDAC3,prd,Su(var)3-9,Ubx,zfh1,jumu,eve,Sin3A,z,CBP,disco,HDAC6,Mef2,D,psq,hkb,dm,Kr,hb,Med,da,
CHR2R	20939857	20940357	gsb-n	CTCF,twi,HDAC1,dl,Trl,prd,Pcl,h,Dll,HDAC4a,hth,da,
CHR2R	20953643	20954143	gsb	hth,tin,twi,sens,dl,prd,Mef2,Med,da,
CHR2R	20968200	20968700	gol	sens,
CHR2R	20971469	20971969	gol	CTCF,mod(mdg4),Tbp,HDAC1,bab1,Trl,trem,dl,kn,Mef2,CBP,HDAC4a,dm,
CHR2R	21002906	21003406	CG30430	Mef2,HDAC1,Trl,dl,CG8478,z,HDAC4a,
CHR2R	2108797	2109297	bin3	HDAC1,Tbp,Snr1,twi,Trl,trem,dl,Mef2,CG8478,gsb-n,prd,Su(var)3-9,zfh1,cad,bap,N,HDAC6,eve,HDAC11,D,HDAC4a,Med,da,
CHR2R	21145739	21146239	CG9380	-
CHR2R	2133936	2134436	Pld	-
CHR2R	2164294	2164794	Pld	-
CHR2R	218160	218660	IntS3	HP1b,sbb,
CHR2R	2186285	2186785	Pld	-
CHR2R	2199748	2200248	Pld	-
CHR2R	2278477	2278977	jing	-
CHR2R	2286099	2286599	jing	CTCF,Trl,su(Hw),mod(mdg4),CBP,
CHR2R	2309960	2310460	jing	CTCF,mod(mdg4),CBP,
CHR2R	2357686	2358186	jing	-
CHR2R	2376161	2376661	jing	-
CHR2R	2386400	2386900	jing	-
CHR2R	2399920	2400420	jing	twi,dl,
CHR2R	2404970	2405470	jing	gro,twi,dl,prd,cad,D,Med,da,
CHR2R	2409924	2410424	CR43905	EcR,
CHR2R	2416822	2417322	CR43905	hth,gro,HDAC4a,Mef2,HDAC1,bin,Su(var)3-9,en,
CHR2R	2434241	2434741	CR43905	gro,usp,dl,h,brm,
CHR2R	2440181	2440681	CR43905	-
CHR2R	2497204	2497704	jing	gro,Tbp,twi,yki,Su(H),Trl,dl,CG8478,mod(mdg4),CBP,Dll,HDAC4a,Med,da,
CHR2R	2515682	2516182	CG33919	gro,twi,yki,Su(H),sens,HDAC1,Trl,dl,cad,Su(var)3-9,CG8478,jumu,Dll,hkb,HDAC3,cnc,Med,da,
CHR2R	2517311	2517811	Vha16-1	hth,gro,HDAC11,HDAC4a,tin,twi,sens,HDAC1,Trl,dl,Mef2,Med,da,
CHR2R	2519823	2520323	Vha16-1	HDAC1,gro,HDAC11,Tbp,Snr1,tin,twi,Mef2,yki,Su(H),cnc,Trl,dl,fru,CG8478,gsb-n,prd,sc,zfh1,Hr78,N,Sin3A,z,Dfd,HDAC6,CG16778,Dll,HDAC4a,lola,dm,hb,Med,da,
CHR2R	2532627	2533127	Fmo-2	HDAC1,Su(var)3-9,HDAC11,HDAC4a,HDAC3,CTCF,
CHR2R	2549158	2549658	Dpit47	CTCF,Sin3A,mod(mdg4),Tbp,HDAC4a,twi,Mef2,HDAC1,Trl,dl,kn,E(z),HDAC3,Su(var)3-9,jumu,Lpt,z,HDAC6,HDAC11,D,dm,sens,CG8478,Med,
CHR2R	2550420	2550920	Adf1	CTCF,gro,HDAC11,Tbp,HDAC4a,twi,Mef2,yki,usp,HDAC1,Dfd,dl,fru,E(z),bin,CG8478,cad,tll,Su(var)3-9,sc,Hr78,Lpt,eve,Sin3A,br,h,HDAC6,CG16778,EcR,brm,prd,Med,da,
CHR2R	2566705	2567205	Tdc1	chinmo,
CHR2R	2583951	2584451	Rab2	CTCF,HDAC1,Tbp,twi,sens,Trl,dl,HDAC3,prd,Sin3A,h,HDAC6,Mef2,dm,cnc,Med,
CHR2R	2589645	2590145	CR43611	chinmo,
CHR2R	2637509	2638009	Eb1	HDAC1,GATAe,twi,Mef2,sens,Trl,dl,CG8478,N,z,disco,D,HDAC3,Med,da,
CHR2R	2638838	2639338	Eb1	sens,EcR,HDAC3,usp,
CHR2R	2675648	2676148	Epac	gro,tin,twi,Mef2,bin,bap,CBP,da,
CHR2R	2676257	2676757	Epac	gro,tin,twi,Mef2,bin,bap,CBP,hth,da,
CHR2R	2699629	2700129	koi	twi,Mef2,sens,HDAC1,bin,dl,HDAC3,ttk,HDAC4a,da,
CHR2R	2712046	2712546	CG15236	-
CHR2R	2757287	2757787	coro	gro,twi,Mef2,dl,CBP,da,
CHR2R	2759674	2760174	coro	gro,Ubx,HDAC11,Tbp,HDAC4a,twi,Mef2,yki,Su(H),sens,HDAC1,Trl,trem,dl,fru,E(z),CG8478,prd,Su(var)3-9,slp1,Hr78,jumu,Lpt,N,Sin3A,z,disco,h,HDAC6,Dll,D,Abd-B,Eip74EF,hb,CTCF,Med,da,
CHR2R	2765909	2766409	Spn4	gro,twi,yki,Su(H),Trl,dl,CBP,ttk,Dll,dm,
CHR2R	2768198	2768698	Spn42Dc	Trl,HDAC4a,CTCF,
CHR2R	2848982	2849482	mim	twi,Mef2,dl,pan,sna,Med,da,
CHR2R	2872988	2873488	vimar	HDAC1,Sin3A,GATAe,CTCF,Ubx,Tbp,twi,sens,bin,Trl,dl,prd,Su(var)3-9,cad,z,kni,HDAC6,HDAC11,Mef2,HDAC4a,dm,Med,da,
CHR2R	2878465	2878965	Tsp42Ea	-
CHR2R	2898549	2899049	Tsp42Ed	HDAC1,CTCF,Snr1,sens,dl,Trl,mod(mdg4),HDAC11,HDAC4a,HP1b,
CHR2R	2901606	2902106	Tsp42Ee	twi,dl,CBP,
CHR2R	2902549	2903049	Tsp42Ee	twi,dl,cnc,
CHR2R	2912478	2912978	Tsp42Ef	CTCF,gro,twi,Su(H),sens,Trl,dl,CG8478,kni,
CHR2R	2918992	2919492	Tsp42Eh	-
CHR2R	293551	294051	Gprk1	HP1b,
CHR2R	2976244	2976744	esn	gro,Tbp,dm,sbb,
CHR2R	3059570	3060070	pk	HDAC1,Trl,dl,Mef2,
CHR2R	3088533	3089033	pk	-
CHR2R	3116278	3116778	Or43a	su(Hw),Pcl,
CHR2R	3123185	3123685	Or43a	-
CHR2R	3130509	3131009	Ady43A	-
CHR2R	3136368	3136868	Gadd45	gro,yki,Su(H),Trl,dl,ttk,cad,Dll,Stat92E,chinmo,sbb,
CHR2R	3138150	3138650	Gadd45	twi,Trl,Stat92E,CBP,cnc,
CHR2R	3144941	3145441	CG1850	-
CHR2R	3156682	3157182	CG1850	-
CHR2R	3257953	3258453	Dscam	Snr1,twi,hkb,da,
CHR2R	3262993	3263493	Dscam	-
CHR2R	3264037	3264537	Dscam	twi,dl,pan,EcR,
CHR2R	3266660	3267160	Dscam	tin,twi,dl,cnc,sna,Med,da,
CHR2R	3338998	3339498	fa2h	twi,sens,
CHR2R	3344873	3345373	Inos	gro,twi,pan,Su(H),cnc,bin,Trl,dl,Mef2,gsb-n,tll,HDAC11,CTCF,Med,da,
CHR2R	3350290	3350790	CG11127	HDAC1,CTCF,Ubx,Trl,trem,dl,HDAC3,gsb-n,Su(var)3-9,HDAC4a,Sin3A,HDAC6,HDAC11,E(z),Med,
CHR2R	3357567	3358067	p47	chinmo,Hr39,CTCF,
CHR2R	3376135	3376635	wech	HDAC1,GATAe,CTCF,gro,Tbp,tin,twi,pan,Mef2,yki,Su(H),sens,bin,Trl,dl,E(z),CG8478,gsb-n,prd,tll,mod(mdg4),jumu,Lpt,Sin3A,z,br,disco,HDAC11,CG16778,Dll,hkb,D,HDAC4a,hb,Med,da,
CHR2R	3378906	3379406	Coop	twi,Trl,dl,prd,ttk,HDAC3,sens,sna,Med,da,
CHR2R	3380189	3380689	Coop	twi,HDAC1,Trl,dl,prd,Su(var)3-9,jumu,Lpt,disco,HDAC11,ttk,HDAC4a,psq,Med,da,
CHR2R	3418195	3418695	CG1600	HDAC1,gro,Tbp,HDAC4a,tin,twi,Mef2,cnc,sens,bin,Trl,dl,CG8478,prd,slp1,Lpt,cad,HDAC6,HDAC11,hth,hb,CTCF,Med,da,
CHR2R	3427211	3427711	CG1598	CTCF,Ubx,HDAC11,HDAC4a,twi,HDAC1,dl,Sin3A,HDAC6,HDAC3,da,
CHR2R	3454008	3454508	boca	HDAC1,Sin3A,HDAC11,HDAC4a,twi,yki,dl,Mef2,bin,Trl,Su(var)3-9,br,HDAC6,ttk,D,HDAC3,Med,da,
CHR2R	3473957	3474457	blow	Trl,HDAC4a,HDAC3,CBP,ttk,chinmo,HDAC11,sbb,
CHR2R	3495022	3495522	CG1358	cnc,
CHR2R	3511246	3511746	CG43340	Trl,sbb,
CHR2R	3513662	3514162	CG43340	gro,chinmo,
CHR2R	3519760	3520260	CG43341	gro,Su(H),cnc,su(Hw),Trl,mod(mdg4),CBP,Dll,chinmo,
CHR2R	3551196	3551696	CG2065	cnc,Trl,
CHR2R	3563369	3563869	U2A	HDAC1,mod(mdg4),Trl,dl,E(z),HDAC3,Sin3A,z,CBP,HDAC6,chinmo,dm,sens,Med,
CHR2R	3567062	3567562	CG1399	-
CHR2R	3569162	3569662	CG1399	Su(H),Trl,HDAC3,
CHR2R	3581659	3582159	CG1399	gro,bin,Trl,cad,
CHR2R	3608154	3608654	CG18812	cad,cnc,
CHR2R	3615117	3615617	CG18812	CTCF,sens,su(Hw),mod(mdg4),
CHR2R	3620312	3620812	CG18812	-
CHR2R	3630276	3630776	CG30497	Trl,CG8478,cnc,
CHR2R	3638813	3639313	CG30497	prd,
CHR2R	3645060	3645560	CG30497	twi,Trl,
CHR2R	3653490	3653990	CG30497	Trl,CG8478,
CHR2R	3659079	3659579	CG30497	D,
CHR2R	3664051	3664551	CG30497	bin,Trl,eve,
CHR2R	3666874	3667374	CG30497	gro,Su(H),Trl,dl,
CHR2R	3692758	3693258	Nop17l	HDAC1,CTCF,HDAC11,Tbp,HDAC4a,bon,twi,Trl,dl,bin,mod(mdg4),Sin3A,z,ttk,HDAC6,da,
CHR2R	3693687	3694187	Nop17l	HDAC1,mod(mdg4),CTCF,Tbp,twi,sens,Trl,dl,CG8478,Su(var)3-9,zfh1,Hr78,bap,N,Sin3A,z,HDAC6,HDAC4a,dm,Med,da,
CHR2R	3700111	3700611	CG1882	HDAC1,mod(mdg4),CTCF,Ubx,Tbp,HDAC4a,cnc,Trl,dl,su(Hw),Sin3A,CBP,HDAC6,HDAC11,ttk,chinmo,dm,HDAC3,sens,Med,
CHR2R	3724395	3724895	CG12821	chinmo,
CHR2R	3749255	3749755	Dgk	hth,
CHR2R	37600	38100	CG40127	-
CHR2R	3770890	3771390	Dgk	su(Hw),
CHR2R	3799796	3800296	CG12159	-
CHR2R	3840986	3841486	CG14764	-
CHR2R	3871584	3872084	ACC	gro,yki,dl,Trl,N,chinmo,HDAC3,
CHR2R	3875878	3876378	Nup44A	HDAC1,gro,twi,Trl,dl,prd,Med,da,
CHR2R	3876477	3876977	Nup44A	CTCF,HDAC1,Ubx,Tbp,twi,sens,bin,Trl,dl,fru,E(z),su(Hw),prd,Su(var)3-9,mod(mdg4),slp1,jumu,Sin3A,disco,HDAC6,D,Med,da,EcR,
CHR2R	3918564	3919064	Optix	Tbp,tin,twi,HDAC1,dl,CG8478,Trl,prd,sc,Hr78,jumu,N,Mef2,z,Pcl,Dfd,disco,h,Dll,Stat92E,Abd-B,HDAC4a,hkb,lola,Med,da,cad,
CHR2R	3925537	3926037	Optix	-
CHR2R	3956273	3956773	lig	CTCF,gro,Tbp,bon,twi,sens,usp,HDAC1,Trl,psq,dl,E(z),CG8478,HDAC3,prd,tll,slp1,Hr78,jumu,N,Sin3A,z,br,disco,EcR,dm,hb,sna,Med,da,
CHR2R	3974555	3975055	sut2	su(Hw),HDAC3,
CHR2R	4010261	4010761	Nup50	CTCF,mod(mdg4),Tbp,twi,sens,HDAC1,Trl,trem,dl,CG8478,HDAC3,prd,jumu,Sin3A,disco,HDAC6,hkb,dm,cnc,sna,Med,da,
CHR2R	4032359	4032859	Lpin	HDAC1,gro,HDAC4a,twi,Trl,dl,ttk,psq,cnc,HDAC3,da,
CHR2R	4033639	4034139	Lpin	HDAC1,gro,twi,Trl,dl,eve,HDAC11,cnc,sna,Med,da,
CHR2R	4042530	4043030	kermit	GATAe,HDAC11,HDAC4a,twi,sens,HDAC1,Trl,dl,prd,HDAC6,HDAC3,sbb,da,
CHR2R	4124893	4125393	pnut	CTCF,tll,HDAC1,gro,Tbp,HDAC4a,tin,twi,Mef2,yki,Su(H),sens,Trl,dl,CG8478,prd,Su(var)3-9,Hr78,Lpt,bap,N,Sin3A,z,disco,h,HDAC6,HDAC11,hkb,Med,da,
CHR2R	4126202	4126702	pnut	dl,h,ttk,chinmo,CG8478,
CHR2R	4130025	4130525	pnut	HDAC1,twi,sens,Trl,gro,dl,E(z),gsb-n,pan,cad,z,HDAC11,Med,da,
CHR2R	4159904	4160404	CG30371	bon,yki,HDAC1,Trl,dl,Su(var)3-9,z,Dll,CG8478,
CHR2R	4239653	4240153	CG11635	CBP,
CHR2R	440084	440584	Stlk	HP1b,
CHR2R	4420015	4420515	mtt	twi,
CHR2R	4440031	4440531	CG12780	su(Hw),
CHR2R	4475605	4476105	CG14752	-
CHR2R	4485141	4485641	CG8735	HDAC3,
CHR2R	4495313	4495813	CG8642	twi,dl,EcR,da,
CHR2R	4523062	4523562	CG8635	hth,twi,gro,dl,prd,slp1,CBP,da,
CHR2R	4532463	4532963	ptc	gro,HDAC4a,Trl,HDAC11,
CHR2R	453370	453870	Stlk	HP1b,
CHR2R	4536725	4537225	ptc	hth,HDAC1,gro,Tbp,twi,yki,Su(H),Trl,dl,CG8478,Su(var)3-9,Hr78,Lpt,N,insv,Dfd,HDAC11,Dll,hkb,HDAC4a,h,dm,en,Med,da,
CHR2R	4540377	4540877	ptc	gro,twi,Su(H),bab1,Trl,dl,CG8478,CTCF,
CHR2R	4540883	4541383	ptc	hth,tin,twi,Trl,gro,dl,cnc,pan,disco,CTCF,Med,
CHR2R	4543033	4543533	ptc	hth,mod(mdg4),GATAe,gro,bcd,twi,sens,Trl,dl,prd,sc,jumu,pan,Lpt,cad,D,N,Mef2,z,CBP,disco,Dll,hkb,en,hb,sna,Med,shn,da,
CHR2R	4553399	4553899	Acsl	HDAC1,CTCF,gro,twi,yki,Su(H),sens,bab1,Trl,trem,dl,CG8478,mod(mdg4),Hr78,N,Sin3A,Dll,HDAC4a,Med,
CHR2R	4555076	4555576	Acsl	HDAC1,gro,Tbp,twi,yki,Trl,dl,kn,Mef2,slp1,Hr78,Lpt,CBP,ttk,Med,da,
CHR2R	4557732	4558232	Acsl	gro,Tbp,HDAC4a,twi,Mef2,yki,Su(H),HDAC1,Trl,dl,HDAC11,Dll,Med,da,
CHR2R	4558412	4558912	Acsl	gro,Tbp,HDAC4a,twi,usp,HDAC1,Trl,dl,Mef2,N,CBP,HDAC11,Abd-B,Med,da,
CHR2R	4609020	4609520	CG30357	Trl,cad,
CHR2R	4686745	4687245	sns	mod(mdg4),tin,twi,Mef2,dl,CBP,h,Dll,chinmo,
CHR2R	4776279	4776779	CG8272	HDAC3,CBP,chinmo,
CHR2R	4783616	4784116	sec31	HDAC3,chinmo,sna,
CHR2R	4789155	4789655	Ggamma1	HDAC1,GATAe,twi,sens,dl,HDAC3,jumu,Sin3A,disco,HDAC6,hkb,Med,
CHR2R	4793967	4794467	CG8258	CTCF,Ubx,Tbp,twi,HDAC1,trem,dl,HDAC3,cad,Sin3A,CBP,HDAC6,HDAC11,ttk,chinmo,hb,cnc,Med,
CHR2R	4810036	4810536	CG8243	HDAC11,CTCF,Tbp,HDAC4a,twi,sens,HDAC1,dl,HDAC3,ttk,Sin3A,HDAC6,Med,da,
CHR2R	4836639	4837139	CG33199	HDAC3,chinmo,
CHR2R	4865545	4866045	CG8213	dl,da,
CHR2R	4944070	4944570	CG13743	twi,su(Hw),dl,mod(mdg4),dm,
CHR2R	4944982	4945482	CG13743	su(Hw),
CHR2R	4947363	4947863	CG13743	Trl,kni,Dll,chinmo,su(Hw),dm,
CHR2R	4954947	4955447	ana	CTCF,
CHR2R	4980209	4980709	CG8080	HDAC1,GATAe,HDAC4a,Mef2,yki,dl,Trl,EcR,dm,
CHR2R	5017657	5018157	CG18659	Trl,Med,
CHR2R	5031168	5031668	shrb	Tbp,HDAC4a,HDAC1,trem,dl,E(z),HDAC3,Sin3A,HDAC6,D,Med,
CHR2R	5032987	5033487	CG30344	HDAC1,Ubx,HDAC11,HDAC4a,twi,trem,dl,Sin3A,CBP,HDAC6,HDAC3,cnc,Med,
CHR2R	5067466	5067966	ltd	su(Hw),chinmo,
CHR2R	5072719	5073219	ltd	twi,chinmo,
CHR2R	5077037	5077537	CG8026	cnc,
CHR2R	5078899	5079399	CG8026	HDAC1,GATAe,twi,sens,Trl,dl,HDAC6,HDAC11,ttk,HDAC4a,
CHR2R	5099880	5100380	VhaAC45	hth,pan,disco,
CHR2R	5118876	5119376	Cyp4p2	Tbp,twi,sens,Trl,dl,mod(mdg4),Lpt,sna,Med,da,
CHR2R	5130069	5130569	Cyp4p3	cnc,
CHR2R	5145326	5145826	Pkn	twi,chinmo,HDAC3,da,
CHR2R	5167822	5168322	Pkn	da,
CHR2R	5169940	5170440	Pkn	HDAC4a,dl,HDAC3,da,
CHR2R	5171682	5172182	Pkn	HDAC1,CTCF,gro,Tbp,HDAC4a,twi,yki,Su(H),Trl,dl,Mef2,E(z),CG8478,tll,mod(mdg4),pan,HDAC11,HDAC3,hb,Med,da,
CHR2R	5187720	5188220	Drep-2	-
CHR2R	5190722	5191222	Myd88	cnc,
CHR2R	5191351	5191851	Myd88	-
CHR2R	5195537	5196037	Myd88	CTCF,gro,bon,yki,bin,HDAC1,Trl,trem,Mef2,Su(var)3-9,kni,h,cad,Dll,
CHR2R	5258198	5258698	CG12158	chinmo,
CHR2R	5272641	5273141	CG13954	-
CHR2R	5277164	5277664	l(2)03659	HDAC1,gro,yki,Trl,E(z),
CHR2R	5302343	5302843	wun2	twi,sens,HDAC1,Trl,dl,Su(var)3-9,slp1,HDAC11,HDAC4a,Med,da,
CHR2R	5318208	5318708	Pdk	gro,bon,Trl,eve,cnc,
CHR2R	5323010	5323510	ced-6	HDAC3,
CHR2R	5326502	5327002	ced-6	Trl,HDAC6,
CHR2R	5328969	5329469	ced-6	hth,gro,Tbp,twi,yki,Su(H),cnc,usp,HDAC1,bab1,Trl,dl,gsb-n,prd,slp1,Lpt,Sin3A,disco,eve,HDAC11,Dll,HDAC4a,dm,brm,sna,Med,da,
CHR2R	5331977	5332477	ced-6	HDAC1,Trl,dl,Su(var)3-9,h,HDAC11,CTCF,
CHR2R	5344634	5345134	Camta	-
CHR2R	5394164	5394664	brp	Trl,
CHR2R	5404929	5405429	brp	CBP,su(Hw),
CHR2R	5406724	5407224	brp	yki,Trl,dl,CBP,
CHR2R	5408735	5409235	brp	Trl,su(Hw),dl,
CHR2R	5431490	5431990	CG1888	bin,Trl,dl,Mef2,eve,
CHR2R	54380	54880	CG40127	sens,Trl,HP1b,
CHR2R	5438046	5438546	CR43651	twi,sens,dl,
CHR2R	5440521	5441021	CR43651	GATAe,HDAC11,Tbp,HDAC4a,twi,Mef2,HDAC1,bin,Trl,dl,CG8478,mod(mdg4),z,disco,HDAC6,D,dm,HDAC3,
CHR2R	5441445	5441945	CR43651	mod(mdg4),Mef2,Su(H),HDAC1,bin,Trl,dl,E(z),CG8478,N,z,eve,HDAC3,
CHR2R	5452696	5453196	CG1809	mod(mdg4),HDAC4a,bon,su(Hw),Trl,dl,Mef2,CG8478,Abd-B,cnc,
CHR2R	5497673	5498173	CR44069	CTCF,twi,CBP,cnc,da,
CHR2R	5542956	5543456	Mmp2	hth,
CHR2R	5574527	5575027	Mmp2	HDAC3,
CHR2R	5599702	5600202	dap	HDAC1,gro,Tbp,yki,Su(H),Trl,psq,dl,CG8478,gsb-n,Su(var)3-9,Lpt,N,Sin3A,z,HDAC6,eve,HDAC11,Mef2,Dll,HDAC4a,HDAC3,Med,
CHR2R	5667231	5667731	CG1698	chinmo,
CHR2R	566814	567314	CG17883	HP1b,
CHR2R	5700534	5701034	lectin-46Cb	-
CHR2R	5729317	5729817	CG1599	HDAC1,CTCF,Ubx,Tbp,HDAC4a,sens,dl,HDAC3,Sin3A,z,HDAC6,sna,Med,
CHR2R	574166	574666	CG17883	-
CHR2R	5749203	5749703	CG1516	gro,Su(H),cnc,Trl,dl,Mef2,Dll,HDAC4a,pan,
CHR2R	5811346	5811846	Mef2	su(Hw),
CHR2R	5814404	5814904	Mef2	N,Trl,
CHR2R	5815546	5816046	Mef2	-
CHR2R	5817142	5817642	Mef2	gro,Tbp,bon,twi,Mef2,yki,Su(H),su(Hw),HDAC1,Trl,dl,CG8478,gsb-n,sc,Hr78,N,z,Dfd,cad,Dll,Abd-B,lola,da,
CHR2R	5837035	5837535	Mef2	gro,bon,yki,Su(H),Trl,dl,HDAC4a,eve,cnc,
CHR2R	5842702	5843202	Mef2	mod(mdg4),gro,Tbp,bon,twi,yki,Su(H),HDAC1,Trl,dl,Su(var)3-9,Lpt,insv,CBP,Dll,psq,Med,da,EcR,
CHR2R	5845873	5846373	Mef2	CTCF,gro,Ubx,Tbp,twi,yki,Su(H),HDAC1,Trl,dl,Sin3A,z,HDAC6,HDAC11,Dll,D,HDAC4a,hkb,dm,Med,
CHR2R	5856298	5856798	Adam	HDAC11,HDAC4a,twi,HDAC1,Trl,dl,HDAC3,Sin3A,HDAC6,psq,CTCF,Med,da,
CHR2R	5875634	5876134	TER94	HDAC1,CTCF,gro,HDAC4a,bon,yki,su(Hw),bab1,dl,cnc,Trl,mod(mdg4),z,Pcl,Dll,Med,
CHR2R	5876490	5876990	TER94	CTCF,HDAC1,mod(mdg4),GATAe,Tbp,HDAC4a,cnc,su(Hw),bab1,dl,kn,Trl,jumu,Sin3A,z,HDAC6,HP1b,hkb,dm,Med,EcR,
CHR2R	5913006	5913506	Pka-R2	HDAC1,gro,bon,Mef2,yki,Su(H),cnc,Trl,dl,CG8478,cad,gsb-n,Su(var)3-9,CBP,kni,Dll,Abd-B,
CHR2R	5932836	5933336	CG34220	Trl,CG8478,eve,psq,cnc,
CHR2R	5934810	5935310	oys	HDAC1,twi,dl,prd,psq,hb,Med,da,
CHR2R	5963664	5964164	CG1371	twi,dl,cad,Med,shn,
CHR2R	5966094	5966594	egr	twi,HDAC1,Trl,dl,Su(var)3-9,slp1,CG8478,ttk,Med,da,
CHR2R	5984583	5985083	Jra	HDAC1,GATAe,CTCF,Ubx,Tbp,sens,Trl,dl,kn,HDAC3,cnc,mod(mdg4),jumu,Sin3A,HDAC6,ttk,D,HDAC4a,Med,
CHR2R	5986914	5987414	14-3-3zeta	HDAC1,mod(mdg4),CTCF,Tbp,HDAC4a,twi,Trl,dl,HDAC3,Su(var)3-9,Ubx,jumu,Sin3A,z,CBP,HDAC6,HDAC11,dm,sna,Med,da,
CHR2R	5988723	5989223	14-3-3zeta	HDAC1,gro,Tbp,twi,Mef2,yki,Su(H),Trl,dl,CG8478,mod(mdg4),Hr78,N,h,Dll,Abd-B,HDAC4a,psq,dm,Med,da,
CHR2R	5990928	5991428	14-3-3zeta	Mef2,Trl,dl,
CHR2R	6012225	6012725	gem	HDAC1,GATAe,CTCF,Tbp,HDAC4a,twi,Mef2,yki,sens,Trl,trem,dl,E(z),mod(mdg4),jumu,Lpt,Sin3A,disco,HDAC6,D,hkb,dm,sna,Med,da,
CHR2R	6013041	6013541	gem	GATAe,twi,HDAC1,Trl,dl,disco,sna,da,
CHR2R	6047381	6047881	CG12214	CTCF,gro,lola,bon,yki,Su(H),cnc,HDAC1,bin,Trl,dl,E(z),CG8478,gsb-n,Su(var)3-9,kni,HDAC11,Dll,Abd-B,dm,brm,EcR,
CHR2R	6107509	6108009	Hr46	Mef2,yki,Su(H),Trl,Dfd,dl,E(z),Su(var)3-9,Lpt,z,eve,HDAC11,EcR,CG8478,usp,
CHR2R	6115138	6115638	Hr46	gro,bon,yki,Su(H),Trl,dl,Su(var)3-9,N,insv,pan,EcR,Dll,Hr39,psq,E(z),usp,
CHR2R	6139358	6139858	Syb	HDAC1,CTCF,lola,Tbp,twi,bin,bab1,Trl,dl,kn,mod(mdg4),Sin3A,HDAC6,HDAC11,HDAC4a,dm,HDAC3,Med,
CHR2R	6157050	6157550	CAP	-
CHR2R	6158523	6159023	CAP	hth,tll,twi,pan,yki,HDAC1,Trl,dl,E(z),gsb-n,Lpt,HDAC11,HDAC4a,h,Med,da,
CHR2R	6160173	6160673	CAP	su(Hw),mod(mdg4),
CHR2R	6163656	6164156	CAP	twi,bin,gro,dl,Trl,eve,tin,
CHR2R	6166372	6166872	CAP	gro,twi,dl,
CHR2R	6190117	6190617	CAP	GATAe,gro,bon,yki,Su(H),Trl,dl,CG8478,Su(var)3-9,HDAC11,Dll,
CHR2R	6308435	6308935	CG11825	HDAC1,gro,Ubx,bcd,Tbp,tin,twi,yki,Su(H),bin,Trl,dl,Mef2,CG8478,prd,zfh1,slp1,Hr78,N,z,Dfd,Abd-B,lola,Eip74EF,hb,Stat92E,Med,da,
CHR2R	6311659	6312159	Prx2540-1	HDAC1,Tbp,tin,twi,Su(H),bin,Trl,dl,CG8478,prd,mod(mdg4),zfh1,slp1,Hr78,N,z,CBP,Dfd,HDAC4a,lola,Stat92E,Med,da,
CHR2R	6315281	6315781	CG12896	HDAC1,tin,twi,Mef2,Su(H),bin,Trl,dl,su(Hw),prd,mod(mdg4),zfh1,slp1,Hr78,CG8478,N,z,CBP,lola,Med,da,
CHR2R	6317843	6318343	RanBPM	HDAC1,gro,Tbp,tin,twi,Mef2,yki,Su(H),bin,Trl,dl,CG8478,HDAC3,mod(mdg4),zfh1,slp1,Hr78,Lpt,N,z,insv,cad,Dll,Abd-B,psq,cnc,Med,da,
CHR2R	6364242	6364742	whd	GATAe,gro,pan,usp,HDAC1,Trl,Dfd,dl,cad,jumu,Lpt,disco,HDAC11,D,Hr39,psq,da,
CHR2R	6367417	6367917	CG17765	HDAC1,Tbp,HDAC4a,twi,sens,Trl,dl,E(z),bin,HDAC3,slp1,Sin3A,z,disco,HDAC6,HDAC11,Mef2,dm,Med,
CHR2R	6417746	6418246	lola	HDAC1,su(Hw),Trl,dl,HDAC3,CTCF,
CHR2R	6421403	6421903	lola	HDAC1,CTCF,Tbp,tin,twi,Mef2,Su(H),bin,Trl,dl,HDAC3,prd,mod(mdg4),zfh1,z,CBP,ttk,HDAC4a,hb,Med,da,
CHR2R	6422075	6422575	lola	CTCF,hth,HDAC1,gro,bcd,Tbp,tin,twi,Mef2,yki,Su(H),bin,Trl,dl,E(z),CG8478,prd,mod(mdg4),zfh1,Lpt,cad,bap,z,CBP,disco,Dll,D,HDAC4a,HDAC3,hb,sna,Med,da,
CHR2R	6427781	6428281	lola	HDAC1,gro,Tbp,tin,twi,Mef2,yki,Su(H),bin,Trl,dl,kn,CG8478,cnc,prd,zfh1,Lpt,z,eve,HDAC4a,psq,HDAC3,hb,Med,da,
CHR2R	6433136	6433636	lola	HDAC1,HDAC4a,Trl,dl,
CHR2R	6445484	6445984	psq	HDAC1,CTCF,Ubx,sens,bab1,Trl,psq,dl,CG8478,pan,Lpt,eve,N,Sin3A,z,CBP,disco,D,HDAC4a,hb,cnc,Med,HDAC11,da,
CHR2R	6446275	6446775	psq	Kr,HDAC1,gro,bon,twi,yki,sens,bab1,Trl,dl,CG8478,Su(var)3-9,Lpt,N,z,CBP,HDAC11,HDAC4a,psq,hb,Med,da,
CHR2R	6451948	6452448	psq	CTCF,gro,bon,yki,Trl,psq,dl,CG8478,Su(var)3-9,N,z,Dll,EcR,
CHR2R	6456190	6456690	psq	gro,Trl,psq,su(Hw),dl,CG8478,N,z,HDAC11,Abd-B,
CHR2R	6459500	6460000	psq	-
CHR2R	6469135	6469635	psq	tll,gro,bcd,twi,usp,HDAC1,dl,CG8478,prd,Hr78,Lpt,cad,eve,HDAC11,D,Stat92E,Mef2,hb,E(z),sna,Med,da,
CHR2R	6487993	6488493	CG11883	Trl,dl,CG8478,Hr39,
CHR2R	6489021	6489521	CG11883	gro,Trl,dl,CG8478,
CHR2R	6500276	6500776	CG11883	HDAC3,
CHR2R	652879	653379	CG17082	-
CHR2R	6532486	6532986	Git	CTCF,HDAC1,mod(mdg4),Ubx,Tbp,twi,Mef2,sens,bab1,Trl,dl,E(z),tll,HDAC3,N,Sin3A,Dfd,HDAC6,HDAC11,HDAC4a,dm,CG8478,sna,Med,da,cad,
CHR2R	6562128	6562628	stan	HDAC1,twi,sens,dl,Trl,Lpt,disco,D,sna,Med,da,
CHR2R	6621108	6621608	CG7220	gro,bin,Trl,HDAC3,
CHR2R	6622644	6623144	CG7220	gro,bin,Trl,cnc,
CHR2R	6623535	6624035	CG7220	Trl,cad,HDAC3,
CHR2R	6664892	6665392	CG33144	Trl,
CHR2R	6698273	6698773	mms4	CTCF,HDAC1,HDAC11,Tbp,HDAC4a,twi,Trl,trem,dl,E(z),HDAC3,Sin3A,br,HDAC6,dm,Med,
CHR2R	6700665	6701165	CG12341	HDAC1,CTCF,Ubx,Tbp,HDAC4a,twi,trem,dl,HDAC3,prd,zfh1,Sin3A,disco,HDAC6,HDAC11,Med,da,
CHR2R	6748731	6749231	CG30015	HDAC4a,sens,HDAC1,bab1,dl,CG8478,Trl,HDAC6,hkb,dm,cnc,cad,
CHR2R	6753740	6754240	CG30015	-
CHR2R	6754632	6755132	CG30015	CG8478,
CHR2R	6758352	6758852	CG30015	tin,dl,bap,Mef2,bin,twi,hkb,Med,da,
CHR2R	6778714	6779214	cag	GATAe,sens,HDAC3,CBP,
CHR2R	6804338	6804838	Obp47a	tin,Mef2,su(Hw),bap,twi,
CHR2R	6851321	6851821	Spn47C	dl,
CHR2R	6920814	6921314	CG43188	HDAC4a,da,
CHR2R	6931688	6932188	CG43188	twi,cad,pan,
CHR2R	6933515	6934015	CG43188	bin,bap,
CHR2R	6950026	6950526	CG43188	pan,
CHR2R	6958010	6958510	CG43188	dl,chinmo,
CHR2R	6959255	6959755	CG43188	Trl,prd,CG8478,
CHR2R	6962084	6962584	CG43188	-
CHR2R	6976454	6976954	CG43189	HDAC4a,twi,CTCF,
CHR2R	6977549	6978049	CG43189	hth,twi,sens,dl,prd,D,disco,Med,da,
CHR2R	6983786	6984286	CG43189	twi,bin,eve,
CHR2R	6985612	6986112	luna	-
CHR2R	6992144	6992644	luna	Mef2,bin,eve,twi,
CHR2R	6993351	6993851	luna	HDAC1,lola,bin,Trl,dl,mod(mdg4),bap,eve,
CHR2R	701100	701600	CG17528	-
CHR2R	7018582	7019082	BBS4	CTCF,su(Hw),
CHR2R	7032457	7032957	CG13231	HDAC4a,Trl,da,
CHR2R	7063233	7063733	shn	gro,HDAC1,Trl,dl,psq,cnc,
CHR2R	7073151	7073651	shn	HDAC1,bon,Su(H),cnc,Trl,dl,Mef2,HDAC3,HDAC6,eve,
CHR2R	7075144	7075644	shn	twi,dl,cnc,
CHR2R	7078213	7078713	shn	tll,bcd,twi,Trl,dl,prd,cad,hb,sna,Med,shn,da,
CHR2R	7080380	7080880	shn	twi,su(Hw),Trl,dl,Med,
CHR2R	7082177	7082677	shn	gro,HDAC4a,Mef2,HDAC1,bin,Trl,dl,Su(var)3-9,usp,Lpt,cad,bap,CBP,HDAC11,twi,hth,tin,Med,EcR,
CHR2R	7083088	7083588	shn	hth,HDAC4a,tin,twi,Mef2,sens,HDAC1,bin,Trl,gro,dl,kn,E(z),cad,ttk,zfh1,pan,Lpt,bap,eve,HDAC11,
CHR2R	7084479	7084979	shn	hth,Kr,HDAC1,gro,Tbp,tin,twi,pan,Mef2,yki,Su(H),Stat92E,cnc,sens,Trl,Mad,dl,E(z),CG8478,gsb-n,prd,tll,Lpt,cad,eve,bap,N,HDAC11,HDAC4a,psq,brm,hb,sna,Med,shn,da,
CHR2R	7086006	7086506	shn	tll,Kr,HDAC1,GATAe,CTCF,gro,bcd,Tbp,tin,twi,Mef2,Stat92E,sens,bin,Trl,Mad,dl,CG8478,cnc,prd,Su(var)3-9,zfh1,slp1,pan,Lpt,cad,kni,bap,D,disco,ftz,h,ttk,HDAC4a,hkb,brm,HDAC3,hb,E(z),sna,Med,usp,shn,da,
CHR2R	7089796	7090296	shn	HDAC1,gro,bon,Mef2,yki,Su(H),cnc,Trl,dl,gsb-n,CG8478,Lpt,z,CBP,HDAC11,twi,HDAC4a,psq,dm,tin,
CHR2R	7090832	7091332	shn	gro,Tbp,bon,Su(H),cnc,HDAC1,Trl,psq,dl,Mef2,E(z),CG8478,Hr78,N,z,CBP,HDAC11,Dll,Abd-B,pan,HDAC6,dm,
CHR2R	7092385	7092885	shn	gro,twi,Trl,dl,CG8478,CBP,CG16778,Stat92E,cnc,Med,da,
CHR2R	7094366	7094866	shn	cad,
CHR2R	7095959	7096459	shn	twi,dl,
CHR2R	71390	71890	CG40127	HP1b,
CHR2R	7252004	7252504	CG13204	gro,bon,twi,Su(H),Trl,dl,CG8478,N,insv,chinmo,Hr39,h,CTCF,
CHR2R	7258391	7258891	Tapdelta	Tbp,HDAC1,dl,HDAC3,Su(var)3-9,HDAC11,ttk,HDAC6,dm,CTCF,
CHR2R	7271497	7271997	Sod3	gro,Su(H),Trl,cad,Dll,HDAC3,hb,
CHR2R	7340048	7340548	E(Pc)	CTCF,HDAC1,mod(mdg4),Ubx,HDAC11,Tbp,twi,dl,kn,E(z),HDAC3,Su(var)3-9,slp1,jumu,HDAC4a,Sin3A,CBP,kni,HDAC6,dm,hb,Med,da,
CHR2R	7359419	7359919	inv	CTCF,dl,HDAC4a,HDAC6,
CHR2R	7362294	7362794	inv	hth,GATAe,gro,twi,sens,HDAC1,Trl,dl,CG8478,tll,disco,Dll,HDAC4a,en,hb,Med,da,
CHR2R	7378794	7379294	inv	en,
CHR2R	741068	741568	CG14464	Trl,dl,HP1b,
CHR2R	7421177	7421677	en	dl,prd,Pcl,en,da,
CHR2R	7481443	7481943	tou	hth,gro,twi,Su(H),sens,HDAC1,Trl,dl,tll,sc,Hr78,N,z,HDAC11,Abd-B,psq,hb,Med,da,
CHR2R	7489018	7489518	tou	gro,bon,twi,bin,Trl,dl,usp,disco,Dll,HDAC4a,psq,Med,da,
CHR2R	7490465	7490965	tou	CTCF,Kr,gro,bon,twi,Mef2,yki,cnc,sens,HDAC1,Trl,dl,kn,CG8478,Su(var)3-9,sc,zfh1,pan,Lpt,N,CBP,h,HDAC11,Dll,Stat92E,psq,hth,tin,Med,da,
CHR2R	7492294	7492794	tou	Kr,HDAC1,mod(mdg4),gro,Tbp,bon,twi,yki,Su(H),Trl,dl,E(z),CG8478,Su(var)3-9,Lpt,z,CBP,h,HDAC6,Mef2,Dll,HDAC4a,psq,hth,tin,Hr78,hb,Med,da,
CHR2R	749419	749919	CG14464	-
CHR2R	7496506	7497006	tou	twi,dl,Trl,Med,da,
CHR2R	7503413	7503913	CR43907	HDAC1,bcd,Tbp,twi,Trl,dl,CG8478,prd,slp1,Hr78,bap,N,Mef2,z,Dfd,disco,Abd-B,HDAC4a,psq,hb,cnc,sna,Med,da,
CHR2R	7514003	7514503	CG9005	HDAC1,CTCF,gro,Tbp,twi,Mef2,yki,Su(H),bin,Trl,dl,br,HDAC4a,Med,da,
CHR2R	7520701	7521201	CG9005	HDAC1,CTCF,gro,Tbp,tin,twi,Mef2,Su(H),usp,bin,Trl,dl,CG8478,prd,zfh1,slp1,Hr78,Lpt,N,z,Eip74EF,hb,Med,da,
CHR2R	752200	752700	CG14464	-
CHR2R	7524271	7524771	CG9005	HDAC1,gro,twi,yki,Su(H),usp,Trl,dl,CG8478,Su(var)3-9,EcR,da,
CHR2R	7525821	7526321	CG9005	twi,usp,dl,cad,pan,Trl,HDAC3,da,
CHR2R	752827	753327	CG14464	-
CHR2R	7533431	7533931	CG9003	gro,Trl,Dfd,dl,HDAC11,
CHR2R	753941	754441	CG14464	-
CHR2R	754527	755027	CG14464	-
CHR2R	7551230	7551730	Tret1-1	Trl,cnc,
CHR2R	7553107	7553607	Tret1-1	Kr,gro,Mef2,yki,Su(H),Trl,dl,N,Dll,cnc,
CHR2R	7553649	7554149	Tret1-1	Kr,gro,yki,Su(H),Trl,su(Hw),dl,Dll,cnc,da,
CHR2R	755917	756417	CG44102	-
CHR2R	7602904	7603404	pyr	dl,da,
CHR2R	7626606	7627106	pyr	twi,lola,da,
CHR2R	763319	763819	CG44102	dl,HP1b,
CHR2R	7658632	7659132	ths	-
CHR2R	7667317	7667817	CG42493	-
CHR2R	7697943	7698443	CG13192	twi,Mef2,cad,da,
CHR2R	7718575	7719075	CG13192	E(z),
CHR2R	7725791	7726291	Sobp	HDAC4a,HDAC1,dl,Mef2,prd,twi,
CHR2R	7779951	7780451	snoRNA:Me28S-A1322	HDAC1,gro,Tbp,Snr1,twi,yki,Trl,dl,CG8478,HDAC3,gsb-n,prd,Su(var)3-9,jumu,N,Sin3A,z,HDAC6,HDAC11,Dll,D,sc,HDAC4a,hkb,dm,E(z),cnc,Med,usp,da,EcR,
CHR2R	7786822	7787322	CG13189	Tbp,HDAC1,dl,Su(var)3-9,Sin3A,HDAC6,HDAC4a,HDAC3,Med,
CHR2R	7896055	7896555	otk	bin,gro,bap,hth,tin,
CHR2R	7915385	7915885	pds5	HDAC1,GATAe,CTCF,Ubx,bcd,HDAC11,Tbp,twi,sens,Trl,dl,kn,E(z),tll,mod(mdg4),jumu,eve,Sin3A,CBP,HDAC6,D,HDAC4a,hkb,dm,HDAC3,Med,da,
CHR2R	7919303	7919803	CG8321	HDAC3,
CHR2R	798569	799069	CG44102	-
CHR2R	7989566	7990066	jeb	dl,Mef2,HDAC4a,eve,Trl,
CHR2R	8035877	8036377	Hen1	HDAC3,chinmo,
CHR2R	8037498	8037998	Hen1	HDAC1,Tbp,twi,dl,HDAC3,N,Sin3A,HDAC6,psq,HDAC11,Med,
CHR2R	8053052	8053552	CG34232	HDAC3,
CHR2R	8055801	8056301	Oda	mod(mdg4),HDAC11,Tbp,HDAC4a,twi,HDAC1,dl,HDAC3,cad,Trl,Sin3A,h,HDAC6,dm,hb,Med,da,
CHR2R	8058632	8059132	Oda	twi,dl,ttk,HDAC3,da,
CHR2R	806172	806672	CG44102	HP1b,
CHR2R	8146764	8147264	CR43900	HDAC1,CTCF,gro,Tbp,twi,Trl,psq,dl,mod(mdg4),Dll,dm,cnc,Med,
CHR2R	8148850	8149350	CR43900	HDAC1,mod(mdg4),gro,Tbp,yki,Su(H),Trl,psq,dl,Mef2,E(z),prd,z,Dll,Abd-B,hkb,dm,hb,
CHR2R	8149979	8150479	Cam	cnc,dl,Mef2,psq,
CHR2R	8151160	8151660	Cam	psq,
CHR2R	8175221	8175721	CG42700	-
CHR2R	8230171	8230671	CG8839	dl,cnc,
CHR2R	8269347	8269847	CG8501	-
CHR2R	8344208	8344708	Lac	HDAC1,dl,da,
CHR2R	8393414	8393914	fdl	Trl,dl,pan,cnc,da,
CHR2R	8417711	8418211	fra	tll,HDAC1,bcd,twi,dl,CBP,hb,E(z),cnc,HDAC3,sna,Med,da,
CHR2R	8422631	8423131	fra	twi,dl,da,
CHR2R	8475279	8475779	Sin3A	HDAC1,gro,Tbp,tin,twi,Mef2,yki,Su(H),bin,Trl,psq,trem,dl,CG8478,zfh1,Hr78,Lpt,N,z,CBP,Dll,Abd-B,HDAC3,hb,Med,da,
CHR2R	8476821	8477321	CR30055	HDAC1,CTCF,gro,Ubx,bcd,HDAC11,Tbp,HDAC4a,tin,twi,Mef2,yki,Su(H),Trl,trem,dl,kn,bin,CG8478,prd,zfh1,Lpt,bap,N,Sin3A,z,disco,HDAC6,Dll,psq,HDAC3,hb,cnc,sna,Med,da,cad,
CHR2R	8549222	8549722	nemy	bin,
CHR2R	8565256	8565756	CG42708	Trl,
CHR2R	857434	857934	CG44104	sens,HP1b,
CHR2R	8619790	8620290	mos	Trl,CTCF,
CHR2R	8628521	8629021	mos	CTCF,gro,CBP,HDAC11,
CHR2R	8644869	8645369	Dgkepsilon	HDAC1,GATAe,CTCF,HDAC11,Tbp,HDAC4a,twi,sens,Trl,dl,su(Hw),HDAC3,mod(mdg4),Ubx,jumu,Sin3A,CBP,disco,HDAC6,sna,Med,
CHR2R	8669489	8669989	sca	sens,dl,
CHR2R	8737463	8737963	CG17574	-
CHR2R	8749664	8750164	CG17574	-
CHR2R	8755893	8756393	CG17574	HDAC1,bin,Trl,dl,zfh1,cad,CTCF,Med,
CHR2R	876736	877236	CG44104	-
CHR2R	8777492	8777992	vg	HDAC4a,HDAC11,da,
CHR2R	8780022	8780522	vg	Dfd,Pcl,Hr39,HDAC11,
CHR2R	8795949	8796449	NAT1	su(Hw),CBP,
CHR2R	8796974	8797474	NAT1	HDAC4a,su(Hw),
CHR2R	8807427	8807927	NAT1	HDAC3,jumu,D,chinmo,
CHR2R	8811913	8812413	sug	Mef2,cnc,sens,HDAC1,HDAC3,ttk,
CHR2R	8814676	8815176	sug	gro,HDAC4a,cnc,Mef2,cad,Su(var)3-9,h,chinmo,
CHR2R	8815743	8816243	sug	HDAC4a,bon,twi,Mef2,cnc,dl,Su(var)3-9,chinmo,
CHR2R	882087	882587	CG44104	HP1b,
CHR2R	8839591	8840091	CG3884	-
CHR2R	8845789	8846289	CG13321	hth,HDAC1,bcd,HDAC11,Tbp,HDAC4a,tin,twi,Mef2,Trl,gro,dl,E(z),bin,prd,Su(var)3-9,Lpt,cad,eve,bap,z,disco,HDAC6,psq,en,hb,Med,da,
CHR2R	8867556	8868056	Psc	tll,HDAC1,gro,bcd,Tbp,tin,twi,Mef2,sens,bin,Trl,psq,Mad,dl,CG8478,prd,Su(var)3-9,slp1,pan,Lpt,cad,bap,z,D,sc,HDAC4a,HDAC3,hb,Med,da,
CHR2R	8872270	8872770	Psc	hth,HDAC1,gro,bcd,tin,twi,Mef2,Su(H),bin,Trl,psq,dl,kn,slp1,Hr78,usp,CG8478,Lpt,bap,z,Dfd,kni,HDAC4a,lola,Eip74EF,hb,CTCF,Med,da,
CHR2R	8872883	8873383	Psc	tll,HDAC1,gro,bcd,Tbp,tin,twi,Mef2,yki,Su(H),Trl,psq,dl,kn,bin,prd,slp1,Lpt,z,Dfd,h,Dll,HDAC4a,hb,CTCF,Med,shn,da,
CHR2R	8878034	8878534	CG33798	gro,bon,Trl,psq,dl,kn,CG8478,Su(H),Hr78,Lpt,N,h,Mef2,Dll,Abd-B,twi,HDAC4a,
CHR2R	8879029	8879529	CG33798	hth,gro,Tbp,twi,HDAC1,Trl,psq,dl,Mef2,CG8478,prd,Hr78,usp,pan,Lpt,bap,N,Dfd,h,HDAC11,Abd-B,HDAC4a,lola,tin,Eip74EF,Med,da,cad,
CHR2R	8893414	8893914	Su(z)2	twi,Trl,dl,pan,bap,bin,Mef2,Med,
CHR2R	8896518	8897018	Su(z)2	gro,cad,lola,N,h,
CHR2R	890016	890516	CR44105	HP1b,
CHR2R	8901711	8902211	Su(z)2	Trl,dl,hth,
CHR2R	8903193	8903693	Su(z)2	gro,Tbp,bon,yki,Su(H),HDAC1,Trl,dl,CG8478,Su(var)3-9,Hr78,N,insv,EcR,Dll,HDAC4a,
CHR2R	8907862	8908362	Su(z)2	dl,hb,
CHR2R	8919752	8920252	CG13323	gro,bon,sens,bin,Trl,dl,
CHR2R	8922714	8923214	CG13323	gro,HDAC4a,bon,yki,Su(H),HDAC1,Trl,Dfd,dl,E(z),CG8478,Hr78,usp,eve,HDAC11,Dll,psq,hth,cnc,
CHR2R	8926195	8926695	CG13323	HDAC1,mod(mdg4),gro,Tbp,HDAC4a,Su(H),Trl,dl,E(z),Su(var)3-9,CG8478,N,Mef2,Dll,Abd-B,dm,
CHR2R	8982620	8983120	Drl-2	CTCF,
CHR2R	90037	90537	CG40127	HP1b,
CHR2R	9004314	9004814	CG13325	-
CHR2R	9109624	9110124	Fsn	CTCF,Tbp,twi,HDAC1,Trl,dl,CG8478,HDAC3,prd,Su(var)3-9,jumu,Sin3A,CBP,h,HDAC6,HDAC11,HDAC4a,Med,da,
CHR2R	9110877	9111377	Dp	mod(mdg4),Tbp,twi,Mef2,cnc,usp,HDAC1,Trl,dl,E(z),CG8478,Su(H),prd,Hr78,Lpt,N,z,h,bin,HDAC11,ttk,Abd-B,HDAC4a,hb,sna,Med,da,
CHR2R	913228	913728	CR44105	HP1b,
CHR2R	9147156	9147656	CG42319	CBP,
CHR2R	9220955	9221455	CG17048	twi,Trl,CBP,
CHR2R	9222325	9222825	CG17048	CBP,
CHR2R	9224091	9224591	CG17048	HDAC1,gro,Tbp,twi,sens,Trl,dl,prd,Mef2,z,HDAC6,HDAC4a,hb,Med,da,
CHR2R	9224965	9225465	CG17048	HDAC1,CTCF,gro,Tbp,twi,yki,Su(H),Trl,dl,CG8478,prd,Mef2,z,CBP,Dll,HDAC4a,HDAC6,hb,Med,da,
CHR2R	9230357	9230857	CG17048	twi,HDAC1,Trl,dl,su(Hw),mod(mdg4),Lpt,Mef2,ttk,tin,Med,da,
CHR2R	9234509	9235009	CG17048	CTCF,su(Hw),sbb,
CHR2R	9336030	9336530	cnn	HDAC1,Tbp,twi,Mef2,bin,Trl,dl,cad,z,HDAC4a,HDAC3,sna,Med,da,
CHR2R	9337667	9338167	cnn	CTCF,HDAC1,Ubx,Tbp,HDAC4a,twi,Su(H),bin,su(Hw),Trl,trem,dl,E(z),prd,slp1,jumu,Sin3A,br,disco,HDAC6,HDAC11,Mef2,D,HP1b,dm,Med,da,
CHR2R	9363322	9363822	CG43192	Su(var)3-9,
CHR2R	9369281	9369781	arr	HDAC1,twi,dl,slp1,Mef2,HDAC11,Med,da,
CHR2R	9379678	9380178	bbc	cnc,HDAC3,
CHR2R	9380921	9381421	bbc	HDAC1,ttk,HDAC3,cnc,
CHR2R	9384247	9384747	bbc	HDAC3,
CHR2R	9387601	9388101	mars	HDAC4a,twi,Trl,dl,jumu,disco,HDAC11,hkb,Med,usp,da,EcR,
CHR2R	9389521	9390021	mars	HDAC1,gro,Tbp,twi,yki,Su(H),Stat92E,Trl,dl,CG8478,HDAC3,cad,prd,Lpt,N,Mef2,Sin3A,HDAC6,Dll,Abd-B,HDAC4a,Eip74EF,Med,da,
CHR2R	9473194	9473694	CG6191	Tbp,dl,Mef2,cnc,ttk,zfh1,eve,dm,Med,
CHR2R	9487140	9487640	CG43058	-
CHR2R	9514659	9515159	fas	su(Hw),Trl,
CHR2R	9612453	9612953	CG6280	twi,da,
CHR2R	9710084	9710584	fl(2)d	HDAC1,twi,yki,Su(H),Trl,dl,kni,eve,Med,
CHR2R	9759187	9759687	CG13344	HDAC3,
CHR2R	9782972	9783472	shot	Trl,Mef2,
CHR2R	9803281	9803781	shot	-
CHR2R	9807103	9807603	shot	sens,Trl,eve,psq,
CHR2R	9809265	9809765	shot	Su(var)3-9,
CHR2R	9810474	9810974	shot	dl,E(z),eve,
CHR2R	9817854	9818354	shot	-
CHR2R	9824552	9825052	shot	twi,Trl,cad,prd,Med,da,
CHR2R	9841285	9841785	AGO1	CTCF,Tbp,HDAC4a,tin,twi,usp,HDAC1,Trl,dl,E(z),CG8478,prd,mod(mdg4),sc,zfh1,Hr78,jumu,Lpt,bap,N,Mef2,Sin3A,z,Dfd,h,HDAC6,EcR,Abd-B,dm,hb,Med,da,
CHR2R	9845098	9845598	AGO1	CTCF,gro,yki,Su(H),HDAC1,su(Hw),bab1,Trl,dl,CG8478,mod(mdg4),Hr78,N,Dll,Abd-B,HDAC4a,h,HDAC3,Eip74EF,
CHR2R	9848643	9849143	Cp1	HDAC1,GATAe,CTCF,cnc,bin,su(Hw),psq,dl,mod(mdg4),zfh1,pan,disco,Med,
CHR2R	9850000	9850500	Cp1	twi,dl,Mef2,HDAC3,da,
CHR2R	9851299	9851799	CG42806	CTCF,GATAe,HDAC11,Tbp,HDAC4a,Mef2,HDAC1,Trl,dl,cad,disco,D,cnc,
CHR2R	9865798	9866298	CG6701	twi,dl,HDAC3,
CHR2R	9874835	9875335	RN-tre	HDAC3,cnc,
CHR2R	9877606	9878106	RN-tre	HDAC1,gro,Ubx,Tbp,Trl,dl,CG8478,Hr78,N,Sin3A,z,HDAC11,HDAC4a,Eip74EF,Med,
CHR2R	9882981	9883481	mam	gro,twi,HDAC1,Trl,dl,Hr78,CG8478,Lpt,N,disco,HDAC4a,tin,Med,da,
CHR2R	9892429	9892929	mam	CTCF,Tbp,twi,dl,Mef2,da,
CHR2R	9894257	9894757	mam	gro,Tbp,HDAC4a,Mef2,yki,Su(H),HDAC1,Trl,dl,bin,Su(var)3-9,z,insv,Dll,Abd-B,dm,HDAC3,cnc,Med,
CHR2R	9905772	9906272	mam	-
CHR2R	9922239	9922739	mam	Trl,
CHR2R	9936768	9937268	mam	prd,
CHR3L	1006124	1006624	trio	sens,su(Hw),Trl,jumu,CTCF,
CHR3L	10103363	10103863	CG42826	twi,dl,cnc,
CHR3L	10216537	10217037	scramb1	sens,HDAC3,EcR,HDAC11,
CHR3L	10217524	10218024	scramb1	CTCF,HDAC1,bab1,Su(var)3-9,br,HDAC6,Hr39,HDAC11,HDAC3,
CHR3L	10220293	10220793	scramb1	Pcl,
CHR3L	1031059	1031559	CG9205	GATAe,gro,pan,Su(H),sens,dl,HDAC11,HDAC4a,psq,CTCF,
CHR3L	10337014	10337514	CR43990	hth,gro,Ubx,HDAC4a,Trl,Su(var)3-9,eve,HDAC11,
CHR3L	10342955	10343455	CR43990	hth,usp,
CHR3L	10347747	10348247	CR43990	twi,CG8478,
CHR3L	10355649	10356149	CR43990	bin,dl,cad,eve,HDAC11,
CHR3L	10359677	10360177	CR43990	Tbp,eve,
CHR3L	10365379	10365879	CR43990	-
CHR3L	10378727	10379227	CR43990	-
CHR3L	10381024	10381524	CR43990	twi,dl,
CHR3L	10385665	10386165	CR43990	HDAC1,gro,dl,prd,hth,
CHR3L	104088	104588	CG12483	-
CHR3L	10419980	10420480	Ir67b	CTCF,bab1,mod(mdg4),kni,HDAC4a,
CHR3L	10432427	10432927	Ir67c	-
CHR3L	10509352	10509852	A2bp1	HDAC1,bcd,Tbp,twi,Mef2,Trl,psq,dl,prd,Su(var)3-9,Lpt,Sin3A,z,Dll,HDAC4a,dm,hb,Med,da,cad,
CHR3L	10521385	10521885	A2bp1	-
CHR3L	10525197	10525697	A2bp1	twi,dl,da,
CHR3L	10528467	10528967	A2bp1	dl,
CHR3L	10533904	10534404	CG6527	su(Hw),
CHR3L	10542830	10543330	CG6527	eve,
CHR3L	10578068	10578568	CG6527	twi,Dfd,dl,h,da,
CHR3L	1060541	1061041	CG9205	su(Hw),
CHR3L	1064133	1064633	CG9205	CTCF,dl,CBP,su(Hw),
CHR3L	10648621	10649121	CG32066	twi,
CHR3L	10651326	10651826	CG32066	Kr,HDAC4a,Trl,Mef2,CG8478,HDAC11,
CHR3L	10653486	10653986	CG32066	HDAC1,Tbp,twi,Trl,dl,slp1,pan,Sin3A,z,disco,eve,D,psq,hb,E(z),Med,da,
CHR3L	10658860	10659360	simj	HDAC1,gro,HDAC11,Tbp,twi,yki,sens,usp,Trl,Dfd,dl,E(z),CG8478,gsb-n,tll,Hr78,cad,eve,N,HDAC6,Stat92E,HDAC3,hb,Med,da,
CHR3L	10668958	10669458	simj	twi,Trl,dl,kn,zfh1,Lpt,Mef2,eve,tin,hb,Med,usp,da,EcR,
CHR3L	10673849	10674349	CG11811	gro,yki,Su(H),cnc,Trl,dl,zfh1,
CHR3L	10674961	10675461	CG11811	GATAe,gro,twi,yki,Su(H),HDAC1,Trl,dl,E(z),CG8478,insv,disco,Dll,D,
CHR3L	10675955	10676455	CG11811	gro,Snr1,bon,HDAC1,Trl,Dfd,dl,cad,eve,HDAC11,hth,brm,usp,EcR,
CHR3L	10704606	10705106	NijA	gro,
CHR3L	10705930	10706430	NijA	Stat92E,
CHR3L	10725841	10726341	NijA	-
CHR3L	10730149	10730649	CG43245	gro,HDAC11,bon,Mef2,yki,Su(H),sens,HDAC1,Trl,dl,bin,CG8478,Su(var)3-9,Hr78,N,h,EcR,Dll,Abd-B,HDAC4a,hth,Eip74EF,
CHR3L	10732935	10733435	CG43245	gro,HDAC11,HDAC4a,bon,yki,Su(H),HDAC1,su(Hw),Trl,dl,E(z),CG8478,gsb-n,Su(var)3-9,Hr78,N,h,EcR,Dll,Abd-B,hth,lola,
CHR3L	1073491	1073991	bab1	-
CHR3L	10737158	10737658	CG43245	gro,hth,
CHR3L	10742960	10743460	CG43245	-
CHR3L	10766702	10767202	CG43245	-
CHR3L	10770934	10771434	CG43245	gro,HDAC4a,Trl,cnc,HDAC11,chinmo,EcR,
CHR3L	10776579	10777079	CG43245	HDAC4a,Mef2,eve,HDAC11,twi,
CHR3L	10777865	10778365	CG43245	cnc,
CHR3L	10781096	10781596	CG12523	Mef2,eve,EcR,usp,
CHR3L	10785640	10786140	CG12523	Hr39,
CHR3L	10786464	10786964	CG12523	gro,Trl,
CHR3L	10831228	10831728	tna	CTCF,Trl,eve,
CHR3L	1083744	1084244	bab1	dl,Mef2,cnc,
CHR3L	10843257	10843757	tna	hth,HDAC1,mod(mdg4),Ubx,HDAC11,tin,twi,Mef2,sens,bin,Trl,gro,dl,Su(var)3-9,slp1,pan,Lpt,cad,bap,z,CBP,eve,hb,Med,da,
CHR3L	10845401	10845901	tna	hth,gro,HDAC11,Tbp,HDAC4a,tin,twi,Mef2,usp,bin,HDAC1,Trl,dl,CG8478,Su(var)3-9,slp1,Lpt,cad,bap,z,disco,hb,CTCF,Med,da,EcR,
CHR3L	10849608	10850108	tna	CTCF,hth,Kr,HDAC1,gro,Ubx,HDAC11,Tbp,tin,bon,twi,Mef2,yki,Su(H),Trl,dl,kn,CG8478,prd,tll,Su(var)3-9,zfh1,Lpt,cad,bap,z,insv,kni,disco,h,Dll,Abd-B,HDAC4a,Hr78,en,hb,E(z),Med,usp,da,
CHR3L	10855191	10855691	tna	HDAC1,GATAe,CTCF,tin,twi,sens,dl,prd,slp1,jumu,kni,Mef2,z,disco,HDAC11,D,hkb,Trl,hb,sna,Med,da,
CHR3L	10858060	10858560	tna	su(Hw),HDAC1,dl,
CHR3L	10861017	10861517	tna	bon,su(Hw),dl,Trl,
CHR3L	10864277	10864777	tna	HDAC3,chinmo,Hr39,
CHR3L	10890915	10891415	Aps	HDAC1,CTCF,gro,Trl,dl,CG8478,mod(mdg4),zfh1,Hr78,pan,N,Sin3A,Abd-B,HDAC4a,psq,lola,Eip74EF,
CHR3L	1096568	1097068	bab1	hth,Ubx,HDAC4a,twi,Trl,gro,dl,slp1,cad,z,disco,HDAC11,Med,da,
CHR3L	10990280	10990780	snoRNA:Me18S-G962	Mef2,da,
[truncated: 3,500 more rows]

## Sheet: OSC enhancers
Chromosome	Start	Stop	Nearest TSS	Targeting TFs
CHR2L	10002287	10002787	CG31875	HDAC1,Kr,bin,trem,dl,slp1,HDAC11,
CHR2L	10009534	10010034	Trp1	sna,HDAC11,Su(var)3-9,HDAC1,gro,HDAC4a,z,Trl,CBP,yki,twi,Dll,HDAC3,Tbp,dl,hb,Med,Sin3A,HDAC6,CTCF,da,
CHR2L	1005723	1006223	CG4375	mod(mdg4),CTCF,HDAC4a,bab1,
CHR2L	10163457	10163957	CG13137	su(Hw),
CHR2L	10174997	10175497	CG13137	-
CHR2L	10379827	10380327	gny	HDAC11,HDAC1,ttk,HDAC3,CTCF,HDAC4a,dl,Med,Sin3A,HDAC6,
CHR2L	10394697	10395197	Mdh1	kn,ttk,sbb,HDAC3,
CHR2L	10426690	10427190	KdelR	cnc,HDAC1,CTCF,HDAC3,twi,Tbp,dl,slp1,hb,Med,Sin3A,Ubx,HDAC6,
CHR2L	10516811	10517311	Fatp	Sin3A,HDAC1,su(Hw),Ubx,mod(mdg4),CTCF,HDAC4a,trem,Trl,dl,bab1,Med,sens,HDAC6,HDAC11,kni,E(z),
CHR2L	10568250	10568750	CG6138	-
CHR2L	10580258	10580758	CG34160	-
CHR2L	10588445	10588945	CG34161	-
CHR2L	10591641	10592141	CG34161	-
CHR2L	10612855	10613355	CG7329	CTCF,gro,Dll,
CHR2L	10617707	10618207	CG7329	en,
CHR2L	107319	107819	Sam-S	cnc,HDAC1,HP1b,CTCF,Trl,yki,twi,Tbp,dl,Med,Sin3A,Ubx,HDAC6,HDAC11,da,
CHR2L	10732210	10732710	CG6750	cnc,HDAC1,HDAC4a,trem,HDAC3,sens,dl,Med,Sin3A,Mef2,HDAC6,HDAC11,D,kni,
CHR2L	10735731	10736231	Nup107	Hr78,Su(var)3-9,HDAC1,N,ttk,HP1b,hkb,chinmo,CTCF,Dfd,HDAC3,HDAC4a,dl,Med,Sin3A,Stat92E,HDAC11,HDAC6,Snr1,Eip74EF,Abd-B,lola,
CHR2L	10746013	10746513	CG6729	-
CHR2L	10749970	10750470	CG17124	-
CHR2L	1077602	1078102	S	sna,CG8478,HDAC1,N,CTCF,dm,gro,zfh1,HDAC4a,z,sc,pan,Trl,twi,h,HDAC3,Tbp,dl,hb,Med,Sin3A,disco,HDAC6,prd,HDAC11,da,lola,
CHR2L	10876402	10876902	CG12517	-
CHR2L	10936902	10937402	CG14072	-
CHR2L	10986803	10987303	piwi	CTCF,CBP,HDAC4a,HDAC1,HDAC11,
CHR2L	109954	110454	Sam-S	twi,HDAC3,dl,sens,da,
CHR2L	1100295	1100795	CG4629	-
CHR2L	11003930	11004430	RpL9	HDAC1,dm,HDAC4a,HDAC3,twi,Tbp,dl,Med,Sin3A,HDAC6,E(z),CTCF,
CHR2L	11045021	11045521	CG18666	Mef2,CG8478,su(Hw),gro,Trl,yki,bon,Dll,dl,EcR,Su(H),usp,
CHR2L	11049661	11050161	Samuel	Hr78,gro,dl,
CHR2L	11063624	11064124	Samuel	twi,
CHR2L	11066864	11067364	Samuel	sna,lola,cnc,Su(var)3-9,gsb-n,HDAC1,gro,Trl,yki,Dll,Tbp,dl,Su(H),hb,Med,
CHR2L	11096962	11097462	Ge-1	HDAC3,
CHR2L	11175224	11175724	CG4788	twi,dl,
CHR2L	1117965	1118465	Pino	sna,HDAC1,Mef2,CTCF,mod(mdg4),HDAC4a,bin,Trl,twi,dl,bab1,Med,brm,fru,Snr1,da,
CHR2L	11182679	11183179	CG4788	gro,Dll,
CHR2L	11190143	11190643	CG4788	hth,prd,da,cnc,HDAC1,
CHR2L	1120564	1121064	Pino	sna,twi,dl,hb,Med,prd,da,
CHR2L	11220968	11221468	ab	HDAC1,CG8478,gro,Trl,yki,Dll,Tbp,dl,HDAC11,
CHR2L	1122361	1122861	Pino	-
CHR2L	11289636	11290136	CR43409	-
CHR2L	11296599	11297099	CR43409	su(Hw),gro,prd,da,
CHR2L	11358281	11358781	salr	mod(mdg4),HDAC1,CTCF,CG8478,dm,Pcl,HDAC4a,Trl,yki,twi,h,Dll,dl,hb,Med,prd,da,
CHR2L	11412798	11413298	CG43681	hkb,
CHR2L	11460384	11460884	salm	-
CHR2L	1150365	1150865	Tfb4	HDAC1,HDAC3,Trl,HDAC4a,dl,HDAC11,Med,HDAC6,
CHR2L	11528021	11528521	CG31705	Trl,
CHR2L	1153178	1153678	CG4764	sna,ttk,chinmo,Trl,
CHR2L	11540673	11541173	CG43438	-
CHR2L	11547666	11548166	CG43438	-
CHR2L	11580303	11580803	Mst33A	-
CHR2L	11582283	11582783	Mst33A	Trl,hth,dl,Med,prd,Mef2,twi,
CHR2L	11653001	11653501	CG4983	GATAe,sbb,jumu,sens,
CHR2L	11676709	11677209	CG4988	-
CHR2L	1172511	1173011	CG5118	HDAC1,dm,HDAC3,Tbp,HDAC4a,dl,Med,Sin3A,HDAC11,HDAC6,
CHR2L	11806666	11807166	crol	CG8478,Hr78,Su(var)3-9,HDAC1,N,Mef2,psq,gro,CTCF,z,Trl,yki,bon,twi,Dll,Tbp,dl,Su(H),Lpt,Med,prd,da,
CHR2L	11807406	11807906	crol	CG8478,Hr78,Su(var)3-9,gsb-n,HDAC1,N,Mef2,dm,CTCF,gro,zfh1,HDAC4a,z,Trl,yki,sc,bon,twi,Dll,Tbp,psq,dl,Su(H),Lpt,Med,jumu,disco,prd,Eip74EF,Abd-B,D,da,E(z),lola,
CHR2L	11813371	11813871	CycY	HDAC1,HDAC4a,h,Tbp,dl,Med,Sin3A,HDAC6,
CHR2L	11829179	11829679	esc	HDAC1,dm,CTCF,HDAC4a,Trl,dl,Sin3A,HDAC6,D,Ubx,
CHR2L	11914563	11915063	Pde1c	su(Hw),
CHR2L	11950662	11951162	CG16964	dl,
CHR2L	11963321	11963821	CR43314	E(z),
CHR2L	12045997	12046497	CG6770	cnc,eve,gro,Trl,bin,psq,dl,kni,
CHR2L	12054230	12054730	JhI-21	-
CHR2L	12056101	12056601	RpL7-like	HDAC1,gro,HDAC4a,z,HDAC3,Trl,yki,twi,Tbp,dl,Su(H),tin,Med,Sin3A,disco,HDAC6,
CHR2L	12096281	12096781	Mt2	HDAC1,dm,ttk,HDAC3,twi,Tbp,HDAC4a,dl,Med,Sin3A,HDAC6,
CHR2L	12151643	12152143	CG31760	-
CHR2L	12192537	12193037	aret	-
CHR2L	12194693	12195193	aret	-
CHR2L	1220034	1220534	CG42329	-
CHR2L	12240741	12241241	aret	CG8478,twi,da,
CHR2L	12247762	12248262	aret	sbb,su(Hw),
CHR2L	12273267	12273767	aret	-
CHR2L	12280238	12280738	aret	sbb,
CHR2L	12349664	12350164	bru-2	pan,
CHR2L	12365907	12366407	bru-2	sna,CG8478,cnc,Su(var)3-9,gsb-n,HDAC1,bin,hth,gro,Trl,yki,twi,Dll,dl,Su(H),tin,prd,da,
CHR2L	12369576	12370076	bru-2	-
CHR2L	12436009	12436509	Elf	Sin3A,Su(var)3-9,HDAC1,ttk,dm,HDAC4a,trem,z,br,CBP,yki,twi,HDAC3,Tbp,psq,dl,hb,Med,HDAC11,Ubx,HDAC6,Snr1,da,
CHR2L	12461095	12461595	bun	eve,hth,gro,z,Trl,yki,twi,Dll,Tbp,HDAC1,dl,cad,Su(H),slp1,hb,Lpt,Med,Eip74EF,da,
CHR2L	12480007	12480507	bun	Trl,dl,
CHR2L	12482999	12483499	bun	mod(mdg4),HDAC1,Mef2,eve,gro,z,Trl,Dll,yki,Tbp,dl,Su(H),da,E(z),
CHR2L	12483963	12484463	bun	mod(mdg4),lola,HDAC1,GATAe,Mef2,bin,eve,hth,gro,usp,Trl,Dll,yki,dl,Su(H),sens,disco,cad,HDAC11,D,E(z),
CHR2L	12487249	12487749	bun	Mef2,eve,bin,
CHR2L	12507665	12508165	CR43051	Su(var)3-9,su(Hw),gro,z,Trl,yki,twi,Dll,dl,Su(H),slp1,Med,disco,cad,D,da,HDAC1,
CHR2L	12513855	12514355	snoRNA:CG43051-a	Mef2,Trl,HDAC1,
CHR2L	12515119	12515619	snoRNA:CG43051-a	CTCF,
CHR2L	12521175	12521675	snoRNA:CG43051-a	Su(var)3-9,CG8478,eve,CTCF,gro,HDAC4a,z,Trl,yki,Tbp,psq,dl,hb,bab1,Med,HDAC1,
CHR2L	12524005	12524505	snoRNA:CG43051-a	Trl,
CHR2L	12529539	12530039	CR42746	Hr78,Su(var)3-9,HDAC1,Mef2,cad,CG8478,gro,hth,HDAC4a,Trl,yki,bon,twi,Dll,Tbp,dl,EcR,Su(H),Lpt,Med,Eip74EF,HDAC11,
CHR2L	12543108	12543608	CR42746	HDAC1,CG8478,gro,HDAC4a,Trl,yki,twi,Dll,dl,Su(H),hb,Med,disco,da,
CHR2L	12544534	12545034	CR42746	HDAC1,kn,Trl,CG8478,twi,psq,dl,hb,Med,da,
CHR2L	12545847	12546347	bun	CG8478,Hr78,mod(mdg4),lola,HDAC1,N,gro,Dfd,Trl,yki,sc,twi,Dll,Tbp,dl,Su(H),hb,Med,Sin3A,disco,Mef2,Eip74EF,Abd-B,da,E(z),
CHR2L	1255650	1256150	robo3	mod(mdg4),Trl,
CHR2L	12692742	12693242	CG6153	cnc,HDAC1,dm,HDAC4a,Trl,twi,HDAC3,Tbp,dl,slp1,Med,Sin3A,HDAC6,prd,
CHR2L	12704270	12704770	CG5776	Su(var)3-9,HDAC1,dm,Trl,twi,HDAC3,Tbp,HDAC4a,dl,Med,Sin3A,HDAC11,HDAC6,da,E(z),
CHR2L	12719172	12719672	MRP	cnc,HDAC1,Trl,HDAC3,sens,
CHR2L	12730874	12731374	MRP	sna,twi,su(Hw),dl,Med,da,
CHR2L	1274826	1275326	robo3	chinmo,
CHR2L	12771417	12771917	CG15483	-
CHR2L	12781918	12782418	CG15483	-
CHR2L	12788875	12789375	CR43818	-
CHR2L	1279654	1280154	robo3	-
CHR2L	12822196	12822696	kek1	ttk,Trl,twi,Dll,dl,Su(H),
CHR2L	12823875	12824375	kek1	gro,Trl,Dll,
CHR2L	12836788	12837288	kek1	-
CHR2L	12854433	12854933	kek1	Trl,yki,bon,twi,Dll,dl,Su(H),Mef2,
CHR2L	12940985	12941485	ACXE	su(Hw),
CHR2L	12950164	12950664	CG16800	Trl,su(Hw),
CHR2L	12974310	12974810	Vha68-2	mod(mdg4),lola,cnc,gsb-n,HDAC1,CG8478,gro,CTCF,Trl,yki,Dll,hkb,psq,dl,Su(H),kni,
CHR2L	1301985	1302485	a5	-
CHR2L	13020783	13021283	A16	Su(var)3-9,HDAC1,ttk,HDAC3,dl,Sin3A,HDAC6,CTCF,
CHR2L	13059703	13060203	CG9932	Su(var)3-9,gsb-n,Mef2,CG8478,gro,Trl,yki,Dll,Tbp,dl,Su(H),insv,
CHR2L	13066784	13067284	CG9932	-
CHR2L	13076551	13077051	CG9932	-
CHR2L	13078361	13078861	CG9932	bin,
CHR2L	13089963	13090463	CG5142	cnc,Trl,
CHR2L	13101159	13101659	CG5142	Trl,Hr39,
CHR2L	13165586	13166086	DnaJ-H	cnc,Su(var)3-9,Stat92E,HDAC1,GATAe,psq,hkb,gro,HDAC4a,z,HDAC3,Trl,yki,twi,Tbp,dl,Hr39,hb,Lpt,Med,jumu,Sin3A,disco,Ubx,HDAC6,HDAC11,da,E(z),
CHR2L	13203685	13204185	Pect	HDAC11,Sin3A,Su(var)3-9,HDAC1,GATAe,bin,HDAC4a,z,Trl,HDAC3,Tbp,dl,slp1,Med,disco,Ubx,HDAC6,Mef2,D,
CHR2L	13219683	13220183	CG9426	HDAC11,HDAC1,GATAe,kn,hkb,CTCF,twi,HDAC3,Tbp,HDAC4a,dl,Med,Sin3A,Mef2,HDAC6,
CHR2L	1325867	1326367	a5	-
CHR2L	13311026	13311526	CG43779	tll,
CHR2L	13352397	13352897	CG9395	chinmo,Pcl,HDAC11,
CHR2L	13387262	13387762	CG7099	HDAC1,Trl,twi,HDAC3,HDAC4a,dl,Ubx,HDAC6,cad,HDAC11,
CHR2L	13449290	13449790	Hsp60D	sna,
CHR2L	13456549	13457049	CG42809	dl,
CHR2L	13513337	13513837	CG33640	cnc,gsb-n,HDAC1,gro,Pcl,HDAC4a,Trl,yki,twi,h,Dll,Tbp,dl,Su(H),Lpt,Med,usp,fru,Eip74EF,HDAC11,insv,da,
CHR2L	13513911	13514411	CG33640	cnc,gsb-n,HDAC1,CG8478,gro,HDAC4a,Trl,yki,twi,Dll,dl,Su(H),Med,usp,HDAC11,da,
CHR2L	13547310	13547810	B4	HDAC1,Su(H),bon,twi,h,dl,Med,da,
CHR2L	13547863	13548363	B4	CG8478,HDAC11,HDAC1,Su(H),HDAC4a,tll,yki,bon,twi,h,Dfd,Tbp,dl,Med,sens,HDAC6,da,
CHR2L	13554632	13555132	kuz	bin,eve,dl,HDAC1,
CHR2L	13560371	13560871	kuz	-
CHR2L	13570835	13571335	kuz	eve,twi,brm,usp,
CHR2L	13579028	13579528	CG9254	-
CHR2L	13614604	13615104	CG9254	CG8478,
CHR2L	13640576	13641076	ics	HDAC1,CG8478,eve,HDAC3,br,twi,Tbp,dl,Med,HDAC6,
CHR2L	13642193	13642693	ics	eve,dm,Trl,Tbp,cad,bab1,
CHR2L	13683760	13684260	CG18507	su(Hw),
CHR2L	1372137	1372637	CG14346	-
CHR2L	13732980	13733480	CG31813	su(Hw),mod(mdg4),CTCF,CBP,
CHR2L	13814008	13814508	Sos	Su(var)3-9,HDAC1,ttk,chinmo,HDAC3,br,h,Dfd,dl,Hr39,fru,
CHR2L	13829541	13830041	Arpc1	HDAC1,HDAC4a,Trl,CBP,HDAC3,sens,Tbp,dl,Med,Sin3A,HDAC6,
CHR2L	13878964	13879464	cenG1A	mod(mdg4),HDAC1,GATAe,ttk,HDAC4a,Trl,twi,dl,Med,disco,HDAC6,da,
CHR2L	13903858	13904358	Smg5	Hr78,cnc,HDAC1,N,ttk,bcd,dm,CTCF,HDAC4a,trem,HDAC3,twi,Trl,Tbp,dl,slp1,hb,Med,Sin3A,HDAC11,HDAC6,prd,cad,da,E(z),
CHR2L	13955954	13956454	nimA	pan,Dll,usp,
CHR2L	1399342	1399842	lea	CG8478,bin,twi,Dll,dl,
CHR2L	14050161	14050661	nimC4	Trl,
CHR2L	14116095	14116595	CG31769	GATAe,Trl,dl,
CHR2L	1413236	1413736	lea	bap,bin,twi,Dll,dl,jumu,sens,disco,da,
CHR2L	14140990	14141490	CG17341	su(Hw),
CHR2L	1420124	1420624	lea	mod(mdg4),HDAC11,Su(var)3-9,HDAC1,Mef2,bcd,CG8478,bin,dm,HDAC4a,z,twi,h,Tbp,dl,tin,Med,sens,HDAC3,fru,HDAC6,prd,tll,da,
CHR2L	14203832	14204332	CG43333	CBP,
CHR2L	14222648	14223148	smi35A	-
CHR2L	14302866	14303366	wb	-
CHR2L	14348504	14349004	mTTF	HDAC1,su(Hw),HDAC4a,HDAC3,dl,Med,Sin3A,Ubx,HDAC6,en,
CHR2L	14354840	14355340	l(2)34Fd	CG8478,mod(mdg4),lola,Sin3A,HDAC1,CTCF,dm,HDAC4a,trem,HDAC3,pan,Trl,twi,sens,Tbp,dl,Med,HDAC6,HDAC11,da,E(z),
CHR2L	14359150	14359650	Pgant35A	Su(var)3-9,HDAC1,dm,HDAC3,HDAC4a,dl,Sin3A,HDAC11,Ubx,HDAC6,CTCF,
CHR2L	14376812	14377312	ppk	pan,eve,hth,
CHR2L	14409460	14409960	elB	HDAC11,Su(var)3-9,HDAC1,Mef2,sbb,Su(H),gro,trem,Trl,CBP,yki,bon,Dll,dl,insv,kni,
CHR2L	14434312	14434812	Cpr35B	bap,bcd,bin,gro,Mef2,twi,hth,HDAC1,dl,slp1,tin,hb,Med,sens,disco,HDAC6,cad,D,da,
CHR2L	14461402	14461902	CG15283	eve,hth,D,pan,twi,HDAC4a,dl,gro,HDAC11,da,Mef2,HDAC1,
CHR2L	14513286	14513786	tRNA:G3:35Ba	bap,bin,hth,Trl,HDAC4a,HDAC1,dl,gro,tin,Med,sens,twi,disco,HDAC11,en,da,Mef2,cnc,
CHR2L	14516195	14516695	tRNA:G3:35Ba	hth,gro,twi,tin,
CHR2L	14527678	14528178	tRNA:G3:35Bd	bap,bin,gro,hth,pan,tin,CG16778,fru,Mef2,cnc,
CHR2L	14546868	14547368	CG4218	bap,Su(var)3-9,Mef2,bin,gro,eve,hth,HDAC4a,tin,HDAC11,Ubx,twi,en,HDAC1,
CHR2L	14552475	14552975	CG4218	HDAC1,cad,hth,chinmo,gro,Dll,HDAC4a,dl,HDAC11,prd,da,
CHR2L	14664287	14664787	osp	-
CHR2L	1466669	1467169	CG43402	HDAC11,
CHR2L	14743894	14744394	CG42681	cnc,
CHR2L	14772752	14773252	CG4650	cad,
CHR2L	14787612	14788112	CG18636	-
CHR2L	14921608	14922108	CG3491	-
CHR2L	14949164	14949664	CG42313	-
CHR2L	15039128	15039628	Su(H)	cnc,Sin3A,HDAC1,GATAe,bcd,HP1b,hkb,gro,dm,CTCF,trem,z,Trl,twi,Tbp,HDAC4a,dl,slp1,hb,bab1,Med,jumu,Ubx,HDAC6,cad,HDAC11,D,da,
CHR2L	15084576	15085076	CG15270	-
CHR2L	151082	151582	CG42399	-
CHR2L	15174683	15175183	CG4168	-
CHR2L	15384542	15385042	CG15258	sna,Su(var)3-9,dl,Med,
CHR2L	15425969	15426469	wor	gro,Trl,yki,bon,Dll,dl,da,
CHR2L	15428720	15429220	wor	gro,da,
CHR2L	15431463	15431963	CG4161	Mef2,da,
CHR2L	15439414	15439914	CG4161	CTCF,dl,bab1,
CHR2L	15445635	15446135	CG4161	Trl,Mef2,
CHR2L	15458265	15458765	sna	gro,da,
CHR2L	1548512	1549012	haf	-
CHR2L	155036	155536	CG3709	HDAC11,HDAC1,GATAe,hkb,CTCF,CBP,twi,HDAC3,Tbp,HDAC4a,dl,Med,Sin3A,Ubx,HDAC6,
CHR2L	15577096	15577596	kek3	su(Hw),CBP,
CHR2L	15586235	15586735	CG15255	-
CHR2L	15726903	15727403	CycE	-
CHR2L	15749313	15749813	CycE	HDAC3,HDAC6,
CHR2L	15750541	15751041	l(2)35Di	Su(var)3-9,HDAC1,su(Hw),dm,Pcl,HDAC3,pan,twi,h,Tbp,HDAC4a,dl,Med,Sin3A,HDAC6,HDAC11,
CHR2L	15752187	15752687	l(2)35Df	Su(var)3-9,HDAC1,HP1b,dm,HDAC3,twi,sens,Tbp,dl,HDAC6,E(z),
CHR2L	15761224	15761724	Gli	sna,HDAC1,Kr,CG8478,twi,HDAC4a,dl,EcR,hb,Med,da,
CHR2L	15773052	15773552	CG31826	pan,CBP,HDAC3,HDAC1,HDAC6,
CHR2L	15781803	15782303	CG18109	CTCF,
CHR2L	15800460	15800960	CG42876	-
CHR2L	1581313	1581813	CG10869	-
CHR2L	15826756	15827256	CG18518	-
CHR2L	15831176	15831676	CG18518	su(Hw),
CHR2L	15913946	15914446	CG13244	Su(var)3-9,Stat92E,cad,eve,Trl,usp,EcR,Mef2,HDAC1,
CHR2L	15926656	15927156	CG4793	slp1,sens,
CHR2L	16014410	16014910	CG31820	-
CHR2L	160567	161067	spen	CG8478,HDAC11,Hr78,HDAC1,N,Mef2,Kr,bin,hth,gro,zfh1,HDAC4a,HDAC3,Trl,CBP,twi,Tbp,dl,tin,hb,Lpt,Med,disco,EcR,cad,da,
CHR2L	16071840	16072340	beat-Ia	-
CHR2L	16153905	16154405	Ca-alpha1D	-
CHR2L	16160537	16161037	Ca-alpha1D	-
CHR2L	161662	162162	spen	CG8478,Hr78,HDAC11,HDAC1,kn,N,Mef2,Kr,bin,D,gro,zfh1,HDAC4a,z,HDAC3,Trl,twi,hth,Stat92E,Dll,Tbp,dl,cad,slp1,tin,hb,Lpt,Med,disco,prd,Eip74EF,Abd-B,da,E(z),
CHR2L	16253949	16254449	PRL-1	twi,Mef2,
CHR2L	16269179	16269679	CG4935	mod(mdg4),Su(var)3-9,HDAC1,kn,Mef2,CG8478,bin,D,dm,gro,HDAC4a,z,Trl,yki,twi,Dll,Tbp,dl,Su(H),tin,Med,Sin3A,EcR,da,E(z),
CHR2L	16273446	16273946	CG4935	cnc,CTCF,Trl,bin,dl,
CHR2L	16284343	16284843	crp	CG8478,HDAC1,N,Kr,dm,gro,z,Trl,bin,twi,yki,Dll,dl,cad,Su(H),slp1,hb,tin,Med,EcR,Ubx,Mef2,da,E(z),
CHR2L	16286687	16287187	crp	Hr78,mod(mdg4),HDAC11,HDAC1,kn,N,Mef2,CG8478,bin,eve,CTCF,gro,zfh1,HDAC4a,z,tll,pan,Trl,twi,yki,HDAC3,Tbp,psq,dl,Su(H),slp1,tin,hb,Lpt,Med,jumu,Sin3A,disco,Ubx,prd,cad,Abd-B,da,E(z),
CHR2L	16315064	16315564	fzy	cad,twi,dl,EcR,
CHR2L	16320035	16320535	cact	cad,twi,dl,Med,sens,Mef2,da,
CHR2L	16328786	16329286	mRpL4	HDAC11,Su(var)3-9,HDAC1,bcd,dm,HDAC4a,trem,HDAC3,twi,Tbp,dl,hb,Med,Sin3A,HDAC6,da,CTCF,
CHR2L	16350987	16351487	chif	HDAC1,kn,N,CTCF,eve,z,usp,Trl,CBP,yki,twi,Stat92E,HDAC3,Dfd,Tbp,psq,dl,hb,Lpt,Med,sens,Sin3A,HDAC11,HDAC6,da,E(z),
CHR2L	16351535	16352035	chif	Hr78,HDAC1,N,CG8478,psq,eve,z,usp,pan,Trl,CBP,twi,Stat92E,HDAC3,Tbp,dl,hb,tin,Med,sens,HDAC11,HDAC6,
CHR2L	16378833	16379333	jhamt	-
CHR2L	16401974	16402474	snoRNA:Me28S-A2958	-
CHR2L	16411308	16411808	snoRNA:Me28S-A2958	dl,
CHR2L	16420732	16421232	snoRNA:Me28S-A2958	GATAe,
CHR2L	16422750	16423250	snoRNA:Me28S-A2958	CG8478,Hr78,HDAC1,N,CTCF,gro,HDAC4a,Dfd,tll,Trl,yki,twi,Dll,Tbp,dl,Su(H),Med,Mef2,Abd-B,E(z),
CHR2L	16445428	16445928	Idgf1	GATAe,
CHR2L	1645130	1645630	chinmo	dl,
CHR2L	16459376	16459876	Idgf3	sbb,disco,su(Hw),cnc,
CHR2L	1648460	1648960	chinmo	CG8478,N,eve,Trl,dl,Eip74EF,HDAC1,lola,
CHR2L	16491248	16491748	Tpr2	lola,Sin3A,HDAC1,GATAe,CTCF,CG8478,mod(mdg4),dm,ttk,zfh1,HDAC4a,trem,tll,pan,yki,twi,Tbp,dl,cad,bab1,Lpt,Med,HDAC11,Ubx,prd,HDAC6,Eip74EF,
CHR2L	1651685	1652185	chinmo	HDAC1,dl,
CHR2L	16520377	16520877	CG5953	CG8478,bap,cnc,Su(var)3-9,gsb-n,HDAC1,Mef2,eve,gro,HDAC4a,z,Trl,CBP,yki,twi,dl,Su(H),HDAC6,HDAC11,da,
CHR2L	16522946	16523446	CG5953	cnc,Trl,dl,
CHR2L	16524884	16525384	snoRNA:Me28S-C1237	cnc,gro,Trl,HDAC3,
CHR2L	16525871	16526371	snoRNA:Me28S-C1237	cnc,Su(var)3-9,N,Mef2,CG8478,Su(H),gro,Trl,CBP,yki,bon,Stat92E,Dll,dl,EcR,insv,
CHR2L	16528395	16528895	snoRNA:Me28S-C1237	cnc,ttk,Trl,
CHR2L	16532771	16533271	CG5953	cnc,HDAC11,gsb-n,HDAC1,kn,Mef2,bin,eve,gro,HDAC4a,z,usp,Trl,yki,bon,twi,hth,Stat92E,h,Dll,Tbp,psq,dl,EcR,Su(H),Lpt,Med,da,E(z),
CHR2L	16534186	16534686	CG5953	lola,cnc,Mef2,psq,bin,gro,z,Trl,yki,CG8478,dl,Su(H),usp,Eip74EF,
CHR2L	16536582	16537082	CG5953	HDAC1,bin,eve,gro,HDAC4a,Trl,dl,slp1,Med,cad,HDAC11,
CHR2L	16538875	16539375	CG31816	su(Hw),
CHR2L	16587802	16588302	CG42389	sna,Su(var)3-9,Mef2,mod(mdg4),eve,dm,gro,HDAC4a,z,Trl,usp,CBP,yki,bon,twi,HDAC3,Tbp,dl,EcR,cad,Su(H),hb,Lpt,Med,HDAC11,HDAC1,
CHR2L	16601446	16601946	CG42389	Hr78,mod(mdg4),Su(var)3-9,gsb-n,Stat92E,HDAC1,N,eve,gro,z,usp,pan,Trl,Mef2,twi,yki,Dll,Tbp,dl,cad,Su(H),tin,hb,bab1,Lpt,Med,HDAC11,Abd-B,da,
CHR2L	16612455	16612955	CG4631	Hr39,
CHR2L	1661402	1661902	chinmo	-
CHR2L	166357	166857	spen	HDAC1,GATAe,Mef2,bin,Trl,CG8478,twi,Tbp,dl,slp1,hb,Lpt,Med,disco,D,da,
CHR2L	16637300	16637800	CR44151	Trl,
CHR2L	16640866	16641366	CR44151	-
CHR2L	1667172	1667672	chinmo	CG8478,Trl,dl,
CHR2L	16676890	16677390	her	HDAC1,dm,HDAC4a,trem,Tbp,dl,slp1,Med,CTCF,
CHR2L	1668124	1668624	chinmo	ttk,CG8478,eve,dl,hb,
CHR2L	16683844	16684344	grp	mod(mdg4),eve,usp,Trl,dl,brm,HDAC11,HDAC1,
CHR2L	16686318	16686818	grp	gro,Trl,twi,dl,cad,hb,
CHR2L	16760909	16761409	CG13278	Mef2,bin,
CHR2L	16775782	16776282	Mhc	-
CHR2L	1678934	1679434	chinmo	-
CHR2L	16818354	16818854	mdy	cnc,HDAC1,GATAe,eve,Trl,usp,HDAC11,
CHR2L	1686914	1687414	cpb	sens,pan,
CHR2L	16879225	16879725	CG34313	HDAC1,GATAe,CTCF,HDAC4a,trem,Trl,HDAC3,Med,Sin3A,disco,Ubx,HDAC6,
CHR2L	16881887	16882387	CG34313	cnc,Trl,HDAC3,
CHR2L	16930850	16931350	CG43053	-
CHR2L	17008682	17009182	CG6304	-
CHR2L	17026242	17026742	CG6304	-
CHR2L	17041340	17041840	CR43802	-
CHR2L	17083704	17084204	CR43819	-
CHR2L	1708814	1709314	CG17660	ttk,HDAC3,pan,
CHR2L	1710092	1710592	CG17660	sna,HDAC1,Kr,ttk,HDAC4a,HDAC3,twi,Tbp,dl,Med,Sin3A,HDAC6,da,
CHR2L	17110498	17110998	CG31784	-
CHR2L	17224643	17225143	CG15139	sens,
CHR2L	17244508	17245008	CG15139	da,
CHR2L	17254826	17255326	beat-IIIc	sbb,bin,Mef2,
CHR2L	17258520	17259020	beat-IIIc	bap,hth,tin,
CHR2L	17277643	17278143	CG15140	-
CHR2L	17378159	17378659	Lrch	bap,gro,eve,zfh1,bin,Trl,twi,dl,tin,da,HDAC1,
CHR2L	17449478	17449978	dl	cnc,eve,Trl,dl,pan,
CHR2L	17450345	17450845	dl	cnc,gro,CTCF,Trl,dl,kni,
CHR2L	17500881	17501381	CG6412	HDAC11,Su(var)3-9,HDAC1,CTCF,mod(mdg4),dm,HDAC4a,twi,Tbp,dl,bab1,Med,Sin3A,HDAC6,da,
CHR2L	17515723	17516223	CG15143	twi,
CHR2L	1751839	1752339	CG17712	HDAC1,dm,twi,HDAC3,HDAC4a,dl,slp1,hb,Sin3A,HDAC6,HDAC11,da,
CHR2L	17558388	17558888	CG7094	z,Trl,su(Hw),
CHR2L	17606809	17607309	Sytalpha	-
CHR2L	17679197	17679697	CG43231	-
CHR2L	17723794	17724294	CG43231	-
CHR2L	17732094	17732594	CadN	su(Hw),
CHR2L	17766495	17766995	CadN	bin,
CHR2L	17773062	17773562	CadN	-
CHR2L	17779444	17779944	CadN	hth,Trl,D,HDAC1,
CHR2L	1781039	1781539	Gr22e	su(Hw),
CHR2L	1787775	1788275	Gr22d	-
CHR2L	17892605	17893105	CR43420	CBP,
CHR2L	17946462	17946962	CG5674	su(Hw),
CHR2L	17971743	17972243	CG5674	E(z),
CHR2L	18016937	18017437	rdo	sbb,cad,
CHR2L	18068067	18068567	Arr1	hkb,CTCF,
CHR2L	18080014	18080514	ninaD	-
CHR2L	18112301	18112801	CG15152	-
CHR2L	18121352	18121852	CG5758	eve,HDAC4a,HDAC11,
CHR2L	18122657	18123157	CG5758	EcR,
CHR2L	18140815	18141315	kel	sna,ttk,lola,Dfd,HDAC3,Trl,twi,h,HDAC4a,dl,Hr39,HDAC11,da,E(z),
CHR2L	18144956	18145456	kel	Stat92E,HDAC1,shn,eve,HDAC4a,pan,twi,hth,HDAC3,dl,gro,Lpt,Med,HDAC11,cad,D,da,
CHR2L	18146720	18147220	Socs36E	twi,Stat92E,dl,Med,da,
CHR2L	18151261	18151761	Socs36E	CG8478,Hr78,Su(H),Su(var)3-9,Stat92E,HDAC1,N,ttk,hth,gro,Dfd,z,sc,usp,Trl,CBP,twi,yki,h,Dll,Tbp,dl,tin,Lpt,Med,Mef2,HDAC11,Eip74EF,Abd-B,da,lola,
CHR2L	18252223	18252723	CG43406	-
CHR2L	18332305	18332805	Fas3	da,
CHR2L	18356489	18356989	Acp36DE	twi,dl,sens,da,
CHR2L	18381589	18382089	CG34171	-
CHR2L	18387791	18388291	CG34171	-
CHR2L	18444868	18445368	RpS26	Trl,HDAC3,dl,sens,
CHR2L	18448655	18449155	ncm	sna,Su(var)3-9,HDAC1,dm,HDAC3,twi,Tbp,dl,HDAC11,hb,Med,Sin3A,Ubx,HDAC6,cad,da,E(z),
CHR2L	18454343	18454843	bsf	mod(mdg4),HDAC11,Su(var)3-9,HDAC1,CTCF,dm,HDAC4a,HDAC3,Trl,Tbp,dl,Sin3A,HDAC6,E(z),
CHR2L	18457346	18457846	CR43344	cnc,
CHR2L	18478975	18479475	CG10283	pan,
CHR2L	18482944	18483444	CG10283	eve,HDAC4a,bin,dl,Med,HDAC3,da,
CHR2L	18528327	18528827	CG10211	-
CHR2L	18556651	18557151	Pde11	-
CHR2L	18562834	18563334	Pde11	mod(mdg4),HDAC1,Mef2,psq,bin,gro,HDAC4a,z,Trl,dl,
CHR2L	18577018	18577518	Pde11	su(Hw),
CHR2L	18619682	18620182	MESR3	dl,Mef2,
CHR2L	18627074	18627574	MESR3	eve,Trl,gro,
CHR2L	18655920	18656420	Cyp310a1	CTCF,
CHR2L	18681811	18682311	tos	HDAC11,HDAC1,HDAC4a,Trl,HDAC3,dl,HDAC6,
CHR2L	18688483	18688983	msl-1	Sin3A,HDAC1,GATAe,N,CTCF,HP1b,dm,trem,HDAC3,Tbp,HDAC4a,dl,Med,jumu,HDAC11,HDAC6,D,
CHR2L	18693873	18694373	CG10383	HDAC1,eve,ttk,HDAC4a,HDAC3,dl,pan,HDAC11,
CHR2L	18695359	18695859	CG10338	HDAC11,Sin3A,HDAC1,su(Hw),mod(mdg4),dm,HDAC4a,twi,Tbp,dl,tin,Med,Ubx,HDAC6,da,Mef2,
CHR2L	18799539	18800039	CG43814	bin,HDAC4a,twi,Mef2,
CHR2L	18839306	18839806	CG10600	CG8478,Hr78,mod(mdg4),Su(var)3-9,HDAC1,N,CTCF,dm,zfh1,HDAC4a,z,HDAC3,Trl,sc,twi,Tbp,dl,slp1,bab1,Med,Sin3A,HDAC6,Abd-B,da,E(z),lola,
CHR2L	18866437	18866937	mRpL13	dl,Hr39,
CHR2L	1890229	1890729	CG7337	-
CHR2L	18943759	18944259	ssp3	cnc,HDAC11,HDAC1,CG8478,hkb,CTCF,HDAC4a,trem,z,Trl,twi,dl,tin,Med,jumu,Sin3A,disco,Mef2,Ubx,HDAC6,da,kni,E(z),
CHR2L	18947208	18947708	CG42848	CG8478,Su(H),Su(var)3-9,gsb-n,HDAC1,Mef2,gro,HDAC4a,tll,twi,Stat92E,h,Tbp,dl,Lpt,Med,ftz,da,
CHR2L	18956930	18957430	CG10623	slp1,
CHR2L	18984176	18984676	CG10641	-
CHR2L	19003374	19003874	CG31793	HDAC1,twi,dl,sens,E(z),
CHR2L	19035051	19035551	CG31800	HDAC1,Trl,twi,HDAC3,dl,Med,Mef2,Ubx,HDAC6,cad,
CHR2L	19053895	19054395	CG10492	gsb-n,HDAC1,bcd,mod(mdg4),dm,CTCF,Pcl,HDAC4a,HDAC3,Trl,CBP,twi,Tbp,dl,Med,Sin3A,Ubx,fru,HDAC6,Snr1,HDAC11,da,kni,
CHR2L	1906558	1907058	CG7337	EcR,pan,
CHR2L	19135110	19135610	l(2)37Cg	CG8478,Hr78,HDAC1,Mef2,su(Hw),hkb,bin,gro,z,Trl,twi,yki,bon,Dll,Tbp,dl,cad,slp1,tin,hb,Lpt,Med,Ubx,D,da,E(z),
CHR2L	19140424	19140924	l(2)37Cg	sna,Trl,CBP,twi,dl,Med,sens,prd,cad,HDAC11,da,
CHR2L	19146915	19147415	brat	Trl,twi,dl,hb,
CHR2L	19154592	19155092	brat	sna,CG8478,hth,tll,sc,pan,Trl,CBP,twi,Tbp,dl,cad,hb,Lpt,Med,disco,EcR,prd,en,tin,da,Mef2,E(z),
CHR2L	19156004	19156504	brat	sna,bap,usp,pan,twi,dl,cad,slp1,tin,hb,Med,EcR,tll,da,Mef2,E(z),
CHR2L	19158068	19158568	brat	bap,HDAC1,Mef2,bcd,CG8478,bin,gro,HDAC4a,z,pan,Trl,usp,twi,yki,h,Dll,Tbp,dl,tin,hb,Lpt,Med,EcR,HDAC3,prd,D,da,E(z),
CHR2L	19161619	19162119	brat	sna,Su(var)3-9,HDAC1,Kr,CG8478,D,gro,z,pan,Trl,twi,HDAC3,dl,hb,tin,Lpt,Med,EcR,Mef2,prd,cad,HDAC11,da,
CHR2L	19190003	19190503	drl	mod(mdg4),Su(var)3-9,HDAC1,hkb,bin,dm,HDAC4a,HDAC3,Tbp,dl,Med,jumu,sens,disco,HDAC6,prd,
CHR2L	19223618	19224118	drl	twi,da,
CHR2L	19263013	19263513	CG31797	-
CHR2L	1930778	1931278	CG7337	-
CHR2L	19347338	19347838	dnt	-
CHR2L	19361679	19362179	dnt	cnc,HDAC1,psq,gro,Trl,bin,CBP,twi,Stat92E,dl,Su(H),hb,HDAC11,
CHR2L	19362710	19363210	dnt	lola,Su(var)3-9,HDAC1,Kr,cad,psq,dm,CTCF,gro,HDAC3,Trl,bin,yki,bon,twi,Tbp,dl,HDAC11,Su(H),hb,Med,Mef2,HDAC6,da,
CHR2L	1938693	1939193	tRNA:G3:22BCa	z,Mef2,CBP,Trl,
CHR2L	1939205	1939705	tRNA:G3:22BCa	z,CBP,HDAC3,
CHR2L	19414122	19414622	Pax	CTCF,gro,z,Trl,twi,Dll,dl,sens,da,E(z),
CHR2L	19424992	19425492	CG13085	HDAC1,CTCF,Trl,dl,cad,HDAC11,
CHR2L	19426386	19426886	Pax	mod(mdg4),HDAC1,CTCF,hkb,Trl,Mef2,Dll,h,dl,cad,Lpt,jumu,Sin3A,disco,Ubx,HDAC6,D,en,E(z),
CHR2L	19454109	19454609	CG10026	sbb,CTCF,HDAC4a,trem,dl,EcR,Med,sens,HDAC11,
CHR2L	19467947	19468447	CR43839	-
CHR2L	19473593	19474093	CR43839	Trl,
CHR2L	19508183	19508683	CG10188	sna,CG8478,Su(var)3-9,HDAC1,N,CTCF,HDAC4a,HDAC3,CBP,twi,Tbp,dl,Med,sens,Sin3A,HDAC6,da,
CHR2L	19542477	19542977	ref(2)P	cnc,HDAC1,GATAe,CTCF,mod(mdg4),dm,trem,Trl,twi,Tbp,HDAC4a,dl,Med,Sin3A,disco,HDAC6,D,
CHR2L	19546954	19547454	CG10337	cnc,psq,eve,Trl,twi,dl,HDAC11,
CHR2L	19548120	19548620	Tep4	cnc,eve,zfh1,Trl,dl,Med,
CHR2L	19570167	19570667	spi	CTCF,Trl,CBP,HDAC3,dl,
CHR2L	19571928	19572428	spi	CG8478,Hr78,mod(mdg4),gsb-n,Stat92E,HDAC1,GATAe,kn,N,hkb,pan,gro,zfh1,HDAC4a,Dfd,Trl,usp,CBP,yki,sc,twi,Dll,Tbp,dl,EcR,cad,Su(H),hb,Lpt,Med,jumu,Sin3A,disco,HDAC3,Eip74EF,D,da,Mef2,lola,
CHR2L	19575606	19576106	spi	sna,CG8478,Hr78,bap,HDAC11,Su(var)3-9,Stat92E,HDAC1,N,Mef2,mod(mdg4),bin,CTCF,gro,zfh1,HDAC4a,trem,z,tll,pan,Trl,br,usp,twi,yki,hth,h,Tbp,dl,Su(H),slp1,tin,hb,Lpt,Med,jumu,EcR,HDAC3,HDAC6,prd,Eip74EF,Abd-B,da,E(z),
CHR2L	1965021	1965521	tRNA:CR31942	sens,
CHR2L	19665003	19665503	scw	-
CHR2L	1968031	1968531	erm	-
CHR2L	19758506	19759006	CG10463	HDAC11,Sin3A,Su(var)3-9,HDAC1,mod(mdg4),eve,dm,HDAC4a,trem,tll,Trl,twi,HDAC3,Tbp,dl,Med,Ubx,HDAC6,Mef2,D,
CHR2L	19795430	19795930	fs(2)ltoPP43	Su(var)3-9,HDAC1,CTCF,dm,HDAC4a,usp,CBP,Dll,HDAC3,Tbp,dl,EcR,Med,Sin3A,HDAC11,Ubx,HDAC6,cad,
CHR2L	19822510	19823010	sick	su(Hw),sens,
CHR2L	19852359	19852859	sick	-
CHR2L	19858646	19859146	sick	-
CHR2L	1986283	1986783	Got2	ttk,gro,CTCF,
CHR2L	19935643	19936143	sick	cnc,HDAC1,GATAe,hkb,mod(mdg4),Trl,twi,hth,dl,Med,jumu,disco,da,
CHR2L	19983275	19983775	CR43620	-
CHR2L	20017826	20018326	CG43861	-
CHR2L	20075297	20075797	pr	mod(mdg4),Sin3A,HDAC1,dm,HDAC4a,trem,tll,twi,Tbp,dl,Med,HDAC11,HDAC6,da,
CHR2L	20159367	20159867	CG10651	-
CHR2L	20197851	20198351	CG40341	su(Hw),
CHR2L	20205060	20205560	CG40341	Trl,twi,tin,CTCF,
CHR2L	20255049	20255549	CR40465	su(Hw),
CHR2L	20310270	20310770	spir	gsb-n,HDAC1,Mef2,bin,zfh1,HDAC4a,Trl,br,twi,Tbp,dl,slp1,hb,Med,
CHR2L	2037532	2038032	Su(dx)	CG8478,HDAC1,N,CTCF,mod(mdg4),dm,gro,HDAC4a,trem,z,Trl,twi,Tbp,dl,Med,jumu,Sin3A,disco,HDAC6,Abd-B,D,da,
CHR2L	20414442	20414942	CG10949	CTCF,h,HDAC3,Lpt,
CHR2L	20417166	20417666	Arpc2	CG8478,Hr78,HDAC1,GATAe,N,dm,z,Trl,yki,sc,twi,Dll,Tbp,dl,Su(H),Med,Sin3A,disco,Mef2,Abd-B,E(z),
CHR2L	20478581	20479081	CG43234	pan,
CHR2L	20486495	20486995	CG34007	sna,Mef2,bin,CTCF,twi,Tbp,dl,tin,hb,Lpt,Med,da,
CHR2L	20575966	20576466	CG31677	CTCF,Trl,
CHR2L	20585511	20586011	CG31677	-
CHR2L	20593499	20593999	CG31677	lola,Hr39,
CHR2L	20635153	20635653	CG17472	-
CHR2L	20747274	20747774	CG9319	-
CHR2L	20780429	20780929	cad	HDAC4a,dl,
CHR2L	20792706	20793206	vari	Trl,HDAC3,
CHR2L	20806044	20806544	CG9328	bin,pan,eve,zfh1,HDAC11,
CHR2L	20836051	20836551	Oseg5	-
CHR2L	20864329	20864829	CG9338	gsb-n,pan,eve,z,Trl,HDAC11,
CHR2L	20880037	20880537	sky	Trl,
CHR2L	20909318	20909818	sky	-
CHR2L	20911178	20911678	sky	Trl,
CHR2L	20953602	20954102	CG42238	-
CHR2L	20970739	20971239	CG42238	hth,
CHR2L	21030203	21030703	CG42238	hb,
CHR2L	21032289	21032789	CG42238	mod(mdg4),dl,
CHR2L	21041118	21041618	CG42238	twi,dl,cad,disco,
CHR2L	21041767	21042267	CG42238	-
CHR2L	21048867	21049367	CG42238	cad,
CHR2L	21218564	21219064	CG8679	HDAC1,CTCF,HDAC4a,trem,Trl,twi,dl,Sin3A,HDAC6,D,
CHR2L	21221590	21222090	CG8677	HDAC1,gro,HDAC4a,trem,HDAC3,Trl,CTCF,yki,twi,Dll,dl,Med,Sin3A,Ubx,HDAC6,HDAC11,da,
CHR2L	21237045	21237545	Hr39	sna,CG8478,Hr78,mod(mdg4),Su(var)3-9,HDAC1,N,Mef2,CTCF,bin,HDAC4a,trem,z,Trl,usp,twi,yki,h,Tbp,psq,dl,EcR,tin,hb,bab1,Lpt,Med,Sin3A,Ubx,fru,HDAC6,Eip74EF,HDAC11,D,da,E(z),
CHR2L	21250403	21250903	l(2)k14505	mod(mdg4),Su(var)3-9,HDAC1,N,Mef2,CTCF,CG8478,psq,gro,HDAC4a,Trl,usp,CBP,yki,dl,Su(H),Lpt,EcR,Eip74EF,twi,
CHR2L	21310948	21311448	crc	cnc,HDAC11,HDAC1,N,dm,CTCF,trem,twi,HDAC3,Tbp,dl,Med,Sin3A,Ubx,HDAC6,da,
CHR2L	21347434	21347934	Tsp39D	-
CHR2L	21542719	21543219	His-Psi:CR31614	-
CHR2L	21553568	21554068	His-Psi:CR31614	-
CHR2L	21556880	21557380	His-Psi:CR31614	-
CHR2L	2161147	2161647	aop	Su(var)3-9,gsb-n,HDAC1,Mef2,h,gro,HDAC4a,Trl,bin,CG8478,bon,twi,Tbp,dl,Su(H),bab1,Lpt,Med,disco,HDAC11,prd,D,da,
CHR2L	21629081	21629581	Df31	CG8478,Hr78,HDAC11,Su(var)3-9,gsb-n,HDAC1,N,bcd,CTCF,HDAC4a,z,pan,Trl,br,twi,sc,h,HDAC3,Tbp,dl,hb,tin,Lpt,Med,jumu,Sin3A,Mef2,Ubx,HDAC6,prd,Abd-B,da,lola,
CHR2L	21653057	21653557	CG43144	dl,
CHR2L	21656051	21656551	CG43144	-
CHR2L	21656900	21657400	CG43144	HP1b,Kr,Trl,dl,pan,Ubx,CTCF,HDAC11,
CHR2L	21658562	21659062	Cul-2	lola,Hr78,HDAC1,N,HP1b,trem,Dfd,Trl,HDAC3,HDAC4a,dl,Med,Sin3A,HDAC11,Ubx,HDAC6,Snr1,Eip74EF,CTCF,
CHR2L	2165871	2166371	aop	sna,bcd,Trl,twi,HDAC4a,HDAC1,dl,tin,hb,Med,Mef2,prd,tll,cad,HDAC11,da,
CHR2L	2175185	2175685	aop	N,Dfd,CG8478,gro,zfh1,Trl,yki,Tbp,psq,dl,Med,Eip74EF,Mef2,E(z),
CHR2L	21753447	21753947	step	sna,mod(mdg4),eve,gro,Trl,twi,dl,cad,hb,Med,
CHR2L	2176307	2176807	aop	gro,HDAC1,psq,dl,Med,
CHR2L	21819520	21820020	tsh	bap,bin,hth,twi,tin,sens,
CHR2L	21828195	21828695	tsh	CG8478,mod(mdg4),Su(var)3-9,HDAC1,kn,N,Mef2,cad,hkb,hth,D,gro,HDAC4a,z,Trl,yki,twi,h,Dll,Tbp,dl,Su(H),hb,Med,sens,disco,prd,Abd-B,da,
CHR2L	21847067	21847567	tsh	sna,HDAC1,GATAe,hth,HDAC4a,Trl,twi,dl,Med,sens,EcR,prd,HDAC11,D,da,Mef2,
CHR2L	21887566	21888066	CR43762	Mef2,hth,
CHR2L	21899232	21899732	CG11629	mod(mdg4),HDAC1,GATAe,N,CG8478,bin,dm,gro,HDAC4a,Dfd,z,Trl,twi,yki,hth,Dll,Tbp,dl,Su(H),sens,Mef2,prd,Eip74EF,Abd-B,da,E(z),lola,
CHR2L	21961407	21961907	CG2528	-
CHR2L	21964120	21964620	CG2528	-
CHR2L	21997357	21997857	CG2528	-
CHR2L	22024157	22024657	tio	CG8478,bap,Mef2,CTCF,mod(mdg4),hth,D,dm,gro,HDAC4a,Dfd,z,tll,Trl,twi,yki,Stat92E,Dll,Tbp,dl,cad,Su(H),tin,Med,da,
CHR2L	22073437	22073937	CG31702	cad,
CHR2L	22169576	22170076	CG1832	Hr78,N,HP1b,trem,Tbp,HDAC4a,dl,hb,Med,Snr1,Eip74EF,HDAC11,lola,
CHR2L	2217005	2217505	CG15386	HDAC1,bin,HDAC4a,HDAC3,twi,dl,Med,Sin3A,Ubx,HDAC6,da,
CHR2L	22173825	22174325	CG3635	HP1b,da,
CHR2L	22179718	22180218	CG3635	HP1b,mod(mdg4),CTCF,dl,
CHR2L	22191125	22191625	Ir40a	HP1b,
CHR2L	22216095	22216595	Ir40a	HP1b,
CHR2L	22219254	22219754	Ir40a	-
CHR2L	22261021	22261521	Tif-IA	ttk,HP1b,dl,
CHR2L	22265495	22265995	Tif-IA	-
CHR2L	2226683	2227183	l(2)s5379	lola,cnc,Su(var)3-9,HDAC1,kn,ttk,dm,CTCF,gro,HDAC4a,z,Trl,Mef2,HDAC3,Tbp,dl,Med,sens,Sin3A,brm,Ubx,HDAC6,HDAC11,
CHR2L	22276011	22276511	Tif-IA	HP1b,
CHR2L	22283360	22283860	CG17018	HP1b,
CHR2L	22289742	22290242	CG17018	HP1b,
CHR2L	22353972	22354472	CG17018	HP1b,CTCF,
CHR2L	2236391	2236891	gho	HDAC1,ttk,HDAC4a,trem,HDAC3,dl,Sin3A,HDAC6,HDAC11,E(z),
CHR2L	22377054	22377554	CG17018	-
CHR2L	22392101	22392601	snoRNA:Psi28S-2996	HP1b,
CHR2L	22394515	22395015	snoRNA:Psi28S-2996	HP1b,
CHR2L	22402400	22402900	snoRNA:Psi28S-2996	HP1b,
CHR2L	22408334	22408834	snoRNA:Psi28S-2996	CBP,
CHR2L	22409737	22410237	snoRNA:Psi28S-2996	CBP,
CHR2L	22411128	22411628	snoRNA:Psi28S-2996	-
CHR2L	22412557	22413057	snoRNA:Psi28S-2996	-
CHR2L	22413921	22414421	snoRNA:Psi28S-2996	CBP,
CHR2L	22415056	22415556	snoRNA:Psi28S-2996	CBP,
CHR2L	22424791	22425291	snoRNA:Psi28S-2996	HP1b,CTCF,
CHR2L	22447284	22447784	CG17493	HP1b,
CHR2L	2244870	2245370	CR42859	-
CHR2L	22532279	22532779	CG17494	HP1b,
CHR2L	22533313	22533813	CG17494	HP1b,
CHR2L	22539810	22540310	CG17494	HP1b,
CHR2L	22546453	22546953	CG17494	-
CHR2L	22552048	22552548	CG17494	-
CHR2L	22572477	22572977	CR43927	-
CHR2L	22587820	22588320	CR43927	HP1b,
CHR2L	22634888	22635388	CR43927	HP1b,
CHR2L	22671362	22671862	CG40439	HP1b,
CHR2L	22674392	22674892	CG40439	-
CHR2L	22678189	22678689	CG40439	mod(mdg4),CTCF,Trl,
CHR2L	22702432	22702932	CG40439	HP1b,
CHR2L	22704138	22704638	CG40439	HP1b,
CHR2L	22706555	22707055	CG40439	GATAe,HP1b,sens,
CHR2L	22727362	22727862	CG43266	-
CHR2L	22728682	22729182	CG43266	-
CHR2L	22750183	22750683	CG17715	HP1b,
CHR2L	22780738	22781238	lt	-
CHR2L	22803759	22804259	lt	-
CHR2L	22813800	22814300	lt	HP1b,
CHR2L	22821434	22821934	lt	HP1b,
CHR2L	22825184	22825684	lt	-
CHR2L	22836223	22836723	CG40005	-
CHR2L	22841161	22841661	CG40005	-
CHR2L	22869344	22869844	cta	HP1b,
CHR2L	22888600	22889100	cta	HP1b,
CHR2L	22929308	22929808	Cht3	HP1b,
CHR2L	22937308	22937808	Cht3	HP1b,
CHR2L	22938692	22939192	Cht3	-
CHR2L	22940619	22941119	Spf45	HP1b,
CHR2L	22941168	22941668	Spf45	HP1b,
CHR2L	22956567	22957067	Spf45	-
CHR2L	22968436	22968936	CR43242	N,HP1b,Snr1,lola,
CHR2L	2361327	2361827	Rab5	ttk,HDAC3,
CHR2L	2362852	2363352	Rab5	cnc,gro,Trl,twi,dl,Su(H),HDAC1,
CHR2L	2364014	2364514	Rab5	CG8478,cnc,HDAC1,mod(mdg4),CTCF,HDAC4a,tll,Trl,twi,Stat92E,HDAC3,Tbp,dl,bab1,Med,Sin3A,HDAC11,HDAC6,da,E(z),
CHR2L	2374453	2374953	CG15390	cnc,HDAC11,HDAC1,GATAe,Ubx,eve,dm,ttk,HDAC4a,z,HDAC3,Tbp,dl,Med,sens,Sin3A,Mef2,HDAC6,CTCF,
CHR2L	2439678	2440178	dpp	sbb,
CHR2L	244341	244841	kis	HDAC1,Trl,twi,dl,da,
CHR2L	2450751	2451251	dpp	Su(var)3-9,HDAC1,N,Mef2,su(Hw),gro,CTCF,HDAC4a,z,Trl,yki,twi,Dll,Tbp,dl,Su(H),tin,Med,da,
CHR2L	2460741	2461241	tRNA:Y1:22Fb	z,pan,dl,Med,sens,prd,da,
CHR2L	2469211	2469711	tRNA:Y1:22Fa	-
CHR2L	2476180	2476680	tRNA:Y1:22Fa	-
CHR2L	2488426	2488926	Slh	gro,Dll,
CHR2L	248951	249451	kis	bap,Su(var)3-9,HDAC1,psq,gro,HDAC4a,trem,pan,Trl,twi,yki,CG8478,HDAC3,Tbp,dl,cad,Su(H),hb,tin,Med,fru,prd,HDAC11,D,da,Mef2,E(z),
CHR2L	2492059	2492559	Slh	HDAC1,mod(mdg4),CTCF,trem,HDAC3,Trl,twi,Tbp,dl,Med,Sin3A,Ubx,HDAC6,HDAC11,da,
CHR2L	2505557	2506057	CG3528	su(Hw),Hr39,
CHR2L	2526651	2527151	CR44112	-
CHR2L	2530580	2531080	CR44112	su(Hw),
CHR2L	2565330	2565830	Cyp309a1	-
CHR2L	2579977	2580477	CG3214	HDAC11,HDAC1,GATAe,CTCF,HDAC4a,trem,HDAC3,Trl,twi,sens,Tbp,dl,Med,jumu,Sin3A,disco,HDAC6,D,
CHR2L	2652095	2652595	CG33125	-
CHR2L	273353	273853	mbm	HDAC1,dm,HDAC3,twi,Tbp,dl,HDAC11,Sin3A,HDAC6,prd,HDAC4a,
CHR2L	2752387	2752887	CG9894	Su(var)3-9,gsb-n,HDAC1,kn,Mef2,bcd,mod(mdg4),gro,HDAC4a,z,Trl,twi,yki,h,Tbp,psq,dl,Su(H),tin,Mad,hb,Lpt,Med,jumu,sens,Sin3A,HDAC6,prd,da,E(z),
CHR2L	2767561	2768061	Taf10b	Su(var)3-9,HDAC1,hkb,bin,CTCF,HDAC4a,trem,HDAC3,twi,dl,Med,jumu,sens,disco,HDAC6,HDAC11,D,E(z),
CHR2L	276937	277437	CG17078	sna,Sin3A,HDAC1,CTCF,dm,trem,z,tll,HDAC3,bin,Trl,twi,Tbp,dl,slp1,Med,jumu,sens,Mef2,HDAC6,HDAC11,D,Ubx,
CHR2L	2772230	2772730	CG15399	trem,
CHR2L	2804609	2805109	daw	gro,Trl,CBP,bon,Dll,dl,Su(H),Abd-B,insv,
CHR2L	2829539	2830039	Duox	mod(mdg4),HDAC1,GATAe,N,hkb,z,Trl,h,Dll,HDAC4a,psq,dl,Lpt,disco,
CHR2L	2874222	2874722	CG31694	CG8478,Sin3A,HDAC1,mod(mdg4),dm,HDAC4a,Dfd,tll,Trl,twi,Tbp,dl,Med,jumu,HDAC11,Ubx,HDAC6,prd,da,kni,
CHR2L	2878090	2878590	CG31950	CG8478,Sin3A,HDAC1,N,su(Hw),Pcl,HDAC4a,tll,Tbp,dl,slp1,Lpt,Med,HDAC11,HDAC3,Ubx,HDAC6,CTCF,D,kni,
CHR2L	2885646	2886146	lilli	CG8478,Hr78,HDAC1,N,CTCF,su(Hw),mod(mdg4),gro,dm,zfh1,HDAC4a,trem,Dfd,tll,pan,Trl,twi,dl,HDAC11,bab1,Lpt,Med,Sin3A,Mef2,brm,Ubx,HDAC6,prd,Eip74EF,cad,en,Abd-B,D,da,lola,
CHR2L	2887959	2888459	lilli	HDAC1,mod(mdg4),HDAC4a,Trl,twi,dl,hb,Med,da,
CHR2L	2888519	2889019	lilli	HDAC1,GATAe,mod(mdg4),gro,HDAC4a,Trl,usp,twi,yki,psq,dl,EcR,Su(H),hb,Lpt,Med,sens,disco,Mef2,prd,da,
CHR2L	2897212	2897712	lilli	bap,HDAC1,bin,HDAC4a,Trl,twi,dl,tin,Lpt,Med,Eip74EF,Mef2,HDAC11,da,E(z),
CHR2L	2908821	2909321	lilli	CG8478,Trl,dl,EcR,Med,
CHR2L	2935692	2936192	lilli	CTCF,Trl,
CHR2L	2969397	2969897	Ts	HDAC1,HDAC4a,Trl,HDAC3,dl,Med,HDAC6,
CHR2L	2992383	2992883	okr	Su(var)3-9,HDAC1,mod(mdg4),HDAC4a,trem,CBP,HDAC3,Tbp,dl,Med,Sin3A,Mef2,Ubx,HDAC6,HDAC11,cnc,
CHR2L	2999565	3000065	CG17265	sna,HDAC11,HDAC1,ttk,mod(mdg4),HDAC4a,trem,Trl,twi,HDAC3,dl,cad,slp1,hb,Med,Sin3A,disco,Mef2,HDAC6,prd,da,
CHR2L	3011239	3011739	CG17224	-
CHR2L	3058882	3059382	CG3523	chinmo,Trl,bin,hkb,HDAC4a,dl,
CHR2L	3088174	3088674	toc	sbb,Trl,slp1,bab1,
CHR2L	3096981	3097481	toc	-
CHR2L	3114811	3115311	toc	Trl,
CHR2L	3152174	3152674	Mad	GATAe,bin,dl,disco,brm,CG16778,fru,su(Hw),
CHR2L	3231245	3231745	CG34393	-
CHR2L	3238443	3238943	CG3347	-
CHR2L	3247219	3247719	CG3347	-
CHR2L	3264439	3264939	CG3347	-
CHR2L	3304448	3304948	CG3277	-
CHR2L	3346179	3346679	E23	CG8478,gro,HDAC4a,usp,Stat92E,EcR,pan,cnc,
CHR2L	334883	335383	CG31921	-
CHR2L	3394847	3395347	CG34175	su(Hw),CBP,tin,
CHR2L	3413632	3414132	CG31952	CBP,E(z),
CHR2L	3465892	3466392	Pdsw	sna,HDAC11,Sin3A,Su(var)3-9,gsb-n,HDAC1,bcd,HDAC4a,twi,HDAC3,Tbp,dl,hb,Med,Ubx,HDAC6,da,E(z),CTCF,
CHR2L	3479872	3480372	Thor	su(Hw),mod(mdg4),dm,CTCF,bin,
CHR2L	3534048	3534548	Che-13	sna,CG8478,mod(mdg4),Su(H),gro,CTCF,z,Trl,yki,twi,Dll,dl,HDAC11,da,
CHR2L	3538095	3538595	drm	CG8478,gsb-n,HDAC1,Kr,Pcl,HDAC4a,z,tll,Trl,Dll,dl,cad,hb,Med,brm,
CHR2L	3540754	3541254	drm	D,HDAC4a,twi,HDAC1,dl,slp1,Med,sens,prd,ftz,da,
CHR2L	354972	355472	Ent1	Trl,twi,HDAC3,dl,Med,da,
CHR2L	3551001	3551501	drm	chinmo,HDAC4a,CBP,Med,
CHR2L	3562546	3563046	CR43822	CTCF,HDAC4a,
CHR2L	357711	358211	Ent1	Su(var)3-9,HDAC1,CTCF,hkb,bin,gro,HDAC4a,trem,twi,Tbp,dl,slp1,Med,Sin3A,HDAC6,D,
CHR2L	3581262	3581762	sob	sna,CG8478,z,Trl,twi,dl,cad,Med,prd,Mef2,da,HDAC1,
CHR2L	3674131	3674631	Sfp24Bc	tin,
CHR2L	3704944	3705444	CG31778	-
CHR2L	3711308	3711808	cutlet	HDAC1,dm,dl,HDAC6,
CHR2L	3719417	3719917	Shaw	su(Hw),dl,
CHR2L	3776219	3776719	bowl	Su(var)3-9,gsb-n,HDAC1,Kr,bcd,pan,gro,eve,HDAC4a,twi,dl,slp1,hb,Lpt,Med,HDAC11,cad,da,
CHR2L	3776802	3777302	bowl	Kr,gro,eve,pan,Trl,CBP,twi,hth,HDAC4a,dl,slp1,Med,cad,HDAC11,da,HDAC1,
CHR2L	3813731	3814231	CG3407	bap,HDAC1,HDAC4a,bin,twi,dl,gro,tin,Mef2,HDAC6,
CHR2L	3855242	3855742	CR44078	gro,eve,HDAC4a,bin,twi,HDAC11,da,
CHR2L	3872210	3872710	CG31957	HDAC11,HDAC1,Mef2,CTCF,su(Hw),mod(mdg4),dm,HDAC4a,HDAC3,dl,Med,Sin3A,Ubx,HDAC6,D,
CHR2L	3935790	3936290	CG31773	tll,
CHR2L	3957095	3957595	fred	-
CHR2L	3971883	3972383	fred	-
CHR2L	3999067	3999567	CG43797	-
CHR2L	3999669	4000169	CG43797	-
CHR2L	401419	401919	CG4213	-
CHR2L	4036901	4037401	ed	psq,
CHR2L	4057290	4057790	ed	su(Hw),mod(mdg4),dl,Mef2,E(z),
CHR2L	4110257	4110757	Sr-CIII	su(Hw),mod(mdg4),dm,CBP,HDAC4a,
CHR2L	4137151	4137651	CG2955	-
CHR2L	4196428	4196928	CG3714	cnc,HDAC1,CTCF,Trl,dl,
CHR2L	4197532	4198032	CG3714	cnc,Su(var)3-9,HDAC1,Kr,CG8478,dm,CTCF,gro,HDAC4a,Trl,yki,Dll,dl,Su(H),pan,HDAC6,HDAC11,E(z),
CHR2L	421039	421539	CG11885	cnc,HDAC1,CTCF,ttk,mod(mdg4),dm,HDAC3,sens,Tbp,HDAC4a,dl,hb,Med,jumu,Sin3A,HDAC6,D,
CHR2L	4244157	4244657	CR44058	su(Hw),
CHR2L	431073	431573	ex	mod(mdg4),HDAC1,hkb,bin,dm,CTCF,HDAC4a,z,Trl,CBP,twi,Tbp,dl,cad,slp1,Med,sens,disco,Mef2,HDAC3,HDAC6,da,
CHR2L	431598	432098	ex	mod(mdg4),HDAC1,GATAe,bin,CTCF,HDAC4a,Trl,CBP,twi,Tbp,dl,slp1,Med,jumu,sens,Mef2,HDAC3,D,da,
CHR2L	435243	435743	CR43717	chinmo,
CHR2L	4355608	4356108	CG15429	dl,
CHR2L	4368768	4369268	Traf4	sna,shn,twi,hth,dl,cad,slp1,tin,gro,hb,Med,sens,prd,tll,ftz,D,da,Mef2,E(z),
CHR2L	4371866	4372366	Traf4	CG8478,Su(var)3-9,HDAC1,N,ttk,gro,HDAC4a,Dfd,tll,HDAC3,Trl,Dll,twi,yki,hth,Tbp,dl,Su(H),hb,tin,Lpt,Med,Mef2,HDAC6,cad,HDAC11,da,E(z),
CHR2L	452682	453182	crq	HDAC1,N,CTCF,HDAC4a,Trl,twi,HDAC3,Tbp,dl,Med,Sin3A,Ubx,HDAC6,D,
CHR2L	4590742	4591242	dp	-
CHR2L	4627001	4627501	BG642163	HDAC4a,sens,en,
CHR2L	4718576	4719076	CG15631	sbb,su(Hw),
CHR2L	4728161	4728661	CG15631	chinmo,
CHR2L	4755779	4756279	CG42523	-
CHR2L	480326	480826	cbt	Hr78,gsb-n,HDAC1,Mef2,CG8478,pan,gro,HDAC4a,Trl,usp,yki,twi,hth,Tbp,dl,Su(H),tin,Lpt,Med,sens,eve,disco,HDAC11,da,E(z),
CHR2L	481154	481654	cbt	Hr78,bap,gsb-n,HDAC1,Mef2,Dfd,CG8478,pan,cnc,gro,HDAC4a,tll,usp,Trl,Dll,twi,yki,hth,h,Tbp,dl,EcR,tin,Lpt,Med,eve,HDAC11,da,E(z),
CHR2L	4883021	4883521	Cf2	HDAC1,Mef2,dm,Trl,HDAC3,Tbp,HDAC4a,dl,Sin3A,HDAC6,kni,
CHR2L	4886641	4887141	CG15625	HDAC4a,brm,Ubx,su(Hw),HDAC11,
CHR2L	4891168	4891668	CG3036	sbb,bin,Trl,twi,Tbp,dl,Med,da,
CHR2L	4949624	4950124	jet	HDAC11,HDAC1,CTCF,HDAC4a,Dll,HDAC3,dl,Med,Mef2,HDAC6,
CHR2L	4957612	4958112	CG34124	HDAC3,
CHR2L	496292	496792	ush	GATAe,hth,CTCF,Trl,sens,dl,tin,
CHR2L	4970897	4971397	l(2)05714	HDAC11,HDAC1,ttk,CTCF,HDAC4a,Trl,HDAC3,sens,Tbp,dl,Med,Sin3A,HDAC6,
CHR2L	4981752	4982252	CG34126	Su(var)3-9,HDAC1,Trl,twi,Tbp,HDAC4a,dl,Med,sens,Sin3A,eve,disco,HDAC11,brm,Ubx,HDAC6,
CHR2L	498885	499385	ush	Trl,
CHR2L	4997620	4998120	Rtnl1	CG8478,Hr78,Su(H),HDAC1,GATAe,N,CTCF,su(Hw),mod(mdg4),dm,gro,HDAC4a,Dfd,z,usp,Trl,yki,Dll,sens,hkb,dl,bab1,Lpt,jumu,disco,EcR,HDAC11,HDAC6,Eip74EF,D,E(z),
CHR2L	5007751	5008251	Rtnl1	ttk,chinmo,CG8478,
CHR2L	5010646	5011146	CG3887	cnc,HDAC1,mod(mdg4),dm,CTCF,ttk,tll,Trl,yki,HDAC3,Tbp,HDAC4a,dl,Med,Sin3A,HDAC11,HDAC6,
CHR2L	5020451	5020951	vkg	twi,
CHR2L	5052588	5053088	CG14040	HDAC11,Su(var)3-9,HDAC1,dm,gro,HDAC4a,Trl,twi,HDAC3,Tbp,dl,hb,Med,sens,Sin3A,HDAC6,prd,da,Mef2,E(z),
CHR2L	5060137	5060637	qtc	cnc,HDAC1,dm,Tbp,dl,Med,HDAC6,CTCF,prd,HDAC11,
CHR2L	5082281	5082781	pgant5	-
CHR2L	5089608	5090108	pgant5	-
CHR2L	511115	511615	ush	Mef2,bin,Trl,dl,Med,da,HDAC1,
CHR2L	5145720	5146220	Msp-300	cnc,gsb-n,eve,gro,Trl,yki,twi,Dll,dl,Su(H),insv,
CHR2L	5179106	5179606	snoRNA:Psi28S-2263	sens,
CHR2L	5208864	5209364	Cyp28d1	eve,
CHR2L	521368	521868	ush	HDAC1,HDAC4a,pan,Trl,twi,dl,Lpt,Med,cad,HDAC11,da,
CHR2L	5216990	5217490	CG14034	Trl,sens,
CHR2L	5222793	5223293	TpnC25D	sbb,dm,Tbp,
CHR2L	5237062	5237562	tkv	Su(var)3-9,HDAC1,shn,kn,Mef2,bcd,gro,dm,zfh1,HDAC4a,z,Trl,yki,bon,twi,Dll,HDAC3,Tbp,dl,Su(H),tin,hb,Med,HDAC6,prd,Eip74EF,cad,da,
CHR2L	5242386	5242886	tkv	sna,hth,tll,twi,dl,cad,
CHR2L	5247128	5247628	tkv	hth,Mef2,
CHR2L	5261920	5262420	Cyp4ac1	sbb,br,twi,dl,disco,Mef2,
CHR2L	527183	527683	ush	HDAC4a,Trl,
CHR2L	5288650	5289150	Bub1	Trl,h,dl,
CHR2L	5294675	5295175	vri	cnc,cad,CG8478,gro,usp,Trl,CTCF,Stat92E,EcR,sens,
CHR2L	5306351	5306851	vri	CG8478,Hr78,cnc,HDAC1,N,su(Hw),bin,gro,Trl,twi,HDAC3,dl,EcR,Su(H),slp1,Med,sens,prd,da,
CHR2L	531480	531980	ush	chinmo,twi,dl,da,
CHR2L	5322938	5323438	Ncoa6	chinmo,HDAC3,fru,
CHR2L	5324855	5325355	Ncoa6	CG8478,Sin3A,HDAC1,N,cad,z,HDAC3,br,Trl,twi,h,Tbp,dl,HDAC11,Med,HDAC6,CTCF,Abd-B,da,
CHR2L	5327144	5327644	cype	HDAC11,HDAC1,CTCF,HDAC4a,HDAC3,dl,Med,HDAC6,
CHR2L	5409055	5409555	H15	twi,dl,slp1,prd,da,
CHR2L	5476401	5476901	mid	eve,Trl,HDAC4a,gro,jumu,sens,disco,HDAC11,cnc,
CHR2L	5523978	5524478	CG6907	HDAC1,N,dm,HDAC3,dl,Sin3A,Ubx,HDAC6,HDAC11,lola,
CHR2L	5525622	5526122	Cap-D3	Su(var)3-9,HDAC1,ttk,bin,HDAC3,twi,dl,slp1,Med,jumu,sens,HDAC6,da,
CHR2L	5526719	5527219	CG31648	HDAC1,Ubx,HDAC4a,twi,HDAC3,Tbp,dl,bab1,Med,sens,HDAC6,
CHR2L	553008	553508	Ets21C	cnc,Trl,Stat92E,
CHR2L	5543139	5543639	Lam	gsb-n,HDAC1,Mef2,ttk,Dfd,CG8478,dm,z,HDAC3,Trl,twi,h,Tbp,HDAC4a,psq,dl,slp1,tin,Hr39,Med,fru,
CHR2L	568064	568564	CG2807	HDAC1,dm,CTCF,HDAC4a,HDAC3,Trl,twi,Tbp,dl,slp1,Med,Sin3A,Ubx,HDAC6,HDAC11,D,
CHR2L	5724341	5724841	CG11030	Su(var)3-9,HDAC1,Kr,mod(mdg4),dm,CTCF,Trl,CBP,twi,Tbp,dl,bab1,Med,Sin3A,HDAC6,da,
CHR2L	573971	574471	Ipk2	Su(var)3-9,HDAC1,Su(H),dm,gro,CTCF,tll,HDAC3,Trl,h,Tbp,hkb,dl,Med,Sin3A,HDAC11,brm,HDAC6,prd,
CHR2L	5799699	5800199	CG9171	Hr78,mod(mdg4),Su(var)3-9,gsb-n,HDAC1,N,CTCF,HP1b,gro,HDAC4a,Trl,yki,twi,h,Dll,Tbp,dl,Su(H),hb,bab1,Lpt,Med,Sin3A,disco,prd,Eip74EF,Abd-B,da,lola,
CHR2L	5881173	5881673	CG8965	sbb,
CHR2L	5889504	5890004	Acp26Ab	twi,prd,da,
CHR2L	589639	590139	Gsc	Trl,dl,Med,cnc,
CHR2L	5899213	5899713	CG9021	HDAC4a,CBP,
CHR2L	591543	592043	Gsc	HDAC4a,Trl,CBP,dl,HDAC1,
CHR2L	5935133	5935633	Sfp26Ad	sbb,slp1,
CHR2L	5949430	5949930	CG9044	HDAC1,kn,CTCF,dm,tll,HDAC3,yki,HDAC4a,dl,bab1,Med,Sin3A,Ubx,HDAC6,HDAC11,D,
CHR2L	5961580	5962080	Vm26Aa	Su(var)3-9,Trl,twi,dl,Med,su(Hw),da,
CHR2L	5977385	5977885	chic	sna,HDAC11,HDAC1,CG8478,mod(mdg4),gro,HDAC4a,trem,z,Trl,CBP,twi,Dll,Tbp,dl,EcR,Su(H),Lpt,Med,disco,HDAC3,fru,prd,Mef2,da,
CHR2L	5980220	5980720	chic	CG8478,bap,cnc,HDAC11,Su(var)3-9,gsb-n,Stat92E,HDAC1,Mef2,bcd,gro,CTCF,HDAC4a,trem,z,Trl,yki,twi,h,Dll,Tbp,dl,Su(H),tin,Mad,Lpt,Med,Sin3A,HDAC3,Ubx,prd,cad,da,E(z),
CHR2L	5983076	5983576	eIF-4a	sna,CG8478,HDAC11,HDAC1,ttk,bcd,gro,HDAC4a,z,Trl,CTCF,twi,HDAC3,sens,Tbp,dl,Su(H),hb,Med,Sin3A,prd,D,da,Mef2,cnc,
CHR2L	5986101	5986601	ifc	Hr78,lola,Su(var)3-9,HDAC1,N,CTCF,HP1b,hkb,dm,HDAC4a,trem,Dfd,twi,h,HDAC3,Tbp,dl,slp1,Med,Sin3A,HDAC6,prd,Snr1,Eip74EF,HDAC11,Abd-B,da,
CHR2L	6047702	6048202	slmo	sna,Hr78,HDAC1,ttk,HDAC4a,HDAC3,br,CTCF,Trl,twi,Tbp,dl,cad,hb,bab1,Med,Sin3A,Ubx,HDAC6,da,
CHR2L	6085697	6086197	Kr-h1	N,Trl,bon,
CHR2L	6088251	6088751	Kr-h1	CG8478,Hr78,cnc,gsb-n,HDAC1,N,Mef2,su(Hw),D,dm,gro,HDAC4a,z,Trl,usp,twi,yki,Stat92E,Dll,Tbp,dl,EcR,Su(H),Lpt,Med,CG16778,fru,HDAC6,HDAC11,Abd-B,da,kni,
CHR2L	6098756	6099256	CG9175	Su(var)3-9,HDAC1,su(Hw),mod(mdg4),dm,HDAC4a,HDAC3,usp,Trl,twi,h,Tbp,psq,dl,Med,Sin3A,Mef2,Ubx,HDAC6,HDAC11,ftz,CTCF,
CHR2L	6100167	6100667	stai	CG8478,psq,dl,EcR,
CHR2L	6108016	6108516	stai	sbb,dl,hb,
CHR2L	6165436	6165936	CG13989	gro,
CHR2L	6201969	6202469	Ugt37b1	chinmo,E(z),
CHR2L	623046	623546	lectin-21Ca	gro,Dll,
CHR2L	6271959	6272459	CR42735	-
CHR2L	6324110	6324610	Gef26	CG8478,Hr78,Su(var)3-9,Stat92E,HDAC1,N,CTCF,mod(mdg4),dm,gro,zfh1,Dfd,sc,HDAC3,Trl,yki,twi,h,Dll,Tbp,dl,Su(H),bab1,Med,Sin3A,fru,Eip74EF,Abd-B,da,lola,
CHR2L	633294	633794	CG2839	gro,
CHR2L	636703	637203	CG2839	-
CHR2L	6370941	6371441	slam	chinmo,dl,
CHR2L	6480167	6480667	Sec61alpha	mod(mdg4),HDAC11,Sin3A,HDAC1,GATAe,kn,Mef2,dm,CTCF,HDAC4a,z,tll,Trl,twi,Tbp,dl,hb,bab1,Lpt,Med,jumu,sens,HDAC3,Ubx,HDAC6,prd,da,E(z),
CHR2L	6481096	6481596	DLP	CG8478,Hr78,mod(mdg4),Su(var)3-9,HDAC1,kn,N,Mef2,dm,CTCF,HDAC4a,z,Trl,bin,twi,HDAC3,Tbp,dl,hb,tin,bab1,Med,sens,Sin3A,HDAC11,Ubx,fru,HDAC6,prd,Abd-B,D,da,E(z),lola,
CHR2L	6489076	6489576	epsilonCOP	HDAC1,ttk,mod(mdg4),chinmo,HDAC3,CTCF,Trl,twi,dl,Med,Sin3A,Ubx,HDAC6,kni,
CHR2L	6524265	6524765	eya	-
CHR2L	6532914	6533414	eya	twi,dl,tin,da,
CHR2L	6537656	6538156	eya	CTCF,z,sens,
CHR2L	6544430	6544930	eya	bcd,twi,dl,Med,da,
CHR2L	6610730	6611230	CG11050	HDAC11,Su(var)3-9,HDAC1,Kr,CTCF,HDAC4a,pan,bin,CBP,twi,sc,h,Tbp,dl,slp1,bab1,Med,Sin3A,CG16778,prd,HDAC6,da,Mef2,
CHR2L	6612318	6612818	CG11050	mod(mdg4),HDAC11,Su(var)3-9,gsb-n,HDAC1,kn,Dfd,CG8478,eve,dm,HDAC4a,trem,usp,Trl,twi,Stat92E,h,Tbp,dl,slp1,Med,HDAC3,HDAC6,cad,da,E(z),
CHR2L	6628015	6628515	Oatp26F	chinmo,su(Hw),HDAC11,
CHR2L	6644463	6644963	CG31635	psq,Trl,CBP,dl,disco,usp,cad,
CHR2L	6649158	6649658	Tango1	Hr78,HDAC11,Sin3A,HDAC1,N,Mef2,cad,CTCF,HDAC4a,trem,Dfd,tll,HDAC3,Trl,sens,Tbp,dl,Lpt,Med,jumu,Ubx,HDAC6,lola,
CHR2L	6658265	6658765	CG11070	HDAC11,HDAC1,HDAC4a,HDAC3,HDAC6,
CHR2L	66698	67198	dbr	CG8478,Hr78,bap,Su(var)3-9,HDAC1,GATAe,N,Mef2,su(Hw),mod(mdg4),gro,CTCF,zfh1,HDAC4a,Dfd,Trl,twi,yki,sc,bon,Tbp,dl,Su(H),slp1,tin,hb,Lpt,Med,disco,prd,Eip74EF,D,da,cnc,lola,
CHR2L	6717553	6718053	CG11188	Su(var)3-9,HDAC1,su(Hw),mod(mdg4),dm,CTCF,HDAC4a,HDAC3,Tbp,dl,sens,Sin3A,disco,HDAC6,D,
CHR2L	6768752	6769252	CG11321	chinmo,Dll,Hr39,
CHR2L	6780539	6781039	CG17378	CBP,
CHR2L	6791811	6792311	nrv2	gsb-n,GATAe,gro,z,Trl,yki,HDAC3,dl,Su(H),
CHR2L	681599	682099	ds	-
CHR2L	6956742	6957242	CG3430	mod(mdg4),HDAC11,HDAC1,ttk,HP1b,Ubx,dm,HDAC4a,twi,HDAC3,Tbp,dl,hb,Med,jumu,sens,Sin3A,HDAC6,da,E(z),
CHR2L	6966516	6967016	smt3	cnc,HDAC1,N,CG8478,HDAC4a,twi,HDAC3,Tbp,dl,Lpt,Med,HDAC11,da,
CHR2L	6967159	6967659	smt3	HDAC1,kn,dm,CTCF,HDAC4a,trem,z,tll,pan,yki,twi,HDAC3,Tbp,dl,bab1,Lpt,Med,Sin3A,Ubx,HDAC11,da,
CHR2L	7027119	7027619	CG31908	HDAC1,dm,HDAC4a,yki,twi,HDAC3,Tbp,dl,Med,Sin3A,Ubx,HDAC6,
CHR2L	7032400	7032900	Rab30	lola,HDAC1,GATAe,N,CTCF,hkb,HDAC4a,HDAC3,CBP,twi,Tbp,dl,Med,jumu,sens,Sin3A,disco,Ubx,HDAC6,HDAC11,D,
CHR2L	7042907	7043407	milt	HDAC1,Mef2,CG8478,hth,gro,bin,Trl,twi,dl,Med,sens,cad,HDAC11,da,
CHR2L	7049042	7049542	milt	mod(mdg4),cnc,gsb-n,HDAC1,shn,bcd,HP1b,pan,eve,dm,z,Trl,yki,twi,Tbp,dl,Su(H),hb,Med,jumu,disco,Mef2,HDAC11,prd,cad,da,E(z),
CHR2L	7063868	7064368	CG13779	cnc,HDAC1,dm,HDAC3,Tbp,dl,Med,HDAC6,CTCF,HDAC11,
CHR2L	7072496	7072996	CG11289	dm,
CHR2L	7091030	7091530	Pvf2	-
CHR2L	7268410	7268910	Wnt4	gro,
CHR2L	7274411	7274911	Wnt4	-
CHR2L	7309972	7310472	wg	sna,bap,shn,bin,D,twi,hth,dl,cad,tin,hb,Med,sens,Mef2,prd,tll,ftz,da,E(z),
CHR2L	7324878	7325378	Wnt6	-
CHR2L	7330299	7330799	Wnt6	gro,
CHR2L	7342047	7342547	Wnt6	-
CHR2L	7386483	7386983	CG5149	Kr,bin,CTCF,twi,HDAC3,tin,disco,pan,HDAC11,
CHR2L	7424424	7424924	CR43857	Hr78,N,CG8478,CTCF,Trl,CBP,psq,dl,Su(H),HDAC1,lola,
CHR2L	7425195	7425695	CG5261	Su(var)3-9,HDAC1,CG8478,Trl,psq,dl,Su(H),EcR,usp,
CHR2L	7486119	7486619	CG42533	HDAC11,EcR,
CHR2L	7494250	7494750	CG42533	HDAC4a,Trl,CTCF,twi,HDAC1,dl,HDAC11,
CHR2L	7517025	7517525	CR44082	chinmo,twi,dl,tin,sens,da,
CHR2L	769043	769543	CG12506	chinmo,
CHR2L	7746007	7746507	CG7211	-
CHR2L	7799905	7800405	r2d2	sna,mod(mdg4),cnc,HDAC1,kn,eve,dm,CTCF,trem,tll,br,yki,Trl,twi,HDAC3,Tbp,HDAC4a,dl,HDAC11,Med,Sin3A,EcR,HDAC6,Ubx,E(z),
CHR2L	7813146	7813646	LanB1	eve,CTCF,bin,Trl,twi,
CHR2L	7821419	7821919	CG7115	HDAC1,trem,z,twi,Tbp,dl,Sin3A,HDAC6,HDAC11,
CHR2L	7828455	7828955	mts	sna,CG8478,Hr78,HDAC11,Su(var)3-9,HDAC1,N,Mef2,CTCF,mod(mdg4),gro,HDAC4a,Dfd,tll,pan,Trl,br,yki,sc,twi,Stat92E,h,Dll,HDAC3,Tbp,dl,Su(H),hb,Lpt,Med,Sin3A,HDAC6,Eip74EF,insv,da,E(z),
CHR2L	7868244	7868744	Proct	-
CHR2L	7913299	7913799	Spn28Db	Mef2,hth,
CHR2L	7914610	7915110	Spn28Db	Mef2,br,Trl,twi,Hr39,D,
CHR2L	7940398	7940898	Snoo	CG8478,Stat92E,Trl,bon,dl,
CHR2L	7973469	7973969	Snoo	CG8478,gro,bon,pan,
CHR2L	7992649	7993149	pes	cnc,HDAC1,ttk,Trl,CBP,twi,dl,Med,HDAC3,prd,
CHR2L	8000585	8001085	CG7224	HDAC4a,HDAC6,Mef2,
CHR2L	8042740	8043240	RpL36A	gsb-n,HDAC1,CTCF,trem,twi,HDAC3,Tbp,dl,bab1,Med,Sin3A,Ubx,HDAC11,
CHR2L	8043299	8043799	CG7466	HDAC11,HDAC1,CTCF,HDAC3,twi,Tbp,HDAC4a,dl,bab1,Med,Sin3A,Ubx,HDAC6,
CHR2L	8072613	8073113	MED20	HDAC1,HDAC3,br,Tbp,HDAC4a,dl,Med,Sin3A,HDAC6,
CHR2L	8083273	8083773	Bsg	CG8478,Hr78,Su(var)3-9,Stat92E,HDAC1,N,mod(mdg4),dm,CTCF,gro,zfh1,HDAC4a,trem,Dfd,z,Trl,yki,sc,twi,h,Dll,Tbp,dl,Su(H),tin,Lpt,Med,Sin3A,Ubx,HDAC6,Eip74EF,Mef2,HDAC11,Abd-B,da,lola,
CHR2L	8085483	8085983	Bsg	HDAC1,su(Hw),mod(mdg4),Trl,CBP,dl,CTCF,HDAC11,
CHR2L	8092733	8093233	Bsg	twi,dl,
CHR2L	8142927	8143427	CG42762	CBP,dl,hb,Med,HDAC1,
CHR2L	8149875	8150375	CG43394	-
CHR2L	815551	816051	Saf6	HDAC11,HDAC1,bin,dm,HDAC4a,HDAC3,dl,Med,HDAC6,
CHR2L	8195133	8195633	CR44116	HDAC3,sens,
CHR2L	819628	820128	Clp	HDAC11,HDAC1,GATAe,su(Hw),chinmo,dm,CTCF,tll,bin,Trl,HDAC3,Tbp,HDAC4a,dl,Med,Sin3A,HDAC6,twi,E(z),
CHR2L	8212715	8213215	CG8360	cnc,HDAC1,dm,ttk,HDAC4a,tll,Trl,twi,HDAC3,Tbp,dl,Med,sens,Sin3A,eve,HDAC11,brm,usp,HDAC6,CTCF,da,
CHR2L	8218287	8218787	CG8292	HDAC3,sens,
CHR2L	825608	826108	CG3862	mod(mdg4),Su(var)3-9,HDAC1,N,CTCF,CG8478,dm,HDAC4a,Mef2,Trl,twi,HDAC3,sens,Tbp,dl,Med,jumu,Sin3A,HDAC6,prd,HDAC11,D,da,E(z),
CHR2L	8271162	8271662	Btk29A	-
CHR2L	8299526	8300026	Btk29A	gro,Trl,CBP,Dll,psq,dl,HDAC1,
CHR2L	8305122	8305622	CG7840	HDAC1,Trl,twi,HDAC3,HDAC4a,dl,Med,HDAC6,
CHR2L	8334466	8334966	CG14274	mod(mdg4),HDAC1,su(Hw),dm,trem,
CHR2L	8362176	8362676	CG7627	gsb-n,HDAC1,eve,Trl,twi,HDAC3,Tbp,dl,Med,HDAC11,Mef2,D,
CHR2L	8374253	8374753	Wdr82	HDAC11,HDAC1,HDAC4a,HDAC3,sens,dl,jumu,HDAC6,
CHR2L	8381438	8381938	Aats-ala	HDAC11,HDAC1,ttk,Ubx,HDAC4a,HDAC3,twi,Tbp,dl,Med,Sin3A,HDAC6,CTCF,da,
CHR2L	8383768	8384268	l(2)k12914	HDAC11,Su(var)3-9,HDAC1,Kr,ttk,Trl,twi,HDAC3,Tbp,dl,Med,HDAC6,da,
CHR2L	8403290	8403790	emb	CG8478,Hr78,HDAC1,N,psq,CTCF,HDAC4a,trem,HDAC3,Trl,twi,Tbp,hkb,dl,HDAC11,Med,Sin3A,Mef2,HDAC6,Abd-B,
CHR2L	840639	841139	drongo	-
CHR2L	841570	842070	drongo	HDAC4a,pan,
CHR2L	8417450	8417950	Akap200	sna,twi,psq,dl,hb,Med,HDAC3,da,
CHR2L	8418555	8419055	Akap200	HDAC1,Trl,twi,dl,sens,da,
CHR2L	8423838	8424338	Akap200	HDAC1,Mef2,mod(mdg4),dm,CTCF,HDAC4a,z,Trl,Tbp,dl,HDAC6,HDAC11,
CHR2L	844231	844731	drongo	-
CHR2L	850847	851347	drongo	sna,mod(mdg4),Su(var)3-9,HDAC1,CTCF,dm,HDAC4a,HDAC3,Trl,twi,Tbp,dl,Med,Sin3A,fru,HDAC6,da,E(z),
CHR2L	8514890	8515390	CG13089	HDAC11,HDAC1,dm,HDAC3,twi,Tbp,HDAC4a,dl,Med,sens,Sin3A,Ubx,HDAC6,E(z),
CHR2L	8517363	8517863	CG13090	HDAC1,chinmo,twi,HDAC3,Tbp,HDAC4a,dl,hb,Med,Sin3A,Ubx,HDAC6,
CHR2L	852459	852959	CG4291	cnc,HDAC11,Su(var)3-9,HDAC1,Su(H),dm,HDAC3,Tbp,HDAC4a,dl,Med,Sin3A,HDAC6,E(z),CTCF,
CHR2L	8543615	8544115	Sema-1a	HDAC11,HDAC1,Mef2,eve,gro,HDAC4a,z,Trl,Dll,yki,twi,Tbp,psq,dl,Su(H),hb,Med,Ubx,HDAC6,prd,D,da,
CHR2L	8583369	8583869	CR43855	pan,HDAC11,
CHR2L	8601543	8602043	CR43855	su(Hw),mod(mdg4),eve,CBP,CTCF,
CHR2L	8604368	8604868	CR43855	-
CHR2L	8609322	8609822	tRNA:CR31602	su(Hw),
CHR2L	8635328	8635828	tRNA:CR31602	CBP,
CHR2L	8685810	8686310	PrBP	Su(var)3-9,HDAC1,su(Hw),HDAC4a,br,twi,HDAC3,dl,Med,Sin3A,HDAC11,Ubx,HDAC6,da,
CHR2L	8692494	8692994	Hnf4	cnc,CG8478,eve,gro,Trl,HDAC11,HDAC1,
CHR2L	870709	871209	PNUTS	lola,HDAC1,CTCF,mod(mdg4),eve,dm,trem,twi,HDAC3,Tbp,dl,Med,Sin3A,fru,HDAC6,HDAC11,D,E(z),
CHR2L	8718054	8718554	Hnf4	Hr78,N,CG8478,eve,hth,gro,Trl,yki,bon,Dll,HDAC4a,dl,Su(H),Eip74EF,
CHR2L	874072	874572	ninaA	CTCF,HDAC3,
CHR2L	8803204	8803704	CG42712	twi,
CHR2L	8814937	8815437	CG42712	-
CHR2L	8830701	8831201	SoxN	sens,
CHR2L	8899079	8899579	CG34398	-
CHR2L	892963	893463	Lsp1beta	chinmo,
CHR2L	9058956	9059456	CG31708	-
CHR2L	9079582	9080082	CG12439	-
CHR2L	9182960	9183460	tai	Su(var)3-9,GATAe,su(Hw),Trl,sens,D,
CHR2L	9190626	9191126	tai	bap,bin,eve,Trl,dl,tin,Mef2,
CHR2L	9197724	9198224	tai	-
CHR2L	9203370	9203870	tai	N,gro,trem,usp,Trl,dl,EcR,E(z),HDAC1,
CHR2L	9215493	9215993	tRNA:CR31885	-
CHR2L	9229984	9230484	tRNA:CR31885	cnc,Trl,twi,
CHR2L	9281266	9281766	CG42844	-
CHR2L	9303812	9304312	CG42844	-
CHR2L	933067	933567	CG4341	-
CHR2L	9388037	9388537	Aldh	cnc,eve,dm,HDAC4a,usp,twi,dl,da,
CHR2L	939552	940052	CG4341	chinmo,Hr39,cad,
CHR2L	9438063	9438563	numb	HDAC4a,dl,
CHR2L	9467138	9467638	CR43769	su(Hw),dl,Hr39,
CHR2L	9569383	9569883	CG3838	sna,cnc,HDAC1,N,Mef2,Dfd,eve,CTCF,z,bin,Trl,twi,Tbp,dl,hb,Med,CG16778,HDAC11,da,
CHR2L	9570821	9571321	CG3838	sna,dl,Med,da,
CHR2L	9736164	9736664	CG13117	Trl,brm,
CHR2L	986108	986608	CG4375	chinmo,
CHR2L	9876927	9877427	nAcRalpha-30D	-
CHR2L	9884699	9885199	nAcRalpha-30D	su(Hw),
CHR2L	9890602	9891102	CG4537	HDAC11,HDAC1,hkb,CTCF,HDAC4a,HDAC3,twi,Tbp,dl,Med,jumu,Sin3A,HDAC6,
CHR2L	9908431	9908931	CG13124	GATAe,Mef2,gro,HDAC3,Trl,dl,Su(H),
CHR2L	9953976	9954476	CG13126	HDAC1,HDAC3,Tbp,HDAC4a,dl,Sin3A,HDAC6,HDAC11,
CHR2L	9982834	9983334	bib	gro,HDAC4a,dl,HDAC11,
CHR2R	10015708	10016208	Prosap	eve,HDAC1,
CHR2R	1002006	1002506	gus	HP1b,HDAC4a,
CHR2R	10021762	10022262	Prosap	CG8478,
CHR2R	10035239	10035739	Rcd1	dm,HDAC3,cad,bab1,
CHR2R	10040212	10040712	Rcd1	HDAC11,Sin3A,gsb-n,HDAC1,hkb,dm,HDAC4a,trem,br,twi,HDAC3,Tbp,dl,Med,jumu,Ubx,HDAC6,CTCF,
CHR2R	10060883	10061383	cg	CG8478,Hr78,HDAC11,HDAC1,N,Mef2,CTCF,cnc,dm,HDAC4a,HDAC3,bin,Trl,twi,Tbp,dl,Med,Sin3A,fru,HDAC6,Abd-B,D,da,
CHR2R	10062682	10063182	cg	CG8478,Hr78,mod(mdg4),cnc,HDAC1,N,Mef2,su(Hw),dm,zfh1,HDAC4a,Dfd,bin,Trl,sc,twi,h,HDAC3,Tbp,dl,Med,Sin3A,fru,HDAC6,Snr1,Eip74EF,cad,Abd-B,tin,da,lola,
CHR2R	10104653	10105153	RpS23	cnc,HDAC1,kn,cad,mod(mdg4),dm,CTCF,HDAC4a,CBP,twi,dl,bab1,Med,Sin3A,Ubx,HDAC6,HDAC11,
CHR2R	10127072	10127572	CG8485	cnc,HDAC1,HDAC3,Trl,Tbp,dl,Med,Sin3A,disco,HDAC6,HDAC11,D,E(z),
CHR2R	10153052	10153552	CG8547	Trl,
CHR2R	10198075	10198575	Shroom	sna,shn,bcd,twi,dl,EcR,slp1,hb,Med,prd,tll,cad,ftz,da,
CHR2R	10209977	10210477	Shroom	CG8478,twi,Med,
CHR2R	10222167	10222667	Shroom	twi,dl,slp1,Med,prd,cad,da,
CHR2R	10229246	10229746	Shroom	HDAC4a,dl,HDAC3,HDAC6,
CHR2R	10231513	10232013	Shroom	-
CHR2R	10250284	10250784	Tfb1	Hr78,HDAC11,Stat92E,HDAC1,N,HP1b,dm,trem,Dfd,HDAC3,Trl,HDAC4a,dl,Med,Sin3A,Ubx,HDAC6,Snr1,Eip74EF,Abd-B,CTCF,lola,
CHR2R	10299201	10299701	Sin1	Su(var)3-9,HDAC1,dm,CTCF,HDAC4a,trem,tll,Trl,CBP,twi,HDAC3,Tbp,dl,Med,Sin3A,HDAC11,Ubx,HDAC6,E(z),
CHR2R	10372382	10372882	L	Su(var)3-9,gsb-n,HDAC1,pan,eve,hth,zfh1,HDAC4a,Trl,bin,bon,Dfd,psq,HDAC11,brm,HDAC6,Snr1,cad,
CHR2R	10381415	10381915	Cpsf160	CTCF,cad,
CHR2R	10423455	10423955	ttv	su(Hw),
CHR2R	10449113	10449613	ttv	Hr39,
CHR2R	10461889	10462389	LamC	gsb-n,CG8478,eve,Trl,HDAC4a,dl,Su(H),usp,Mef2,HDAC11,
CHR2R	10488519	10489019	RpI1	mod(mdg4),HDAC11,HDAC1,GATAe,hkb,dm,HDAC4a,HDAC3,twi,sens,Tbp,dl,Med,jumu,Sin3A,disco,HDAC6,D,E(z),
CHR2R	10522758	10523258	CG43236	-
CHR2R	10531805	10532305	CG10139	dm,HDAC3,Tbp,dl,prd,HDAC1,
CHR2R	10600790	10601290	mspo	mod(mdg4),HDAC1,Mef2,HDAC4a,Trl,bin,yki,Dll,dl,Med,
CHR2R	10639545	10640045	Rpn6	cnc,Sin3A,HDAC1,GATAe,kn,CTCF,bcd,HDAC4a,z,HDAC3,br,Trl,Tbp,dl,Med,sens,HDAC6,HDAC11,Ubx,
CHR2R	10643775	10644275	CG12859	sna,HDAC1,ttk,CTCF,HDAC4a,trem,HDAC3,Trl,twi,Tbp,dl,Med,Sin3A,Ubx,HDAC6,
CHR2R	10735473	10735973	CG10209	CG8478,mod(mdg4),Su(var)3-9,HDAC1,N,Trl,HDAC3,dl,Med,Sin3A,HDAC6,Abd-B,lola,
CHR2R	10739855	10740355	SMC2	HDAC1,mod(mdg4),ttk,HDAC4a,tll,CTCF,CBP,HDAC3,dl,Sin3A,HDAC11,Ubx,HDAC6,kni,
CHR2R	10810707	10811207	CG10249	-
CHR2R	10851038	10851538	ckn	bap,HDAC1,bin,gro,eve,hth,HDAC4a,Trl,twi,HDAC3,Tbp,dl,cad,tin,Med,Sin3A,Ubx,Mef2,HDAC11,da,
CHR2R	10852157	10852657	ckn	bap,Su(var)3-9,HDAC1,Mef2,bin,gro,hth,usp,Trl,twi,yki,sc,bon,Dll,Tbp,dl,Su(H),tin,Lpt,Med,brm,cad,HDAC11,insv,da,
CHR2R	10860563	10861063	ckn	-
CHR2R	10909920	10910420	Obp51a	-
CHR2R	10964637	10965137	CG33467	HDAC4a,HDAC3,
CHR2R	10972094	10972594	CG33467	su(Hw),
CHR2R	11022671	11023171	chn	HDAC1,h,gro,Trl,bon,Dll,dl,Su(H),insv,
CHR2R	11023679	11024179	chn	Trl,dl,
CHR2R	11024801	11025301	Rpb12	Trl,
CHR2R	11052720	11053220	igl	-
CHR2R	11062464	11062964	CG43068	-
CHR2R	11103598	11104098	CG11808	HDAC1,ttk,Trl,CBP,HDAC3,Tbp,dl,Sin3A,disco,HDAC6,
CHR2R	11122858	11123358	Fs	chinmo,
CHR2R	11127355	11127855	Fs	HDAC4a,
CHR2R	11128217	11128717	Fs	Trl,
CHR2R	1113382	1113882	Nipped-A	HP1b,
CHR2R	111383	111883	IntS3	-
CHR2R	11238397	11238897	unc-5	HDAC1,Mef2,Kr,ttk,su(Hw),gro,hth,bin,Trl,CBP,twi,h,Tbp,HDAC4a,dl,slp1,tin,Lpt,Med,disco,Ubx,cad,HDAC11,da,
CHR2R	11251417	11251917	Pms2	HDAC3,
CHR2R	11267912	11268412	SRPK	CG8478,HDAC11,HDAC1,CTCF,hkb,dm,HDAC4a,tll,Trl,twi,HDAC3,Tbp,dl,Hr39,hb,Med,jumu,Sin3A,Ubx,HDAC6,D,da,Mef2,
CHR2R	11417504	11418004	Khc-73	sna,twi,dl,hb,Med,sens,disco,HDAC3,da,
CHR2R	11428565	11429065	CG8187	HDAC1,Ubx,dm,CBP,HDAC3,Tbp,HDAC4a,dl,Med,jumu,Sin3A,brm,HDAC6,Mef2,
CHR2R	11429863	11430363	eIF2B-gamma	cnc,HDAC1,dm,HDAC3,twi,Tbp,HDAC4a,dl,Sin3A,HDAC6,
CHR2R	11477617	11478117	CG8204	-
CHR2R	11481371	11481871	CG42524	CBP,su(Hw),
CHR2R	11501560	11502060	CG42524	N,chinmo,gro,Trl,dl,EcR,Abd-B,
CHR2R	11504980	11505480	CG42524	-
CHR2R	11542092	11542592	fus	Trl,
CHR2R	11620880	11621380	CG30089	CTCF,Pcl,twi,hth,dl,
CHR2R	11627225	11627725	CG30089	Su(var)3-9,HDAC1,GATAe,CG8478,gro,z,Trl,twi,dl,hb,Lpt,Med,jumu,sens,disco,prd,cad,da,
CHR2R	11632899	11633399	CG30089	twi,HDAC4a,dl,HDAC11,
CHR2R	11689504	11690004	Zasp52	cad,Trl,twi,
CHR2R	11699346	11699846	Zasp52	-
CHR2R	11700095	11700595	Zasp52	dl,
CHR2R	11701869	11702369	Zasp52	dl,sens,
CHR2R	11793373	11793873	sli	chinmo,
CHR2R	1179341	1179841	d4	HP1b,
CHR2R	11818449	11818949	bdg	Su(var)3-9,HDAC1,gro,HDAC4a,z,Trl,twi,Tbp,dl,Lpt,Med,HDAC11,da,
CHR2R	11878530	11879030	CG8314	HDAC11,HDAC1,Ubx,dm,ttk,HDAC4a,HDAC3,CTCF,yki,twi,dl,Med,sens,HDAC6,da,
CHR2R	11879653	11880153	CG8320	Su(var)3-9,HDAC1,GATAe,ttk,Ubx,eve,dm,yki,twi,HDAC3,sens,Dfd,HDAC4a,dl,Med,jumu,Sin3A,usp,HDAC6,HDAC11,D,da,
CHR2R	11902144	11902644	Rrp42	Hr78,lola,cnc,HDAC1,N,CTCF,dm,HDAC4a,trem,Dfd,HDAC3,Trl,twi,sens,Tbp,dl,Med,Sin3A,EcR,Mef2,HDAC6,Eip74EF,HDAC11,Abd-B,
CHR2R	11910352	11910852	casp	-
CHR2R	11954445	11954945	CR43415	-
CHR2R	11990174	11990674	Rho1	CG8478,Hr78,bap,cnc,Su(var)3-9,HDAC1,N,Mef2,su(Hw),mod(mdg4),gro,zfh1,HDAC4a,Dfd,z,tll,HDAC3,Trl,yki,sc,bon,twi,Dll,Tbp,dl,Su(H),hb,tin,Lpt,Med,Sin3A,HDAC6,Eip74EF,HDAC11,Abd-B,Ubx,da,CTCF,lola,
CHR2R	11992171	11992671	Rho1	CG8478,Hr78,mod(mdg4),cnc,HDAC1,N,ttk,gro,Trl,yki,bon,HDAC3,Tbp,dl,Med,E(z),
CHR2R	12013544	12014044	spin	cnc,pan,Trl,dl,
CHR2R	12014968	12015468	spin	cnc,ttk,Trl,da,
CHR2R	12016311	12016811	spin	cnc,CG8478,hkb,gro,Trl,dl,EcR,usp,
CHR2R	12017337	12017837	spin	cnc,Su(var)3-9,HDAC1,Mef2,gro,Trl,bin,yki,CG8478,bon,Dll,dl,Su(H),
CHR2R	12048182	12048682	CG10734	ttk,eve,gro,CG8478,twi,dl,
CHR2R	12050903	12051403	CG10734	bap,Mef2,dl,
CHR2R	12083586	12084086	calypso	HDAC1,dm,CTCF,ttk,HDAC4a,yki,HDAC3,Tbp,dl,Med,Sin3A,Mef2,HDAC11,Ubx,HDAC6,kni,
CHR2R	12101600	12102100	mrj	-
CHR2R	12182010	12182510	Atg9	HDAC1,trem,HDAC3,sens,dl,Med,Sin3A,HDAC6,Snr1,HDAC11,da,E(z),
CHR2R	12197867	12198367	Nox	chinmo,bin,
CHR2R	12198944	12199444	Nox	chinmo,
CHR2R	12223314	12223814	Hmgs	mod(mdg4),gsb-n,HDAC1,GATAe,su(Hw),dm,CTCF,HDAC4a,trem,Trl,twi,sens,Tbp,dl,Med,jumu,Sin3A,disco,Ubx,HDAC6,prd,en,HDAC11,da,
CHR2R	12299995	12300495	Menl-2	-
CHR2R	12346526	12347026	CheB53a	-
CHR2R	1235320	1235820	CG10395	HP1b,
CHR2R	12403485	12403985	Sema-2a	sna,HDAC1,dm,zfh1,Trl,twi,Tbp,dl,hb,Med,Sin3A,cad,da,
CHR2R	12471065	12471565	RpLP2	Hr78,mod(mdg4),HDAC1,CTCF,CG8478,dm,gro,HDAC4a,z,pan,Trl,twi,yki,HDAC3,Tbp,dl,cad,Su(H),tin,Med,Mef2,D,da,
CHR2R	12481836	12482336	CG8306	CG8478,Hr78,mod(mdg4),HDAC1,GATAe,N,CTCF,psq,Kr,bin,dm,gro,zfh1,HDAC4a,Dfd,Trl,Mef2,twi,yki,Tbp,dl,hb,bab1,Lpt,Med,Stat92E,HDAC11,prd,Eip74EF,da,E(z),lola,
CHR2R	1253394	1253894	CR42646	HP1b,
CHR2R	12613604	12614104	CG30463	-
CHR2R	12618835	12619335	CG30463	sna,Hr78,HDAC1,dm,Trl,twi,Tbp,dl,Med,Mef2,insv,da,
CHR2R	12650985	12651485	CG42392	-
CHR2R	1266119	1266619	CR42646	-
CHR2R	12673581	12674081	CG5522	twi,dl,Med,cad,da,
CHR2R	12705383	12705883	CR43417	-
CHR2R	12716073	12716573	CR43650	CG8478,HDAC1,bcd,dm,gro,HDAC4a,z,Trl,twi,Tbp,dl,Med,HDAC11,insv,da,
CHR2R	12717679	12718179	CR43650	HDAC1,HDAC4a,tll,HDAC3,Trl,CBP,twi,h,Tbp,dl,HDAC11,Med,Sin3A,D,da,
CHR2R	12737803	12738303	IntS8	HDAC1,bcd,trem,HDAC3,twi,dl,Med,Sin3A,HDAC6,da,CTCF,
CHR2R	12749622	12750122	snoRNA:Dek-a	HDAC3,
CHR2R	12813793	12814293	Pkc53E	su(Hw),
CHR2R	1281518	1282018	laccase2	-
CHR2R	12839030	12839530	mute	mod(mdg4),HDAC1,bcd,dm,HDAC3,twi,Tbp,dl,hb,Med,HDAC6,HDAC11,
CHR2R	1287830	1288330	laccase2	HP1b,sens,
CHR2R	12888822	12889322	ste24a	HDAC11,HDAC1,Ubx,HDAC4a,CBP,HDAC3,sens,dl,jumu,Sin3A,disco,HDAC6,
CHR2R	12898480	12898980	Ehbp1	HDAC3,
CHR2R	12915734	12916234	RhoGEF2	CG8478,Hr78,cnc,HDAC1,GATAe,N,su(Hw),mod(mdg4),gro,zfh1,Trl,CBP,yki,twi,Dll,HDAC3,Tbp,dl,Su(H),tin,Lpt,Med,sens,Sin3A,disco,Mef2,prd,cad,da,lola,
CHR2R	12979177	12979677	Sply	cnc,HDAC11,HDAC1,GATAe,hkb,HDAC4a,Trl,EcR,jumu,Sin3A,Ubx,HDAC6,D,da,
CHR2R	12983173	12983673	GstS1	CG8478,cad,
CHR2R	12986399	12986899	GstS1	mod(mdg4),CTCF,HDAC4a,bab1,
CHR2R	12995419	12995919	CG15611	CTCF,bin,Trl,
CHR2R	12998527	12999027	CG15611	-
CHR2R	13050461	13050961	CG30457	su(Hw),mod(mdg4),
CHR2R	13149272	13149772	mbl	mod(mdg4),gsb-n,HDAC1,Mef2,gro,z,Trl,CG8478,Dll,HDAC4a,dl,Su(H),tin,sens,brm,HDAC11,
CHR2R	13215764	13216264	CR43661	CG8478,dl,
CHR2R	13223420	13223920	CR43661	z,Trl,dl,
CHR2R	13236993	13237493	tRNA:CR30232	su(Hw),
CHR2R	13283908	13284408	Sip1	dl,
CHR2R	13307469	13307969	l(2)k01209	bap,HDAC1,GATAe,kn,su(Hw),dm,CTCF,zfh1,HDAC4a,Trl,bin,twi,CG8478,Tbp,dl,Lpt,Med,jumu,sens,Sin3A,disco,Mef2,Ubx,HDAC6,prd,cad,HDAC11,D,da,
CHR2R	13345568	13346068	CG14478	sna,bap,HDAC1,N,Mef2,bin,gro,HDAC4a,z,HDAC3,Trl,twi,Tbp,psq,dl,cad,slp1,tin,hb,Lpt,Med,prd,da,
CHR2R	13373333	13373833	NT5E-2	Trl,
CHR2R	13405470	13405970	CG4866	HDAC1,HDAC4a,HDAC3,twi,dl,cad,Med,Sin3A,HDAC6,
CHR2R	13421361	13421861	Patronin	HDAC4a,dl,
CHR2R	13435007	13435507	MESR4	HDAC11,Sin3A,HDAC1,kn,CTCF,dm,HDAC4a,trem,z,tll,Trl,bon,twi,Dll,HDAC3,Tbp,dl,hb,Med,jumu,Mef2,Ubx,HDAC6,prd,da,kni,cnc,
CHR2R	13468182	13468682	Dcr-2	HDAC1,dl,Med,
CHR2R	13473389	13473889	CG14483	mod(mdg4),Su(var)3-9,HDAC1,dm,HDAC3,Tbp,HDAC4a,Med,HDAC6,
CHR2R	135011	135511	IntS3	HP1b,
CHR2R	13512773	13513273	rhi	gro,EcR,
CHR2R	13565773	13566273	Sema-1b	twi,HDAC3,dl,bab1,Med,
CHR2R	13570747	13571247	Sema-1b	sna,Hr78,Sin3A,HDAC1,CTCF,hkb,hth,HDAC4a,trem,z,Trl,twi,sens,Tbp,dl,slp1,hb,Lpt,Med,jumu,disco,HDAC6,D,da,
CHR2R	13603949	13604449	CG6424	sna,CG8478,cnc,HDAC1,Mef2,gro,HDAC4a,z,Trl,twi,yki,Dll,Tbp,dl,cad,Su(H),tin,Lpt,Med,EcR,prd,da,E(z),
CHR2R	13604472	13604972	CG6424	sna,mod(mdg4),cnc,gsb-n,HDAC1,Mef2,CG8478,hkb,gro,HDAC4a,z,pan,Trl,bin,yki,twi,Dll,Tbp,dl,Su(H),tin,Lpt,Med,EcR,prd,insv,da,E(z),
CHR2R	13614129	13614629	CG4975	HDAC1,twi,HDAC3,sens,HDAC4a,dl,Med,Sin3A,HDAC6,D,E(z),
CHR2R	1363631	1364131	CG30440	HP1b,
CHR2R	13709856	13710356	grh	CG8478,mod(mdg4),dm,twi,h,Tbp,dl,Lpt,Med,Mef2,HDAC4a,da,
CHR2R	13734359	13734859	olf186-M	ttk,Trl,
CHR2R	13756244	13756744	Mapmodulin	cnc,HDAC1,N,CG8478,psq,trem,z,Trl,twi,HDAC3,Tbp,dl,hb,Med,Mef2,prd,
CHR2R	13758385	13758885	Mapmodulin	CG8478,lola,HDAC1,N,ttk,zfh1,z,br,Trl,twi,Tbp,psq,dl,slp1,Lpt,Med,jumu,sens,Sin3A,disco,Mef2,Abd-B,da,
CHR2R	13824140	13824640	PpY-55A	-
CHR2R	13872411	13872911	dpr13	su(Hw),
CHR2R	13908772	13909272	CG10910	-
CHR2R	13966709	13967209	CG5757	su(Hw),
CHR2R	14013480	14013980	Spn6	Sin3A,HDAC1,CG8478,dm,HDAC4a,Trl,dl,Med,HDAC6,Mef2,HDAC11,
CHR2R	14029153	14029653	pAbp	CG8478,Hr78,mod(mdg4),gsb-n,HDAC1,N,bcd,hkb,dm,gro,HDAC4a,z,HDAC3,br,Trl,CBP,sc,bon,twi,Tbp,dl,hb,bab1,Med,jumu,sens,Sin3A,disco,HDAC11,CG16778,HDAC6,Mef2,da,E(z),
CHR2R	14035251	14035751	CG17680	Su(var)3-9,gsb-n,HDAC1,HDAC4a,twi,HDAC3,dl,Med,Sin3A,Ubx,HDAC6,
CHR2R	14044023	14044523	lolal	CG8478,HDAC1,N,Mef2,ttk,bcd,gro,HDAC4a,trem,z,Trl,twi,yki,HDAC3,Tbp,dl,Su(H),slp1,tin,Med,jumu,sens,disco,HDAC11,da,E(z),
CHR2R	14054383	14054883	Nup75	mod(mdg4),HDAC1,HDAC3,twi,Tbp,dl,Med,Sin3A,HDAC6,
CHR2R	14083138	14083638	CG33958	dm,CBP,
CHR2R	14113233	14113733	fj	CBP,
CHR2R	14120736	14121236	fj	Su(var)3-9,GATAe,hkb,z,HDAC3,CBP,twi,h,Tbp,dl,Med,cad,disco,fru,da,
CHR2R	14147071	14147571	Ote	CTCF,twi,dl,cad,
CHR2R	14164363	14164863	Ote	mod(mdg4),Sin3A,Su(var)3-9,HDAC1,chinmo,dm,CTCF,HDAC4a,trem,tll,HDAC3,br,h,Tbp,dl,Med,HDAC6,HDAC11,
CHR2R	14192326	14192826	CG14505	sna,Kr,gro,twi,Dll,HDAC4a,dl,hb,Med,cad,HDAC11,da,
CHR2R	14195383	14195883	Tango8	Kr,gro,HDAC4a,pan,twi,Stat92E,HDAC1,dl,hb,Med,cad,HDAC11,da,cnc,
CHR2R	14196990	14197490	Tango8	CG8478,Su(H),gro,Trl,CBP,bon,Stat92E,dl,
CHR2R	14225540	14226040	sbb	gro,eve,hth,Dll,HDAC4a,dl,HDAC11,HDAC1,
CHR2R	14232892	14233392	sbb	sbb,EcR,
CHR2R	14234863	14235363	sbb	-
CHR2R	14237519	14238019	sbb	Su(var)3-9,cad,hth,Su(H),gro,bin,
CHR2R	14244872	14245372	sbb	CG8478,Hr78,mod(mdg4),bap,HDAC11,HDAC1,N,bin,gro,eve,HDAC4a,Dfd,z,tll,Trl,twi,yki,bon,hth,Dll,Tbp,dl,Su(H),tin,hb,Lpt,Med,HDAC6,prd,Eip74EF,cad,Mef2,Abd-B,da,kni,E(z),
CHR2R	14330139	14330639	slim	mod(mdg4),Su(var)3-9,HDAC1,Mef2,ttk,bin,Trl,twi,dl,
CHR2R	14375200	14375700	CG30116	-
CHR2R	14382680	14383180	CG30116	-
CHR2R	14460220	14460720	Rgk2	bin,gro,twi,dl,Med,da,
CHR2R	14500362	14500862	CG10927	HDAC1,ttk,HDAC3,Trl,HDAC4a,dl,HDAC6,
CHR2R	14512218	14512718	Atg7	HDAC1,bin,Trl,sens,HDAC4a,dl,HDAC6,HDAC11,D,E(z),
CHR2R	14551125	14551625	CG33136	hth,gro,
CHR2R	14556042	14556542	CG33136	cnc,HDAC4a,HDAC11,
CHR2R	14577364	14577864	Sik3	CG8478,HDAC1,psq,Trl,bon,HDAC4a,dl,Su(H),brm,Mef2,
CHR2R	14585944	14586444	CG15071	CG8478,Trl,
CHR2R	14611585	14612085	List	-
CHR2R	14693640	14694140	l(2)08717	cnc,N,cad,h,CG8478,gro,Trl,Dll,dl,Su(H),EcR,Abd-B,insv,
CHR2R	14694528	14695028	l(2)08717	cnc,su(Hw),Kr,mod(mdg4),CTCF,dl,bab1,
CHR2R	14721049	14721549	CG15098	CBP,
CHR2R	14742448	14742948	Jheh1	cnc,Su(var)3-9,HDAC4a,sens,HDAC11,pan,
CHR2R	14745194	14745694	Jheh2	cnc,dm,Trl,
CHR2R	14792210	14792710	snoRNA:Me28S-U1130	dl,
CHR2R	14810063	14810563	Vha100-3	sbb,
CHR2R	14828809	14829309	sano	-
CHR2R	14852345	14852845	prod	cnc,
CHR2R	14858377	14858877	prod	HDAC1,hkb,dm,tll,HDAC3,CTCF,h,sens,Tbp,HDAC4a,dl,Med,jumu,Sin3A,cad,disco,HDAC11,HDAC6,
CHR2R	14887471	14887971	snoRNA:abba-a	-
CHR2R	14918634	14919134	5-HT1B	su(Hw),
CHR2R	1493153	1493653	Fis1	HP1b,hkb,HDAC4a,sens,Snr1,HDAC11,
CHR2R	14939433	14939933	CG15116	-
CHR2R	14951521	14952021	5-HT1A	sens,
CHR2R	14954316	14954816	5-HT1A	Trl,
CHR2R	14965239	14965739	5-HT1A	-
CHR2R	15000248	15000748	CG15117	-
CHR2R	15024455	15024955	CG15118	Sin3A,Su(var)3-9,HDAC1,kn,Mef2,CTCF,dm,gro,trem,z,tll,HDAC3,Trl,twi,Tbp,dl,slp1,Med,eve,HDAC11,Ubx,HDAC6,da,E(z),cnc,
CHR2R	15033088	15033588	CR43399	cnc,pan,HDAC1,
CHR2R	15066275	15066775	hppy	HDAC1,CTCF,CG8478,mod(mdg4),dm,gro,HDAC4a,Trl,twi,Tbp,psq,dl,cad,Su(H),Med,Sin3A,HDAC6,HDAC11,Ubx,E(z),
CHR2R	15068695	15069195	hppy	-
CHR2R	15074354	15074854	hppy	-
CHR2R	15109673	15110173	CG7137	-
CHR2R	15117086	15117586	cora	Hr78,HDAC1,N,CG8478,mod(mdg4),gro,z,Trl,yki,bon,Dll,psq,dl,Su(H),E(z),
CHR2R	15145263	15145763	CG7229	sna,hkb,twi,dl,hb,Lpt,Med,disco,D,da,cnc,
CHR2R	15156840	15157340	rib	Trl,CG8478,twi,dl,disco,D,
CHR2R	15157341	15157841	rib	Trl,twi,dl,disco,da,
CHR2R	15182211	15182711	Tab2	cnc,GATAe,Trl,twi,dl,
CHR2R	15211640	15212140	Rgk1	Trl,
CHR2R	15261230	15261730	CG9416	Trl,
CHR2R	15311924	15312424	hts	CG8478,lola,HDAC11,HDAC1,kn,N,eve,hth,dm,gro,zfh1,HDAC4a,trem,z,Trl,yki,twi,Dll,HDAC3,Tbp,dl,Su(H),Med,jumu,Sin3A,Mef2,HDAC6,Eip74EF,cad,CTCF,da,E(z),
CHR2R	15324504	15325004	Fak56D	Su(var)3-9,HDAC1,HDAC3,Trl,twi,Tbp,dl,Med,Sin3A,Mef2,HDAC6,da,E(z),
CHR2R	15337025	15337525	betaTub56D	Su(var)3-9,HDAC1,Mef2,ttk,bin,gro,Trl,twi,hth,h,Tbp,dl,tin,Lpt,Med,da,
CHR2R	15338176	15338676	betaTub56D	mod(mdg4),HDAC1,kn,Mef2,HDAC4a,Trl,twi,sc,CG8478,Tbp,dl,tin,Med,jumu,Sin3A,disco,HDAC6,prd,da,
CHR2R	15341616	15342116	par-1	HDAC3,sens,
CHR2R	15349478	15349978	par-1	mod(mdg4),CTCF,Trl,HDAC3,
CHR2R	15393963	15394463	tRNA:CR30223	Su(var)3-9,
CHR2R	15424340	15424840	sm	-
CHR2R	15464732	15465232	CG42878	-
CHR2R	15503479	15503979	sm	Dll,
CHR2R	15519200	15519700	sm	cnc,Su(var)3-9,gsb-n,HDAC1,Mef2,CG8478,su(Hw),mod(mdg4),eve,CTCF,gro,usp,Trl,yki,Dll,Tbp,dl,Su(H),bab1,Med,twi,HDAC11,
CHR2R	1559093	1559593	kune	Hr78,HDAC1,N,HP1b,CTCF,zfh1,trem,tll,dl,Med,sens,Ubx,HDAC6,Snr1,Eip74EF,HDAC11,
CHR2R	15599789	15600289	Obp56e	-
CHR2R	15603203	15603703	tRNA:CR30215	gsb-n,Trl,
CHR2R	15670282	15670782	Obp56g	-
CHR2R	15711439	15711939	Toll-7	-
CHR2R	15769596	15770096	CG13872	Mef2,CTCF,dl,
CHR2R	15788496	15788996	CG13872	-
CHR2R	1579082	1579582	scaf	su(Hw),CTCF,Trl,Hr39,pan,
CHR2R	158116	158616	IntS3	N,HP1b,Trl,Su(H),
CHR2R	15900449	15900949	CG16898	-
CHR2R	15950437	15950937	18w	eve,twi,HDAC4a,tin,HDAC11,da,cnc,
CHR2R	15959027	15959527	18w	sna,shn,kni,bcd,twi,h,dl,cad,hb,Med,prd,tll,da,
CHR2R	15971220	15971720	18w	sbb,CBP,
CHR2R	15993748	15994248	18w	sna,CG8478,Hr78,Su(var)3-9,Stat92E,HDAC1,kn,N,Mef2,CTCF,lola,bcd,gro,zfh1,HDAC4a,Dfd,sc,Trl,yki,bon,twi,Dll,Tbp,dl,Su(H),tin,hb,Lpt,Med,EcR,prd,Eip74EF,Abd-B,da,kni,
CHR2R	16013537	16014037	18w	gsb-n,bin,gro,HDAC4a,twi,dl,Med,cad,HDAC11,da,
CHR2R	16027069	16027569	CG11041	gro,sens,
CHR2R	16126	16626	CG17683	HP1b,
CHR2R	16147960	16148460	mus209	CBP,HDAC3,
CHR2R	16150158	16150658	mus209	HDAC1,HDAC4a,trem,HDAC3,twi,Tbp,dl,Med,jumu,Sin3A,Ubx,HDAC6,HDAC11,da,
CHR2R	16181085	16181585	Cpr56F	-
CHR2R	16199685	16200185	CG13868	sna,twi,HDAC4a,dl,hb,Med,prd,da,
CHR2R	16200999	16201499	CG13868	Mef2,eve,Trl,dl,hb,prd,
CHR2R	16208544	16209044	CG8920	Trl,
CHR2R	16213702	16214202	MED8	HDAC11,HDAC1,CTCF,HDAC3,sens,dl,Med,Sin3A,Ubx,HDAC6,cad,D,
CHR2R	16214860	16215360	CG8929	sna,cnc,HDAC1,bcd,HDAC4a,HDAC3,Trl,br,twi,Tbp,dl,cad,Med,Sin3A,Ubx,HDAC6,HDAC11,da,
CHR2R	16219872	16220372	CG8929	CTCF,
CHR2R	1622790	1623290	ap	HDAC1,cnc,
CHR2R	16267329	16267829	CG11192	-
CHR2R	16316782	16317282	CG12484	su(Hw),
CHR2R	16364078	16364578	Obp57c	sbb,
CHR2R	16416708	16417208	CG30151	-
CHR2R	16449520	16450020	Mgat1	Su(var)3-9,HDAC1,HDAC4a,HDAC3,Trl,CBP,h,Tbp,dl,Sin3A,HDAC6,CTCF,
CHR2R	16461197	16461697	qsm	chinmo,
CHR2R	16475633	16476133	bl	cnc,HDAC1,CG8478,HDAC4a,z,pan,Trl,CBP,twi,Tbp,psq,dl,cad,Su(H),hb,Med,Sin3A,HDAC6,Mef2,E(z),
CHR2R	16483329	16483829	bl	HDAC4a,Trl,dl,Lpt,Med,HDAC1,
CHR2R	16505916	16506416	CG9945	HDAC1,GATAe,z,HDAC3,Trl,CBP,Tbp,dl,Sin3A,HDAC6,kni,
CHR2R	16510709	16511209	CG16742	sna,Sin3A,HDAC1,dm,z,HDAC3,Trl,twi,Tbp,HDAC4a,dl,Med,HDAC6,HDAC11,da,CTCF,
CHR2R	16520061	16520561	Rcd6	HDAC1,hkb,chinmo,
CHR2R	16553908	16554408	Fem-1	sna,cnc,Su(var)3-9,HDAC1,cad,bin,eve,trem,Trl,CTCF,twi,sens,Tbp,HDAC4a,dl,Med,HDAC11,HDAC6,D,da,
CHR2R	16558426	16558926	CG30152	HDAC1,CTCF,mod(mdg4),HDAC4a,z,HDAC3,Trl,twi,dl,Lpt,Med,Sin3A,Ubx,HDAC6,HDAC11,
CHR2R	16608939	16609439	CG13442	su(Hw),
CHR2R	16626894	16627394	CG13442	su(Hw),
CHR2R	16675156	16675656	CG43666	-
CHR2R	16684384	16684884	CG15225	-
CHR2R	16719438	16719938	sktl	CG8478,mod(mdg4),bap,cnc,HDAC1,CTCF,dm,gro,HDAC4a,z,Trl,yki,twi,Tbp,dl,bab1,Lpt,Med,Sin3A,da,
CHR2R	16727022	16727522	insc	su(Hw),Trl,dl,EcR,Mef2,da,
CHR2R	16757622	16758122	IM14	HDAC1,HDAC4a,twi,dl,bab1,Sin3A,Ubx,HDAC6,
CHR2R	16801582	16802082	Rx	CG8478,HDAC1,N,gro,HDAC4a,Dfd,Trl,yki,hth,Dll,dl,Med,Eip74EF,da,
CHR2R	16830761	16831261	Act57B	bap,Mef2,Dfd,bin,CTCF,Trl,twi,dl,Lpt,Med,da,
CHR2R	16883881	16884381	CG10543	CG8478,Hr78,cnc,Su(var)3-9,HDAC1,GATAe,N,Mef2,psq,hkb,mod(mdg4),bin,eve,gro,zfh1,HDAC4a,Dfd,z,tll,Trl,CTCF,twi,yki,HDAC3,Tbp,dl,Su(H),tin,hb,Lpt,Med,jumu,Sin3A,disco,HDAC6,Eip74EF,cad,HDAC11,Abd-B,da,lola,
CHR2R	16899204	16899704	CG9346	Su(var)3-9,HDAC1,z,HDAC3,Tbp,dl,Sin3A,HDAC6,HDAC11,D,E(z),CTCF,
CHR2R	16912583	16913083	CG9350	HDAC1,zfh1,HDAC4a,HDAC3,Trl,sens,dl,Med,Ubx,HDAC6,CTCF,
CHR2R	16914462	16914962	CG9350	-
CHR2R	16921054	16921554	CG9350	eve,pan,CBP,twi,
CHR2R	16926334	16926834	CG9350	pan,dl,HDAC11,da,HDAC1,
CHR2R	16926898	16927398	CG9350	gro,HDAC4a,pan,dl,HDAC11,da,HDAC1,
CHR2R	16932122	16932622	shg	hth,dl,
CHR2R	16933203	16933703	shg	dl,sens,
CHR2R	1696166	1696666	dpr12	twi,dl,hb,
CHR2R	1700661	1701161	dpr12	-
CHR2R	17015840	17016340	mago	Su(var)3-9,HDAC1,su(Hw),hkb,dm,HDAC4a,HDAC3,Trl,yki,twi,Dll,sens,Tbp,dl,Med,Sin3A,HDAC6,HDAC11,da,E(z),
CHR2R	17022172	17022672	mago	bin,twi,dl,da,
CHR2R	17033069	17033569	CG9418	cnc,HDAC1,HDAC3,HDAC4a,HDAC6,
CHR2R	1704605	1705105	dpr12	CBP,
CHR2R	17088499	17088999	Glycogenin	HDAC1,Mef2,CG8478,su(Hw),Trl,twi,psq,dl,Su(H),da,
CHR2R	17089242	17089742	Glycogenin	HDAC1,Mef2,Trl,CTCF,twi,psq,dl,Su(H),da,
CHR2R	17091614	17092114	Glycogenin	Trl,
CHR2R	17093035	17093535	Glycogenin	-
CHR2R	17116908	17117408	ASPP	su(Hw),sbb,dl,
CHR2R	17124316	17124816	ASPP	CTCF,twi,su(Hw),
CHR2R	17133287	17133787	ASPP	dl,prd,
CHR2R	17136363	17136863	ASPP	sna,CG8478,Su(var)3-9,CTCF,gro,tll,Trl,twi,HDAC4a,HDAC1,dl,EcR,hb,Lpt,Med,HDAC11,da,
CHR2R	17137310	17137810	ASPP	sna,Su(var)3-9,HDAC1,gro,twi,Dll,HDAC4a,dl,hb,Med,sens,disco,prd,da,E(z),
CHR2R	17142583	17143083	Rgk3	sbb,bin,
CHR2R	17169955	17170455	MFS16	sna,HDAC1,GATAe,CTCF,HDAC4a,HDAC3,pan,Trl,twi,Tbp,dl,Med,jumu,sens,Sin3A,disco,HDAC6,prd,HDAC11,da,
CHR2R	1719271	1719771	dpr12	-
CHR2R	17218565	17219065	snoRNA:Me28S-A2589c	HDAC3,
CHR2R	17261236	17261736	cv-2	-
CHR2R	17262285	17262785	cv-2	-
CHR2R	1727525	1728025	dpr12	-
CHR2R	17291323	17291823	Sdc	-
CHR2R	1732349	1732849	CR44125	chinmo,cad,
CHR2R	1733368	1733868	CR44125	-
CHR2R	17389207	17389707	MESK2	cnc,Sin3A,Su(var)3-9,HDAC1,GATAe,kn,N,CTCF,CG8478,hkb,eve,dm,zfh1,HDAC4a,trem,Dfd,z,tll,Trl,CBP,twi,HDAC3,Tbp,dl,Hr39,pan,Lpt,Med,disco,HDAC11,Ubx,HDAC6,D,da,kni,
CHR2R	17394	17894	CG17683	HP1b,
CHR2R	17394558	17395058	MESK2	CTCF,CBP,CG8478,
CHR2R	17410324	17410824	Egfr	sna,HDAC1,GATAe,mod(mdg4),CTCF,trem,twi,HDAC3,Tbp,dl,hb,Med,sens,disco,D,da,
CHR2R	17414497	17414997	Egfr	GATAe,twi,HDAC4a,dl,tin,disco,HDAC11,da,
CHR2R	17417665	17418165	CG30286	twi,dl,tin,
CHR2R	17434615	17435115	Egfr	sna,HDAC1,bcd,CG8478,HDAC3,Trl,twi,dl,Med,da,
CHR2R	17455325	17455825	CG10440	da,
CHR2R	17459531	17460031	CG10440	Pcl,Trl,twi,su(Hw),dl,
CHR2R	17527414	17527914	CG10321	-
CHR2R	17550354	17550854	pirk	Trl,
CHR2R	17578808	17579308	Ppcdc	HDAC11,HDAC1,mod(mdg4),dm,HDAC4a,trem,HDAC3,Trl,twi,Tbp,dl,slp1,Med,Sin3A,Ubx,HDAC6,CTCF,da,
CHR2R	17590213	17590713	HmgZ	CG8478,cnc,HDAC11,HDAC1,N,CTCF,h,bcd,Dfd,gro,HDAC4a,z,usp,Trl,twi,Tbp,dl,hb,Lpt,Med,eve,disco,Mef2,fru,HDAC6,prd,D,en,insv,da,kni,
CHR2R	17599060	17599560	CG30403	CTCF,Trl,CBP,twi,psq,dl,hb,Med,prd,da,HDAC1,
CHR2R	17600502	17601002	HmgD	lola,Su(var)3-9,HDAC1,kn,bcd,psq,gro,HDAC4a,z,pan,Trl,yki,twi,Dll,Tbp,dl,Su(H),hb,Med,Sin3A,HDAC6,da,Mef2,
CHR2R	17607827	17608327	LBR	Su(var)3-9,HDAC1,ttk,dm,CTCF,HDAC4a,HDAC3,Trl,br,yki,h,Tbp,dl,Su(H),Med,jumu,Sin3A,disco,HDAC6,HDAC11,da,
CHR2R	17621406	17621906	LBR	HDAC1,dm,gro,Trl,Dll,HDAC11,HDAC6,en,
CHR2R	17636613	17637113	Grx-1	-
CHR2R	17659113	17659613	CG4021	twi,slp1,
CHR2R	17673843	17674343	lox2	-
CHR2R	17735421	17735921	tRNA:CR30406	Su(var)3-9,Mef2,HDAC1,
CHR2R	17771340	17771840	Fili	bap,Su(var)3-9,HDAC1,Kr,bin,gro,eve,tll,pan,Trl,CG8478,twi,hth,HDAC4a,dl,slp1,tin,Lpt,Mef2,HDAC11,da,E(z),
CHR2R	17858906	17859406	CG34029	CTCF,CBP,
CHR2R	17883999	17884499	CG30401	bap,
CHR2R	17939937	17940437	CG13500	su(Hw),
CHR2R	17966996	17967496	synj	HDAC1,mod(mdg4),HDAC4a,Trl,twi,dl,Sin3A,da,
CHR2R	17987568	17988068	CG11073	dl,
CHR2R	1803341	1803841	CR44126	sbb,
CHR2R	18042533	18043033	CG34206	cad,da,
CHR2R	18070470	18070970	MED16	Su(var)3-9,HDAC1,ttk,HP1b,bin,chinmo,dm,Trl,twi,HDAC3,Tbp,HDAC4a,dl,slp1,Med,Sin3A,HDAC6,CTCF,HDAC11,
CHR2R	18079665	18080165	Swim	-
CHR2R	18090101	18090601	Swim	hkb,CBP,jumu,D,
CHR2R	18211817	18212317	Gp150	twi,dl,Med,sens,prd,D,
CHR2R	18217295	18217795	pgc	HDAC3,
CHR2R	18251053	18251553	Liprin-gamma	Dfd,CTCF,jumu,
CHR2R	18271539	18272039	CG13506	eve,HDAC4a,Trl,bin,HDAC11,
CHR2R	18272672	18273172	CG13506	-
CHR2R	182740	183240	IntS3	HP1b,
CHR2R	18287230	18287730	babos	gro,twi,Dll,HDAC4a,dl,
CHR2R	18290591	18291091	CG6044	HDAC1,HDAC4a,Trl,yki,twi,Tbp,dl,bab1,Med,prd,da,
CHR2R	18373107	18373607	CG4554	HDAC3,
CHR2R	18389363	18389863	CG4610	Dfd,
CHR2R	18426603	18427103	px	lola,HDAC3,cad,
CHR2R	18429558	18430058	px	cnc,HDAC1,gro,hth,bon,cad,
CHR2R	18434113	18434613	px	CG8478,N,su(Hw),bin,gro,Pcl,Trl,dl,
CHR2R	18441336	18441836	CG6018	Hr78,gro,CTCF,
CHR2R	18455959	18456459	CG11362	su(Hw),Trl,
CHR2R	18457281	18457781	CG11362	Hr78,Su(var)3-9,gsb-n,HDAC1,gro,Trl,yki,bon,Dll,Tbp,dl,Su(H),
CHR2R	18489514	18490014	CG4269	CBP,HDAC3,
CHR2R	18525020	18525520	bonsai	HDAC1,GATAe,hkb,HDAC4a,HDAC3,CBP,twi,sens,Tbp,dl,bab1,Med,jumu,Sin3A,disco,HDAC6,D,da,
CHR2R	18533656	18534156	CG2852	mod(mdg4),cnc,HDAC1,CTCF,HDAC4a,pan,hth,Tbp,dl,tin,Med,Sin3A,
CHR2R	18548415	18548915	CG42565	Mef2,
CHR2R	18564297	18564797	RYBP	CG8478,Hr78,HDAC1,N,chinmo,gro,HDAC4a,Trl,bon,dl,Lpt,HDAC11,HDAC6,
CHR2R	18568301	18568801	ppa	sna,hkb,gro,z,Trl,twi,psq,dl,Lpt,Med,Mef2,D,da,
CHR2R	18573384	18573884	ppa	CG8478,Hr78,cnc,Su(var)3-9,gsb-n,HDAC1,kn,N,Mef2,bin,Su(H),dm,gro,HDAC4a,Trl,yki,twi,Stat92E,h,Dll,Tbp,psq,dl,tin,Lpt,Med,HDAC11,HDAC6,prd,da,
CHR2R	18574014	18574514	ppa	CG8478,cnc,HDAC11,Su(var)3-9,gsb-n,Hr78,HDAC1,N,Mef2,ttk,bin,Su(H),dm,gro,HDAC4a,HDAC3,Trl,yki,twi,Tbp,psq,dl,tin,Lpt,Med,CG16778,fru,HDAC6,prd,da,E(z),
CHR2R	1861639	1862139	BubR1	HDAC1,HP1b,mod(mdg4),dm,HDAC3,dl,Med,Sin3A,HDAC6,CTCF,HDAC11,
CHR2R	18630905	18631405	jbug	Trl,su(Hw),dl,
CHR2R	18639324	18639824	CG13526	-
CHR2R	18640402	18640902	CG13526	-
CHR2R	18642233	18642733	CG13526	-
CHR2R	18669445	18669945	CG30270	-
CHR2R	1869126	1869626	Src42A	HDAC1,kn,N,HP1b,z,Trl,Tbp,dl,Med,disco,HDAC11,
CHR2R	18776179	18776679	Gmer	HDAC11,HDAC1,dm,HDAC3,Tbp,HDAC4a,dl,Med,Sin3A,HDAC6,cnc,
CHR2R	1881299	1881799	Src42A	Trl,sens,
CHR2R	18817303	18817803	CG42678	HDAC3,
CHR2R	18829799	18830299	CG42694	CBP,
CHR2R	18856865	18857365	CG32834	su(Hw),
CHR2R	18904849	18905349	CG9896	-
CHR2R	18910499	18910999	CG42741	-
CHR2R	18935727	18936227	twi	chinmo,Pcl,HDAC4a,twi,dl,
CHR2R	18939515	18940015	CG30194	twi,dl,bin,gro,Mef2,
CHR2R	18949912	18950412	l(2)06496	Su(var)3-9,HDAC1,mod(mdg4),HDAC4a,HDAC3,dl,Sin3A,HDAC6,HDAC11,CTCF,
CHR2R	18974688	18975188	CG13538	-
CHR2R	19019823	19020323	CG3215	-
CHR2R	19101421	19101921	LS2	-
CHR2R	19113854	19114354	CG3092	dl,
CHR2R	19117540	19118040	CG3092	hth,HDAC4a,sens,
CHR2R	19241759	19242259	CG30409	HDAC1,HDAC4a,twi,dl,Med,disco,HDAC6,HDAC11,da,
CHR2R	19243602	19244102	CG3500	HDAC1,ttk,chinmo,HDAC3,twi,HDAC4a,dl,Med,
CHR2R	19245845	19246345	CG34423	ttk,HDAC3,HDAC4a,dl,
CHR2R	19254296	19254796	Ice1	Hr78,Stat92E,HDAC1,N,ttk,HP1b,HDAC4a,trem,Dfd,z,tll,Trl,twi,HDAC3,Tbp,dl,Med,Sin3A,HDAC11,Ubx,HDAC6,Snr1,Eip74EF,CTCF,Abd-B,da,lola,
CHR2R	19266214	19266714	yellow-d	chinmo,
CHR2R	19270476	19270976	CG13551	Hr78,HDAC11,HDAC1,N,ttk,HP1b,CTCF,HDAC4a,trem,Dfd,bin,dl,jumu,Sin3A,HDAC6,Snr1,Eip74EF,Abd-B,D,lola,
CHR2R	19273725	19274225	CG30415	HDAC11,HDAC1,mod(mdg4),HDAC4a,trem,HDAC3,Trl,twi,sens,dl,hb,Med,Sin3A,HDAC6,D,E(z),CTCF,
CHR2R	19375268	19375768	CR43793	sbb,su(Hw),
CHR2R	19410920	19411420	RabX1	cnc,HDAC11,Sin3A,HDAC1,kn,Mef2,su(Hw),dm,gro,HDAC4a,z,tll,br,twi,h,HDAC3,Tbp,dl,Med,Ubx,HDAC6,cad,da,kni,
CHR2R	19417133	19417633	mi	-
CHR2R	19424420	19424920	bw	sna,chinmo,
CHR2R	19435341	19435841	wmd	HDAC1,HDAC4a,trem,tll,HDAC3,Tbp,dl,HDAC11,Med,jumu,Sin3A,HDAC6,D,
CHR2R	19452390	19452890	apt	Su(var)3-9,HDAC1,CTCF,chinmo,HDAC4a,Trl,twi,dl,HDAC11,HDAC6,da,E(z),
CHR2R	19454411	19454911	apt	su(Hw),chinmo,
CHR2R	19458461	19458961	apt	Kr,dl,tin,da,HDAC1,
CHR2R	19467933	19468433	apt	Su(var)3-9,HDAC1,Mef2,CG8478,su(Hw),gro,HDAC4a,z,pan,Trl,yki,bon,twi,Dll,Tbp,dl,cad,Su(H),hb,Lpt,Med,sens,disco,D,da,
CHR2R	19480960	19481460	apt	bap,HDAC1,bin,CBP,HDAC4a,dl,tin,hb,HDAC11,brm,
CHR2R	19545884	19546384	Pde8	HDAC1,su(Hw),Trl,twi,dl,Med,
CHR2R	19546608	19547108	Pde8	mod(mdg4),Su(var)3-9,HDAC1,dm,gro,Trl,yki,bon,twi,Dll,dl,Su(H),Med,
CHR2R	19573037	19573537	CG11293	CTCF,
CHR2R	19585335	19585835	mRpL43	HDAC11,HDAC1,psq,dm,HDAC4a,tll,HDAC3,Trl,br,twi,Tbp,dl,hb,Med,Sin3A,Ubx,HDAC6,prd,CTCF,
CHR2R	19589928	19590428	l(2)dtl	HDAC1,CTCF,HDAC4a,HDAC3,Trl,twi,sens,Tbp,dl,Med,jumu,Sin3A,HDAC6,prd,da,
CHR2R	19608720	19609220	CG18128	bin,
CHR2R	196707	197207	IntS3	HP1b,
CHR2R	19677258	19677758	CG15800	-
CHR2R	19681288	19681788	CG15800	sbb,
CHR2R	19683449	19683949	CG9850	Trl,
CHR2R	19689365	19689865	CG30177	sens,
CHR2R	19705286	19705786	CG4797	cnc,mod(mdg4),CTCF,Trl,brm,
CHR2R	19730515	19731015	shu	HDAC3,kni,
CHR2R	19732275	19732775	CG5554	HDAC1,dm,tll,HDAC3,Tbp,dl,Sin3A,HDAC11,HDAC6,da,
CHR2R	19752654	19753154	CG4585	CG8478,HDAC11,Sin3A,HDAC1,GATAe,N,Ubx,mod(mdg4),HDAC4a,CBP,HDAC3,Tbp,dl,Med,jumu,HDAC6,D,
CHR2R	19755884	19756384	Thiolase	HDAC1,HP1b,chinmo,HDAC4a,twi,dl,HDAC6,prd,cad,HDAC11,ftz,da,E(z),
CHR2R	19760448	19760948	ken	cnc,CG8478,chinmo,gro,Trl,bin,HDAC4a,dl,HDAC11,kni,
CHR2R	19777622	19778122	Dcp1	HDAC1,HDAC4a,HDAC3,Tbp,dl,slp1,Med,Sin3A,HDAC6,CTCF,HDAC11,E(z),
CHR2R	19801595	19802095	kcc	-
CHR2R	19809013	19809513	CG2812	-
CHR2R	19866085	19866585	Sox14	CG8478,Hr78,lola,bap,cnc,HDAC11,Su(var)3-9,gsb-n,HDAC1,GATAe,N,Mef2,h,hkb,su(Hw),bin,gro,zfh1,HDAC4a,Dfd,tll,Trl,twi,yki,sc,Dll,sens,Tbp,dl,EcR,Su(H),Lpt,Med,jumu,Sin3A,eve,disco,HDAC3,usp,Ubx,fru,HDAC6,Eip74EF,en,D,da,E(z),
CHR2R	19868796	19869296	Sox14	HDAC1,dl,sens,EcR,
CHR2R	19925202	19925702	IntS1	Su(var)3-9,HDAC1,HDAC3,HDAC4a,dl,Med,Sin3A,HDAC6,HDAC11,
CHR2R	19933618	19934118	tsr	cnc,HDAC1,Mef2,bin,zfh1,HDAC4a,CBP,twi,Tbp,dl,hb,Med,Sin3A,HDAC6,cad,HDAC11,da,
CHR2R	19945547	19946047	eIF-5A	Hr78,cnc,HDAC1,N,CG8478,dm,trem,CTCF,CBP,twi,HDAC3,Tbp,dl,Med,Sin3A,HDAC11,Ubx,HDAC6,prd,Mef2,D,
CHR2R	19971005	19971505	CG16786	-
CHR2R	19973754	19974254	snama	HDAC1,kn,dm,HDAC4a,trem,twi,HDAC3,Tbp,dl,Med,Sin3A,HDAC11,Ubx,HDAC6,D,
CHR2R	19982978	19983478	gek	HDAC3,sens,
CHR2R	20017686	20018186	tamo	-
CHR2R	20034540	20035040	Dat	Trl,
CHR2R	20041840	20042340	DnaJ-60	hkb,
CHR2R	20046543	20047043	DnaJ-60	Hr78,cnc,HDAC1,GATAe,Mef2,CTCF,Ubx,HDAC4a,trem,HDAC3,Trl,dl,Med,jumu,sens,Sin3A,HDAC6,HDAC11,D,
CHR2R	20064819	20065319	snoRNA:Psi18S-1820	HDAC3,
CHR2R	20071853	20072353	snoRNA:Me28S-G1083a	z,
CHR2R	20075098	20075598	CG3363	cnc,HDAC1,ttk,HP1b,bin,dm,trem,br,twi,h,HDAC3,Tbp,dl,slp1,hb,Med,Mef2,HDAC6,CTCF,da,E(z),
CHR2R	2007866	2008366	EcR	sna,Hr78,Su(var)3-9,HDAC1,N,CG8478,gro,HDAC4a,usp,Trl,bin,yki,twi,Dll,Tbp,dl,EcR,Su(H),hb,Lpt,Med,sens,disco,prd,da,
CHR2R	20127903	20128403	nord	chinmo,gro,Dll,
CHR2R	20139502	20140002	Ir60a	-
CHR2R	20154745	20155245	CG13577	su(Hw),chinmo,
CHR2R	20194722	20195222	betaTub60D	Trl,
CHR2R	2020812	2021312	EcR	CG8478,Hr78,mod(mdg4),bap,HDAC1,GATAe,N,Mef2,psq,hkb,bin,gro,zfh1,HDAC4a,z,Trl,twi,yki,bon,hth,Dll,Tbp,dl,Su(H),tin,Lpt,Med,sens,disco,EcR,Eip74EF,CTCF,HDAC11,da,
CHR2R	20222255	20222755	slbo	chinmo,Trl,Dll,dl,
CHR2R	20254135	20254635	tRNA:N5:60C	chinmo,
CHR2R	20274573	20275073	mAcR-60C	su(Hw),
CHR2R	20286711	20287211	Mov34	chinmo,HDAC3,
CHR2R	20299095	20299595	CG3419	HDAC1,HDAC4a,HDAC3,dl,Med,Sin3A,HDAC6,HDAC11,E(z),
CHR2R	2031819	2032319	tRNA:K2:42Ae	cad,pan,CG8478,dl,EcR,usp,
CHR2R	2034346	2034846	tRNA:K2:42Ae	Trl,twi,dl,
CHR2R	20345634	20346134	CG13579	chinmo,
CHR2R	2035359	2035859	tRNA:N5:42Ah	Trl,twi,dl,hb,usp,da,
CHR2R	20391415	20391915	Pros28.1B	-
CHR2R	20413596	20414096	Brca2	HDAC11,HDAC1,CTCF,hkb,dm,HDAC4a,Trl,twi,HDAC3,Tbp,dl,Med,jumu,Sin3A,Mef2,HDAC6,D,
CHR2R	20430864	20431364	itp	sna,mod(mdg4),Su(var)3-9,HDAC1,kn,N,CG8478,Trl,twi,Tbp,dl,Su(H),hb,Med,prd,da,cnc,
CHR2R	20431957	20432457	itp	sna,HDAC1,mod(mdg4),twi,dl,Med,sens,da,
CHR2R	20436692	20437192	itp	su(Hw),
CHR2R	20439597	20440097	CG4622	chinmo,su(Hw),
CHR2R	20441850	20442350	CG4622	su(Hw),
CHR2R	20448970	20449470	CG11414	HDAC1,ttk,dm,HDAC4a,HDAC3,Tbp,dl,Med,Sin3A,HDAC6,
CHR2R	20458905	20459405	CG3511	HDAC11,Su(var)3-9,HDAC1,GATAe,Kr,dm,ttk,HDAC4a,HDAC3,Trl,dl,Med,jumu,Sin3A,Ubx,HDAC6,CTCF,D,
CHR2R	20487069	20487569	CG4692	Sin3A,HDAC1,CTCF,dm,HDAC3,Trl,Tbp,dl,HDAC11,Med,Mef2,HDAC6,
CHR2R	20535191	20535691	CG4781	-
CHR2R	20542286	20542786	CG3663	-
CHR2R	20551665	20552165	CG3683	sna,HDAC11,HDAC1,bcd,mod(mdg4),HDAC4a,HDAC3,twi,dl,hb,Med,Sin3A,Ubx,HDAC6,da,
CHR2R	20560553	20561053	Pof	sens,
CHR2R	20572421	20572921	Mmp1	h,gro,CTCF,Trl,bon,Stat92E,Dll,
CHR2R	20650412	20650912	CG3894	HDAC11,Su(var)3-9,HDAC1,CTCF,HDAC3,Trl,twi,h,sens,Tbp,HDAC4a,dl,Med,Sin3A,HDAC6,da,
CHR2R	20655518	20656018	GstE12	CG8478,Hr78,HDAC1,N,cad,gro,CTCF,HDAC3,Trl,CBP,yki,Dll,dl,Su(H),Abd-B,lola,
CHR2R	20662533	20663033	Eps-15	HDAC11,Su(var)3-9,HDAC1,HDAC4a,HDAC3,Trl,dl,Sin3A,HDAC6,
CHR2R	20668195	20668695	Eap	HDAC1,GATAe,dm,HDAC4a,HDAC3,sens,Tbp,dl,Sin3A,HDAC6,D,
CHR2R	20679528	20680028	Reg-5	ttk,chinmo,
CHR2R	2078162	2078662	tRNA:N5:42Ad	gsb-n,CBP,twi,dl,Mef2,
CHR2R	20804912	20805412	pain	Dfd,chinmo,HDAC3,Hr39,cad,
CHR2R	20813918	20814418	pain	-
CHR2R	20831737	20832237	CG15861	chinmo,gro,Trl,CBP,Su(H),
CHR2R	20835774	20836274	CG2790	mod(mdg4),HDAC11,HDAC1,N,CTCF,su(Hw),hkb,dm,HDAC4a,Trl,twi,HDAC3,Tbp,dl,Med,jumu,sens,Sin3A,disco,HDAC6,D,da,
CHR2R	20850778	20851278	CG2765	HDAC1,Trl,bon,dl,
CHR2R	20894558	20895058	zip	bap,Mef2,CBP,dl,sens,
CHR2R	20898418	20898918	zip	mod(mdg4),HDAC11,Su(var)3-9,Stat92E,HDAC1,CTCF,bcd,zfh1,HDAC4a,z,HDAC3,Trl,CBP,twi,Tbp,psq,dl,hb,bab1,Med,sens,Sin3A,eve,Mef2,HDAC6,prd,D,Ubx,da,E(z),
CHR2R	20910202	20910702	Nplp1	sens,twi,tin,
CHR2R	21002877	21003377	CG30430	HDAC1,Mef2,CG8478,HDAC4a,z,Trl,dl,
CHR2R	2101491	2101991	l(2)k14710	Sin3A,HDAC1,ttk,dm,HDAC4a,z,CTCF,Trl,twi,HDAC3,sens,Tbp,dl,slp1,Med,Ubx,HDAC6,da,Mef2,E(z),
CHR2R	2108743	2109243	bin3	bap,Su(var)3-9,gsb-n,HDAC1,N,CG8478,eve,zfh1,HDAC4a,trem,Trl,twi,Tbp,dl,Lpt,Med,HDAC11,HDAC6,prd,Snr1,cad,Mef2,D,da,
CHR2R	21145820	21146320	CG9380	-
CHR2R	2154694	2155194	Pld	-
CHR2R	218159	218659	IntS3	HP1b,sbb,
CHR2R	2186145	2186645	Pld	-
CHR2R	2199729	2200229	Pld	-
CHR2R	2217745	2218245	Pld	-
CHR2R	2224889	2225389	Pld	-
CHR2R	2278500	2279000	jing	-
CHR2R	22798	23298	CG17683	HP1b,HDAC4a,
CHR2R	2286088	2286588	jing	su(Hw),mod(mdg4),CTCF,Trl,CBP,
CHR2R	232309	232809	IntS3	HP1b,
CHR2R	2336023	2336523	jing	-
CHR2R	2347645	2348145	jing	-
CHR2R	2357492	2357992	jing	-
CHR2R	2386282	2386782	jing	-
CHR2R	2405752	2406252	CR43905	sna,Su(H),Trl,dl,Med,EcR,da,
CHR2R	2425012	2425512	CR43905	cnc,chinmo,pan,
CHR2R	2458593	2459093	CG15233	dl,
CHR2R	2481465	2481965	CG15233	HDAC1,HDAC4a,twi,dl,hb,Lpt,Med,sens,da,
CHR2R	2515588	2516088	CG33919	cnc,Su(var)3-9,cad,hkb,gro,Trl,yki,CG8478,twi,Dll,HDAC3,HDAC1,dl,Su(H),Med,jumu,sens,da,
CHR2R	2518904	2519404	Vha16-1	cnc,HDAC1,N,ttk,CG8478,gro,z,Trl,yki,twi,Dll,Tbp,dl,Su(H),tin,hb,Med,sens,fru,prd,Snr1,cad,da,Mef2,
CHR2R	2519783	2520283	Vha16-1	CG8478,Hr78,cnc,HDAC11,gsb-n,HDAC1,N,Mef2,dm,gro,zfh1,HDAC4a,Dfd,z,Trl,twi,yki,sc,Dll,Tbp,dl,Su(H),tin,hb,Med,Sin3A,CG16778,fru,HDAC6,prd,Snr1,da,lola,
CHR2R	2550511	2551011	Adf1	CG8478,Hr78,HDAC11,Su(var)3-9,HDAC1,Mef2,cad,Dfd,bin,gro,CTCF,HDAC4a,tll,br,yki,sc,twi,h,Tbp,dl,EcR,Lpt,Med,Sin3A,eve,brm,CG16778,usp,fru,HDAC6,prd,da,E(z),
CHR2R	2555224	2555724	CG15908	gsb-n,HDAC1,dm,HDAC3,CTCF,Tbp,dl,Med,Ubx,HDAC6,HDAC11,
CHR2R	2584143	2584643	Rab2	cnc,HDAC1,CTCF,dm,HDAC3,Trl,twi,h,Tbp,dl,Med,sens,Sin3A,Mef2,HDAC6,prd,
CHR2R	2599626	2600126	CG3409	HDAC1,Mef2,HDAC4a,Trl,twi,Tbp,dl,Med,HDAC11,da,
CHR2R	2627791	2628291	l(2)01289	CTCF,bin,Trl,
CHR2R	2629218	2629718	phtf	mod(mdg4),Su(var)3-9,HDAC1,Mef2,CTCF,hkb,su(Hw),bin,HDAC4a,trem,Trl,twi,sens,dl,slp1,Med,Sin3A,Ubx,HDAC6,HDAC3,da,
CHR2R	2637083	2637583	Eb1	HDAC1,GATAe,N,Mef2,CG8478,z,Trl,twi,HDAC3,Tbp,dl,Med,jumu,sens,Sin3A,disco,D,da,
CHR2R	2637616	2638116	Eb1	HDAC1,Mef2,z,twi,Trl,HDAC3,dl,Med,sens,disco,da,
CHR2R	2638143	2638643	Eb1	z,usp,twi,HDAC3,dl,da,HDAC1,
CHR2R	2644352	2644852	CG3420	Sin3A,HDAC1,hkb,CTCF,HDAC4a,trem,HDAC3,Trl,twi,Tbp,dl,Med,sens,HDAC6,HDAC11,Ubx,E(z),
CHR2R	2696938	2697438	CG15237	HDAC1,ttk,HDAC3,CTCF,CBP,dl,sens,HDAC6,cad,HDAC11,
CHR2R	2699735	2700235	koi	HDAC1,Mef2,ttk,bin,HDAC4a,HDAC3,twi,dl,sens,
CHR2R	2732480	2732980	CG9445	-
CHR2R	2759519	2760019	coro	CG8478,Hr78,HDAC11,Su(var)3-9,HDAC1,N,Mef2,bin,gro,HDAC4a,trem,z,Trl,CTCF,yki,twi,h,Dll,sens,Tbp,dl,Su(H),slp1,hb,Lpt,Med,jumu,Sin3A,disco,fru,HDAC6,prd,Eip74EF,Abd-B,D,en,da,E(z),
CHR2R	2760033	2760533	coro	CG8478,Hr78,HDAC11,Sin3A,Su(var)3-9,HDAC1,N,Mef2,dm,gro,HDAC4a,trem,z,tll,Trl,CTCF,yki,twi,Dll,sens,Tbp,hkb,dl,cad,Su(H),slp1,hb,Lpt,Med,jumu,disco,Ubx,fru,HDAC6,Abd-B,D,da,kni,E(z),
CHR2R	2802054	2802554	CG3358	su(Hw),Hr39,
CHR2R	2873037	2873537	vimar	Sin3A,Su(var)3-9,HDAC1,GATAe,bin,dm,CTCF,HDAC4a,z,Trl,twi,Tbp,dl,Med,sens,Mef2,HDAC3,Ubx,HDAC6,prd,cad,HDAC11,da,kni,
CHR2R	2878390	2878890	Tsp42Ea	-
CHR2R	2902513	2903013	Tsp42Ee	cnc,twi,dl,
CHR2R	2912539	2913039	Tsp42Ef	CG8478,gro,CTCF,Trl,twi,dl,Su(H),sens,kni,
CHR2R	2936432	2936932	lbm	CTCF,Trl,dl,
CHR2R	2936958	2937458	lbm	CTCF,gro,Trl,yki,Dll,dl,Su(H),
CHR2R	2976192	2976692	esn	sbb,dm,gro,Tbp,
CHR2R	2983725	2984225	esn	hkb,su(Hw),cad,
CHR2R	3032417	3032917	Spn43Aa	gro,Dll,
CHR2R	3053723	3054223	pk	chinmo,twi,
CHR2R	3088461	3088961	pk	-
CHR2R	3143598	3144098	CG1850	cad,Trl,Mef2,
CHR2R	322159	322659	Gprk1	-
CHR2R	322722	323222	Gprk1	-
CHR2R	3266536	3267036	Dscam	sna,twi,dl,tin,da,cnc,
CHR2R	3319233	3319733	CG11145	chinmo,
CHR2R	3345061	3345561	Inos	gsb-n,gro,Trl,CTCF,bin,twi,HDAC4a,dl,Su(H),Med,pan,HDAC3,HDAC6,Mef2,HDAC11,da,
CHR2R	3376084	3376584	wech	gsb-n,HDAC1,Mef2,CG8478,hkb,mod(mdg4),bin,pan,gro,HDAC4a,z,tll,Trl,CTCF,yki,twi,Dll,Tbp,dl,Su(H),tin,hb,Lpt,Med,Sin3A,disco,HDAC11,CG16778,prd,da,E(z),
CHR2R	3380322	3380822	Coop	Su(var)3-9,HDAC1,ttk,HDAC4a,Trl,twi,psq,dl,Lpt,Med,jumu,disco,HDAC11,prd,da,
CHR2R	3383459	3383959	CG1620	Su(var)3-9,ttk,chinmo,HDAC3,HDAC1,dl,hb,Sin3A,HDAC6,HDAC11,
CHR2R	3406684	3407184	CG2144	HDAC1,ttk,HDAC3,Dfd,HDAC4a,dl,HDAC6,HDAC11,
CHR2R	3413005	3413505	Orc1	HDAC1,bin,CTCF,HDAC4a,trem,Trl,HDAC3,dl,slp1,Med,Sin3A,HDAC6,
CHR2R	3454026	3454526	boca	HDAC11,Sin3A,Su(var)3-9,HDAC1,ttk,bin,br,twi,yki,Trl,HDAC3,HDAC4a,dl,Med,sens,HDAC6,Mef2,D,da,
CHR2R	3477380	3477880	scra	mod(mdg4),HDAC1,dm,HDAC3,br,Trl,twi,Tbp,HDAC4a,dl,bin,Med,Sin3A,HDAC6,HDAC11,D,da,CTCF,
CHR2R	3513814	3514314	CG43340	chinmo,gro,
CHR2R	3550942	3551442	CG2065	cnc,Trl,
CHR2R	3561409	3561909	mRpL52	HDAC11,HDAC1,HDAC4a,HDAC3,br,Tbp,dl,tin,hb,Med,sens,Sin3A,HDAC6,
CHR2R	3563363	3563863	U2A	mod(mdg4),HDAC1,chinmo,dm,z,HDAC3,Trl,CBP,sens,dl,Med,Sin3A,HDAC6,E(z),
CHR2R	3568932	3569432	CG1399	Trl,HDAC3,Su(H),
CHR2R	3581621	3582121	CG1399	cad,gro,bin,Trl,
CHR2R	3586836	3587336	CG30496	CG8478,HDAC1,GATAe,ttk,su(Hw),dm,CTCF,HDAC4a,z,Trl,Tbp,dl,Med,sens,Sin3A,HDAC11,Ubx,HDAC6,E(z),
CHR2R	3632833	3633333	CG30497	Hr78,gsb-n,Mef2,CG8478,z,Trl,yki,Dll,dl,Su(H),lola,
CHR2R	3693467	3693967	Nop17l	Hr78,mod(mdg4),bap,HDAC11,Su(var)3-9,HDAC1,N,CG8478,dm,CTCF,HDAC4a,z,Trl,twi,Tbp,dl,Med,sens,Sin3A,HDAC6,da,E(z),
CHR2R	3699788	3700288	CG1882	mod(mdg4),cnc,Sin3A,HDAC1,su(Hw),dm,CTCF,HDAC4a,Trl,CBP,HDAC3,sens,Tbp,dl,slp1,Med,HDAC11,Ubx,HDAC6,
CHR2R	37602	38102	CG17683	-
CHR2R	3870814	3871314	ACC	chinmo,Trl,dl,
CHR2R	3871544	3872044	ACC	N,chinmo,gro,Trl,yki,dl,
CHR2R	3872459	3872959	ACC	su(Hw),
CHR2R	3876463	3876963	Nup44A	Su(var)3-9,HDAC1,CTCF,su(Hw),mod(mdg4),Trl,bin,twi,sens,Tbp,dl,slp1,Med,jumu,Sin3A,EcR,Ubx,fru,HDAC6,prd,D,da,E(z),
CHR2R	3883951	3884451	Dic3	-
CHR2R	3956184	3956684	lig	sna,CG8478,Hr78,HDAC1,N,psq,hkb,mod(mdg4),dm,CTCF,gro,z,tll,HDAC3,Trl,br,usp,bon,twi,sens,Tbp,dl,EcR,slp1,hb,Med,jumu,Sin3A,disco,prd,da,E(z),
CHR2R	3993970	3994470	CG18316	HDAC1,GATAe,ttk,hkb,HDAC4a,HDAC3,Tbp,dl,Med,Sin3A,HDAC6,
CHR2R	4019350	4019850	Pabp2	HDAC1,hkb,mod(mdg4),HDAC3,Trl,br,CTCF,CG8478,Stat92E,Tbp,dl,Med,jumu,kni,
CHR2R	4032826	4033326	Lpin	sna,cnc,HDAC1,eve,gro,Trl,twi,HDAC3,psq,dl,Med,sens,da,
CHR2R	4039618	4040118	kermit	Trl,dl,Su(H),HDAC1,
CHR2R	4062393	4062893	LRP1	CG8478,Su(var)3-9,HDAC1,Mef2,ttk,bin,gro,z,pan,Trl,twi,h,Dll,Tbp,dl,EcR,slp1,Hr39,hb,tin,Lpt,Med,usp,da,
CHR2R	4070488	4070988	LRP1	-
CHR2R	4118388	4118888	dpn	Su(H),gro,z,pan,h,HDAC4a,dl,Med,sens,
CHR2R	4125090	4125590	pnut	CG8478,Hr78,bap,Su(var)3-9,HDAC1,N,Mef2,CTCF,ttk,gro,HDAC4a,z,Trl,twi,yki,h,Tbp,dl,Su(H),tin,Lpt,Med,sens,Sin3A,prd,tll,HDAC11,da,
CHR2R	4129397	4129897	pnut	gsb-n,N,pan,gro,z,Trl,bin,twi,HDAC1,dl,Su(H),Lpt,Med,sens,HDAC11,cad,da,E(z),
CHR2R	4130014	4130514	pnut	gsb-n,pan,gro,z,Trl,twi,HDAC1,dl,Med,sens,cad,HDAC11,da,E(z),
CHR2R	4190782	4191282	pdm3	su(Hw),
CHR2R	4195563	4196063	pdm3	-
CHR2R	4214352	4214852	pdm3	CG8478,mod(mdg4),Su(H),Su(var)3-9,gro,Pcl,z,Trl,yki,twi,Stat92E,h,Dll,Tbp,dl,Lpt,Med,HDAC4a,insv,da,CTCF,
CHR2R	4236385	4236885	CG11635	-
CHR2R	427852	428352	Stlk	HP1b,
CHR2R	430722	431222	Stlk	HP1b,
CHR2R	4356642	4357142	Mal-A7	-
CHR2R	440440	440940	Stlk	HP1b,
CHR2R	441721	442221	Stlk	HP1b,
CHR2R	4430674	4431174	CG12780	CTCF,
CHR2R	448257	448757	Stlk	HP1b,
CHR2R	4485708	4486208	CG8735	cnc,HDAC3,
CHR2R	4492845	4493345	rgr	bin,su(Hw),Mef2,
CHR2R	4495408	4495908	CG8642	twi,dl,EcR,da,
CHR2R	4519985	4520485	CG8635	CG8478,CTCF,trem,Trl,HDAC4a,dl,bab1,
CHR2R	4522728	4523228	CG8635	gro,hth,CBP,twi,slp1,
CHR2R	453340	453840	Stlk	HP1b,
CHR2R	4534888	4535388	ptc	cnc,HDAC1,CG8478,su(Hw),hth,gro,Trl,CBP,yki,bon,Dll,dl,Su(H),insv,
CHR2R	4536387	4536887	ptc	cnc,HDAC1,N,CG8478,dm,gro,Trl,twi,yki,Dll,Tbp,hkb,dl,Su(H),Med,HDAC11,en,insv,da,
CHR2R	4538877	4539377	ptc	HDAC11,Kr,gro,Trl,h,HDAC3,HDAC1,dl,bab1,
CHR2R	4539991	4540491	ptc	HDAC1,gro,Trl,CTCF,twi,HDAC3,HDAC4a,dl,bab1,HDAC11,
CHR2R	4544537	4545037	ptc	sna,shn,Mef2,bcd,bin,twi,hth,dl,cad,hb,Med,prd,en,da,
CHR2R	4553331	4553831	Acsl	Hr78,HDAC1,N,CG8478,mod(mdg4),CTCF,gro,HDAC4a,trem,Trl,yki,twi,Dll,dl,Su(H),bab1,Med,sens,Sin3A,
CHR2R	4555000	4555500	Acsl	HDAC1,kn,gro,Trl,CBP,yki,twi,Tbp,dl,Lpt,Med,Mef2,HDAC11,da,
CHR2R	4556291	4556791	Acsl	mod(mdg4),HDAC11,Hr78,HDAC1,kn,Mef2,CG8478,gro,eve,HDAC4a,z,Trl,yki,twi,Dll,Tbp,dl,Su(H),slp1,Med,
CHR2R	456078	456578	Stlk	HP1b,
CHR2R	4609450	4609950	CG30357	cad,Trl,HDAC3,dl,sens,
CHR2R	4712608	4713108	CG30350	su(Hw),
CHR2R	4750085	4750585	Rya-r44F	bap,HDAC1,Mef2,su(Hw),bin,gro,HDAC4a,Trl,yki,twi,Dll,dl,slp1,tin,Lpt,Med,fru,prd,D,da,
CHR2R	47572	48072	CG40127	HP1b,
CHR2R	4788658	4789158	Ggamma1	HDAC1,ttk,hkb,HDAC4a,HDAC3,twi,Tbp,dl,Med,jumu,Sin3A,HDAC6,HDAC11,D,E(z),
CHR2R	4794121	4794621	CG8258	cnc,Sin3A,HDAC1,ttk,CTCF,trem,HDAC3,pan,twi,Tbp,dl,hb,Med,HDAC11,Ubx,HDAC6,cad,
CHR2R	480348	480848	p120ctn	HP1b,
CHR2R	4809973	4810473	CG8247	HDAC11,HDAC1,Ubx,CTCF,ttk,HDAC3,twi,sens,Tbp,HDAC4a,dl,Med,Sin3A,HDAC6,da,
CHR2R	4835958	4836458	CG8230	chinmo,HDAC3,
CHR2R	4866489	4866989	CG8213	Trl,dl,
CHR2R	4874293	4874793	CG8213	-
CHR2R	4919907	4920407	CG8170	-
CHR2R	4954583	4955083	ana	CTCF,
CHR2R	4975083	4975583	Dbp45A	HDAC1,HDAC3,Tbp,HDAC4a,dl,Med,Sin3A,HDAC6,HDAC11,
CHR2R	5018033	5018533	CG18659	HDAC1,ttk,dl,Med,
CHR2R	5031119	5031619	shrb	HDAC1,HDAC4a,trem,HDAC3,Tbp,dl,Med,Sin3A,disco,HDAC6,D,E(z),
CHR2R	5032424	5032924	CG30344	cnc,HDAC11,HDAC1,ttk,HDAC4a,trem,Trl,CBP,twi,HDAC3,dl,Med,jumu,sens,Sin3A,Ubx,HDAC6,D,
CHR2R	5063434	5063934	Rme-8	HDAC3,HDAC4a,HDAC1,
CHR2R	5077212	5077712	CG8026	cnc,E(z),
CHR2R	5078941	5079441	CG8026	HDAC1,GATAe,ttk,HDAC4a,Trl,twi,dl,sens,HDAC6,HDAC11,
CHR2R	509869	510369	CR44101	HP1b,Trl,
CHR2R	5136938	5137438	CG30343	-
CHR2R	519566	520066	CR44101	HP1b,
CHR2R	5277177	5277677	l(2)03659	gro,Trl,yki,E(z),HDAC1,
CHR2R	529336	529836	CR44101	HP1b,
CHR2R	5302631	5303131	wun2	Su(var)3-9,Trl,twi,dl,slp1,Med,da,
CHR2R	5315243	5315743	Pdk	CBP,dl,
CHR2R	5323041	5323541	ced-6	HDAC3,
CHR2R	5338558	5339058	CG33758	su(Hw),
CHR2R	5380852	5381352	Wnt2	HDAC1,twi,Dll,Tbp,dl,Med,sens,
CHR2R	5382185	5382685	Wnt2	hth,h,dl,sens,en,
CHR2R	540731	541231	CG17883	-
CHR2R	5431088	5431588	CG1888	eve,bin,Trl,dl,Mef2,
CHR2R	5439988	5440488	CR43651	Hr78,mod(mdg4),HDAC1,GATAe,N,Mef2,CG8478,dm,HDAC4a,z,Trl,bin,twi,HDAC3,Tbp,dl,disco,HDAC6,E(z),
CHR2R	5452432	5452932	CG1809	mod(mdg4),su(Hw),Trl,CG8478,HDAC4a,dl,Mef2,Abd-B,
CHR2R	5465852	5466352	Not1	CG8478,cnc,HDAC1,mod(mdg4),dm,CTCF,trem,Trl,bon,twi,Tbp,dl,hb,tin,Med,sens,Sin3A,Ubx,D,da,E(z),
CHR2R	5579444	5579944	Uba1	CG8478,cnc,HDAC11,gsb-n,HDAC1,psq,mod(mdg4),dm,CTCF,HDAC4a,z,tll,br,Trl,twi,HDAC3,Tbp,dl,hb,Med,jumu,sens,Sin3A,disco,Mef2,fru,HDAC6,prd,D,insv,da,E(z),
CHR2R	5613935	5614435	dap	su(Hw),
CHR2R	5624979	5625479	sqa	su(Hw),
CHR2R	5629793	5630293	sqa	-
CHR2R	5638356	5638856	CheA46a	Mef2,su(Hw),mod(mdg4),bin,
CHR2R	5661653	5662153	CG1690	sbb,
CHR2R	566698	567198	CG17883	HP1b,
CHR2R	5667384	5667884	CG1698	-
CHR2R	574012	574512	CG17883	-
CHR2R	5752880	5753380	Ntmt	HDAC1,GATAe,CTCF,hkb,su(Hw),HDAC3,sens,Tbp,HDAC4a,dl,jumu,Sin3A,disco,Ubx,HDAC6,D,
CHR2R	5760694	5761194	cbx	twi,tin,hb,sens,
CHR2R	5778759	5779259	CG1513	Su(var)3-9,HDAC1,ttk,CTCF,HDAC4a,trem,HDAC3,Trl,sens,Tbp,dl,HDAC11,Med,jumu,Sin3A,HDAC6,D,Ubx,kni,E(z),
CHR2R	5825687	5826187	Mef2	bap,Mef2,bin,Trl,twi,hth,dl,Lpt,da,
CHR2R	5836921	5837421	Mef2	cnc,eve,gro,Trl,yki,bon,dl,Su(H),su(Hw),HDAC4a,
CHR2R	5842378	5842878	Mef2	mod(mdg4),Su(var)3-9,HDAC1,gro,Trl,yki,bon,twi,Dll,Tbp,psq,dl,Su(H),Lpt,Med,EcR,insv,da,
CHR2R	5847138	5847638	CG15863	HDAC1,hkb,su(Hw),eve,CTCF,HDAC4a,tll,usp,Trl,twi,HDAC3,Dfd,Tbp,dl,slp1,tin,Med,sens,Sin3A,Mef2,HDAC11,Ubx,HDAC6,prd,D,da,E(z),
CHR2R	5870388	5870888	CR43948	kni,chinmo,Trl,twi,dl,slp1,hb,prd,
CHR2R	5876444	5876944	TER94	mod(mdg4),cnc,HDAC1,GATAe,kn,CTCF,su(Hw),HP1b,hkb,dm,HDAC4a,z,Trl,Tbp,dl,bab1,Med,jumu,Sin3A,EcR,HDAC6,
CHR2R	5887302	5887802	TER94	Pcl,
CHR2R	5907217	5907717	Pka-R2	-
CHR2R	5932831	5933331	CG34220	cnc,eve,Trl,CG8478,psq,
CHR2R	5934281	5934781	oys	GATAe,twi,dl,hb,Med,sens,prd,D,HDAC1,
CHR2R	5942687	5943187	Def	HDAC1,shn,hkb,gro,twi,hth,HDAC4a,dl,Lpt,Med,sens,HDAC11,D,da,
CHR2R	5947043	5947543	magu	cad,da,
CHR2R	5953794	5954294	CG2292	HDAC11,Su(var)3-9,HDAC1,dm,HDAC4a,trem,HDAC3,CBP,twi,Tbp,dl,Med,Sin3A,Ubx,HDAC6,
CHR2R	5954310	5954810	mRpL42	HDAC11,Su(var)3-9,HDAC1,dm,HDAC4a,trem,HDAC3,CBP,twi,Tbp,dl,Med,Sin3A,Ubx,HDAC6,
CHR2R	5955829	5956329	cdc2rk	mod(mdg4),HDAC1,GATAe,hkb,HDAC4a,HDAC3,Med,sens,HDAC6,
CHR2R	5984661	5985161	Jra	HDAC1,GATAe,kn,ttk,mod(mdg4),chinmo,CTCF,HDAC4a,HDAC3,Trl,CBP,sens,Tbp,dl,Med,jumu,Sin3A,HDAC6,D,Ubx,cnc,
CHR2R	5986930	5987430	14-3-3zeta	sna,mod(mdg4),Su(var)3-9,HDAC1,dm,CTCF,HDAC4a,z,HDAC3,Trl,CBP,twi,Tbp,dl,HDAC11,Med,jumu,Sin3A,HDAC6,Ubx,da,
CHR2R	5988677	5989177	14-3-3zeta	Hr78,HDAC1,N,Mef2,CG8478,mod(mdg4),dm,gro,HDAC4a,Trl,yki,twi,h,Dll,Tbp,psq,dl,Su(H),Med,Abd-B,da,cnc,
CHR2R	5990945	5991445	14-3-3zeta	Mef2,Trl,dl,
CHR2R	6004909	6005409	CG11866	Hr78,lola,HDAC1,N,CTCF,HP1b,HDAC4a,trem,Dfd,z,tll,HDAC3,dl,Med,jumu,Sin3A,Stat92E,HDAC11,Ubx,HDAC6,Eip74EF,Mef2,Abd-B,
CHR2R	6011734	6012234	gem	sna,Hr78,lola,cnc,gsb-n,HDAC1,GATAe,N,Mef2,CG8478,hkb,mod(mdg4),bin,dm,gro,HDAC4a,trem,Trl,yki,twi,Dll,Tbp,dl,Su(H),Lpt,Med,jumu,sens,Sin3A,disco,HDAC6,CTCF,D,da,E(z),
CHR2R	6015472	6015972	gem	bin,Trl,dl,
CHR2R	6043519	6044019	KCNQ	cad,CTCF,Trl,bon,
CHR2R	6090671	6091171	CG34221	-
CHR2R	6098517	6099017	Hr46	CG8478,Hr78,gsb-n,HDAC1,N,Kr,hth,gro,z,usp,Trl,yki,twi,h,Dll,Tbp,dl,EcR,Su(H),Lpt,HDAC11,Abd-B,da,E(z),
CHR2R	6115274	6115774	Hr46	Su(var)3-9,N,gro,Trl,usp,yki,bon,Dll,psq,dl,EcR,Su(H),Hr39,pan,insv,
CHR2R	6197075	6197575	JhI-1	Sin3A,HDAC1,dm,HDAC4a,tll,br,Trl,twi,Tbp,dl,Med,HDAC11,Ubx,HDAC6,CTCF,da,
CHR2R	620482	620982	CR41440	HP1b,
CHR2R	62257	62757	CG40127	-
CHR2R	625874	626374	CG17082	HP1b,
CHR2R	6317259	6317759	RanBPM	CG8478,Hr78,mod(mdg4),cnc,HDAC1,kn,N,Mef2,psq,bin,dm,gro,zfh1,Dfd,z,tll,Trl,br,twi,yki,Dll,Tbp,dl,Su(H),slp1,tin,hb,Lpt,Med,Sin3A,Eip74EF,Abd-B,da,lola,
CHR2R	6317793	6318293	RanBPM	CG8478,Hr78,cnc,HDAC1,N,Mef2,mod(mdg4),bin,gro,zfh1,z,HDAC3,Trl,twi,yki,Dll,Tbp,psq,dl,Su(H),slp1,tin,Lpt,Med,Sin3A,Eip74EF,Abd-B,insv,da,
CHR2R	6355973	6356473	CG11777	sna,HDAC11,HDAC1,CTCF,bin,HDAC4a,trem,HDAC3,pan,Trl,twi,sens,Tbp,dl,slp1,Med,jumu,Sin3A,HDAC6,
CHR2R	6365297	6365797	whd	cnc,HDAC1,Kr,mod(mdg4),pan,gro,HDAC4a,Trl,bin,yki,Dll,psq,dl,Su(H),Med,disco,
CHR2R	6403795	6404295	lola	usp,
CHR2R	6409897	6410397	lola	Trl,dl,disco,
CHR2R	6421286	6421786	lola	HDAC1,Mef2,ttk,mod(mdg4),bin,zfh1,HDAC4a,z,HDAC3,Trl,CBP,twi,Tbp,dl,Su(H),hb,Med,prd,da,
CHR2R	6422456	6422956	lola	sna,CG8478,bap,HDAC1,Mef2,CTCF,bcd,mod(mdg4),hth,gro,zfh1,HDAC4a,z,Trl,bin,twi,yki,Stat92E,Dll,Tbp,dl,Su(H),tin,hb,Lpt,Med,disco,prd,cad,HDAC11,da,E(z),
CHR2R	6423563	6424063	snoRNA:lola-a	bap,HDAC1,bcd,Trl,twi,yki,Tbp,HDAC4a,dl,tin,hb,Lpt,Med,sens,Mef2,prd,HDAC11,da,E(z),
CHR2R	6425498	6425998	snoRNA:lola-d	Mef2,gro,Trl,twi,dl,hb,Lpt,da,
CHR2R	6432172	6432672	lola	HDAC11,HDAC1,Mef2,psq,mod(mdg4),eve,HDAC4a,Trl,dl,HDAC6,
CHR2R	6432689	6433189	lola	HDAC1,Mef2,mod(mdg4),Trl,HDAC4a,dl,
CHR2R	6456060	6456560	psq	CG8478,N,psq,gro,z,Trl,dl,su(Hw),HDAC11,Abd-B,
CHR2R	6488128	6488628	CG11883	Trl,CG8478,dl,Hr39,
CHR2R	6488962	6489462	CG11883	CG8478,gro,dl,
CHR2R	6505064	6505564	CG11883	eve,Trl,CG8478,HDAC3,dl,Su(H),Mef2,
CHR2R	6508474	6508974	CG11883	-
CHR2R	6538367	6538867	CG12934	-
CHR2R	6558901	6559401	stan	su(Hw),sens,
CHR2R	6621756	6622256	CG7220	cnc,cad,su(Hw),bin,
CHR2R	6623983	6624483	CG7220	cad,ttk,HDAC3,
CHR2R	6639468	6639968	CR43605	-
CHR2R	666502	667002	CR43281	-
CHR2R	6692201	6692701	wde	trem,Trl,twi,HDAC3,dl,Med,sens,
CHR2R	6698393	6698893	mms4	HDAC11,HDAC1,CTCF,dm,HDAC4a,trem,HDAC3,Trl,twi,sens,Tbp,dl,Med,Sin3A,HDAC6,E(z),
CHR2R	671007	671507	CR43281	HDAC1,ttk,HP1b,CTCF,HDAC3,sens,D,
CHR2R	67442	67942	CG40127	HP1b,
CHR2R	6748604	6749104	CG30015	cnc,HDAC1,CG8478,hkb,dm,Trl,HDAC4a,dl,cad,bab1,sens,HDAC6,
CHR2R	675079	675579	CG12547	HDAC1,HP1b,HDAC3,
CHR2R	6761490	6761990	CG30015	Su(var)3-9,HDAC1,GATAe,HDAC4a,z,CTCF,Trl,twi,Tbp,dl,Med,Sin3A,disco,prd,HDAC11,da,
CHR2R	6786230	6786730	Rpb5	mod(mdg4),HDAC1,CTCF,dm,HDAC4a,HDAC3,Trl,twi,sens,Tbp,dl,cad,Med,Sin3A,Mef2,HDAC6,E(z),
CHR2R	6835107	6835607	Spn47C	su(Hw),hb,
CHR2R	6866942	6867442	Spn47C	-
CHR2R	6931540	6932040	CG43188	pan,twi,cad,
CHR2R	6933588	6934088	CG43188	bin,
CHR2R	6934913	6935413	CG43188	-
CHR2R	6948401	6948901	CG43188	gro,
CHR2R	6983540	6984040	CG43189	bin,eve,twi,
CHR2R	702533	703033	CG17528	HP1b,HDAC3,
CHR2R	7068156	7068656	shn	gro,HDAC4a,
CHR2R	7073134	7073634	shn	cnc,eve,HDAC3,Trl,bon,dl,Su(H),HDAC6,Mef2,HDAC1,
CHR2R	7074721	7075221	shn	cnc,Trl,twi,dl,
CHR2R	7079572	7080072	shn	sna,shn,bcd,HDAC4a,Trl,twi,dl,cad,Mad,hb,Med,prd,tll,da,
CHR2R	7087289	7087789	shn	sna,bap,Stat92E,HDAC1,shn,Mef2,Kr,bcd,bin,gro,pan,Trl,twi,dl,slp1,tin,Mad,hb,Lpt,Med,sens,prd,tll,cad,HDAC11,ftz,da,
CHR2R	7090081	7090581	shn	Hr78,cnc,gsb-n,HDAC1,Mef2,psq,dm,gro,z,Trl,CBP,CG8478,bon,Stat92E,Dll,Tbp,dl,Su(H),tin,Lpt,HDAC11,HDAC6,twi,E(z),
CHR2R	7090812	7091312	shn	Hr78,cnc,HDAC1,N,CG8478,psq,pan,Su(H),dm,gro,z,Trl,CBP,bon,Dll,Tbp,dl,HDAC11,HDAC6,Mef2,Abd-B,E(z),
CHR2R	71184	71684	CG40127	HP1b,
CHR2R	712102	712602	CG17528	HP1b,h,
CHR2R	7121776	7122276	CG13228	Trl,
CHR2R	7167040	7167540	Vhl	Sin3A,Su(var)3-9,HDAC1,ttk,HDAC4a,trem,HDAC3,CBP,twi,sens,Tbp,dl,slp1,Med,HDAC6,HDAC11,D,da,E(z),
CHR2R	720576	721076	CG14464	HP1b,
CHR2R	7251925	7252425	CG13204	CG8478,N,h,chinmo,gro,Trl,CTCF,bon,twi,dl,Su(H),Hr39,insv,
CHR2R	7254292	7254792	CG13204	HDAC1,CG8478,gro,Trl,CBP,yki,twi,Dll,dl,Su(H),Lpt,Med,en,da,
CHR2R	7258110	7258610	Tapdelta	Su(var)3-9,HDAC1,ttk,chinmo,HDAC3,Tbp,dl,HDAC11,HDAC6,CTCF,
CHR2R	728729	729229	CG14464	HP1b,
CHR2R	730071	730571	CG14464	HP1b,
CHR2R	7339654	7340154	E(Pc)	mod(mdg4),HDAC11,Su(var)3-9,HDAC1,kn,CTCF,dm,ttk,HDAC4a,HDAC3,twi,Tbp,dl,cad,slp1,hb,Med,jumu,Sin3A,Ubx,HDAC6,D,da,kni,E(z),
CHR2R	7362408	7362908	inv	CG8478,HDAC1,GATAe,gro,Pcl,HDAC4a,tll,Trl,twi,yki,hth,Dll,Tbp,dl,hb,Med,sens,disco,en,da,
CHR2R	7370363	7370863	inv	hth,en,
CHR2R	7390866	7391366	en	gro,
CHR2R	7487358	7487858	tou	HDAC1,CG8478,zfh1,tll,Trl,HDAC4a,dl,HDAC11,D,
CHR2R	7490646	7491146	tou	CG8478,Su(var)3-9,HDAC1,kn,N,Mef2,Kr,CTCF,cnc,hth,gro,zfh1,pan,Trl,CBP,yki,sc,bon,twi,Stat92E,h,Dll,psq,dl,Su(H),hb,tin,Lpt,Med,cad,da,
CHR2R	7501564	7502064	tou	HDAC1,CG8478,CTCF,pan,Trl,twi,Tbp,psq,dl,Lpt,Med,EcR,HDAC11,
CHR2R	7506034	7506534	Egm	Su(var)3-9,HDAC1,HDAC4a,Trl,HDAC3,Tbp,dl,Sin3A,HDAC6,
CHR2R	751070	751570	CG14464	-
CHR2R	7513930	7514430	CG9005	HDAC1,Mef2,CTCF,gro,HDAC4a,Trl,br,bin,yki,twi,Tbp,dl,Su(H),Med,HDAC11,da,
CHR2R	751705	752205	CG14464	-
CHR2R	7519894	7520394	CG9005	HDAC1,Mef2,bin,eve,CTCF,zfh1,HDAC4a,z,Trl,twi,Tbp,dl,slp1,tin,hb,Med,prd,cad,da,
CHR2R	7520525	7521025	CG9005	Hr78,HDAC1,N,Mef2,CG8478,bin,gro,zfh1,z,usp,Trl,twi,Tbp,dl,Su(H),slp1,tin,hb,Lpt,Med,prd,Eip74EF,CTCF,D,da,
CHR2R	7524191	7524691	CG9005	gro,Trl,usp,yki,twi,dl,EcR,Su(H),da,HDAC1,
CHR2R	7528190	7528690	CG9005	sna,HDAC1,mod(mdg4),Trl,HDAC3,Tbp,dl,hb,Med,Sin3A,usp,Ubx,HDAC6,cad,HDAC11,da,
CHR2R	753071	753571	CG14464	-
CHR2R	7538471	7538971	CG9003	lola,HDAC1,CG8478,CTCF,gro,trem,z,pan,Trl,Mef2,twi,Tbp,psq,dl,hb,Med,Sin3A,disco,Ubx,HDAC6,prd,cad,HDAC11,D,E(z),
CHR2R	7543296	7543796	CG13198	su(Hw),Trl,
CHR2R	75438	75938	CG40127	Hr78,N,CTCF,h,HP1b,eve,dm,trem,Dfd,yki,Tbp,Sin3A,HDAC11,Eip74EF,Abd-B,lola,
CHR2R	7551242	7551742	Tret1-1	cnc,Trl,
CHR2R	755545	756045	CG14464	-
CHR2R	7600198	7600698	pyr	HDAC1,twi,dl,Med,cad,
CHR2R	7638868	7639368	CG13193	-
CHR2R	7644050	7644550	CG13193	Trl,su(Hw),dl,
CHR2R	7677295	7677795	ths	HDAC4a,Trl,twi,h,dl,Med,Mef2,da,
CHR2R	76839	77339	CG40127	ttk,HP1b,Trl,
CHR2R	7689458	7689958	ths	-
CHR2R	7691555	7692055	ths	su(Hw),
CHR2R	7693394	7693894	ths	-
CHR2R	7717738	7718238	CG13192	-
CHR2R	7778051	7778551	ERp60	cnc,HDAC1,psq,dm,HDAC4a,Dfd,Tbp,dl,Sin3A,HDAC6,Snr1,HDAC11,kni,E(z),
CHR2R	7780175	7780675	snoRNA:Me28S-A1322	cnc,Su(var)3-9,gsb-n,HDAC1,N,CG8478,hkb,dm,gro,HDAC4a,z,sc,HDAC3,Trl,yki,twi,Dll,Tbp,dl,Med,Sin3A,EcR,HDAC6,prd,HDAC11,D,da,E(z),
CHR2R	7786711	7787211	CG13189	Su(var)3-9,HDAC1,HDAC4a,HDAC3,Tbp,dl,Med,Sin3A,HDAC6,
CHR2R	7791026	7791526	MCPH1	mod(mdg4),cnc,Su(var)3-9,HDAC1,dm,HDAC4a,HDAC3,Tbp,dl,Sin3A,HDAC6,
CHR2R	7903106	7903606	otk	h,gro,HDAC4a,Dll,HDAC1,HDAC3,HDAC11,da,cnc,
CHR2R	7915231	7915731	pds5	HDAC11,HDAC1,GATAe,kn,bcd,hkb,mod(mdg4),dm,CTCF,HDAC4a,tll,Trl,CBP,twi,Dll,HDAC3,Tbp,dl,Med,jumu,sens,Sin3A,eve,Ubx,HDAC6,D,da,E(z),
CHR2R	8026080	8026580	CG18343	sna,HDAC11,HDAC1,CTCF,HP1b,mod(mdg4),HDAC4a,trem,dl,bab1,HDAC6,
CHR2R	8030439	8030939	CG13178	chinmo,HDAC3,
CHR2R	8037759	8038259	Hen1	Su(var)3-9,HDAC1,N,eve,trem,br,CTCF,twi,HDAC3,Tbp,psq,dl,Med,Sin3A,Ubx,HDAC6,
CHR2R	8055948	8056448	SmD3	mod(mdg4),HDAC11,Su(var)3-9,HDAC1,cad,psq,dm,HDAC4a,HDAC3,Trl,twi,h,Tbp,dl,hb,Med,Sin3A,HDAC6,da,
CHR2R	8062391	8062891	Cct5	gsb-n,HDAC1,dm,HDAC4a,trem,twi,HDAC3,Tbp,dl,Med,Sin3A,Ubx,HDAC6,CTCF,HDAC11,
CHR2R	806395	806895	CG44102	HP1b,
CHR2R	8148862	8149362	CR43900	mod(mdg4),HDAC1,psq,hkb,Su(H),dm,gro,z,Trl,yki,Dll,Tbp,dl,hb,prd,Mef2,Abd-B,E(z),
CHR2R	8151700	8152200	Cam	-
CHR2R	8160675	8161175	CG42700	bap,Mef2,CTCF,pan,
CHR2R	8174835	8175335	CG42700	-
CHR2R	8231335	8231835	CG8839	HDAC1,GATAe,N,ttk,mod(mdg4),eve,CTCF,HDAC4a,z,Tbp,dl,HDAC11,Med,jumu,sens,Sin3A,disco,Mef2,HDAC6,D,
CHR2R	8269266	8269766	CG8501	CTCF,
CHR2R	830645	831145	Ir41a	-
CHR2R	8310976	8311476	CG8520	sna,HDAC1,HDAC4a,HDAC3,twi,dl,HDAC11,Med,Sin3A,Ubx,HDAC6,prd,CTCF,
CHR2R	8332646	8333146	CG30334	su(Hw),mod(mdg4),chinmo,HDAC4a,
CHR2R	8394544	8395044	fdl	HDAC1,GATAe,mod(mdg4),pan,dm,CTCF,trem,tll,Trl,HDAC4a,dl,hb,Med,Sin3A,disco,Ubx,HDAC6,HDAC11,D,da,Mef2,
CHR2R	840661	841161	Ir41a	HP1b,
CHR2R	8420126	8420626	fra	twi,dl,EcR,slp1,tin,da,Mef2,
CHR2R	8475628	8476128	Sin3A	CG8478,Hr78,HDAC1,kn,N,Mef2,psq,bin,gro,zfh1,trem,z,Trl,CBP,twi,yki,Dll,HDAC3,Tbp,dl,Su(H),tin,hb,Lpt,Med,Sin3A,prd,Abd-B,da,lola,
CHR2R	8476697	8477197	CR30055	sna,bap,cnc,HDAC11,HDAC1,kn,N,Mef2,bcd,CG8478,bin,gro,zfh1,HDAC4a,trem,z,Trl,twi,yki,Dll,Tbp,psq,dl,cad,Su(H),tin,hb,Lpt,Med,Sin3A,Ubx,HDAC6,prd,CTCF,da,
CHR2R	8606276	8606776	CG42663	sna,Dll,
CHR2R	8628452	8628952	mos	CTCF,gro,CBP,
CHR2R	8630170	8630670	mos	HDAC1,CTCF,eve,gro,Trl,twi,Dll,HDAC4a,dl,sens,HDAC11,da,
CHR2R	8643682	8644182	Taz	mod(mdg4),HDAC11,Sin3A,HDAC1,CTCF,Ubx,dm,HDAC4a,trem,Trl,twi,HDAC3,Tbp,dl,bab1,Med,jumu,sens,HDAC6,Eip74EF,cad,
CHR2R	8644849	8645349	Dgkepsilon	sna,HDAC11,HDAC1,GATAe,su(Hw),Ubx,mod(mdg4),CTCF,HDAC4a,HDAC3,Trl,CBP,twi,sens,Tbp,dl,Med,jumu,Sin3A,disco,HDAC6,
CHR2R	868241	868741	CG44104	HP1b,
CHR2R	8749713	8750213	CG17574	-
CHR2R	8754830	8755330	CG17574	-
CHR2R	8767569	8768069	Aats-asp	Sin3A,Su(var)3-9,HDAC1,kn,dm,CTCF,trem,z,tll,Trl,twi,HDAC3,Tbp,dl,Med,sens,usp,Ubx,HDAC6,cad,HDAC11,da,E(z),
CHR2R	8772235	8772735	vg	HDAC11,HDAC1,CG8478,hkb,Pcl,HDAC4a,Trl,twi,Dll,dl,hb,bab1,Med,HDAC6,prd,da,
CHR2R	8776781	8777281	vg	sens,da,
CHR2R	8797375	8797875	NAT1	HDAC4a,HDAC11,
CHR2R	8811138	8811638	CG13319	cnc,HDAC1,Mef2,zfh1,HDAC4a,z,HDAC3,CBP,HDAC6,
CHR2R	881911	882411	CG44104	-
CHR2R	8844734	8845234	CG13321	HDAC1,ttk,HDAC4a,twi,dl,tin,hb,Lpt,Med,sens,Mef2,prd,cad,HDAC11,da,
CHR2R	8867177	8867677	Psc	bap,Su(var)3-9,HDAC1,Mef2,bcd,CG8478,psq,bin,gro,HDAC4a,z,sc,pan,Trl,twi,Tbp,dl,cad,tin,hb,Lpt,Med,sens,prd,D,da,
CHR2R	8868301	8868801	Psc	CG8478,bap,HDAC1,N,Mef2,bcd,bin,gro,HDAC4a,z,pan,Trl,twi,yki,h,Dll,Tbp,psq,dl,cad,Su(H),slp1,tin,Mad,hb,Lpt,Med,fru,prd,tll,D,da,
CHR2R	8872919	8873419	Psc	HDAC1,shn,kn,Mef2,bcd,psq,bin,gro,HDAC4a,z,Trl,CTCF,twi,yki,h,Dll,Tbp,dl,Su(H),slp1,tin,hb,Lpt,Med,prd,tll,da,
CHR2R	8874809	8875309	CG33798	dl,bin,
CHR2R	8878249	8878749	CG33798	Hr78,cnc,N,CG8478,psq,Su(H),gro,HDAC4a,Trl,bon,h,Dll,dl,Lpt,Mef2,Abd-B,twi,
CHR2R	8886235	8886735	Su(z)2	Trl,dl,sens,
CHR2R	8901789	8902289	Su(z)2	hth,Trl,CG8478,dl,
CHR2R	8903088	8903588	Su(z)2	Hr78,Su(var)3-9,HDAC1,N,CG8478,Su(H),gro,HDAC4a,Trl,yki,bon,Dll,Tbp,dl,EcR,insv,
CHR2R	89163	89663	CG40127	HP1b,
CHR2R	8919776	8920276	CG13323	bin,gro,Trl,bon,dl,sens,
CHR2R	8922796	8923296	CG13323	Hr78,cnc,Dfd,CG8478,hth,gro,HDAC4a,usp,Trl,yki,bon,Dll,HDAC1,psq,dl,Su(H),eve,HDAC11,E(z),
CHR2R	8926173	8926673	CG13323	mod(mdg4),Su(var)3-9,HDAC1,N,dm,gro,HDAC4a,Trl,CG8478,Dll,Tbp,dl,Su(H),Abd-B,Mef2,E(z),
CHR2R	8979436	8979936	Drl-2	-
CHR2R	9058755	9059255	CG33138	Trl,HDAC3,dl,
CHR2R	9109641	9110141	Dp	CG8478,Su(var)3-9,HDAC1,CTCF,HDAC4a,HDAC3,Trl,CBP,twi,h,Tbp,dl,Med,jumu,Sin3A,HDAC6,prd,HDAC11,da,
CHR2R	919379	919879	CR44105	HP1b,CBP,
CHR2R	9215118	9215618	CG17048	Dfd,
CHR2R	9218417	9218917	CG17048	-
CHR2R	9220766	9221266	CG17048	Trl,twi,sens,
CHR2R	9225262	9225762	CG17048	HDAC1,CG8478,CTCF,HDAC4a,Trl,CBP,twi,dl,hb,Med,Mef2,prd,da,
CHR2R	9231201	9231701	CG17048	ttk,su(Hw),mod(mdg4),CTCF,Trl,CBP,twi,da,
CHR2R	926858	927358	CR44105	HP1b,
CHR2R	9272156	9272656	CG10814	-
CHR2R	9337783	9338283	cnn	HDAC1,CTCF,su(Hw),HP1b,dm,HDAC4a,trem,Trl,br,bin,twi,HDAC3,Tbp,dl,slp1,Med,jumu,Sin3A,disco,Mef2,HDAC11,Ubx,HDAC6,prd,D,da,E(z),
CHR2R	936843	937343	CR44105	-
CHR2R	9379726	9380226	bbc	cnc,HDAC3,
CHR2R	9385995	9386495	mars	-
CHR2R	9387283	9387783	mars	eve,Trl,usp,twi,HDAC4a,dl,Med,EcR,HDAC11,da,
CHR2R	9389787	9390287	mars	CG8478,Stat92E,HDAC1,N,cad,gro,HDAC4a,HDAC3,Trl,yki,twi,Dll,sens,Tbp,dl,Su(H),Lpt,Med,jumu,Sin3A,HDAC6,prd,Eip74EF,Abd-B,da,Mef2,
CHR2R	94170	94670	CG40127	HP1b,
CHR2R	9427228	9427728	CG6145	sna,cnc,gro,Trl,yki,CG8478,bon,twi,dl,Med,EcR,prd,su(Hw),
CHR2R	944052	944552	TpnC41C	HP1b,su(Hw),
CHR2R	9453435	9453935	CG42807	sna,Su(H),bap,shn,Mef2,Kr,kni,bcd,hkb,gro,eve,zfh1,tll,pan,Trl,twi,h,Tbp,HDAC1,dl,cad,tin,hb,bab1,Lpt,Med,sens,HDAC11,prd,en,da,E(z),
CHR2R	9469749	9470249	CG42808	su(Hw),HDAC3,
CHR2R	9475232	9475732	CG6191	cnc,dm,Trl,Tbp,
CHR2R	9480761	9481261	CG6197	sna,Sin3A,HDAC1,CG8478,hkb,dm,CTCF,HDAC4a,usp,Trl,twi,HDAC3,Tbp,dl,hb,Med,jumu,HDAC11,Ubx,HDAC6,da,
CHR2R	9481334	9481834	CG6197	HDAC1,HDAC3,Trl,twi,sens,dl,hb,Med,jumu,Sin3A,Ubx,HDAC6,CTCF,HDAC11,da,
CHR2R	9529184	9529684	fas	su(Hw),CBP,
CHR2R	9567382	9567882	CG18368	-
CHR2R	9710782	9711282	fl(2)d	HDAC1,N,ttk,Dfd,CG8478,HDAC3,Trl,twi,Tbp,dl,Med,da,
CHR2R	9770917	9771417	shot	-
CHR2R	9806921	9807421	shot	eve,HDAC4a,Trl,psq,sens,
CHR2R	9812722	9813222	shot	sna,Su(var)3-9,gsb-n,HDAC1,shn,N,Mef2,CG8478,gro,Dfd,z,Trl,yki,bon,twi,Dll,Tbp,dl,Su(H),Med,Eip74EF,da,lola,
CHR2R	9828436	9828936	shot	sna,mod(mdg4),cnc,HDAC1,Kr,CG8478,D,CTCF,gro,HDAC4a,z,pan,Trl,yki,twi,Dll,HDAC3,Tbp,psq,dl,Su(H),hb,Lpt,Med,disco,Mef2,cad,da,
CHR2R	9841364	9841864	AGO1	CG8478,Hr78,bap,HDAC1,N,CTCF,mod(mdg4),dm,zfh1,HDAC4a,Dfd,z,Trl,sc,twi,h,Tbp,dl,EcR,tin,hb,Lpt,Med,jumu,Sin3A,Mef2,usp,HDAC6,prd,Abd-B,da,E(z),
CHR2R	9845283	9845783	AGO1	CG8478,Hr78,HDAC1,N,h,su(Hw),mod(mdg4),cnc,CTCF,gro,Trl,CBP,yki,Dll,HDAC3,dl,Su(H),bab1,Eip74EF,Abd-B,
CHR2R	9849771	9850271	Cp1	twi,HDAC3,dl,da,Mef2,
CHR2R	9851422	9851922	CG42806	cnc,HDAC11,HDAC1,GATAe,Mef2,CTCF,gro,HDAC4a,Trl,h,dl,Lpt,disco,cad,D,
CHR2R	9865753	9866253	CG6701	twi,HDAC3,dl,
CHR2R	9882796	9883296	mam	Hr78,HDAC1,N,gro,Trl,CG8478,twi,dl,tin,Lpt,Med,disco,da,
CHR2R	9888340	9888840	mam	Su(H),gro,usp,Trl,yki,twi,hth,h,Dll,HDAC3,Tbp,HDAC1,dl,EcR,hb,Lpt,Med,HDAC11,insv,da,
CHR2R	9894289	9894789	mam	cnc,Su(var)3-9,HDAC1,Mef2,bin,dm,gro,HDAC4a,z,Trl,yki,Dll,Tbp,dl,Su(H),Med,HDAC3,Abd-B,insv,
CHR2R	9899054	9899554	mam	Trl,
CHR2R	9905843	9906343	mam	-
CHR2R	9924983	9925483	mam	pan,eve,Trl,
CHR2R	9936623	9937123	mam	prd,
CHR3L	10009703	10010203	dpr6	tll,
CHR3L	10046866	10047366	CG14160	-
CHR3L	10107373	10107873	CG42826	kn,
CHR3L	10217599	10218099	scramb1	Su(var)3-9,HDAC1,CTCF,br,HDAC3,HDAC11,Hr39,bab1,HDAC6,
CHR3L	1030753	1031253	CG9205	Su(H),gro,HDAC4a,CTCF,psq,sens,HDAC11,pan,
CHR3L	10339125	10339625	CR43990	jumu,disco,
CHR3L	1034163	1034663	CG9205	CG8478,bap,HDAC1,N,ttk,Dfd,bin,Su(H),dm,CTCF,pan,Trl,twi,hth,Tbp,dl,Lpt,Med,Sin3A,Mef2,HDAC6,Eip74EF,da,
CHR3L	1034828	1035328	CG9205	bap,Sin3A,HDAC1,N,dm,CTCF,Dfd,pan,Trl,twi,HDAC3,Tbp,dl,bin,Med,Mef2,HDAC6,Eip74EF,da,
CHR3L	10378629	10379129	CR43990	-
CHR3L	10398546	10399046	CR43990	-
CHR3L	1047560	1048060	CG9205	-
CHR3L	10509506	10510006	A2bp1	Su(var)3-9,HDAC1,Mef2,bcd,psq,dm,HDAC4a,z,pan,Trl,twi,Dll,Tbp,dl,cad,hb,Lpt,Med,Sin3A,prd,HDAC11,da,
CHR3L	10518811	10519311	A2bp1	Su(var)3-9,Mef2,twi,HDAC4a,dl,tin,Med,prd,da,
CHR3L	1054920	1055420	CG9205	CBP,
CHR3L	10558510	10559010	CG6527	-
CHR3L	10564090	10564590	CG6527	su(Hw),
CHR3L	10565503	10566003	CG6527	su(Hw),
CHR3L	10605604	10606104	CG42521	-
CHR3L	1064062	1064562	CG9205	CTCF,CBP,su(Hw),dl,
CHR3L	10644226	10644726	CG14153	-
CHR3L	10645523	10646023	CG32066	Trl,twi,dl,HDAC1,
CHR3L	10674811	10675311	CG11811	HDAC1,CG8478,gro,Trl,yki,twi,Dll,dl,Su(H),HDAC3,insv,
CHR3L	1068878	1069378	bab1	-
CHR3L	10730040	10730540	CG43245	CG8478,Hr78,HDAC11,Su(var)3-9,HDAC1,N,Mef2,bin,hth,gro,HDAC4a,Trl,yki,bon,h,Dll,dl,EcR,Su(H),sens,Eip74EF,Abd-B,
CHR3L	10732333	10732833	CG43245	CG8478,Hr78,HDAC11,gsb-n,HDAC1,su(Hw),hth,gro,HDAC4a,z,usp,Trl,yki,bon,Dll,dl,Su(H),Abd-B,
CHR3L	10736451	10736951	CG43245	gro,Trl,
CHR3L	10742872	10743372	CG43245	-
CHR3L	10751064	10751564	CG43245	-
CHR3L	10764637	10765137	CG43245	Kr,hth,sc,twi,dl,gro,Med,CG16778,fru,prd,cad,
CHR3L	10777839	10778339	CG43245	cnc,
CHR3L	10786444	10786944	CG12523	gro,Trl,
CHR3L	10795847	10796347	CG12523	-
CHR3L	10831243	10831743	tna	eve,CTCF,Trl,
CHR3L	1083709	1084209	bab1	cnc,dl,Mef2,
CHR3L	10845529	10846029	tna	bap,HDAC11,Su(var)3-9,HDAC1,Mef2,lola,CG8478,bin,hth,gro,z,Trl,CTCF,usp,bon,twi,Dll,Tbp,HDAC4a,dl,slp1,tin,hb,Lpt,Med,disco,EcR,cad,da,
CHR3L	10849763	10850263	tna	CG8478,Su(H),bap,HDAC11,Su(var)3-9,Hr78,HDAC1,kn,Mef2,Kr,CTCF,gro,hth,zfh1,HDAC4a,z,tll,Trl,usp,yki,bon,twi,h,Dll,Tbp,dl,cad,tin,hb,Lpt,Med,Ubx,prd,Abd-B,en,insv,da,kni,E(z),
CHR3L	10856533	10857033	tna	sna,HDAC11,HDAC1,CTCF,cad,HDAC4a,Mef2,twi,dl,slp1,hb,Med,HDAC3,HDAC6,da,
CHR3L	10857831	10858331	tna	HDAC1,su(Hw),dl,
CHR3L	10861151	10861651	tna	Trl,bon,dl,
CHR3L	10891425	10891925	Aps	CG8478,Hr78,lola,HDAC1,N,Mef2,CTCF,mod(mdg4),Su(H),dm,gro,zfh1,Trl,Tbp,psq,dl,bab1,Sin3A,Eip74EF,Abd-B,E(z),
CHR3L	10926618	10927118	CG34050	chinmo,Dll,
CHR3L	1093537	1094037	bab1	cnc,HDAC1,gro,twi,Snr1,cad,da,
CHR3L	10978824	10979324	CG14147	dl,
CHR3L	11028288	11028788	CG43693	su(Hw),mod(mdg4),CTCF,D,da,
CHR3L	11037902	11038402	CG43693	GATAe,CTCF,su(Hw),mod(mdg4),HDAC4a,CBP,dl,Lpt,Med,disco,D,da,HDAC1,
CHR3L	11057926	11058426	SuUR	HDAC1,Mef2,eve,dm,Trl,yki,HDAC3,sens,Tbp,HDAC4a,dl,Med,Sin3A,HDAC11,Ubx,HDAC6,CTCF,
CHR3L	11102806	11103306	CG7638	HDAC1,GATAe,Mef2,hkb,CTCF,HDAC4a,HDAC3,sens,dl,jumu,HDAC6,twi,
CHR3L	11112640	11113140	fd68A	CG8478,Hr78,HDAC1,N,Mef2,bin,hth,zfh1,Dfd,Trl,br,sc,twi,Tbp,psq,dl,Su(H),slp1,hb,Lpt,Med,fru,Snr1,Eip74EF,da,lola,
CHR3L	11113671	11114171	mRpL2	CG8478,HDAC11,Su(var)3-9,HDAC1,N,Mef2,CTCF,bin,dm,zfh1,HDAC4a,HDAC3,Trl,twi,Tbp,dl,hb,Med,Sin3A,HDAC6,da,E(z),lola,
CHR3L	11116111	11116611	Ufd1-like	mod(mdg4),cnc,HDAC11,HDAC1,CTCF,su(Hw),hkb,dm,gro,HDAC4a,HDAC3,Trl,twi,Tbp,dl,slp1,bab1,Med,jumu,sens,Sin3A,HDAC6,da,
CHR3L	1117634	1118134	bab1	bap,bin,pan,twi,dl,gro,Mef2,
CHR3L	11190451	11190951	GlcAT-P	eve,HDAC4a,Trl,twi,Tbp,dl,bin,Mef2,en,HDAC1,
CHR3L	11203596	11204096	CG7600	cnc,HDAC11,HDAC1,CTCF,HDAC4a,HDAC3,twi,Tbp,dl,Med,Sin3A,HDAC6,da,
CHR3L	1121743	1122243	bab1	twi,
CHR3L	11239054	11239554	scyl	sna,CG8478,Hr78,HDAC1,N,hth,gro,z,pan,Trl,yki,twi,Dll,Tbp,dl,Su(H),hb,Lpt,Med,Mef2,tll,cad,da,
CHR3L	11240770	11241270	scyl	Hr78,gsb-n,HDAC1,kn,N,CG8478,hkb,eve,CTCF,gro,HDAC4a,z,Trl,yki,twi,Dll,Tbp,dl,Su(H),tin,bab1,Med,Mef2,Ubx,HDAC11,da,
CHR3L	11245049	11245549	scyl	HDAC11,Su(var)3-9,gsb-n,HDAC1,GATAe,CG8478,gro,HDAC4a,z,Trl,yki,twi,Dll,HDAC3,Tbp,dl,cad,Su(H),hb,Lpt,Med,disco,Mef2,HDAC6,prd,CTCF,da,
CHR3L	11254491	11254991	scyl	sna,bin,gro,eve,D,pan,twi,Tbp,dl,slp1,hb,Med,HDAC11,da,
CHR3L	11343843	11344343	CG6163	CTCF,eve,HDAC1,
CHR3L	11358083	11358583	CG6163	N,CG8478,psq,gro,Pcl,Trl,Dll,su(Hw),dl,Su(H),insv,
CHR3L	11421507	11422007	CG7560	z,usp,Trl,yki,Tbp,dl,
CHR3L	11424871	11425371	CG6149	twi,Dll,
CHR3L	11435215	11435715	CG7557	-
CHR3L	11465681	11466181	Vha16-3	twi,hth,dl,cad,disco,HDAC6,HDAC11,
CHR3L	11480388	11480888	chrb	lola,cnc,HDAC11,Su(var)3-9,gsb-n,HDAC1,GATAe,Mef2,hkb,gro,HDAC4a,z,usp,Trl,yki,twi,Dll,Tbp,dl,Su(H),Med,disco,HDAC6,prd,CTCF,D,insv,da,
CHR3L	11519048	11519548	CG11714	-
CHR3L	11543500	11544000	Mob2	-
CHR3L	11546297	11546797	Mob2	CG8478,HDAC11,HDAC1,kn,N,Mef2,D,gro,zfh1,HDAC4a,Trl,yki,twi,h,Dll,Tbp,dl,Su(H),tin,Lpt,Med,Ubx,Eip74EF,Abd-B,da,cnc,
CHR3L	11549312	11549812	Mob2	h,Dfd,Trl,twi,dl,
CHR3L	11555443	11555943	CG7394	sna,HDAC1,dm,HDAC4a,trem,tll,Trl,twi,Tbp,dl,slp1,Med,Sin3A,Ubx,HDAC6,HDAC3,HDAC11,da,kni,
CHR3L	11557759	11558259	CG33267	-
CHR3L	11565030	11565530	CG33490	-
CHR3L	11620899	11621399	CG18815	HDAC11,HDAC1,HDAC4a,HDAC3,Sin3A,HDAC6,da,
CHR3L	11689825	11690325	CG11652	HDAC11,HDAC1,eve,dm,HDAC4a,usp,twi,Tbp,dl,Med,Sin3A,EcR,Ubx,HDAC6,da,Mef2,E(z),
CHR3L	11707136	11707636	CG14132	-
CHR3L	11740467	11740967	Gr68a	chinmo,su(Hw),
CHR3L	1175708	1176208	bab2	ttk,twi,dl,
CHR3L	11757218	11757718	CG6024	twi,dl,Med,prd,
CHR3L	11781821	11782321	Pi3K68D	HDAC1,eve,Trl,CG8478,twi,psq,dl,hb,Med,
CHR3L	11812860	11813360	CG5946	cnc,Su(var)3-9,HDAC1,eve,z,Trl,yki,Dll,HDAC3,Tbp,dl,Su(H),Med,HDAC11,
CHR3L	11984910	11985410	viaf	chinmo,HDAC3,
CHR3L	11995163	11995663	Pop2	CG8478,Su(var)3-9,HDAC1,GATAe,N,CTCF,cad,ttk,mod(mdg4),HDAC4a,sc,HDAC3,Tbp,dl,Med,jumu,Sin3A,disco,HDAC6,D,Ubx,
CHR3L	12022595	12023095	CR43994	twi,
CHR3L	12093972	12094472	CG17154	slp1,
CHR3L	12096188	12096688	l(3)j2D3	-
CHR3L	12104100	12104600	l(3)j2D3	Su(var)3-9,eve,hth,gro,Trl,Dll,psq,EcR,HDAC1,
CHR3L	12112916	12113416	CG11560	HDAC1,HDAC3,dl,Sin3A,HDAC6,
CHR3L	12131308	12131808	l(3)neo18	Sin3A,HDAC1,GATAe,kn,hkb,dm,CTCF,trem,tll,HDAC3,Dfd,Tbp,dl,Med,jumu,Mef2,HDAC11,Ubx,HDAC6,D,kni,
CHR3L	12140015	12140515	Nrx-IV	HDAC1,psq,bin,z,pan,Trl,twi,Tbp,dl,Med,Sin3A,CG16778,HDAC3,fru,HDAC6,HDAC11,
CHR3L	12142285	12142785	eap	sens,da,
CHR3L	1219454	1219954	LysP	-
CHR3L	12221707	12222207	app	su(Hw),
CHR3L	12235062	12235562	CG43991	su(Hw),Trl,
CHR3L	12236238	12236738	CG43991	su(Hw),
CHR3L	12254978	12255478	app	-
CHR3L	12258911	12259411	app	cnc,HDAC1,Mef2,CG8478,CTCF,pan,Trl,twi,Tbp,dl,hb,Lpt,Med,Sin3A,D,da,
CHR3L	12317073	12317573	CG32105	tin,Mef2,
CHR3L	12329683	12330183	CG10418	HDAC1,dm,trem,Dfd,HDAC3,Trl,Tbp,HDAC4a,dl,Sin3A,HDAC6,HDAC11,kni,
CHR3L	12350262	12350762	GRHRII	su(Hw),
CHR3L	12355304	12355804	GRHRII	-
CHR3L	12384362	12384862	Ncc69	mod(mdg4),bap,HDAC1,Mef2,su(Hw),bin,Trl,Tbp,dl,da,
CHR3L	12392177	12392677	CG32104	HDAC1,HDAC4a,CTCF,HDAC3,dl,Med,Sin3A,HDAC6,insv,
CHR3L	12399970	12400470	CG32103	cnc,gro,Trl,dl,Su(H),
CHR3L	1247660	1248160	Sac1	Sin3A,HDAC1,N,CTCF,HP1b,HDAC4a,trem,Dfd,tll,HDAC3,twi,sens,Tbp,dl,Med,HDAC11,HDAC6,D,
CHR3L	12494130	12494630	CG10638	HDAC1,HDAC4a,trem,HDAC3,HDAC6,HDAC11,
CHR3L	12508835	12509335	tral	cnc,Su(var)3-9,HDAC1,CTCF,gro,HDAC3,Trl,twi,dl,Su(H),Med,sens,EcR,fru,HDAC6,Snr1,HDAC11,E(z),
CHR3L	12516915	12517415	Pcaf	Su(var)3-9,HDAC1,ttk,trem,HDAC3,dl,HDAC11,Med,Sin3A,usp,fru,HDAC6,CTCF,
CHR3L	12525385	12525885	Tsf2	ttk,HDAC3,CBP,HDAC1,dl,sens,
CHR3L	12572949	12573449	ara	sna,CG8478,HDAC1,hth,gro,HDAC4a,Trl,twi,h,Dll,dl,Med,da,
CHR3L	12650682	12651182	CR43431	GATAe,dl,
CHR3L	12661637	12662137	CR43431	CTCF,twi,dl,
CHR3L	12691313	12691813	mirr	twi,hth,slp1,Med,da,
CHR3L	12765386	12765886	Hip1	HDAC1,eve,HDAC3,HDAC4a,HDAC6,
CHR3L	12787586	12788086	CG42709	HDAC1,CG8478,hkb,Trl,twi,dl,sens,
CHR3L	12806747	12807247	CG10754	Su(var)3-9,HDAC1,HDAC3,Trl,twi,dl,hb,Med,Sin3A,HDAC6,HDAC11,kni,
CHR3L	12827569	12828069	CG10960	su(Hw),CTCF,dl,
CHR3L	12917412	12917912	CG32115	trem,
CHR3L	12918856	12919356	CG32115	trem,
CHR3L	12926553	12927053	CG32115	-
CHR3L	12954426	12954926	Or69a	-
CHR3L	1295646	1296146	Rabex-5	HDAC1,HP1b,HDAC4a,HDAC3,Trl,Tbp,dl,Sin3A,HDAC11,HDAC6,CTCF,
CHR3L	1300125	1300625	scf	Su(var)3-9,ttk,Trl,twi,HDAC3,HDAC4a,dl,tin,da,Mef2,
CHR3L	13006444	13006944	MICAL-like	HDAC3,CBP,sens,
CHR3L	13023055	13023555	CG17672	pan,HDAC4a,dl,prd,da,
CHR3L	13037447	13037947	Syx13	CG8478,Hr78,HDAC11,Sin3A,HDAC1,N,h,HDAC4a,HDAC3,twi,Tbp,dl,Med,HDAC6,da,
CHR3L	1304496	1304996	CG9149	chinmo,HDAC3,
CHR3L	1307351	1307851	CG2469	HDAC11,HDAC1,CTCF,dm,HDAC4a,trem,HDAC3,CBP,twi,Tbp,dl,Med,jumu,Sin3A,Mef2,HDAC6,da,E(z),
CHR3L	130972	131472	Pdk1	CG8478,cnc,Su(var)3-9,HDAC1,kn,Mef2,bin,gro,eve,z,usp,pan,Trl,yki,twi,Dll,Tbp,psq,dl,cad,Su(H),slp1,tin,hb,Lpt,Med,EcR,insv,da,E(z),
CHR3L	13180114	13180614	snky	Kr,cad,gro,
CHR3L	13182850	13183350	snky	twi,HDAC4a,
CHR3L	1321235	1321735	Myo61F	gro,CTCF,CBP,
CHR3L	13221264	13221764	caps	mod(mdg4),gsb-n,HDAC1,N,CTCF,CG8478,bin,gro,dm,HDAC4a,z,Trl,twi,yki,Dll,Tbp,dl,Su(H),tin,bab1,Lpt,Med,Mef2,Eip74EF,Abd-B,en,da,E(z),
CHR3L	13226849	13227349	caps	hth,Trl,
CHR3L	13252562	13253062	tRNA:D2:69F	CBP,
CHR3L	13279618	13280118	CR43913	-
CHR3L	13280538	13281038	CR43913	-
CHR3L	1329875	1330375	mtacp1	sna,cnc,HDAC1,psq,HDAC4a,trem,HDAC3,CTCF,twi,sens,Tbp,dl,Med,Sin3A,HDAC6,D,da,
CHR3L	13314255	13314755	CG14113	CBP,
CHR3L	1334274	1334774	CG2211	Su(var)3-9,HDAC1,ttk,HDAC4a,trem,Trl,CBP,twi,HDAC3,Tbp,dl,Med,sens,Sin3A,HDAC11,HDAC6,prd,CTCF,da,
CHR3L	1335953	1336453	CG2211	cnc,HDAC1,GATAe,hkb,Trl,twi,HDAC3,dl,Med,sens,HDAC11,da,
CHR3L	13435512	13436012	CG10732	hb,HDAC3,
CHR3L	13468714	13469214	CG10089	-
CHR3L	13482230	13482730	CG10741	hth,dm,Trl,twi,dl,Med,prd,da,
CHR3L	13485022	13485522	CG10741	GATAe,
CHR3L	13488190	13488690	CG10741	ttk,chinmo,Trl,
CHR3L	13490983	13491483	CG10741	chinmo,gro,Trl,twi,cad,prd,da,
CHR3L	1350267	1350767	Ptp61F	CG8478,Hr78,lola,Sin3A,HDAC1,kn,N,psq,gro,zfh1,Trl,sc,twi,Tbp,dl,Lpt,Med,Abd-B,da,E(z),
CHR3L	13505804	13506304	Vps36	sna,HDAC1,dm,tll,HDAC3,br,Trl,twi,Tbp,dl,Med,jumu,sens,Sin3A,eve,Mef2,HDAC11,HDAC6,da,
CHR3L	1354033	1354533	312	Mef2,
CHR3L	13555003	13555503	CG10710	chinmo,
CHR3L	13574425	13574925	CG10710	su(Hw),
CHR3L	13575854	13576354	CG10710	su(Hw),
CHR3L	13593885	13594385	bru-3	-
CHR3L	13639230	13639730	bru-3	twi,dl,Hr39,
CHR3L	13657042	13657542	bru-3	-
CHR3L	1366867	1367367	ru	mod(mdg4),N,Trl,twi,hth,Tbp,dl,Su(H),tin,Med,da,Mef2,E(z),HDAC1,
CHR3L	13703055	13703555	bru-3	-
CHR3L	13703647	13704147	bru-3	-
CHR3L	13752428	13752928	bru-3	-
CHR3L	13755906	13756406	bru-3	-
CHR3L	13764476	13764976	bru-3	-
CHR3L	137784	138284	Pdk1	cnc,Mef2,z,Trl,CBP,twi,dl,Med,sens,da,
CHR3L	13895374	13895874	dysc	su(Hw),sbb,Trl,
CHR3L	13957537	13958037	Meics	Sin3A,HDAC1,dm,trem,br,CTCF,Trl,yki,twi,HDAC3,Tbp,dl,bab1,Med,sens,Ubx,HDAC6,HDAC11,da,
CHR3L	13992024	13992524	CG17359	HDAC1,HDAC3,HDAC4a,HDAC6,
CHR3L	13995466	13995966	CG9007	CG8478,Hr78,HDAC1,kn,N,bcd,psq,CTCF,zfh1,trem,z,tll,pan,bin,Trl,twi,Tbp,dl,hb,Lpt,Med,Sin3A,Mef2,prd,cad,
CHR3L	13997006	13997506	CG9007	CG8478,HDAC1,N,psq,HDAC4a,trem,z,Trl,CBP,twi,HDAC3,Tbp,dl,hb,Lpt,Med,sens,Sin3A,Mef2,HDAC6,cad,
CHR3L	14021902	14022402	ptip	CG8478,Su(var)3-9,HDAC1,N,CTCF,hth,z,HDAC3,br,Trl,twi,Tbp,dl,HDAC11,cad,Med,Sin3A,Ubx,HDAC6,Abd-B,E(z),
CHR3L	14048485	14048985	CG32138	HDAC1,su(Hw),gro,HDAC4a,Trl,CG8478,bon,twi,dl,slp1,
CHR3L	14060951	14061451	Pex1	HDAC3,
CHR3L	14194102	14194602	CG32141	CG8478,Trl,twi,Tbp,dl,hb,Lpt,Med,sens,prd,da,HDAC1,
CHR3L	14217224	14217724	nuf	Trl,
CHR3L	14221648	14222148	nuf	eve,Trl,
CHR3L	14260305	14260805	fz	su(Hw),Trl,
CHR3L	14280488	14280988	fz	pan,HDAC4a,tin,Mef2,cnc,
CHR3L	14320182	14320682	CG13482	-
CHR3L	14329630	14330130	CG13482	eve,hth,sens,
CHR3L	14347551	14348051	CG13481	twi,
CHR3L	1438264	1438764	SA-2	pan,dl,Med,sens,cnc,
CHR3L	14402525	14403025	stwl	CG8478,lola,HDAC1,GATAe,CTCF,HDAC4a,trem,Trl,yki,twi,Dll,Tbp,dl,Su(H),slp1,hb,Lpt,Med,Sin3A,Mef2,HDAC11,Ubx,fru,HDAC6,Snr1,cad,da,E(z),
CHR3L	14418157	14418657	bbg	cnc,
CHR3L	14454770	14455270	bbg	CTCF,
CHR3L	14469767	14470267	bbg	gro,Trl,Dll,Su(H),EcR,
CHR3L	1449250	1449750	SA-2	cnc,
CHR3L	14517349	14517849	CG4613	-
CHR3L	1459919	1460419	rho	chinmo,gro,twi,Dll,
CHR3L	14624773	14625273	RecQ5	HDAC11,HDAC1,N,HP1b,hkb,trem,Trl,CBP,twi,HDAC3,Tbp,HDAC4a,dl,Lpt,Med,jumu,sens,Sin3A,Mef2,Ubx,HDAC6,cad,kni,
CHR3L	14630795	14631295	dlp	Su(var)3-9,GATAe,twi,hth,sens,dl,Lpt,Med,jumu,disco,da,Mef2,cnc,
CHR3L	1463496	1463996	rho	sna,mod(mdg4),HDAC1,gro,Trl,twi,Tbp,dl,hb,Med,disco,da,
CHR3L	14656163	14656663	CG43121	Mef2,bin,tin,twi,
CHR3L	14701586	14702086	ome	Trl,Mef2,
CHR3L	14747921	14748421	CG42507	Hr78,lola,bap,Su(var)3-9,gsb-n,HDAC1,shn,kn,Mef2,bin,gro,z,pan,Trl,twi,yki,CG8478,bon,Dll,HDAC3,Tbp,dl,Su(H),slp1,tin,Lpt,Med,prd,insv,da,
CHR3L	14749372	14749872	CG42507	CG8478,Hr78,lola,bap,HDAC11,Su(var)3-9,gsb-n,HDAC1,Mef2,bin,gro,HDAC4a,z,HDAC3,Trl,yki,bon,twi,Dll,Dfd,Tbp,dl,Su(H),slp1,Lpt,Med,sens,HDAC6,insv,da,kni,
CHR3L	14750722	14751222	CG42507	sna,CG8478,Hr78,mod(mdg4),bap,Su(var)3-9,HDAC1,kn,Mef2,bin,gro,zfh1,HDAC4a,z,pan,Trl,twi,yki,bon,Dll,HDAC3,Tbp,dl,Su(H),hb,Lpt,Med,sens,Sin3A,disco,cad,CTCF,D,da,
CHR3L	14774142	14774642	bmm	Hr78,bap,Su(var)3-9,HDAC1,GATAe,N,Mef2,bin,gro,Trl,usp,twi,yki,CG8478,Dll,Tbp,dl,EcR,Lpt,Med,disco,da,
CHR3L	14777679	14778179	bmm	HDAC1,Mef2,bin,gro,eve,hth,HDAC4a,Trl,twi,dl,tin,Med,HDAC3,prd,HDAC11,da,
CHR3L	14783206	14783706	CG9425	cnc,HDAC1,kn,hkb,dm,CTCF,ttk,HDAC4a,Trl,twi,Tbp,dl,Med,Sin3A,brm,HDAC3,Ubx,HDAC6,Mef2,D,
CHR3L	14784060	14784560	CG9425	HDAC1,GATAe,kn,twi,HDAC3,HDAC4a,dl,Med,Sin3A,disco,brm,HDAC6,CTCF,HDAC11,
CHR3L	14817702	14818202	CG17839	-
CHR3L	14905485	14905985	DCX-EMAP	-
CHR3L	14964633	14965133	Brd	sna,bap,HDAC1,HDAC4a,pan,Mef2,twi,hth,Tbp,dl,slp1,tin,gro,hb,Lpt,Med,sens,HDAC11,prd,D,da,
CHR3L	14967797	14968297	Ocho	sna,Su(H),Su(var)3-9,shn,bcd,twi,hth,h,sens,Tbp,dl,tin,Mad,gro,hb,Med,HDAC11,prd,da,Mef2,HDAC1,
CHR3L	14992779	14993279	Prosbeta2	cnc,Sin3A,HDAC1,kn,dm,HDAC4a,HDAC3,CTCF,Trl,twi,Tbp,dl,Med,Ubx,HDAC6,HDAC11,kni,
CHR3L	14997599	14998099	Prosbeta2	-
CHR3L	1505515	1506015	Psa	-
CHR3L	15097654	15098154	CTPsyn	CG8478,Hr78,N,gro,HDAC4a,Trl,yki,bon,h,Dll,dl,Su(H),HDAC11,Abd-B,insv,
CHR3L	15100409	15100909	CR43971	N,h,CG8478,gro,usp,Trl,bon,Dll,HDAC4a,dl,HDAC11,Abd-B,
CHR3L	15137563	15138063	Pex3	Su(var)3-9,HDAC1,GATAe,hkb,CTCF,HDAC3,Trl,twi,sens,Tbp,dl,Med,jumu,Sin3A,disco,Ubx,HDAC6,HDAC11,
CHR3L	1515834	1516334	cue	HDAC1,Trl,twi,Tbp,dl,tin,Med,sens,HDAC11,prd,Mef2,da,
CHR3L	15172091	15172591	CG7011	bap,HDAC1,Mef2,CTCF,su(Hw),bin,HDAC4a,Trl,twi,dl,gro,
CHR3L	1517293	1517793	Psa	sna,HDAC1,GATAe,hkb,su(Hw),mod(mdg4),dm,CTCF,HDAC4a,trem,tll,Mef2,Trl,twi,sens,Tbp,dl,Med,jumu,Sin3A,disco,Ubx,HDAC6,prd,HDAC11,D,da,
CHR3L	15184289	15184789	CG6888	-
CHR3L	1518903	1519403	Psa	cnc,HDAC3,
CHR3L	15207376	15207876	CG6888	gro,h,Dll,Hr39,
CHR3L	15214057	15214557	CG6888	Su(var)3-9,sens,
CHR3L	15224857	15225357	Tollo	bcd,twi,hth,dl,Med,D,da,
CHR3L	15227254	15227754	Tollo	sna,HDAC1,mod(mdg4),CTCF,z,pan,Trl,twi,Dll,Tbp,dl,Su(H),Lpt,Med,prd,da,
CHR3L	15236033	15236533	Tollo	-
CHR3L	15242518	15243018	Tollo	-
CHR3L	15262227	15262727	Best4	mod(mdg4),CTCF,bab1,
CHR3L	15290726	15291226	Best4	dl,Med,E(z),
CHR3L	15450961	15451461	CG7804	-
CHR3L	1546391	1546891	Cct1	mod(mdg4),cnc,Su(var)3-9,HDAC1,Mef2,hkb,bin,gro,HDAC4a,z,Trl,yki,twi,h,Dll,Tbp,dl,Su(H),slp1,Med,sens,Sin3A,prd,da,E(z),
CHR3L	15547174	15547674	AGO2	mod(mdg4),cnc,HDAC1,CTCF,CG8478,dm,HDAC4a,trem,z,Trl,yki,twi,Tbp,dl,hb,bab1,Med,Sin3A,Mef2,prd,da,E(z),
CHR3L	1558190	1558690	CG12099	Su(var)3-9,HDAC1,N,dm,tll,HDAC3,Trl,twi,Tbp,dl,Med,Sin3A,HDAC6,HDAC11,kni,
CHR3L	15589226	15589726	RhoGAP71E	eve,Trl,twi,dl,hb,Med,cad,
CHR3L	15590273	15590773	RhoGAP71E	eve,gro,
CHR3L	15592950	15593450	CG7650	dl,jumu,D,
CHR3L	15612700	15613200	CG7372	CG8478,Su(var)3-9,HDAC1,GATAe,N,hkb,dm,gro,HDAC4a,Dfd,z,tll,Trl,yki,twi,Dll,Tbp,dl,Su(H),Hr39,Med,Sin3A,brm,CG16778,HDAC6,prd,HDAC11,D,da,CTCF,
CHR3L	15618526	15619026	CG7372	N,CG8478,eve,gro,usp,Trl,Dll,HDAC4a,psq,dl,Su(H),HDAC11,
CHR3L	15619768	15620268	comm3	Trl,HDAC1,dl,
CHR3L	15624227	15624727	comm3	-
CHR3L	157612	158112	CG43151	sna,bin,twi,dl,cad,slp1,tin,Med,da,Mef2,
CHR3L	15795344	15795844	CG6244	D,pan,CBP,twi,hth,HDAC4a,dl,cad,gro,hb,Med,sens,prd,eve,HDAC11,da,E(z),
CHR3L	15810695	15811195	CkIIalpha-i1	sna,HDAC1,GATAe,ttk,hkb,mod(mdg4),HDAC4a,HDAC3,CBP,twi,sens,dl,jumu,D,
CHR3L	15818527	15819027	Dcp2	CG8478,Hr78,HDAC1,N,Mef2,bin,eve,zfh1,Dfd,z,Trl,sc,twi,Tbp,psq,dl,Su(H),Med,Sin3A,Ubx,prd,Eip74EF,lola,
CHR3L	15825343	15825843	CG12713	mod(mdg4),Hr78,HDAC1,N,CTCF,HP1b,dm,ttk,HDAC4a,trem,tll,twi,HDAC3,Tbp,psq,dl,Med,jumu,Sin3A,Ubx,HDAC6,Snr1,HDAC11,E(z),lola,
CHR3L	1583058	1583558	CG13917	z,Trl,CBP,
CHR3L	1586123	1586623	CG13917	sna,Su(var)3-9,gsb-n,kn,gro,z,Trl,yki,Dll,Tbp,dl,cad,Su(H),Med,insv,
CHR3L	15913574	15914074	sff	Trl,su(Hw),
CHR3L	15917820	15918320	sff	HDAC1,eve,Trl,yki,twi,Dll,Tbp,dl,cad,Su(H),Lpt,HDAC11,da,
CHR3L	15997252	15997752	CG5830	HDAC1,eve,CTCF,trem,Trl,CBP,Tbp,psq,dl,hb,Med,Sin3A,Ubx,HDAC6,HDAC11,
CHR3L	16014092	16014592	CG43949	D,pan,twi,HDAC4a,dl,slp1,HDAC11,da,
CHR3L	16017139	16017639	Notum	sna,gro,pan,twi,Dll,HDAC4a,dl,hb,Med,cad,da,
CHR3L	16021465	16021965	CG42717	pan,Trl,dl,
CHR3L	16036282	16036782	th	bap,Stat92E,HDAC1,shn,Mef2,gro,z,pan,Trl,CBP,twi,hth,Tbp,dl,tin,hb,Lpt,Med,tll,da,
CHR3L	16054526	16055026	Mbs	Su(var)3-9,gsb-n,bin,HDAC4a,
CHR3L	160712	161212	p130CAS	HDAC1,hkb,mod(mdg4),HDAC4a,twi,dl,Med,sens,da,Mef2,
CHR3L	16080335	16080835	Taspase1	Su(var)3-9,gsb-n,HDAC1,chinmo,HDAC3,twi,h,Tbp,HDAC4a,dl,slp1,Med,HDAC6,HDAC11,da,
CHR3L	16083301	16083801	ClC-c	HDAC1,HDAC4a,twi,Tbp,dl,Med,Sin3A,HDAC6,prd,E(z),
CHR3L	16146034	16146534	CG5151	-
CHR3L	16156903	16157403	CG5151	mod(mdg4),HDAC1,dm,CTCF,gro,Trl,CBP,yki,Dll,Tbp,dl,Su(H),
CHR3L	16159609	16160109	CG5151	-
CHR3L	1618133	1618633	CG33230	Su(var)3-9,HDAC1,dm,HDAC4a,Trl,yki,twi,Tbp,dl,hb,Med,Sin3A,HDAC11,HDAC6,prd,Ubx,da,
CHR3L	16208963	16209463	CG13073	gro,Dll,
CHR3L	16226912	16227412	l(3)72Dp	cnc,HDAC3,HDAC4a,HDAC6,HDAC1,
CHR3L	16344622	16345122	CG4925	HDAC1,ttk,CTCF,HDAC4a,trem,twi,HDAC3,sens,dl,slp1,Med,Sin3A,HDAC6,
CHR3L	16399118	16399618	fax	su(Hw),mod(mdg4),bin,CTCF,HDAC3,dl,
CHR3L	16400335	16400835	fax	HDAC1,CTCF,su(Hw),mod(mdg4),HDAC4a,Trl,twi,Tbp,dl,Med,sens,prd,da,
CHR3L	16401288	16401788	fax	CG8478,HDAC1,N,Mef2,CTCF,ttk,su(Hw),mod(mdg4),bin,gro,Trl,twi,yki,h,Dll,Tbp,HDAC4a,dl,Su(H),slp1,hb,Lpt,Med,disco,prd,da,
CHR3L	16403244	16403744	fax	sna,Hr78,bap,HDAC1,GATAe,ttk,bcd,CG8478,hkb,bin,gro,CTCF,Dfd,Trl,twi,bon,hth,Dll,Tbp,HDAC4a,dl,cad,Su(H),slp1,hb,Lpt,Med,jumu,sens,disco,Mef2,prd,da,
CHR3L	16412484	16412984	CG33158	Sin3A,HDAC1,GATAe,dm,HDAC4a,trem,twi,HDAC3,Tbp,dl,hb,Med,Ubx,HDAC6,prd,HDAC11,da,E(z),
CHR3L	16444638	16445138	dsx-c73A	hkb,Trl,dl,Mef2,
CHR3L	16521497	16521997	CG43373	CG8478,
CHR3L	1652599	1653099	CG7967	Hr78,Su(var)3-9,HDAC1,CTCF,HDAC3,Trl,sens,dl,Med,Sin3A,HDAC6,D,
CHR3L	16575833	16576333	Rpn12	cnc,HDAC11,HDAC1,HDAC4a,HDAC3,dl,Med,HDAC6,CTCF,
CHR3L	16577201	16577701	CG4169	sna,HDAC1,HDAC4a,trem,HDAC3,CTCF,twi,Tbp,dl,Med,Sin3A,HDAC11,Ubx,HDAC6,
CHR3L	16580059	16580559	CG32163	Su(var)3-9,HDAC1,CTCF,HDAC4a,trem,twi,HDAC3,sens,Tbp,dl,Med,jumu,Sin3A,Ubx,HDAC6,HDAC11,da,
CHR3L	16581274	16581774	l(3)73Ah	CG8478,Sin3A,HDAC1,kn,hkb,Kr,D,CTCF,HDAC4a,trem,tll,HDAC3,Trl,CBP,yki,twi,sens,Tbp,dl,Med,jumu,disco,HDAC11,Ubx,HDAC6,prd,kni,E(z),
CHR3L	16654188	16654688	Baldspot	HDAC1,GATAe,Mef2,su(Hw),mod(mdg4),dm,CTCF,gro,HDAC4a,trem,z,pan,Trl,yki,twi,sens,Tbp,dl,Su(H),Lpt,Med,jumu,Sin3A,disco,HDAC11,HDAC6,D,da,E(z),
CHR3L	16691201	16691701	CG9692	Trl,
CHR3L	16703130	16703630	CG43954	sna,HDAC1,CG8478,CTCF,Trl,twi,Dll,dl,
CHR3L	16706710	16707210	Dab	sna,HDAC11,Su(var)3-9,HDAC1,CTCF,HDAC4a,Trl,twi,psq,dl,Med,HDAC6,D,da,
CHR3L	16750167	16750667	CG42852	tin,Mef2,HDAC1,
CHR3L	16798543	16799043	nudC	Trl,HDAC11,
CHR3L	16822964	16823464	CG13024	tll,Trl,usp,
CHR3L	16838224	16838724	CG9715	HDAC1,psq,dm,tll,HDAC3,Trl,Tbp,dl,Med,Sin3A,HDAC6,CTCF,HDAC11,
CHR3L	16839398	16839898	CG32161	HDAC3,
CHR3L	16862177	16862677	Lmpt	-
CHR3L	16874753	16875253	CG32170	GATAe,
CHR3L	16893525	16894025	Lmpt	Trl,dl,
CHR3L	16909103	16909603	Lmpt	z,Trl,
CHR3L	16948890	16949390	Nc73EF	HDAC1,CTCF,HDAC4a,Stat92E,dl,Sin3A,HDAC6,
CHR3L	16996547	16997047	CG3764	gro,Trl,bin,
CHR3L	17008896	17009396	CG6664	Su(var)3-9,HDAC1,dm,CTCF,HDAC3,Trl,bon,Tbp,dl,Med,Sin3A,Ubx,HDAC6,HDAC11,da,
CHR3L	17109999	17110499	Rbp6	-
CHR3L	17112103	17112603	Rbp6	-
CHR3L	17116148	17116648	Rbp6	chinmo,dl,da,
CHR3L	17129185	17129685	Rbp6	su(Hw),CBP,
CHR3L	17131300	17131800	Rbp6	su(Hw),
CHR3L	17132567	17133067	Rbp6	HDAC1,su(Hw),
CHR3L	17197068	17197568	Rbp6	-
CHR3L	17211083	17211583	Rbp6	CTCF,
CHR3L	17225607	17226107	Rbp6	-
CHR3L	1746805	1747305	CG13921	sna,Su(var)3-9,HDAC1,kni,bcd,mod(mdg4),bin,eve,HDAC4a,z,tll,pan,Trl,twi,Tbp,dl,cad,slp1,hb,tin,Med,sens,disco,Mef2,HDAC11,prd,da,E(z),
CHR3L	17468155	17468655	CG7580	HDAC1,CTCF,mod(mdg4),dm,HDAC4a,z,HDAC3,sens,dl,bab1,Med,jumu,Sin3A,Ubx,HDAC6,cad,da,
CHR3L	17480104	17480604	Oatp74D	CG8478,Hr78,HDAC11,gsb-n,HDAC1,N,mod(mdg4),gro,zfh1,HDAC4a,Dfd,z,Trl,twi,yki,sc,Dll,Tbp,dl,Su(H),Lpt,Med,Mef2,prd,Eip74EF,Abd-B,da,lola,
CHR3L	17485650	17486150	edin	Trl,
CHR3L	17496734	17497234	edin	sens,
CHR3L	17510113	17510613	CG7564	HDAC3,
CHR3L	17517282	17517782	snoRNA:Edc3-a	-
CHR3L	17525994	17526494	Nedd4	sna,HDAC1,N,CG8478,hth,dm,Trl,twi,psq,dl,Sin3A,Mef2,da,kni,
CHR3L	17544259	17544759	CG7542	HDAC3,
CHR3L	17556752	17557252	snoRNA:Me28S-A576	CG8478,Hr78,N,su(Hw),mod(mdg4),gro,CTCF,Trl,yki,bon,twi,Dll,dl,Su(H),EcR,Abd-B,insv,
CHR3L	17563215	17563715	snoRNA:Me28S-A576	CG8478,Hr78,N,gro,Trl,Dll,Su(H),Abd-B,
CHR3L	17569235	17569735	Eip74EF	Trl,dl,
CHR3L	17570671	17571171	Eip74EF	Hr78,N,CG8478,gro,CTCF,Trl,yki,Dll,dl,Su(H),Hr39,EcR,insv,
CHR3L	17583678	17584178	Eip74EF	CG8478,Hr78,N,Mef2,gro,usp,Trl,yki,h,Dll,dl,Su(H),EcR,Abd-B,insv,
CHR3L	17600006	17600506	Eip74EF	Hr78,N,CG8478,eve,gro,Trl,yki,Dll,dl,Su(H),Abd-B,
CHR3L	17660838	17661338	snmRNA:641	HDAC1,N,CG8478,gro,Trl,dl,
CHR3L	17684089	17684589	Ccn	Dfd,
CHR3L	17706201	17706701	CheB74a	CTCF,twi,
CHR3L	1777456	1777956	mRpL46	HDAC11,HDAC1,HDAC3,HDAC4a,dl,Med,HDAC6,D,
CHR3L	17777823	17778323	CG42815	su(Hw),mod(mdg4),
CHR3L	17839305	17839805	MED19	CG8478,Sin3A,Su(var)3-9,HDAC1,ttk,psq,su(Hw),dm,Pcl,HDAC4a,HDAC3,Trl,twi,h,Tbp,dl,Med,Ubx,HDAC6,cad,CTCF,HDAC11,
CHR3L	17898730	17899230	Prestin	-
CHR3L	17909188	17909688	CG5290	-
CHR3L	17915695	17916195	CG5290	Dfd,dl,
CHR3L	17918077	17918577	CG43173	EcR,
CHR3L	17926636	17927136	CG43173	-
CHR3L	1794386	1794886	alpha-Spec	cnc,HDAC1,GATAe,N,Mef2,CG8478,CTCF,gro,zfh1,z,Trl,twi,yki,Dll,HDAC3,Tbp,dl,Su(H),slp1,Med,Sin3A,disco,da,E(z),
CHR3L	17955598	17956098	Eip75B	mod(mdg4),cnc,GATAe,gro,Trl,usp,EcR,
CHR3L	17968668	17969168	Eip75B	gro,Trl,usp,dl,EcR,da,
CHR3L	17975902	17976402	Eip75B	sbb,EcR,
CHR3L	17982949	17983449	Eip75B	sna,bap,Mef2,gro,z,Trl,bin,usp,yki,Tbp,psq,dl,EcR,Su(H),tin,Lpt,Med,HDAC1,
CHR3L	1798492	1798992	Patj	HDAC1,ttk,su(Hw),CTCF,HDAC4a,HDAC3,Trl,twi,dl,Med,sens,Sin3A,HDAC6,
CHR3L	18004916	18005416	snoRNA:Me28S-A30	cnc,gro,usp,Trl,twi,psq,dl,EcR,
CHR3L	1802868	1803368	CG42676	Su(var)3-9,HDAC1,GATAe,psq,HDAC4a,z,HDAC3,bin,Trl,CBP,twi,Tbp,dl,cad,slp1,Med,jumu,Sin3A,HDAC11,HDAC6,
CHR3L	18039951	18040451	CG42393	Hr78,Trl,
CHR3L	18056205	18056705	Eip75B	Hr78,cnc,N,Mef2,Trl,yki,CG8478,Dll,dl,Su(H),EcR,Abd-B,
CHR3L	18102518	18103018	CG5147	HDAC11,Su(var)3-9,gsb-n,HDAC1,CTCF,HDAC4a,trem,tll,HDAC3,twi,Tbp,dl,slp1,Med,jumu,sens,Sin3A,disco,HDAC6,
CHR3L	18146462	18146962	CG7330	su(Hw),mod(mdg4),dl,pan,
CHR3L	1815270	1815770	GV1	-
CHR3L	18164052	18164552	CG13699	Trl,Hr39,
CHR3L	18187086	18187586	CG7320	dm,gro,Stat92E,HDAC11,pan,brm,
CHR3L	18190431	18190931	CG7320	-
CHR3L	18220179	18220679	CheA75a	hth,
CHR3L	18227224	18227724	CheA75a	HDAC11,Su(var)3-9,HDAC1,CTCF,gro,z,Trl,yki,Dll,Tbp,psq,dl,Lpt,Med,sens,EcR,
CHR3L	18274009	18274509	CG5103	bap,HDAC1,Mef2,bin,gro,eve,hth,HDAC4a,pan,tin,HDAC11,Ubx,twi,
CHR3L	18357775	18358275	rpr	twi,da,
CHR3L	184149	184649	Mkp	Su(var)3-9,HDAC1,mod(mdg4),dm,tll,HDAC3,Tbp,HDAC4a,dl,Med,Sin3A,eve,HDAC6,HDAC11,Ubx,da,
CHR3L	18423469	18423969	skl	dl,cad,
CHR3L	18462981	18463481	Met75Cb	-
CHR3L	18471403	18471903	Met75Ca	sbb,prd,
CHR3L	18495922	18496422	AlCR2	su(Hw),
CHR3L	18519119	18519619	CG32198	-
CHR3L	18553463	18553963	star1	twi,Med,da,
CHR3L	18558742	18559242	star1	-
CHR3L	18577672	18578172	CG7271	-
CHR3L	18614989	18615489	not	CG8478,Hr78,mod(mdg4),Sin3A,HDAC1,N,dm,CTCF,gro,HDAC4a,trem,pan,Trl,twi,Tbp,dl,Med,EcR,Ubx,fru,HDAC6,da,
CHR3L	18675043	18675543	CG32202	HDAC1,GATAe,HDAC3,twi,Tbp,HDAC4a,dl,Med,HDAC6,HDAC11,kni,CTCF,
CHR3L	18676749	18677249	Chmp1	HDAC1,CTCF,HDAC4a,HDAC3,twi,dl,sens,HDAC6,
[truncated: 2,683 more rows]
